# Supplementary material for: Differential Susceptibility of Fetal Retinal Pigment Epithelial Cells, hiPSC- Retinal Stem Cells, and Retinal Organoids to Zika Virus Infection
Source: Viruses. 2023 Jan 1;15(1):142. doi: 10.3390/v15010142 (PMC9864143; doi:10.3390/v15010142)
Supplement: Supplementary file 1 [file viruses-15-00142-s001.zip]

Archive with 6 entries (6 files):
- Table_S1.xlsx
- Table_S2.xlsx
- Table_S3.xlsx
- Table_S4.xlsx
- Table_S5.xlsx
- viruses-2066094-supplementary.pdf
