# Supplementary material for: Differential Susceptibility of Fetal Retinal Pigment Epithelial Cells, hiPSC- Retinal Stem Cells, and Retinal Organoids to Zika Virus Infection
Source: Viruses. 2023 Jan 1;15(1):142. doi: 10.3390/v15010142 (PMC9864143; doi:10.3390/v15010142)
Supplement: Supplementary file 1 [file viruses-15-00142-s001.zip › Table_S1.xlsx]

## Sheet: Sheet1
					Table S1
					No.	Gene	Forward Primer Sequence (5'-3')	Reverse Primer Sequence (5'-3')
					1	ZIKV	AARTACACATACCARAACAAAGTGGT	TCCRCTCCCYCTYTGGTCTTG
					2	ISG15	TCCTGCTGGTGGTGGACAAATG	TGCGGCCCTTGTTATTCCTCAC
					3	TNFα	TCTTCTCGAACCCCGAGTGA	GGAGCTGCCCCTCAGCTT
					4	ICAM1	GTTCTCTAATGTCTCCGAGGC	CTTCAGAGGCAGGAAACAGG
					5	IL-6	CCCCCAGGAGAAGATTCCAA	TCAATTCGTTCTGAAGAGGTGAGT
					6	OAS1	TGTGTGTCCAAGGTGGTAAAGGG	AAGACAACCAGGTCAGCGTCAG
					7	MIX1	GCAAATCAAGGCACTGGAAGAGC	TGAAAGCAAGCCGGACCATATCC
					8	LAMP3	CAACCGATGTCCAACTTCAAGCC	AGACGAGCACTCATCCACATTTCC
					9	TMEM140	TCTCTGCACCTCCTTTCTGTCC	TCAGGCAGATGACCACAATCACG
					10	RASGRP3	GCCTCTCACCACTTAGAACCCAAC	TGTGATAGAGGTCCAGGGAAAGCG
					11	C19ORF66	ATGTCTCAGGAAGGTGTGGAGCTG	CGCTGCCGAATTTCCTCATCAGAG
					12	SAMHD1	CAGAAAGAGTTTGTATGCCGCAAG	GGGCTATAACATCGCCATCCTG
					13	ZNFX1	TCTCGCTGGCAGCTTTATAGGC	AGCTCGGCCATTCTTTCTGCTG
					14	STAT1	TGAACTTACCCAGAATGCCC	CACTATAGTTGCGGAGAGTCTG
					15	VEGFA	AGTCCAACATCACCATGCAG	TTCCCTTTCCTCGAACTGATTT
					16	SDC2	CCAGCCGAAGAGGATACAAATG	CTGTTGGTGTATCGCATGAGA
					17	GRP78	CTGCCATGGTTCTCACTAAAATG	CTGGAACTATTGCTGGCCTAA
					18	HSP70(HSPA1L)	GTTGTGCAGTTTGATATTGAGGG	CTCAGAGAACCATGGCTACTG
					19	HSP70(HSPA1B)	CATCAGCGGACTGTACCAG	AGTATGTTTGTCTTTGAGGTGGA
					20	HSP90AB1	TTGAGAACCTCTGCAAGCTC	CCAATATGGAGCGGATCATGA
					21	HSP90AA1	AGAAATGCCACCCCTTGAAG	CTGGCTGAGGGATGACTTAC
					22	HSP70 (HSPA5)	CTGCCATGGTTCTCACTAAAATG	CTGGAACTATTGCTGGCCTAA
					23	HSP70 (HSPA1A)	ATCCAGTGTTCCGTTTCCAG	CACGGCAAGGTGGAGATC
					24	L-SIGN	CTTCATGTCTAACTCCCAGCG	GTAACCGCTTCTCCTGGATG
					25	DC-SIGN	CATGTCTAACTCCCAGCGG	CTTCACCTGGATGGGACTTTC
					26	MANNOSE RECEPTOR (MRC1)	GCAAAGTGGATTACGTGTCTTG	CATTTGCCAGCGACATAACAG
					27	CLEC5A	AGTCCCAACGGCTTCATTAC	CTTGGAATGAAAGCAGGGACT
					28	LAMININ RECEPTOR (RPSA)	TGTCTTTTCCGTGCTACCTG	CCCTTGATGTCCTGCAAATG
					29	PROHIBITIN (PHB)	TCTTTGACTGCCGTTCTCG	CAGCATCGGAGAGGACTATGA
					30	TIM-1 (HAVCR1; CD365)	AACAGATGGGAATGACACCG	CTGTATTTCTGTCTTGGTGCTTC
					31	TIM-3 (HAVCR2)	CTTCTGCAAGCTCCATGTTTTC	CAGAAGTGGAATACAGAGCGG
					32	TIM-4	CCGTCAAAATGTCCAAAGAACC	GTCTGTACTCATCCTGGTCTCA
					33	TYRO3	ACCAAATCACCCAATCCCAG	GGAGTGGGGTGGTTATGTTT
					34	AXL	TTTATGACTATCTGCGCCAGG	CGGGAAGATTTGGAGAACACA
					35	MER (MERTK)	TGGCGGTCTTCAGTTGTG	CATTCTGATCTCCTGGGTTCC
					36	INTEGRIN aV (ITGAV)	AGAATCAAGGAGAAGGTGCC	GACAGAAAACCAAACTCGCC
					37	SCAVENGER RECEPTOR CLASS B TYPE 1 (SCARB1)	ATCCTCACTTCCTCAACGC	CCCATGAACTGCTCTGTGAA
					38	CLAUDIN-1	TTCATCGTGGCAGGTCTTG	CCCTTTGATCCCTACCAACAT
					39	NKp44 (NCR2)	TGGTGCCTGTGTTCTGTG	CACCTGCCACCTTCAACA
					40	ITGA5	ATACTCTGTGGCTGTTGGTG	CTACAACTTCTCAGGGGAACAG
					41	ITGB3	CAAGTGTGAATGTGGCAGC	GGAGCCCTACATGACGAAAA
					42	SOX2	GGAGAGTAAGAAACAGCATGGA	GTGGATGGGATTGGTGTTCT
					43	PAX6	GAACTGTCAGAGAAGGGCTATG	CCTGACCGTGGTGGAAATTA
					44	SIX3	CCTCTTCCTCCTCTTCCTTCT	GAGTGTGTGTGGACTTGTATGT
					45	LHX2	CGCCTGGAAACAGAGGTAAA	CAAATGTTGTGTTGCAGGTAGAT
					46	RX (RAX)	CCTGAAACCGACTTGGGAAA	ACAGCCCTGGTTATGCAATAG
					47	SIX6	GCCATGGTAGGTTTCTCTGTAG	GGTTGCCCACTAGGTTGTT
					48	VSX2 (CHX10)	CCAGACCAAGAAACGGAAGAA	GGTAGTGGGCTTCGTTGAAT
					49	IL6	GGAGACTTGCCTGGTGAAA	CTGGCTTGTTCCTCACTACTC
					50	OAS1	TTCGGACGGTCTTGGAATTAG	GCTGCCTTCTCAGGTACTTT
					51	CCL2	GCAGAAGTGGGTTCAGGATT	GCAGAAGTGGGTTCAGGATT
					52	CCL5	TCGTCTTTGTCACCCGAAAG	ACTCTCCATCCTAGCTCATCTC
					53	CXCL10	AGCTCTACTGAGGTGCTATGT	GTACCCTTGGAAGATGGGAAAG
					54	CXCL1	ACTCAAGAATGGGCGGAAAG	CCCTTCTGGTCAGTTGGATTT
					55	CCL4	GTACGTGTATGACCTGGAACTG	AGTCCTGAGTATGGAGGAGATG
					56	CCL11	TTCAGCGACTAGAGAGCTACA	GAATCCTGCACCCACTTCTT
