# Supplementary material for: Differential Susceptibility of Fetal Retinal Pigment Epithelial Cells, hiPSC- Retinal Stem Cells, and Retinal Organoids to Zika Virus Infection
Source: Viruses. 2023 Jan 1;15(1):142. doi: 10.3390/v15010142 (PMC9864143; doi:10.3390/v15010142)
Supplement: Supplementary file 1 [file viruses-15-00142-s001.zip › Table_S2.xlsx]

## Sheet: Sheet1
Gene	baseMean	log2FoldChange	lfcSE	stat	pvalue	padj	E_DC_hFRPE_48h_Mock_A	Q_DC_hFRPE_48h_Mock_B	G_DC_hFRPE_48h_ZIKV_A	H_DC_hFRPE_48h_ZIKV_B	I_DC_hFRPE_48h_ZIKV_C
ENSG00000111331.12_OAS3	3937.32	3.36658	0.075474	44.6058	0	0	513.699	521.174	6004.56	6609.27	6037.91
ENSG00000115267.5_IFIH1	1465.87	3.82907	0.100162	38.229	0	0	120.497	110.74	2258.93	2367.27	2471.91
ENSG00000119917.13_IFIT3	2871.56	4.26408	0.106018	40.2202	0	0	144.808	156.43	4181.4	5342.17	4532.97
ENSG00000119922.8_IFIT2	2714.85	5.33517	0.117804	45.2885	0	0	52.8497	32.525	4074.99	5022.8	4391.1
ENSG00000134321.11_RSAD2	1182.85	5.26212	0.136401	38.5784	0	0	0	0.774405	1754.24	2092.49	2066.74
ENSG00000137959.15_IFI44L	2359.66	4.12237	0.104986	39.2658	0	0	136.352	144.039	3365.59	3973.44	4178.87
ENSG00000157601.13_MX1	4373.32	6.25836	0.109921	56.9349	0	0	35.9378	34.0738	6878.13	7759.21	7159.24
ENSG00000162772.16_ATF3	1686.65	4.14593	0.101948	40.667	0	0	104.642	98.3494	2923.74	2646.2	2660.31
ENSG00000185745.9_IFIT1	6034.3	6.04251	0.104914	57.5949	0	0	59.1916	82.8613	9386.36	11036.9	9606.18
ENSG00000107201.9_DDX58	2809.21	2.83179	0.0782728	36.1785	1.3276e-286	2.08924e-283	517.927	539.76	4119.58	4594.55	4274.21
ENSG00000187608.8_ISG15	3582.06	3.85617	0.114011	33.8228	9.10891e-251	1.30315e-247	232.539	243.163	5608.31	6984.63	4841.68
ENSG00000138642.14_HERC6	1330.35	3.13687	0.0979286	32.0322	3.87985e-225	5.0881e-222	191.316	172.692	1968.08	2220.03	2099.65
ENSG00000173193.13_PARP14	5305.51	2.39724	0.0761673	31.4733	2.01339e-217	2.43729e-214	1389.95	1314.94	7293.64	8010.14	8518.9
ENSG00000138496.16_PARP9	2107.09	2.54223	0.0809032	31.4231	9.79096e-217	1.10057e-213	497.844	462.32	3015.96	3260.05	3299.29
ENSG00000184979.9_USP18	962.226	3.35403	0.110964	30.2261	1.07438e-200	1.12717e-197	82.4455	111.514	1503.93	1619.66	1493.59
ENSG00000138646.8_HERC5	608.501	3.84412	0.128838	29.8368	1.30144e-195	1.28005e-192	22.1969	30.9762	1020.52	975.733	993.077
ENSG00000181381.13_DDX60L	3123.3	2.29585	0.0776042	29.5841	2.39302e-192	2.21523e-189	864.621	830.936	4280.72	4825.78	4814.44
ENSG00000115415.18_STAT1	12100.5	1.8772	0.0640677	29.3003	1.02911e-188	8.99726e-186	4486.94	4363	16091.2	17463.7	18097.8
ENSG00000141682.11_PMAIP1	2178.95	2.26654	0.0785268	28.8632	3.45643e-183	2.74181e-180	581.347	618.749	3108.18	3177.1	3409.38
ENSG00000163840.9_DTX3L	3817.29	2.13463	0.0739573	28.863	3.48454e-183	2.74181e-180	1179.61	1145.34	5177.6	5707.16	5876.75
ENSG00000111335.12_OAS2	528.766	4.1639	0.145972	28.5254	5.67548e-179	4.2531e-176	1.05699	0	842.158	1014.1	786.517
ENSG00000137965.10_IFI44	740.807	3.80296	0.133537	28.4788	2.14751e-178	1.53616e-175	23.2539	36.397	1076.26	1383.24	1184.88
ENSG00000205413.7_SAMD9	831.871	3.30942	0.116679	28.3635	5.71033e-177	3.90711e-174	96.1864	69.6964	1241.45	1370.8	1381.23
ENSG00000089127.12_OAS1	514.156	4.10515	0.145758	28.1642	1.60496e-174	1.05239e-171	3.17098	0	869.521	958.106	739.985
ENSG00000188313.12_PLSCR1	1707.78	2.40709	0.0857327	28.0767	1.88448e-173	1.18625e-170	436.538	401.916	2433.24	2713.6	2553.63
ENSG00000130589.16_HELZ2	3022.66	2.72463	0.102047	26.6997	4.74844e-157	2.87409e-154	526.383	566.09	4778.31	5287.21	3955.29
ENSG00000134326.11_CMPK2	550.846	3.75233	0.143548	26.1398	1.28578e-150	7.49421e-148	13.7409	10.8417	792.5	1082.54	854.614
ENSG00000137628.16_DDX60	1215.76	2.65212	0.102288	25.928	3.22172e-148	1.81072e-145	242.052	220.705	1698.5	1875.77	2041.77
ENSG00000136826.14_KLF4	401.868	3.40761	0.139191	24.4815	2.32567e-132	1.26204e-129	19.0259	19.3601	706.359	657.402	607.196
ENSG00000126709.14_IFI6	2889.75	3.55703	0.148236	23.9958	3.0794e-127	1.61535e-124	72.9326	90.6054	4252.34	5714.42	4318.47
ENSG00000177409.11_SAMD9L	772.565	3.08288	0.130308	23.6585	9.65515e-124	4.90139e-121	95.1294	56.5316	1086.39	1300.29	1324.48
ENSG00000120738.7_EGR1	1533.11	2.08552	0.088736	23.5025	3.8418e-122	1.88932e-119	483.046	442.185	2189	2135	2416.3
ENSG00000101347.8_SAMHD1	3545.79	1.7078	0.0747998	22.8316	2.22678e-115	1.0619e-112	1406.86	1417.16	4584.75	5268.55	5051.64
ENSG00000135114.12_OASL	265.68	3.44484	0.150915	22.8264	2.51045e-115	1.16197e-112	0	1.54881	413.478	446.909	466.463
ENSG00000271503.5_CCL5	334.094	3.4173	0.151008	22.63	2.19803e-113	9.88295e-111	2.11399	3.87202	464.15	556.821	643.514
ENSG00000185885.15_IFITM1	355.148	3.18561	0.148652	21.4301	7.00777e-102	3.06337e-99	11.6269	12.3905	518.875	705.1	527.75
ENSG00000133106.14_EPSTI1	287.596	2.9816	0.145007	20.5618	6.03325e-94	2.56609e-91	17.9689	17.0369	424.626	503.939	474.407
ENSG00000221963.5_APOL6	536.437	2.68937	0.132328	20.3236	7.95977e-92	3.29639e-89	81.3885	62.7268	737.775	969.512	830.78
ENSG00000121060.14_TRIM25	5829.24	1.12424	0.0559562	20.0915	8.76212e-90	3.53563e-87	3298.88	3392.67	7634.15	7402.51	7418
ENSG00000073756.11_PTGS2	299.026	2.74939	0.138899	19.7942	3.34259e-87	1.31506e-84	32.7668	30.2018	466.177	466.61	499.376
ENSG00000163739.4_CXCL1	489.462	2.34529	0.119623	19.6057	1.38286e-85	5.30783e-83	95.1294	109.191	717.507	731.022	794.462
ENSG00000152778.8_IFIT5	1563.16	1.60451	0.0830773	19.3135	4.13564e-83	1.54958e-80	640.538	664.439	2103.88	2317.5	2089.43
ENSG00000106785.14_TRIM14	2278.93	1.55778	0.0815096	19.1116	2.02238e-81	7.40144e-79	1033.74	934.707	2959.21	3360.63	3106.35
ENSG00000163565.18_IFI16	2428.32	1.50555	0.0790971	19.0342	8.88187e-81	3.17668e-78	1141.55	1033.83	3101.09	3446.69	3418.46
ENSG00000059378.12_PARP12	1135.77	1.69998	0.0897953	18.9317	6.25357e-80	2.18694e-77	447.108	432.118	1496.83	1643.5	1659.29
ENSG00000170345.9_FOS	284.829	2.62428	0.13989	18.7596	1.61634e-78	5.52963e-76	29.5958	36.397	469.217	429.281	459.653
ENSG00000130813.17_C19orf66	1096.56	1.70261	0.0918794	18.5309	1.16315e-76	3.89457e-74	405.886	435.216	1490.75	1652.84	1498.13
ENSG00000166750.9_SLFN5	8102.88	1.31936	0.0733104	17.9969	2.06119e-72	6.7577e-70	4115.93	4063.3	10212.3	10270.6	11852.2
ENSG00000168394.10_TAP1	2468.11	1.35911	0.0767426	17.7099	3.51611e-70	1.12925e-67	1227.17	1195.68	3406.13	3452.91	3058.68
ENSG00000125347.13_IRF1	1035.15	1.71235	0.100499	17.0385	4.25202e-65	1.33828e-62	392.145	377.91	1481.63	1604.1	1319.94
ENSG00000185507.19_IRF7	772.193	2.10026	0.12332	17.031	4.84048e-65	1.49362e-62	188.145	194.376	1194.83	1331.39	952.219
ENSG00000101255.10_TRIB3	1020.9	1.55858	0.0940998	16.5631	1.28846e-61	3.89933e-59	432.31	423.599	1502.91	1438.2	1307.46
ENSG00000196116.7_TDRD7	1055.4	1.37141	0.0843696	16.2548	2.06467e-59	6.13051e-57	501.015	513.43	1409.68	1420.57	1432.3
ENSG00000068079.7_IFI35	535.365	1.9933	0.123658	16.1195	1.86205e-58	5.42648e-56	136.352	150.235	796.554	897.965	695.722
ENSG00000169429.10_CXCL8	682.121	1.89153	0.117486	16.1001	2.54744e-58	7.28893e-56	231.482	183.534	1001.27	897.965	1096.36
ENSG00000118503.14_TNFAIP3	1690.83	1.30509	0.0814107	16.031	7.76538e-58	2.18221e-55	867.792	834.034	2370.41	2101.82	2280.11
ENSG00000055332.16_EIF2AK2	7210.5	1.22178	0.0762548	16.0223	8.9266e-58	2.46453e-55	3946.81	3729.53	8821.88	9132.08	10422.2
ENSG00000124201.14_ZNFX1	5352.89	0.993714	0.0624183	15.9202	4.58646e-57	1.24443e-54	3380.27	3191.32	6546.74	6631.05	7015.1
ENSG00000117228.9_GBP1	2690.01	1.1599	0.0737096	15.7361	8.55287e-56	2.2813e-53	1493.53	1483.76	3434.51	3728.73	3309.5
ENSG00000051108.14_HERPUD1	3750.12	1.14402	0.072712	15.7336	8.89854e-56	2.33394e-53	2112.93	2080.05	5127.94	4483.6	4946.09
ENSG00000213928.8_IRF9	1234.78	1.33772	0.0852364	15.6942	1.65603e-55	4.27229e-53	582.404	626.494	1667.09	1719.2	1578.71
ENSG00000138035.14_PNPT1	2910.33	1.1441	0.0732529	15.6185	5.44591e-55	1.38229e-52	1689.08	1564.3	3688.88	3617.78	3991.6
ENSG00000135899.16_SP110	1272.37	1.31395	0.0843768	15.5724	1.12143e-54	2.80125e-52	620.455	645.854	1689.38	1786.6	1619.57
ENSG00000067066.16_SP100	4603.74	1.02688	0.0659924	15.5606	1.34753e-54	3.31344e-52	2745.01	2786.31	5636.68	5658.42	6192.26
ENSG00000128590.4_DNAJB9	1713.38	1.30554	0.0841265	15.5188	2.58755e-54	6.26466e-52	903.73	813.9	2345.07	2128.78	2375.44
ENSG00000175197.10_DDIT3	762.88	1.61842	0.104925	15.4246	1.11801e-53	2.66578e-51	277.989	315.183	1096.53	1139.57	985.133
ENSG00000163734.4_CXCL3	145.781	2.3925	0.155251	15.4105	1.39128e-53	3.26784e-51	8.45595	8.51845	238.155	246.785	226.989
ENSG00000130766.4_SESN2	1375.58	1.24941	0.0814355	15.3424	3.98286e-53	9.2174e-51	705.015	724.843	1852.55	1872.66	1722.85
ENSG00000170581.13_STAT2	4500.84	1.0789	0.0726703	14.8465	7.32824e-50	1.67137e-47	2682.65	2540.05	5329.61	6112.59	5839.3
ENSG00000105939.12_ZC3HAV1	5051.53	1.19614	0.0811407	14.7416	3.48478e-49	7.83428e-47	2794.69	2628.33	6428.17	6069.04	7337.42
ENSG00000164211.12_STARD4	3127.19	0.929692	0.0631476	14.7225	4.622e-49	1.02446e-46	1963.89	2006.48	3779.07	3951.67	3934.86
ENSG00000171855.6_IFNB1	117.339	2.33698	0.15891	14.7063	5.86985e-49	1.28297e-46	0	0.774405	170.256	201.161	214.505
ENSG00000104635.13_SLC39A14	5373.58	0.874357	0.0595412	14.6849	8.05524e-49	1.73651e-46	3498.65	3546.77	6808.2	6352.12	6662.13
ENSG00000128965.11_CHAC1	344.538	1.96566	0.133983	14.671	9.89079e-49	2.1034e-46	93.0154	78.2149	571.573	523.64	456.248
ENSG00000135111.14_TBX3	1043.68	1.44422	0.0990786	14.5765	3.96456e-48	8.31871e-46	508.414	422.825	1463.39	1332.43	1491.32
ENSG00000151014.5_CCRN4L	1161.21	1.18173	0.0817423	14.4568	2.27217e-47	4.70488e-45	619.398	635.786	1538.38	1484.86	1527.64
ENSG00000172183.14_ISG20	208.159	2.13927	0.148651	14.3913	5.87175e-47	1.20005e-44	29.5958	33.2994	280.719	356.697	340.484
ENSG00000132109.9_TRIM21	1237.47	1.37003	0.0960521	14.2634	3.69884e-46	7.46264e-44	550.694	611.005	1644.79	1838.44	1542.39
ENSG00000059728.10_MXD1	1047.42	1.39176	0.098175	14.1763	1.28422e-45	2.5582e-43	503.129	463.869	1440.08	1289.92	1540.12
ENSG00000136244.11_IL6	352.08	1.69814	0.123842	13.7121	8.59563e-43	1.69087e-40	119.44	116.935	531.036	481.127	511.86
ENSG00000116285.12_ERRFI1	3776.66	1.13608	0.0843466	13.4691	2.37611e-41	4.6164e-39	2156.27	2024.29	4930.32	4388.21	5384.18
ENSG00000280755.1_AC009950.1	667.462	1.55435	0.115947	13.4057	5.59718e-41	1.07418e-38	281.16	240.066	837.091	928.036	1050.96
ENSG00000156587.15_UBE2L6	480.986	1.71113	0.127727	13.3967	6.31868e-41	1.19804e-38	165.948	146.363	683.05	804.643	604.926
ENSG00000088826.17_SMOX	638.751	1.42795	0.106728	13.3793	7.98956e-41	1.49681e-38	299.129	264.072	939.447	839.898	851.209
ENSG00000087074.7_PPP1R15A	5069.8	1.16911	0.087577	13.3495	1.19318e-40	2.20906e-38	2498.73	2974.49	7105.14	6791.77	5978.89
ENSG00000142089.15_IFITM3	6924.51	0.954591	0.0715823	13.3356	1.4374e-40	2.63027e-38	4324.16	4294.08	8310.1	9467	8227.22
ENSG00000108771.12_DHX58	202.982	2.01339	0.151716	13.2708	3.41728e-40	6.11111e-38	41.2228	23.2321	278.693	349.439	322.325
ENSG00000185880.12_TRIM69	946.571	1.24045	0.0934703	13.271	3.40773e-40	6.11111e-38	483.046	486.326	1240.43	1343.84	1179.21
ENSG00000117226.11_GBP3	1114.64	1.09565	0.0829902	13.2022	8.52059e-40	1.50661e-37	641.595	624.17	1401.57	1472.41	1433.44
ENSG00000090520.10_DNAJB11	5700.8	0.797522	0.060523	13.1772	1.18741e-39	2.07625e-37	3734.36	4041.62	6903.47	6796.95	7027.58
ENSG00000140105.17_WARS	5325.28	0.757325	0.0580212	13.0526	6.14396e-39	1.0625e-36	3639.23	3789.94	6518.36	6442.33	6236.53
ENSG00000168672.3_FAM84B	8905.84	-0.717991	0.0562133	-12.7726	2.3322e-37	3.98933e-35	11793.9	11680.3	6918.67	7317.48	6818.75
ENSG00000138166.5_DUSP5	1044.34	1.08236	0.0853875	12.6758	8.04887e-37	1.36199e-34	602.486	588.548	1349.89	1296.14	1384.63
ENSG00000081041.8_CXCL2	109.598	2.00094	0.158508	12.6236	1.5649e-36	2.61987e-34	5.28497	9.29286	159.108	182.496	191.806
ENSG00000116761.11_CTH	285.654	1.69159	0.134346	12.5913	2.35809e-36	3.90623e-34	98.3004	79.7637	447.935	409.58	392.691
ENSG00000165891.15_E2F7	2143.72	1.00858	0.08078	12.4855	8.96147e-36	1.46903e-33	1331.81	1234.4	2733.21	2522.81	2896.38
ENSG00000128335.13_APOL2	1580.39	1.06319	0.0855357	12.4298	1.80101e-35	2.92191e-33	896.331	924.639	1864.71	2173.37	2042.9
ENSG00000178607.15_ERN1	764.042	1.31931	0.106219	12.4206	2.02029e-35	3.24422e-33	358.321	363.97	1109.7	914.556	1073.66
ENSG00000102580.14_DNAJC3	4899.81	0.959729	0.0779164	12.3174	7.29955e-35	1.16033e-32	3052.6	2991.53	6019.76	5658.42	6776.76
ENSG00000065911.11_MTHFD2	3709.48	0.84425	0.0704311	11.9869	4.1622e-33	6.55006e-31	2474.42	2432.41	4659.74	4225.41	4755.42
ENSG00000112149.9_CD83	194.166	1.70723	0.143943	11.8605	1.89841e-32	2.95796e-30	51.7927	52.6595	295.921	268.56	301.896
ENSG00000160710.15_ADAR	15617.9	0.638136	0.0538727	11.8453	2.27675e-32	3.51267e-30	11838.3	11362.8	18102.9	17878.4	18907.1
ENSG00000105559.11_PLEKHA4	531.438	1.44586	0.124822	11.5834	5.00095e-31	7.64078e-29	211.399	216.833	745.882	855.452	627.625
ENSG00000139318.7_DUSP6	1062.16	1.04849	0.0918491	11.4154	3.5038e-30	5.30185e-28	606.714	616.426	1351.91	1267.11	1468.62
ENSG00000002549.12_LAP3	2905.27	0.841381	0.0751463	11.1966	4.23822e-29	6.35209e-27	1882.51	1951.5	3447.68	3850.05	3394.62
ENSG00000165312.6_OTUD1	624.711	1.10337	0.0995921	11.0789	1.58893e-28	2.35896e-26	342.466	344.61	821.89	784.942	829.645
ENSG00000213853.9_EMP2	4175.24	-0.630638	0.0570442	-11.0552	2.06781e-28	3.04122e-26	5298.71	5382.11	3380.79	3441.51	3373.06
ENSG00000006652.13_IFRD1	2193.82	0.828357	0.075171	11.0196	3.07333e-28	4.47823e-26	1407.92	1506.22	2772.74	2531.1	2751.11
ENSG00000149428.18_HYOU1	16101.4	0.616153	0.0559892	11.0048	3.62129e-28	5.22828e-26	11969.4	12193.8	19655.4	18136.6	18551.8
ENSG00000140464.19_PML	4871.65	0.653187	0.0594257	10.9916	4.19203e-28	5.94325e-26	3543.04	3621.89	5623.51	5940.46	5629.33
ENSG00000163644.14_PPM1K	661.263	1.10151	0.100214	10.9916	4.19202e-28	5.94325e-26	365.72	361.647	808.715	879.301	890.932
ENSG00000187678.8_SPRY4	1281.62	1.0623	0.0972399	10.9245	8.80204e-28	1.23676e-25	762.092	690.769	1662.02	1480.71	1812.51
ENSG00000111981.4_ULBP1	207.614	1.56597	0.143397	10.9206	9.19283e-28	1.28024e-25	54.9637	72.7941	322.27	298.63	289.411
ENSG00000153879.8_CEBPG	1396.53	0.847095	0.0783118	10.8169	2.86144e-27	3.95004e-25	899.502	932.383	1781.61	1673.57	1695.61
ENSG00000113070.7_HBEGF	1793.19	0.886823	0.0825475	10.7432	6.38008e-27	8.73072e-25	1113.01	1178.64	2366.35	2056.19	2251.73
ENSG00000165949.12_IFI27	87.868	1.69218	0.159387	10.6168	2.48858e-26	3.3761e-24	5.28497	4.64643	129.719	179.386	120.304
ENSG00000149289.10_ZC3H12C	1417.65	0.856768	0.0807745	10.6069	2.76732e-26	3.72216e-24	955.522	892.114	1754.24	1670.46	1815.91
ENSG00000071537.13_SEL1L	7455.78	0.774353	0.0731964	10.5791	3.72433e-26	4.96692e-24	5136.99	5080.1	9050.92	8242.41	9768.48
ENSG00000144655.14_CSRNP1	1159.27	0.978185	0.0939462	10.4122	2.1817e-25	2.88516e-23	713.471	675.281	1616.42	1424.72	1366.47
ENSG00000163347.5_CLDN1	1919.15	0.718166	0.0691016	10.3929	2.67093e-25	3.47376e-23	1346.61	1369.15	2282.24	2267.72	2330.04
ENSG00000174136.11_RGMB	4293.53	0.612465	0.0589305	10.393	2.66847e-25	3.47376e-23	3181.55	3264.89	4972.89	4914.96	5133.36
ENSG00000023445.13_BIRC3	1441.68	1.09454	0.105534	10.3714	3.34499e-25	4.31476e-23	796.973	778.277	1845.45	1616.54	2171.15
ENSG00000178685.13_PARP10	309.967	1.49738	0.144463	10.3652	3.57156e-25	4.56957e-23	98.3004	103.77	442.868	548.526	356.373
ENSG00000166710.17_B2M	13951.8	0.570774	0.0551115	10.3567	3.90136e-25	4.95126e-23	10834.2	10590	15449.7	16590.6	16294.4
ENSG00000178381.11_ZFAND2A	513.23	1.10075	0.106637	10.3224	5.58101e-25	7.02627e-23	280.103	277.237	699.265	650.143	659.403
ENSG00000139289.13_PHLDA1	3767.08	0.650131	0.06335	10.2625	1.03962e-24	1.29846e-22	2804.2	2735.97	4355.71	4314.59	4624.9
ENSG00000169248.12_CXCL11	61.7078	1.61727	0.157968	10.238	1.34012e-24	1.66059e-22	0	0	98.3024	117.171	93.0655
ENSG00000164342.12_TLR3	187.522	1.52034	0.149729	10.1539	3.1822e-24	3.91237e-22	56.0207	52.6595	229.035	317.295	282.601
ENSG00000172936.12_MYD88	2123.62	0.739478	0.0731738	10.1058	5.20839e-24	6.35383e-22	1526.3	1440.39	2577.15	2642.05	2432.19
ENSG00000142188.16_TMEM50B	1715.06	0.752931	0.0746423	10.0872	6.29476e-24	7.62005e-22	1206.03	1169.35	2070.43	1986.72	2142.78
ENSG00000163661.3_PTX3	1376.83	0.910465	0.0904979	10.0606	8.24738e-24	9.90755e-22	839.253	881.273	1768.43	1554.33	1840.88
ENSG00000104856.13_RELB	595.187	1.01878	0.102015	9.98657	1.74516e-23	2.08058e-21	334.01	351.58	768.178	790.126	732.04
ENSG00000163545.8_NUAK2	1239.88	0.794876	0.0797882	9.96233	2.2278e-23	2.63601e-21	850.88	821.644	1515.07	1468.27	1543.53
ENSG00000133639.4_BTG1	2181.53	0.702903	0.0708893	9.9155	3.56459e-23	4.18627e-21	1523.13	1585.21	2712.94	2549.76	2536.6
ENSG00000169245.5_CXCL10	59.4053	1.54685	0.157329	9.83193	8.20316e-23	9.56245e-21	0	0	90.195	117.171	89.6607
ENSG00000113742.12_CPEB4	2945.28	0.777858	0.0795313	9.78052	1.36503e-22	1.57953e-20	1986.09	2021.97	3498.35	3306.71	3913.29
ENSG00000170385.9_SLC30A1	2451.29	0.634636	0.0651677	9.73851	2.06563e-22	2.37276e-20	1818.03	1812.11	2851.78	2833.88	2940.64
ENSG00000059758.7_CDK17	2543.96	0.720273	0.0740357	9.72873	2.27409e-22	2.59329e-20	1804.29	1781.13	2998.73	2879.5	3256.16
ENSG00000185022.11_MAFF	962.615	1.00536	0.10392	9.67436	3.87507e-22	4.3872e-20	528.497	585.45	1375.22	1217.33	1106.57
ENSG00000132256.18_TRIM5	2664.85	0.648615	0.0679091	9.55123	1.28162e-21	1.44064e-19	1966.01	1946.85	3069.67	3052.67	3289.07
ENSG00000174010.9_KLHL15	669.399	1.01734	0.107444	9.46858	2.83685e-21	3.16621e-19	391.088	373.263	871.547	772.499	938.6
ENSG00000077522.12_ACTN2	88.6187	1.50092	0.158729	9.45589	3.20285e-21	3.54952e-19	15.8549	16.2625	131.746	131.688	147.543
ENSG00000132530.16_XAF1	70.9056	1.47097	0.156202	9.41714	4.63522e-21	5.10101e-19	0	0	77.0205	137.909	139.598
ENSG00000112343.10_TRIM38	999.362	0.807526	0.0858391	9.40743	5.08393e-21	5.55596e-19	653.222	676.83	1176.59	1247.4	1242.77
ENSG00000069431.10_ABCC9	217.814	1.37978	0.14678	9.40035	5.43817e-21	5.9021e-19	82.4455	70.4708	330.377	255.08	350.698
ENSG00000100219.16_XBP1	2892.57	0.610936	0.065181	9.37291	7.05583e-21	7.60531e-19	2167.89	2168.33	3500.38	3356.48	3269.78
ENSG00000130513.6_GDF15	339.385	1.16209	0.124053	9.36767	7.41492e-21	7.938e-19	174.404	161.851	448.948	488.385	423.335
ENSG00000155918.7_RAET1L	53.8864	1.46511	0.156497	9.36192	7.83e-21	8.32572e-19	0	0	83.101	81.916	104.415
ENSG00000113811.10_SELK	1099.89	0.829942	0.0887415	9.35236	8.5714e-21	9.05289e-19	674.362	765.886	1391.44	1361.46	1306.32
ENSG00000155660.10_PDIA4	14840.9	0.476821	0.0510454	9.34111	9.53256e-21	9.9347e-19	11945.1	11944.4	17164.4	16828	16322.8
ENSG00000186919.12_ZACN	310.652	-1.31974	0.141274	-9.3417	9.47953e-21	9.9347e-19	440.766	643.53	147.96	170.053	150.948
ENSG00000148339.12_SLC25A25	1236.34	0.815446	0.0877508	9.29274	1.50363e-20	1.55675e-18	786.403	848.748	1589.05	1550.18	1407.33
ENSG00000167772.11_ANGPTL4	231.965	1.32791	0.143009	9.28551	1.60939e-20	1.65536e-18	83.5025	94.4774	382.062	294.483	305.3
ENSG00000197329.11_PELI1	307.676	1.18201	0.127761	9.25171	2.20932e-20	2.25767e-18	157.492	138.618	400.304	445.872	396.096
ENSG00000265972.5_TXNIP	435.143	1.05449	0.114173	9.23595	2.56002e-20	2.59916e-18	251.565	226.901	592.855	539.194	565.203
ENSG00000105835.11_NAMPT	2634.84	0.60174	0.065306	9.21416	3.13725e-20	3.1648e-18	1977.64	1989.45	3028.12	3009.12	3169.9
ENSG00000118946.11_PCDH17	248.212	1.3107	0.142307	9.21032	3.25161e-20	3.25927e-18	78.2175	115.386	321.256	361.882	364.318
ENSG00000160888.6_IER2	2853.05	0.70902	0.0772481	9.17848	4.37226e-20	4.35483e-18	1858.2	2174.53	3462.88	3436.32	3333.34
ENSG00000100906.10_NFKBIA	1487.61	0.701371	0.0766408	9.1514	5.61987e-20	5.56226e-18	1054.88	1059.39	1781.61	1836.37	1705.82
ENSG00000100889.11_PCK2	439.72	1.09307	0.119729	9.12952	6.88044e-20	6.76735e-18	239.938	223.803	639.473	574.449	520.94
ENSG00000169826.7_CSGALNACT2	1370.07	0.765847	0.0843344	9.08107	1.07513e-19	1.05089e-17	906.901	961.036	1670.13	1555.37	1756.9
ENSG00000171223.5_JUNB	1387.77	0.852649	0.0942206	9.04949	1.43631e-19	1.39526e-17	831.854	951.744	1821.13	1780.38	1553.74
ENSG00000112715.20_VEGFA	2549.95	0.626537	0.0698885	8.96481	3.10817e-19	3.00081e-17	1815.92	1964.67	2891.31	3058.89	3018.96
ENSG00000130303.12_BST2	54.804	1.38085	0.155251	8.89433	5.8773e-19	5.6397e-17	0	0	84.1145	116.134	73.7715
ENSG00000138135.6_CH25H	51.9053	1.39392	0.156969	8.88025	6.67108e-19	6.3626e-17	2.11399	1.54881	85.1279	78.8053	91.9306
ENSG00000070669.16_ASNS	1618.38	0.837803	0.0944444	8.87085	7.25867e-19	6.8813e-17	1111.96	988.915	2173.8	1784.52	2032.69
ENSG00000204267.13_TAP2	1731.19	0.654939	0.0738819	8.86468	7.67252e-19	7.23009e-17	1235.63	1288.61	1987.33	2117.37	2027.01
ENSG00000120217.13_CD274	1085.69	0.891371	0.100822	8.84101	9.4858e-19	8.8856e-17	743.067	612.554	1250.57	1444.42	1377.82
ENSG00000117036.11_ETV3	1555.73	0.705675	0.0800795	8.81218	1.2273e-18	1.14284e-16	1046.42	1151.54	1847.48	1796.97	1936.22
ENSG00000142627.12_EPHA2	8199.07	0.532027	0.0604512	8.80093	1.35691e-18	1.2561e-16	6263.74	6545.27	9857.61	9274.13	9054.6
ENSG00000143067.4_ZNF697	691.779	0.922668	0.104978	8.78918	1.50653e-18	1.38645e-16	392.145	446.832	924.246	803.606	892.067
ENSG00000132274.15_TRIM22	3986.69	0.516752	0.0595763	8.67378	4.18013e-18	3.82457e-16	3095.93	3180.48	4437.8	4609.07	4610.15
ENSG00000144802.11_NFKBIZ	974.337	0.759414	0.0876218	8.66695	4.43836e-18	4.03737e-16	685.989	645.079	1132	1197.63	1210.99
ENSG00000165997.4_ARL5B	2140.85	0.64295	0.0743223	8.65083	5.11247e-18	4.62384e-16	1600.29	1541.84	2460.6	2425.34	2676.2
ENSG00000101384.11_JAG1	665.994	0.884252	0.102365	8.63822	5.70942e-18	5.13423e-16	427.025	405.014	853.306	767.314	877.313
ENSG00000128228.4_SDF2L1	1205.72	0.773066	0.0897481	8.61372	7.0725e-18	6.32386e-16	795.916	834.034	1538.38	1522.19	1338.1
ENSG00000059804.15_SLC2A3	1247.46	0.819801	0.0953293	8.59967	7.99459e-18	7.10796e-16	825.512	807.704	1685.33	1371.83	1546.93
ENSG00000134070.4_IRAK2	985.847	0.792459	0.0923657	8.57959	9.52141e-18	8.41789e-16	689.16	627.268	1250.57	1124.01	1238.23
ENSG00000118515.11_SGK1	2285.54	0.581953	0.0678653	8.57512	9.89872e-18	8.70258e-16	1742.98	1730.02	2723.08	2670.05	2561.57
ENSG00000213626.11_LBH	5451.53	-0.638113	0.0747616	-8.53531	1.39778e-17	1.22205e-15	6914.85	7151.63	4378.01	4786.38	4026.79
ENSG00000134107.4_BHLHE40	1116.09	0.733889	0.0863217	8.50179	1.86694e-17	1.62321e-15	773.719	773.63	1392.45	1384.28	1256.38
ENSG00000104312.7_RIPK2	1512.49	0.646239	0.0761837	8.48264	2.2014e-17	1.90348e-15	1084.48	1127.53	1775.52	1730.6	1844.29
ENSG00000148841.15_ITPRIP	2525.85	0.60021	0.0709689	8.45736	2.73493e-17	2.35189e-15	1893.08	1903.49	3119.33	2880.54	2832.82
ENSG00000110446.9_SLC15A3	103.874	1.33504	0.158263	8.43557	3.29592e-17	2.81891e-15	19.0259	32.525	159.108	167.98	140.733
ENSG00000156804.7_FBXO32	5095.07	-0.549293	0.0653408	-8.40659	4.22107e-17	3.59064e-15	6484.66	6208.4	4152.01	4524.04	4106.23
ENSG00000178573.6_MAF	1021.73	-0.69893	0.0833016	-8.39035	4.84684e-17	4.10079e-15	1354.01	1349.79	798.581	776.647	829.645
ENSG00000184164.14_CRELD2	2310.89	0.602687	0.0720098	8.36952	5.78544e-17	4.86874e-15	1700.7	1765.64	2741.32	2796.55	2550.22
ENSG00000125378.15_BMP4	2330.12	-0.640968	0.0767314	-8.3534	6.63229e-17	5.52235e-15	3058.94	2965.2	1799.85	2033.38	1793.21
ENSG00000240065.7_PSMB9	168.972	1.25975	0.150797	8.35393	6.6028e-17	5.52235e-15	60.2486	63.5012	260.451	265.449	195.211
ENSG00000109220.10_CHIC2	540.224	0.858221	0.102925	8.33829	7.53695e-17	6.24258e-15	351.979	332.994	669.875	669.845	676.428
ENSG00000166669.13_ATF7IP2	408.629	0.965159	0.116376	8.29346	1.10003e-16	9.0634e-15	251.565	221.48	516.848	503.939	549.314
ENSG00000111252.10_SH2B3	1557.44	0.663998	0.0803954	8.25916	1.46703e-16	1.20243e-14	1164.81	1088.04	1844.44	1750.31	1939.62
ENSG00000150630.3_VEGFC	2414.32	0.594951	0.0720747	8.25464	1.52365e-16	1.24237e-14	1806.4	1829.14	2829.49	2653.46	2953.13
ENSG00000198805.11_PNP	3035.51	0.611128	0.074582	8.19404	2.526e-16	2.04905e-14	2250.34	2277.52	3814.54	3307.75	3527.41
ENSG00000060718.18_COL11A1	7312.69	-0.464034	0.0566499	-8.19126	2.58504e-16	2.0862e-14	8683.2	8931.21	6278.18	6538.76	6132.11
ENSG00000079215.13_SLC1A3	317.21	1.09322	0.133511	8.18822	2.65113e-16	2.12862e-14	149.036	165.723	398.277	381.583	491.431
ENSG00000079335.17_CDC14A	330.352	1.09864	0.134207	8.1862	2.696e-16	2.15366e-14	176.518	150.235	406.384	403.358	515.265
ENSG00000115902.10_SLC1A4	568.116	0.83333	0.101859	8.18125	2.80925e-16	2.23279e-14	362.549	368.617	680.01	726.875	702.531
ENSG00000049130.13_KITLG	2223.8	0.743303	0.0908882	8.17821	2.88097e-16	2.27828e-14	1527.36	1525.58	2786.93	2347.57	2931.56
ENSG00000134986.13_NREP	4017.58	-0.586878	0.0723948	-8.10664	5.20378e-16	4.0946e-14	5238.46	4931.41	3188.24	3570.09	3159.69
ENSG00000204256.12_BRD2	10061.7	0.417366	0.0517147	8.07056	6.9977e-16	5.47875e-14	8194.87	8465.02	11349.4	11045.2	11254.1
ENSG00000169359.13_SLC33A1	2245.21	0.582159	0.0723908	8.04189	8.84598e-16	6.89154e-14	1707.04	1695.95	2600.45	2477.18	2745.43
ENSG00000023608.4_SNAPC1	1117.11	0.660333	0.0821569	8.03746	9.17194e-16	7.11029e-14	818.113	798.411	1277.93	1342.8	1348.32
ENSG00000162298.16_SYVN1	1940.2	0.571036	0.0716173	7.97344	1.5432e-15	1.19046e-13	1476.62	1482.21	2335.95	2169.22	2236.98
ENSG00000157557.11_ETS2	3131.09	0.489065	0.0613665	7.96959	1.59206e-15	1.22216e-13	2518.82	2477.32	3593.61	3582.53	3483.15
ENSG00000167034.9_NKX3-1	418.484	0.908369	0.114528	7.93138	2.16721e-15	1.6556e-13	235.71	266.395	531.036	512.234	547.044
ENSG00000164125.15_FAM198B	934.019	-0.799255	0.100873	-7.92334	2.31206e-15	1.75772e-13	1305.39	1283.96	620.217	781.831	678.697
ENSG00000050628.20_PTGER3	52.3596	1.2482	0.157593	7.92041	2.36725e-15	1.79103e-13	4.22797	6.96964	80.0608	80.8791	89.6607
ENSG00000136147.16_PHF11	726.66	0.80359	0.101604	7.909	2.59462e-15	1.94778e-13	459.792	491.747	871.547	972.623	837.59
ENSG00000243649.8_CFB	196.5	1.14408	0.14466	7.90878	2.59919e-15	1.94778e-13	73.9896	98.3494	246.263	277.892	286.006
ENSG00000185112.5_FAM43A	139.634	1.24359	0.157391	7.90128	2.76044e-15	2.05882e-13	43.3367	41.8179	228.021	237.453	147.543
ENSG00000145365.10_TIFA	368.086	0.922689	0.117144	7.8765	3.36674e-15	2.49917e-13	209.285	226.126	481.378	458.315	465.328
ENSG00000137198.9_GMPR	604.856	0.793359	0.101199	7.8396	4.51985e-15	3.33939e-13	397.43	400.367	741.829	778.72	705.936
ENSG00000154642.10_C21orf91	763.37	0.780321	0.0996156	7.83332	4.75153e-15	3.49415e-13	492.559	522.723	880.668	906.26	1014.64
ENSG00000133401.15_PDZD2	485.157	0.846105	0.108346	7.80929	5.75127e-15	4.20966e-13	303.357	309.762	585.761	587.929	638.974
ENSG00000272886.5_DCP1A	1612.34	0.590514	0.0756472	7.80616	5.8957e-15	4.2954e-13	1268.39	1163.16	1867.75	1884.07	1878.33
ENSG00000176641.10_RNF152	733.22	0.855446	0.109733	7.7957	6.40524e-15	4.64512e-13	444.994	473.936	948.568	795.311	1003.29
ENSG00000146674.14_IGFBP3	3646.65	0.562179	0.0722184	7.78443	7.00258e-15	5.05503e-13	2725.99	2857.55	4510.76	3958.93	4180
ENSG00000171522.5_PTGER4	324.677	0.960914	0.12407	7.74496	9.56118e-15	6.87051e-13	194.487	174.241	391.183	434.466	429.009
ENSG00000137331.11_IER3	6393.69	0.431064	0.0558118	7.72352	1.13156e-14	8.09425e-13	5161.3	5344.94	6987.58	7183.72	7290.89
ENSG00000163431.12_LMOD1	351.991	-0.977874	0.126674	-7.71961	1.16683e-14	8.30881e-13	542.238	527.37	221.941	267.523	200.885
ENSG00000186567.12_CEACAM19	270.78	0.987902	0.128344	7.69729	1.38978e-14	9.85182e-13	157.492	140.167	351.659	350.476	354.103
ENSG00000130775.15_THEMIS2	118.519	1.2052	0.156874	7.68259	1.55907e-14	1.10023e-12	45.4507	32.525	159.108	201.161	154.353
ENSG00000090339.8_ICAM1	1797.37	0.662995	0.0866717	7.6495	2.01768e-14	1.41751e-12	1253.59	1333.53	2352.16	2025.09	2022.47
ENSG00000113140.10_SPARC	43657.3	-0.355118	0.0466303	-7.61561	2.62457e-14	1.83568e-12	50857.3	49909.6	38785.9	39800.8	38933.2
ENSG00000244405.7_ETV5	2332.15	0.546583	0.071848	7.60749	2.79461e-14	1.94596e-12	1747.21	1851.6	2770.71	2555.99	2735.22
ENSG00000168062.9_BATF2	53.9464	1.17606	0.155074	7.58387	3.35388e-14	2.32511e-12	5.28497	3.09762	77.0205	115.097	69.2317
ENSG00000128165.8_ADM2	58.3337	1.19828	0.158642	7.55338	4.24117e-14	2.92252e-12	9.51294	10.0673	103.37	88.1375	80.5811
ENSG00000166592.11_RRAD	221.003	1.08798	0.144046	7.55302	4.25276e-14	2.92252e-12	103.585	102.221	323.283	330.775	245.148
ENSG00000197976.10_AKAP17A	988.214	0.680512	0.0901195	7.55121	4.31219e-14	2.9377e-12	718.756	687.672	1179.63	1248.44	1106.57
ENSGR0000197976.10_AKAP17A	988.214	0.680512	0.0901195	7.55121	4.31219e-14	2.9377e-12	718.756	687.672	1179.63	1248.44	1106.57
ENSG00000123609.10_NMI	353.21	0.947084	0.12549	7.54708	4.4511e-14	3.00631e-12	205.057	197.473	410.438	507.05	446.034
ENSG00000125657.4_TNFSF9	115.131	1.16353	0.154164	7.54734	4.44226e-14	3.00631e-12	40.1658	45.6899	173.296	157.611	158.892
ENSG00000007944.14_MYLIP	303.458	0.970389	0.128626	7.54429	4.54747e-14	3.04939e-12	181.803	155.655	418.545	362.919	398.366
ENSG00000070614.14_NDST1	12217.6	-0.39783	0.0527338	-7.54412	4.55364e-14	3.04939e-12	14522	14167	10839.6	11069	10490.3
ENSG00000270276.2_HIST2H4B	129.912	1.168	0.155005	7.53526	4.87364e-14	3.24985e-12	46.5077	48.0131	152.014	190.792	212.235
ENSG00000148411.7_NACC2	5737.74	-0.521515	0.0693997	-7.51466	5.70595e-14	3.7888e-12	7157.96	7008.36	4869.52	5172.11	4480.77
ENSG00000179388.8_EGR3	46.683	1.16645	0.155253	7.51323	5.76868e-14	3.81436e-12	6.34196	1.54881	78.0339	72.5838	74.9064
ENSG00000198576.3_ARC	67.2054	1.19649	0.159363	7.50794	6.00667e-14	3.95511e-12	13.7409	14.7137	95.2622	119.245	93.0655
ENSG00000164107.8_HAND2	1285.21	-0.735348	0.0981033	-7.49565	6.597e-14	4.32571e-12	1756.72	1719.95	886.749	1124.01	938.6
ENSG00000135069.13_PSAT1	3573.09	0.451938	0.0605837	7.45973	8.67017e-14	5.66151e-12	2867.62	2937.32	4069.92	3919.52	4071.05
ENSG00000166471.10_TMEM41B	2212.2	0.546934	0.0733819	7.45326	9.10632e-14	5.92174e-12	1714.44	1697.5	2469.72	2466.81	2712.52
ENSG00000173846.12_PLK3	1544.5	0.573669	0.0769902	7.45121	9.2491e-14	5.98984e-12	1215.54	1132.18	1831.26	1810.45	1733.06
ENSG00000136158.10_SPRY2	1985.13	0.539503	0.0727229	7.41861	1.1836e-13	7.63375e-12	1495.65	1577.46	2361.29	2194.1	2297.13
ENSG00000078401.6_EDN1	692.764	0.792581	0.107364	7.38219	1.55704e-13	1.00013e-11	443.937	461.545	927.286	754.871	876.178
ENSG00000110330.8_BIRC2	4484.1	0.606566	0.0821818	7.38079	1.57358e-13	1.00664e-11	3423.6	3250.95	5330.63	4682.69	5732.61
ENSG00000115461.4_IGFBP5	2909.21	-0.538003	0.0730276	-7.36712	1.74356e-13	1.11087e-11	3465.88	3767.48	2519.38	2504.14	2289.19
ENSG00000100664.10_EIF5	9364.75	0.415314	0.0564333	7.35937	1.84784e-13	1.17256e-11	7849.24	7657.32	10527.5	10025.9	10763.8
ENSG00000131979.18_GCH1	380.941	0.874623	0.119002	7.34964	1.98746e-13	1.25609e-11	235.71	227.675	505.7	439.65	495.971
ENSG00000140941.12_MAP1LC3B	9143.62	0.391106	0.0532669	7.34238	2.09824e-13	1.3208e-11	7782.64	7545.8	10371.4	9962.64	10055.6
ENSG00000118898.15_PPL	1253.19	-0.829572	0.112994	-7.34171	2.10883e-13	1.32218e-11	1785.26	1765.64	823.916	1101.2	789.922
ENSG00000165030.3_NFIL3	809.542	0.66365	0.0906075	7.32445	2.39881e-13	1.49802e-11	577.119	583.901	966.81	929.072	990.808
ENSG00000125740.13_FOSB	129.899	1.15342	0.157875	7.30589	2.75434e-13	1.71324e-11	38.0518	47.2387	201.672	138.946	223.584
ENSG00000104722.13_NEFM	153.91	1.08349	0.148316	7.3053	2.76651e-13	1.71404e-11	71.8756	65.8244	222.954	188.718	220.179
ENSG00000253309.6_SERPINE3	631.719	-0.712757	0.0977196	-7.29389	3.01124e-13	1.85835e-11	817.056	876.626	476.311	491.496	497.106
ENSG00000044574.7_HSPA5	49701.1	0.420264	0.0577674	7.2751	3.46165e-13	2.12797e-11	41533.5	40537.8	55974.6	52425.2	58034.3
ENSG00000004468.12_CD38	186.397	1.0358	0.142489	7.26928	3.61411e-13	2.21305e-11	99.3574	84.4101	259.437	256.117	232.664
ENSG00000164442.9_CITED2	18387.1	-0.339402	0.0469348	-7.23137	4.78159e-13	2.91659e-11	21152.6	21034.4	16685.1	16493.1	16570.2
ENSG00000151414.14_NEK7	7545.1	0.477762	0.0661028	7.22756	4.91743e-13	2.98786e-11	5933.96	6148.77	8526.98	8022.58	9093.18
ENSG00000125826.19_RBCK1	2966.85	0.478173	0.066261	7.21652	5.33363e-13	3.22828e-11	2316.93	2432.41	3339.24	3486.1	3259.56
ENSG00000121101.15_TEX14	40.1976	1.0974	0.152214	7.20954	5.61399e-13	3.38496e-11	3.17098	0.774405	76.007	64.2885	56.7473
ENSG00000142867.12_BCL10	1213.1	0.645599	0.0900406	7.17009	7.49483e-13	4.50176e-11	903.73	854.943	1385.36	1355.24	1566.22
ENSG00000075711.20_DLG1	15732.8	-0.387467	0.0541467	-7.15588	8.3135e-13	4.97451e-11	18527	18277.5	13368.1	14194.3	14296.9
ENSG00000168389.17_MFSD2A	391.649	0.841158	0.117641	7.15022	8.66415e-13	5.16468e-11	251.565	236.968	502.66	515.345	451.708
ENSG00000198855.6_FICD	569.566	0.799663	0.111852	7.14929	8.72283e-13	5.18004e-11	358.321	377.135	727.641	623.184	761.549
ENSG00000117479.12_SLC19A2	687.766	0.800376	0.112334	7.12497	1.041e-12	6.15873e-11	467.191	421.276	847.225	748.65	954.489
ENSG00000134954.14_ETS1	6661.84	0.437521	0.0616881	7.09247	1.31736e-12	7.76452e-11	5536.53	5361.98	7607.8	7072.77	7730.11
ENSG00000172331.11_BPGM	829.257	0.690825	0.0975272	7.08341	1.40649e-12	8.25891e-11	579.233	584.676	1020.52	905.223	1056.63
ENSG00000124920.13_MYRF	14036.8	-0.384844	0.0543672	-7.0786	1.45622e-12	8.51916e-11	16303.1	16503.3	12532	12873.3	11972.5
ENSG00000109320.11_NFKB1	2288.21	0.545979	0.0772056	7.07175	1.52997e-12	8.91748e-11	1674.28	1847.73	2732.2	2483.4	2703.44
ENSG00000196611.4_MMP1	6385.64	0.641806	0.0909857	7.05392	1.73945e-12	1.0101e-10	4920.31	4348.28	7674.68	6576.09	8408.81
ENSG00000145675.14_PIK3R1	1111.3	0.633146	0.0900053	7.03455	1.99908e-12	1.1566e-10	805.429	815.448	1266.78	1242.22	1426.63
ENSG00000131871.14_VIMP	1599.16	0.507692	0.0722321	7.02861	2.08595e-12	1.20244e-10	1248.31	1268.48	1812.01	1812.52	1854.5
ENSG00000234127.8_TRIM26	2145.79	0.547766	0.0781663	7.00769	2.42282e-12	1.39153e-10	1627.77	1672.71	2545.73	2602.65	2280.11
ENSG00000163376.11_KBTBD8	572.919	0.829608	0.118575	6.99651	2.62417e-12	1.50169e-10	369.948	347.708	745.882	606.593	794.462
ENSG00000006459.10_KDM7A	309.639	0.881549	0.126207	6.98492	2.85011e-12	1.62508e-10	183.917	183.534	406.384	356.697	417.66
ENSG00000168564.5_CDKN2AIP	1002.12	0.613722	0.0880292	6.9718	3.12918e-12	1.77776e-10	768.434	712.452	1129.97	1171.71	1228.01
ENSG00000103966.9_EHD4	2560.39	0.483848	0.0695133	6.96051	3.39047e-12	1.91927e-10	1978.69	2103.28	2936.91	2995.64	2787.43
ENSG00000140853.15_NLRC5	1010.14	0.692132	0.0996784	6.94365	3.82089e-12	2.15517e-10	743.067	672.183	1108.69	1340.73	1186.02
ENSG00000164949.7_GEM	1168.46	0.579184	0.0835964	6.92834	4.25813e-12	2.39322e-10	866.735	895.212	1413.73	1289.92	1376.69
ENSG00000150347.14_ARID5B	6548.98	-0.399078	0.0576273	-6.92516	4.35492e-12	2.43891e-10	7866.15	7532.64	5725.86	5647.02	5973.22
ENSG00000092969.11_TGFB2	3936.55	-0.411981	0.0596148	-6.91072	4.82197e-12	2.6909e-10	4668.74	4635.59	3356.47	3480.91	3541.03
ENSG00000094804.9_CDC6	2182.57	0.465313	0.0673997	6.90379	5.06347e-12	2.81568e-10	1763.07	1752.48	2454.52	2411.86	2530.93
ENSG00000164161.9_HHIP	1670.95	0.679438	0.0989013	6.86985	6.42672e-12	3.56117e-10	1196.52	1160.83	1932.61	1771.04	2293.73
ENSG00000168404.12_MLKL	466.899	0.743208	0.108382	6.85733	7.01616e-12	3.87415e-10	325.554	302.792	558.398	584.818	562.933
ENSG00000169047.5_IRS1	4182.37	-0.403448	0.0588427	-6.85639	7.06227e-12	3.88598e-10	5011.21	4842.35	3631.11	3768.14	3659.06
ENSG00000099958.14_DERL3	89.0281	1.08596	0.158971	6.83117	8.42248e-12	4.61828e-10	25.3678	32.525	114.517	152.426	120.304
ENSG00000113916.17_BCL6	1302.95	0.581638	0.085185	6.82795	8.61385e-12	4.70681e-10	1044.31	919.219	1568.79	1478.64	1503.8
ENSG00000137124.6_ALDH1B1	2918.68	-0.524254	0.0767983	-6.82637	8.70901e-12	4.74234e-10	3518.73	3711.72	2540.66	2581.91	2240.38
ENSG00000120526.10_NUDCD1	1726.5	0.481583	0.0709754	6.78521	1.15922e-11	6.29055e-10	1401.57	1354.43	1975.17	1939.02	1962.32
ENSG00000056558.10_TRAF1	384.699	0.8275	0.122101	6.77716	1.22561e-11	6.62796e-10	213.513	263.298	504.687	456.241	485.757
ENSG00000170396.7_ZNF804A	1587.84	0.615897	0.0909311	6.77323	1.25936e-11	6.78719e-10	1166.92	1169.35	1871.8	1674.61	2056.52
ENSG00000135842.16_FAM129A	2154.46	0.446779	0.0661209	6.757	1.40878e-11	7.54079e-10	1750.38	1753.25	2446.41	2402.52	2419.7
ENSG00000180354.15_MTURN	718.171	-0.649888	0.0961748	-6.75736	1.40525e-11	7.54079e-10	966.092	915.347	580.694	534.009	594.712
ENSG00000108821.13_COL1A1	17719.4	-0.521007	0.0771154	-6.75619	1.41665e-11	7.5572e-10	21996	21852.2	14235.6	16718.1	13795.3
ENSG00000123983.13_ACSL3	3818.68	0.431959	0.0639752	6.75197	1.45855e-11	7.75445e-10	3036.74	3219.98	4212.82	4183.94	4439.91
ENSG00000102921.7_N4BP1	1832.43	0.515013	0.0765359	6.72904	1.70782e-11	9.04915e-10	1503.05	1367.6	2031.92	2171.29	2088.3
ENSG00000116514.16_RNF19B	768.199	0.614167	0.0920924	6.66903	2.57496e-11	1.3598e-09	561.264	569.188	938.434	883.448	888.662
ENSG00000165821.11_SALL2	1813.38	-0.465064	0.0697692	-6.66575	2.63316e-11	1.38589e-09	2174.24	2209.38	1596.15	1535.67	1551.47
ENSG00000166963.12_MAP1A	11448.1	-0.382107	0.0574532	-6.65075	2.916e-11	1.52964e-09	13555.9	13186.6	10230.5	9705.49	10561.8
ENSG00000090020.10_SLC9A1	3644.01	0.439236	0.0661111	6.64391	3.05474e-11	1.5918e-09	2963.81	2984.56	4314.16	4040.84	3916.7
ENSG00000123095.5_BHLHE41	1205.18	-0.524832	0.0789922	-6.6441	3.05079e-11	1.5918e-09	1497.76	1490.73	978.971	1035.87	1022.59
ENSG00000117475.13_BLZF1	1406.55	0.559895	0.0843021	6.64154	3.10427e-11	1.61227e-09	1034.8	1105.85	1644.79	1522.19	1725.12
ENSG00000234571.1_RP5-998N21.4	65.5997	1.05633	0.159404	6.62675	3.43165e-11	1.77644e-09	22.1969	14.7137	103.37	91.2482	96.4704
ENSG00000159216.18_RUNX1	4322.73	0.386809	0.0584341	6.61958	3.6022e-11	1.85517e-09	3624.43	3627.31	4786.42	4670.25	4905.23
ENSG00000184205.14_TSPYL2	1067.03	0.561175	0.0847776	6.61937	3.6073e-11	1.85517e-09	825.512	798.411	1189.76	1228.74	1292.7
ENSG00000144597.13_EAF1	1526.25	0.527521	0.0797582	6.614	3.74064e-11	1.91747e-09	1189.12	1180.97	1824.17	1640.39	1796.62
ENSG00000175105.5_ZNF654	841.856	0.622867	0.0942041	6.61188	3.79458e-11	1.93881e-09	642.652	589.322	935.393	1006.84	1035.07
ENSG00000185947.14_ZNF267	554.236	0.731438	0.110842	6.59895	4.14081e-11	2.10886e-09	368.891	377.91	602.989	691.62	729.77
ENSG00000170525.18_PFKFB3	2191.59	0.444949	0.0675023	6.59161	4.35089e-11	2.20871e-09	1799	1767.19	2519.38	2400.45	2471.91
ENSG00000116741.7_RGS2	106.584	1.03875	0.157771	6.5839	4.58271e-11	2.31891e-09	42.2797	38.7202	169.242	119.245	163.432
ENSG00000197632.8_SERPINB2	3720.29	0.59487	0.0904738	6.57506	4.86351e-11	2.45311e-09	2697.45	2840.52	4609.07	3743.25	4711.16
ENSG00000143367.15_TUFT1	3730.09	0.438331	0.0668846	6.55354	5.61905e-11	2.82514e-09	2992.35	3096.85	4401.31	4180.83	3979.12
ENSG00000125812.15_GZF1	1080.24	0.544277	0.0831232	6.54784	5.83746e-11	2.92561e-09	846.652	813.9	1255.64	1205.93	1279.08
ENSG00000070961.14_ATP2B1	3796.47	0.494837	0.0757363	6.53368	6.41715e-11	3.18458e-09	3024.06	2981.46	4298.96	3984.85	4693
ENSG00000110619.16_CARS	3180.6	0.412274	0.0630957	6.53411	6.39897e-11	3.18458e-09	2681.59	2584.96	3646.31	3517.2	3472.93
ENSG00000130518.16_KIAA1683	198.155	0.923539	0.14136	6.53326	6.43514e-11	3.18458e-09	120.497	94.4774	261.464	249.896	264.442
ENSG00000138434.16_SSFA2	16336.2	-0.42235	0.0646354	-6.53434	6.38891e-11	3.18458e-09	19860.9	18947.4	13272.9	14593.5	15006.3
ENSG00000106484.14_MEST	7392.23	-0.398065	0.0609497	-6.53104	6.53163e-11	3.2222e-09	8922.08	8465.79	6541.67	6792.81	6238.8
ENSG00000076356.6_PLXNA2	854.632	0.677729	0.103934	6.52078	6.99442e-11	3.43972e-09	604.6	595.517	1087.41	893.817	1091.82
ENSG00000136603.13_SKIL	3911.07	0.515117	0.0790676	6.5149	7.27381e-11	3.56598e-09	3065.28	3048.06	4228.02	4244.08	4969.93
ENSG00000141574.7_SECTM1	97.1595	1.02292	0.157042	6.5137	7.33208e-11	3.58338e-09	36.9948	40.2691	139.853	147.241	121.439
ENSG00000180628.14_PCGF5	2320.98	0.428983	0.0659213	6.50751	7.64086e-11	3.72273e-09	1924.79	1883.35	2584.24	2560.13	2652.37
ENSG00000171345.13_KRT19	40634.6	-0.356259	0.0547662	-6.50509	7.76445e-11	3.77127e-09	46656.8	47285.9	36619.2	37876.3	34735
ENSG00000135604.9_STX11	80.589	1.03332	0.158867	6.50427	7.80699e-11	3.78026e-09	27.4818	29.4274	126.678	104.728	114.63
ENSG00000116584.17_ARHGEF2	2723.18	0.46289	0.0712362	6.49796	8.14165e-11	3.93022e-09	2082.28	2300.76	3173.04	3069.26	2990.58
ENSG00000113615.12_SEC24A	3017.45	0.455997	0.0703015	6.48631	8.79658e-11	4.23339e-09	2473.37	2404.53	3312.89	3271.45	3625.02
ENSG00000095739.10_BAMBI	1229.54	0.579351	0.0893993	6.48049	9.14267e-11	4.38653e-09	856.165	988.915	1429.95	1499.37	1373.28
ENSG00000113448.16_PDE4D	259.086	0.883189	0.136713	6.46015	1.04601e-10	5.00338e-09	144.808	150.235	321.256	295.52	383.612
ENSG00000114757.18_PEX5L	270.586	0.915799	0.141805	6.45815	1.05989e-10	5.0544e-09	138.466	154.107	342.538	294.483	423.335
ENSG00000136205.16_TNS3	9992.82	-0.381423	0.0591611	-6.44719	1.13945e-10	5.41736e-09	11840.4	11505.3	8688.11	9347.75	8582.46
ENSG00000149639.14_SOGA1	4779.97	-0.395013	0.0614745	-6.42564	1.3132e-10	6.22464e-09	5723.62	5506.79	4243.22	4053.29	4372.95
ENSG00000136514.2_RTP4	32.9538	0.948972	0.147772	6.42188	1.34598e-10	6.35535e-09	2.11399	0.774405	46.6177	65.3254	49.9376
ENSG00000171227.6_TMEM37	827.573	-0.600001	0.0934354	-6.42156	1.34885e-10	6.35535e-09	1067.56	1057.84	698.251	696.804	617.41
ENSG00000162231.13_NXF1	3763.62	0.445358	0.0693976	6.41748	1.38548e-10	6.48909e-09	3230.17	2890.85	4100.33	4254.45	4342.3
ENSG00000163602.9_RYBP	1525.59	0.49891	0.0777404	6.41764	1.38405e-10	6.48909e-09	1174.32	1230.53	1756.27	1661.13	1805.7
ENSG00000206190.11_ATP10A	1780.52	0.494141	0.0770322	6.41473	1.41076e-10	6.58789e-09	1328.64	1484.53	1988.34	2035.46	2065.6
ENSG00000005700.14_IBTK	2990.21	0.480674	0.0752869	6.38457	1.71879e-10	8.00256e-09	2360.27	2403.75	3354.44	3166.73	3665.87
ENSG00000141582.14_CBX4	867.249	0.623087	0.0978374	6.3686	1.90762e-10	8.85552e-09	580.29	681.476	1075.25	1014.1	985.133
ENSG00000164236.11_ANKRD33B	373.182	0.732881	0.115204	6.36161	1.99655e-10	9.23358e-09	254.735	244.712	444.895	456.241	465.328
ENSG00000227036.6_LINC00511	83.063	1.01159	0.159024	6.36128	2.0008e-10	9.23358e-09	23.2539	35.6226	118.571	113.023	124.844
ENSG00000130066.16_SAT1	3943.7	0.430711	0.0677373	6.35854	2.03674e-10	9.372e-09	3060	3397.31	4534.07	4304.22	4422.88
ENSG00000104419.14_NDRG1	779.071	0.582845	0.0918347	6.34668	2.20018e-10	1.00945e-08	567.606	597.841	935.393	886.559	907.956
ENSG00000105281.12_SLC1A5	4014.48	0.512824	0.0812237	6.31373	2.72389e-10	1.2461e-08	3037.8	3237.79	5061.06	4548.93	4186.81
ENSG00000152689.17_RASGRP3	209.071	0.880552	0.139504	6.312	2.75445e-10	1.25643e-08	119.44	116.161	240.182	277.892	291.681
ENSG00000163083.5_INHBB	486.621	-0.666128	0.105848	-6.29325	3.10892e-10	1.41402e-08	636.31	654.372	362.807	397.137	382.477
ENSG00000173402.11_DAG1	11792.9	-0.322378	0.051383	-6.27401	3.51871e-10	1.59579e-08	13572.9	13323.6	10776.8	10425.1	10866
ENSG00000086619.13_ERO1LB	254.743	0.873134	0.139187	6.27311	3.539e-10	1.59848e-08	149.036	140.167	303.015	294.483	387.016
ENSG00000162852.13_CNST	1683.09	0.473489	0.0754823	6.27285	3.54495e-10	1.59848e-08	1350.84	1340.49	1874.84	1841.55	2007.72
ENSG00000023318.7_ERP44	2051.24	0.449152	0.0716132	6.27192	3.56627e-10	1.6035e-08	1713.39	1613.86	2249.81	2391.12	2288.05
ENSG00000128272.14_ATF4	5676.1	0.38284	0.0611599	6.25967	3.85804e-10	1.72974e-08	4887.54	4649.53	6536.61	6235.98	6070.82
ENSG00000133056.13_PIK3C2B	675.876	-0.598701	0.0958636	-6.24534	4.22888e-10	1.89062e-08	894.217	843.327	568.533	531.935	541.369
ENSG00000138764.13_CCNG2	1103.86	0.513945	0.082322	6.24311	4.28952e-10	1.9123e-08	865.678	858.041	1217.13	1285.77	1292.7
ENSG00000170802.15_FOXN2	1103.24	0.620156	0.0993615	6.24141	4.33651e-10	1.92779e-08	787.46	819.32	1232.33	1202.82	1474.29
ENSG00000153487.12_ING1	690.547	0.623409	0.0999207	6.23904	4.40268e-10	1.95169e-08	491.502	511.882	843.171	753.834	852.344
ENSG00000170961.6_HAS2	532.732	0.806823	0.129415	6.23441	4.53492e-10	2.00466e-08	285.388	370.94	672.916	567.19	767.223
ENSG00000106780.8_MEGF9	1737.46	-0.500461	0.0805205	-6.21532	5.12205e-10	2.25786e-08	2193.26	2078.5	1451.23	1382.2	1582.11
ENSG00000067064.10_IDI1	4820.48	0.365281	0.0588164	6.21054	5.28029e-10	2.32112e-08	4088.45	4081.11	5122.87	5430.3	5379.64
ENSG00000088888.17_MAVS	6085.24	-0.330994	0.0533944	-6.19904	5.68102e-10	2.47126e-08	6925.42	7002.94	5543.45	5427.19	5527.19
ENSG00000109929.9_SC5D	2462.06	0.414607	0.0668836	6.19893	5.68466e-10	2.47126e-08	2008.29	2056.82	2655.18	2768.55	2821.47
ENSG00000113721.13_PDGFRB	3339.65	-0.438897	0.0707874	-6.20021	5.6387e-10	2.47126e-08	4186.75	3812.4	2958.19	2985.27	2755.65
ENSG00000172602.9_RND1	37.2031	0.939081	0.151484	6.19922	5.67441e-10	2.47126e-08	4.22797	4.64643	71.9533	51.8456	53.3424
ENSG00000143333.6_RGS16	27.715	0.89537	0.144636	6.19053	5.99636e-10	2.59745e-08	1.05699	0	47.6311	45.6241	44.2629
ENSG00000167981.5_ZNF597	238.016	0.838185	0.135405	6.19022	6.00796e-10	2.59745e-08	149.036	133.198	304.028	275.818	327.999
ENSG00000184371.13_CSF1	1408.16	0.52943	0.0858852	6.16439	7.07553e-10	3.05062e-08	1045.37	1130.63	1664.05	1702.61	1498.13
ENSG00000122729.18_ACO1	5985.41	-0.358577	0.0581929	-6.16187	7.18897e-10	3.09106e-08	6984.61	6874.39	5576.89	5225	5266.15
ENSG00000234745.9_HLA-B	2548.78	0.621746	0.101024	6.15441	7.53584e-10	3.23138e-08	1812.74	1892.65	3004.81	3477.8	2555.9
ENSG00000111110.11_PPM1H	1176.29	-0.523193	0.0852662	-6.136	8.46245e-10	3.60904e-08	1493.53	1430.33	1027.62	1014.1	915.901
ENSG00000128510.10_CPA4	15650.9	-0.363011	0.0591569	-6.13641	8.44057e-10	3.60904e-08	18341	17965.4	14223.5	14545.8	13179
ENSG00000049249.8_TNFRSF9	41.2971	0.943674	0.154645	6.10218	1.04634e-09	4.45034e-08	6.34196	8.51845	70.9399	55.9932	64.6919
ENSG00000134109.10_EDEM1	4450.2	0.403027	0.0660619	6.10075	1.05574e-09	4.4782e-08	3765.01	3628.86	5010.38	4670.25	5176.49
ENSG00000146232.14_NFKBIE	763.46	0.662099	0.10875	6.08826	1.14146e-09	4.8288e-08	518.984	556.023	990.118	962.254	789.922
ENSG00000198742.9_SMURF1	3304.98	0.413492	0.0680726	6.07429	1.24538e-09	5.2543e-08	2725.99	2732.87	3743.6	3471.58	3850.87
ENSG00000070081.15_NUCB2	3045.62	0.468475	0.07724	6.06518	1.31804e-09	5.54597e-08	2506.13	2373.55	3314.92	3274.57	3758.94
ENSG00000164284.14_GRPEL2	1094.42	0.573211	0.094572	6.06111	1.35182e-09	5.67204e-08	847.709	796.088	1279.96	1160.3	1388.04
ENSG00000204264.8_PSMB8	1002.7	0.602623	0.0994311	6.06071	1.3552e-09	5.67204e-08	725.098	750.398	1204.97	1288.88	1044.15
ENSG00000176018.12_LYSMD3	2003.77	0.513613	0.0848103	6.05602	1.39529e-09	5.82431e-08	1480.85	1641.74	2191.03	2199.29	2505.96
ENSG00000013588.5_GPRC5A	6338.02	-0.408639	0.0675334	-6.05093	1.44016e-09	5.99572e-08	7913.71	7078.06	5583.98	5764.19	5350.13
ENSG00000173546.7_CSPG4	7671.6	-0.515151	0.0852293	-6.04429	1.50068e-09	6.23121e-08	9455.87	9546.86	6836.58	6959.75	5558.96
ENSG00000141458.12_NPC1	4288.2	0.352052	0.0582693	6.0418	1.52402e-09	6.29487e-08	3693.14	3621.89	4769.19	4594.55	4762.23
ENSG00000184602.5_SNN	956.846	-0.558025	0.0923572	-6.04203	1.52186e-09	6.29487e-08	1129.93	1285.51	791.487	819.16	758.144
ENSG00000112972.14_HMGCS1	4806.66	0.364697	0.0605652	6.02157	1.72738e-09	7.11617e-08	4087.39	4057.88	5065.11	5425.12	5397.8
ENSG00000148154.9_UGCG	12191.2	-0.344498	0.0572238	-6.02019	1.74216e-09	7.15833e-08	14518.9	13551.3	10738.3	10835.7	11312
ENSG00000065308.4_TRAM2	9162.05	-0.306485	0.050944	-6.01612	1.78649e-09	7.32137e-08	10529.8	10237.6	8311.12	8351.28	8380.44
ENSG00000106105.13_GARS	8309.97	0.345427	0.0576105	5.99591	2.02355e-09	8.27133e-08	7194.96	7026.95	9490.75	8795.08	9042.11
ENSG00000155090.14_KLF10	1859.77	0.478849	0.0802003	5.97066	2.363e-09	9.63382e-08	1567.52	1394.7	2155.56	2005.39	2175.69
ENSG00000115963.13_RND3	9900.21	0.334214	0.0562254	5.94418	2.77836e-09	1.1298e-07	8603.93	8432.49	10721	10477	11266.6
ENSG00000145050.15_MANF	4496.91	0.416531	0.0701266	5.93971	2.85534e-09	1.15811e-07	3477.51	3931.65	5117.81	5118.19	4839.41
ENSG00000115738.9_ID2	1268.18	0.514334	0.0866234	5.9376	2.89232e-09	1.17009e-07	976.662	998.208	1563.72	1355.24	1447.06
ENSG00000125430.8_HS3ST3B1	1575.19	0.456325	0.0769649	5.929	3.04785e-09	1.22985e-07	1231.4	1306.42	1839.37	1707.79	1790.94
ENSG00000092820.17_EZR	49348.4	-0.305106	0.051543	-5.91945	3.23025e-09	1.29692e-07	55483.7	56315.5	45323.5	46316.8	43302.7
ENSG00000143702.15_CEP170	9314.31	0.547183	0.0924384	5.91943	3.23055e-09	1.29692e-07	7221.38	6982.81	10553.8	9340.5	12473.1
ENSG00000171604.11_CXXC5	4435.28	-0.411015	0.0695478	-5.90982	3.42485e-09	1.37142e-07	5435.06	5070.8	3862.17	4130.02	3678.36
ENSG00000120742.10_SERP1	5043.37	0.324944	0.0550341	5.90442	3.53885e-09	1.41348e-07	4404.49	4314.98	5513.04	5518.44	5465.9
ENSG00000164463.12_CREBRF	573.788	0.628318	0.106464	5.90172	3.59732e-09	1.43319e-07	391.088	433.667	651.634	660.512	732.04
ENSG00000136010.13_ALDH1L2	193.388	0.841201	0.142596	5.89921	3.65253e-09	1.45151e-07	113.098	107.642	247.276	220.862	278.062
ENSG00000205189.11_ZBTB10	649.533	0.623663	0.106425	5.86011	4.62555e-09	1.83356e-07	483.046	455.35	829.997	691.62	787.652
ENSG00000136152.14_COG3	1129.31	0.515319	0.0879861	5.85682	4.71815e-09	1.86557e-07	938.61	820.095	1273.88	1282.66	1331.29
ENSG00000196396.9_PTPN1	6842.86	-0.306573	0.052392	-5.85153	4.87078e-09	1.92109e-07	7717.11	7795.16	6196.09	6194.51	6311.43
ENSG00000144136.10_SLC20A1	9383.53	0.419854	0.0718309	5.84504	5.06457e-09	1.99253e-07	7843.95	7589.17	10478.8	9638.09	11367.6
ENSG00000162512.15_SDC3	2529.31	-0.424897	0.0727117	-5.84359	5.10889e-09	2.00495e-07	3037.8	2989.98	2163.67	2360.01	2095.11
ENSG00000070808.15_CAMK2A	634.006	-0.573256	0.0984456	-5.82307	5.77749e-09	2.2617e-07	771.605	843.327	514.821	509.123	531.155
ENSG00000152439.12_ZNF773	338.981	0.762466	0.130983	5.8211	5.84623e-09	2.28293e-07	189.202	238.517	375.982	429.281	461.923
ENSG00000147883.10_CDKN2B	1765.95	0.445803	0.0766819	5.81367	6.11175e-09	2.38071e-07	1392.06	1469.05	1962	2097.67	1908.98
ENSG00000126001.15_CEP250	3602.44	-0.402542	0.0692534	-5.8126	6.15112e-09	2.39013e-07	4069.43	4431.14	3045.35	3320.19	3146.07
ENSG00000134531.9_EMP1	1322.38	0.53379	0.0921502	5.79261	6.93026e-09	2.67964e-07	1031.63	999.757	1508.99	1388.42	1683.12
ENSG00000180914.10_OXTR	15812.8	-0.315654	0.0544906	-5.79282	6.92135e-09	2.67964e-07	18632.7	17356	14411.9	14138.3	14525
ENSG00000117143.13_UAP1	7898.93	0.34204	0.0591506	5.78252	7.35908e-09	2.83848e-07	6648.49	6885.23	9034.7	8599.1	8327.1
ENSG00000143751.9_SDE2	1557.02	0.53743	0.0930282	5.77707	7.60145e-09	2.92479e-07	1213.43	1172.45	1838.36	1590.62	1970.27
ENSG00000121966.6_CXCR4	91.2686	0.907777	0.157581	5.7607	8.37637e-09	3.2151e-07	38.0518	42.5923	135.799	127.54	112.36
ENSG00000171368.11_TPPP	1165.05	-0.569954	0.0991574	-5.74797	9.03227e-09	3.45842e-07	1405.8	1561.2	1029.64	994.398	834.185
ENSG00000204525.14_HLA-C	2400.46	0.487982	0.0849175	5.74655	9.10837e-09	3.47909e-07	1876.16	1917.43	2675.45	3032.97	2500.29
ENSG00000196159.11_FAT4	1179.42	-0.486007	0.0846714	-5.73992	9.47228e-09	3.60933e-07	1515.73	1373.79	993.159	973.66	1040.75
ENSG00000153786.12_ZDHHC7	4167.43	-0.329653	0.0574661	-5.73647	9.66693e-09	3.6695e-07	4735.33	4804.41	3732.45	3835.53	3729.43
ENSG00000169252.5_ADRB2	437.012	0.625732	0.109083	5.7363	9.67682e-09	3.6695e-07	309.699	318.28	527.996	519.493	509.591
ENSG00000010379.15_SLC6A13	37.1985	0.867549	0.151269	5.73514	9.74309e-09	3.68575e-07	3.17098	8.51845	57.7654	51.8456	64.6919
ENSG00000123700.4_KCNJ2	682.923	0.716179	0.124889	5.73454	9.77773e-09	3.68998e-07	490.445	415.855	850.265	685.398	972.648
ENSG00000143384.12_MCL1	7576.72	0.364758	0.0636462	5.73103	9.98249e-09	3.75824e-07	6316.59	6511.2	8289.84	7916.82	8849.17
ENSG00000131016.16_AKAP12	8709.84	0.340409	0.0594195	5.72891	1.01076e-08	3.79624e-07	7383.1	7549.67	9369.14	9209.85	10037.5
ENSG00000024422.11_EHD2	11682.8	-0.319864	0.0558412	-5.7281	1.01562e-08	3.80545e-07	13196.6	13439	10290.3	11063.8	10424.5
ENSG00000185404.16_SP140L	644.417	0.559602	0.0978734	5.71761	1.08032e-08	4.03824e-07	483.046	488.649	726.627	737.244	786.517
ENSG00000107290.13_SETX	4735.31	0.435612	0.0762403	5.71367	1.10562e-08	4.12303e-07	3871.77	3842.6	5211.04	4911.85	5839.3
ENSG00000243710.7_CFAP57	96.1443	0.896733	0.157021	5.71093	1.1236e-08	4.18015e-07	40.1658	47.2387	124.652	123.392	145.273
ENSG00000163874.8_ZC3H12A	627.788	0.62931	0.110358	5.70243	1.18113e-08	4.38383e-07	454.507	445.283	793.514	795.311	650.324
ENSG00000163659.12_TIPARP	4494.52	0.358396	0.0628959	5.69825	1.21042e-08	4.48198e-07	3885.51	3750.44	4960.73	4733.5	5142.44
ENSG00000156273.15_BACH1	1887.24	0.474067	0.0832447	5.69486	1.23475e-08	4.56133e-07	1543.21	1463.63	2118.06	1984.65	2326.64
ENSG00000182179.10_UBA7	141.363	0.859507	0.151156	5.68624	1.29869e-08	4.78629e-07	75.0466	73.5685	172.283	215.678	170.242
ENSG00000146122.16_DAAM2	2661.35	-0.41809	0.0735851	-5.68172	1.33346e-08	4.90296e-07	3074.79	3250.95	2279.2	2487.55	2214.28
ENSG00000156453.13_PCDH1	162.675	0.848908	0.149542	5.67672	1.37301e-08	5.0366e-07	81.3885	93.703	232.075	229.157	177.052
ENSG00000100911.13_PSME2	1825.72	0.420765	0.0741688	5.67307	1.40259e-08	5.13314e-07	1521.01	1479.11	2073.47	2114.26	1940.76
ENSG00000183876.8_ARSI	5748.33	-0.494083	0.0871583	-5.6688	1.43803e-08	5.2385e-07	6964.53	7171.76	5184.69	5239.51	4181.14
ENSG00000187498.14_COL4A1	17077.3	-0.398712	0.0703297	-5.66919	1.43473e-08	5.2385e-07	19798.5	20460.6	15796.3	15704	13627.3
ENSG00000099860.8_GADD45B	2238.72	0.428924	0.0757804	5.66009	1.51292e-08	5.49857e-07	1792.66	1867.09	2502.15	2672.12	2359.55
ENSG00000179532.12_DNHD1	378.749	0.657335	0.116336	5.65033	1.6014e-08	5.80673e-07	274.818	254.779	431.72	461.425	471.002
ENSG00000137497.17_NUMA1	8684.47	-0.320103	0.056801	-5.63552	1.74532e-08	6.31406e-07	10007.6	9798.54	7771.97	8207.15	7637.05
ENSG00000120889.12_TNFRSF10B	6816.47	0.357207	0.0634444	5.63024	1.79961e-08	6.49553e-07	5787.04	5797.19	7723.33	7021.96	7752.81
ENSG00000182393.2_IFNL1	24.2924	0.779148	0.138663	5.61901	1.92055e-08	6.91618e-07	0	0	35.47	50.8086	35.1833
ENSG00000167106.11_FAM102A	1793.55	-0.42715	0.0763398	-5.59538	2.2014e-08	7.90945e-07	2144.64	2138.13	1615.4	1613.43	1456.14
ENSG00000168477.17_TNXB	38.1135	0.863221	0.154323	5.59361	2.22397e-08	7.97236e-07	8.45595	8.51845	58.7788	58.067	56.7473
ENSG00000102554.13_KLF5	1423.79	0.44534	0.0797032	5.58748	2.30391e-08	8.24014e-07	1097.16	1205.75	1560.68	1628.99	1626.38
ENSG00000251201.8_TMED7-TICAM2	954.818	0.512108	0.0917982	5.57863	2.42423e-08	8.65081e-07	793.802	692.318	1110.72	1063.87	1113.38
ENSG00000163947.11_ARHGEF3	966.544	-0.473296	0.0849077	-5.57424	2.48611e-08	8.85156e-07	1166.92	1188.71	857.359	802.569	817.161
ENSG00000048405.9_ZNF800	1067.27	0.542404	0.0973263	5.57304	2.50326e-08	8.8925e-07	819.17	806.155	1138.08	1188.3	1384.63
ENSG00000144824.19_PHLDB2	3693.8	-0.335657	0.0602384	-5.57216	2.51606e-08	8.91784e-07	4322.05	4158.55	3260.2	3358.56	3369.65
ENSG00000104833.10_TUBB4A	2706.01	-0.396079	0.0710905	-5.57147	2.52592e-08	8.93268e-07	3021.95	3349.3	2320.75	2427.41	2410.62
ENSG00000142798.16_HSPG2	25675.5	-0.308186	0.0553475	-5.5682	2.57391e-08	9.08197e-07	28771.4	29497.1	24295.9	23479.8	22333.5
ENSG00000107796.12_ACTA2	2690.87	-0.585394	0.105291	-5.55977	2.70124e-08	9.50994e-07	3269.28	3652.09	2343.04	2416	1773.92
ENSG00000145780.7_FEM1C	1304.71	0.435172	0.0782811	5.55909	2.71184e-08	9.52593e-07	1043.25	1080.29	1494.81	1419.53	1485.64
ENSG00000204262.11_COL5A2	4553.14	-0.354266	0.0637354	-5.55839	2.72278e-08	9.54306e-07	5148.62	5385.99	4157.08	4201.56	3872.43
ENSG00000186832.8_KRT16	186.092	-0.788725	0.14198	-5.5552	2.77292e-08	9.6972e-07	254.735	289.627	138.84	133.762	113.495
ENSG00000163660.11_CCNL1	3409.05	0.414581	0.0747145	5.54887	2.87528e-08	1.00329e-06	2851.77	2763.85	3679.75	3608.45	4141.42
ENSG00000004139.13_SARM1	2493.3	-0.479533	0.0865323	-5.54167	2.99609e-08	1.04313e-06	3120.25	2976.81	2139.34	2339.27	1890.82
ENSG00000130702.13_LAMA5	5121.3	-0.443619	0.0801345	-5.53593	3.09573e-08	1.07544e-06	6187.64	6132.51	4391.18	4903.55	3991.6
ENSG00000246430.6_LINC00968	718.444	-0.58287	0.105586	-5.52034	3.38344e-08	1.1728e-06	933.325	913.798	553.331	659.476	532.289
ENSG00000119537.15_KDSR	2632.53	0.368771	0.0669146	5.51108	3.56647e-08	1.23353e-06	2214.4	2230.29	2916.64	2790.33	3011.01
ENSG00000170006.11_TMEM154	511.447	0.58657	0.106447	5.51044	3.57929e-08	1.23525e-06	374.176	379.458	601.976	567.19	634.435
ENSG00000164484.11_TMEM200A	1116.45	0.565932	0.102802	5.50507	3.69029e-08	1.27077e-06	811.771	858.041	1271.85	1157.19	1483.37
ENSG00000143816.7_WNT9A	650.601	-0.563345	0.102405	-5.50116	3.77293e-08	1.29562e-06	849.823	806.93	501.647	582.744	511.86
ENSG00000186174.12_BCL9L	7566.77	-0.337473	0.0613488	-5.50088	3.77893e-08	1.29562e-06	8621.9	8764.71	6832.53	7155.72	6458.98
ENSG00000100345.20_MYH9	172103	-0.276212	0.0502689	-5.49469	3.91388e-08	1.33897e-06	188275	197181	159484	161410	154165
ENSG00000198900.5_TOP1	7777.11	0.37364	0.0681327	5.484	4.15815e-08	1.41946e-06	6574.5	6522.04	8164.17	8316.03	9308.82
ENSG00000125965.8_GDF5	870.954	-0.693252	0.126689	-5.47207	4.44818e-08	1.51517e-06	1196.52	1189.49	695.211	778.72	494.836
ENSG00000154016.13_GRAP	26.2983	0.785273	0.143623	5.4676	4.5617e-08	1.55048e-06	1.05699	3.09762	39.5237	43.5503	44.2629
ENSG00000175928.5_LRRN1	5837.84	-0.406361	0.0743508	-5.46546	4.61716e-08	1.56596e-06	7429.61	6390.39	4954.65	5050.79	5363.75
ENSG00000139192.11_TAPBPL	87.9462	0.861976	0.157938	5.45769	4.82369e-08	1.63074e-06	41.2228	39.4946	105.396	126.503	127.114
ENSG00000182197.10_EXT1	10566.8	-0.288957	0.0529468	-5.4575	4.8289e-08	1.63074e-06	11614.2	12176.7	9680.26	9825.77	9536.95
ENSG00000106546.12_AHR	2560.17	0.383154	0.0702719	5.45246	4.96791e-08	1.67409e-06	2167.89	2121.09	2727.13	2786.18	2998.53
ENSG00000096717.11_SIRT1	1201.89	0.432462	0.0794067	5.44617	5.14668e-08	1.73063e-06	958.693	998.982	1323.54	1358.35	1369.88
ENSG00000101224.17_CDC25B	3211.24	-0.396186	0.0728243	-5.4403	5.31918e-08	1.78482e-06	3853.8	3715.59	2838.61	3017.41	2630.8
ENSG00000179454.13_KLHL28	503.27	0.609889	0.11217	5.43719	5.41287e-08	1.81239e-06	371.005	356.226	563.466	565.117	660.538
ENSG00000178252.17_WDR6	5400.72	-0.377237	0.0694463	-5.43207	5.57025e-08	1.86113e-06	6218.29	6405.88	5009.37	4958.51	4411.53
ENSG00000119280.16_C1orf198	4664.55	-0.310588	0.0571963	-5.43022	5.62857e-08	1.87663e-06	5263.83	5334.88	4318.21	4268.96	4136.88
ENSG00000117000.8_RLF	767.115	0.497294	0.09176	5.41951	5.9763e-08	1.98835e-06	611.999	590.097	888.776	849.23	895.472
ENSG00000130449.5_ZSWIM6	1664.35	0.445304	0.0822232	5.4158	6.10168e-08	2.02578e-06	1340.27	1350.56	1833.29	1763.79	2033.82
ENSG00000081320.10_STK17B	1224.47	0.442987	0.0818968	5.40908	6.33486e-08	2.09877e-06	984.061	998.208	1391.44	1310.66	1437.98
ENSG00000107554.15_DNMBP	2766.8	0.414094	0.0766641	5.40141	6.61202e-08	2.18141e-06	2278.88	2275.98	3068.66	2868.1	3342.41
ENSG00000277462.1_ZNF670	209.346	0.744445	0.137816	5.40174	6.59958e-08	2.18141e-06	136.352	126.228	282.746	242.637	258.768
ENSG00000174574.15_AKIRIN1	4879.51	0.324214	0.0600489	5.39917	6.69481e-08	2.20411e-06	4286.11	4144.61	5316.44	5149.3	5501.08
ENSG00000101670.11_LIPG	1113.96	0.476507	0.0882691	5.39834	6.72591e-08	2.20972e-06	836.082	929.286	1220.17	1248.44	1335.83
ENSG00000142871.15_CYR61	18628.5	-0.260793	0.0483327	-5.3958	6.82204e-08	2.23663e-06	20697	20764.1	17539.4	16967	17175.1
ENSG00000158966.13_CACHD1	678.593	0.576483	0.106856	5.39497	6.85367e-08	2.24233e-06	474.59	529.693	832.024	713.395	843.265
ENSG00000197415.11_VEPH1	620.692	0.557639	0.103558	5.38479	7.25276e-08	2.36798e-06	469.305	463.094	704.332	680.214	786.517
ENSG00000085465.12_OVGP1	75.0699	0.855405	0.159323	5.369	7.91736e-08	2.57962e-06	38.0518	25.5554	100.329	104.728	106.685
ENSG00000154447.14_SH3RF1	3351.76	0.401597	0.0748809	5.36314	8.17874e-08	2.65927e-06	2746.07	2809.54	3913.86	3413.51	3875.84
ENSG00000158258.15_CLSTN2	7116.85	-0.329678	0.0614916	-5.36135	8.26027e-08	2.68025e-06	8269.92	8033.68	6077.52	6682.89	6520.26
ENSG00000115419.12_GLS	13471	-0.37298	0.0696896	-5.35202	8.69769e-08	2.81637e-06	15926.8	15509	11510.5	11315.8	13092.7
ENSG00000173812.10_EIF1	12734.2	0.264594	0.0494601	5.34964	8.81273e-08	2.84776e-06	11261.2	11394.6	13847.5	13703.8	13463.9
ENSG00000153071.14_DAB2	15924.4	-0.288205	0.0539398	-5.34308	9.1381e-08	2.94685e-06	17841	18008	14621.7	14043.9	15107.3
ENSG00000146457.14_WTAP	3948.45	0.319271	0.0598154	5.33761	9.41807e-08	3.03092e-06	3432.06	3405.83	4402.33	4175.64	4326.41
ENSG00000072849.10_DERL2	2168.77	0.377211	0.070813	5.32685	9.99289e-08	3.20935e-06	1848.68	1795.07	2424.12	2291.57	2484.4
ENSG00000127947.15_PTPN12	3431.03	0.368293	0.069157	5.32547	1.00692e-07	3.22728e-06	2993.41	2799.47	3759.82	3618.82	3983.66
ENSG00000171617.13_ENC1	6889.04	0.316651	0.0594668	5.32483	1.01047e-07	3.23207e-06	5902.25	6041.91	7707.11	7143.28	7650.67
ENSG00000008405.11_CRY1	1646.99	0.386034	0.0725935	5.31775	1.05059e-07	3.35357e-06	1414.26	1340.49	1819.1	1827.04	1834.07
ENSG00000227051.5_C14orf132	1358.26	-0.426389	0.0801982	-5.3167	1.05668e-07	3.3662e-06	1553.78	1690.53	1173.55	1221.48	1151.97
ENSG00000159399.9_HK2	1925.6	0.406142	0.0764466	5.31275	1.07983e-07	3.4321e-06	1603.46	1579.79	2191.03	2005.39	2248.33
ENSG00000171132.13_PRKCE	337.686	0.633007	0.119156	5.31243	1.08173e-07	3.4321e-06	230.425	245.486	409.425	388.842	414.255
ENSG00000140465.13_CYP1A1	33.807	0.798581	0.150408	5.30943	1.09967e-07	3.48064e-06	4.22797	8.51845	55.7385	52.8825	47.6677
ENSG00000164283.12_ESM1	29.2947	0.750103	0.141285	5.30914	1.10145e-07	3.48064e-06	1.05699	3.09762	46.6177	32.1442	63.557
ENSG00000211448.11_DIO2	461.154	-0.585289	0.110265	-5.30803	1.10817e-07	3.49484e-06	605.657	584.676	354.7	356.697	404.041
ENSG00000155096.13_AZIN1	5714.53	0.293434	0.0553144	5.30484	1.1277e-07	3.54932e-06	5086.25	4939.15	6195.08	6080.45	6271.71
ENSG00000095752.6_IL11	1706.63	0.55945	0.105569	5.29936	1.16207e-07	3.6502e-06	1151.07	1404	2220.42	2030.27	1727.39
ENSG00000143479.15_DYRK3	881.192	0.520315	0.0983933	5.28812	1.23581e-07	3.8741e-06	721.927	637.335	1088.42	1015.14	943.14
ENSG00000251369.8_ZNF550	436.267	0.611988	0.115791	5.28528	1.25512e-07	3.92682e-06	334.01	293.499	531.036	478.016	544.774
ENSG00000174749.5_C4orf32	185.004	0.747273	0.141431	5.28367	1.26622e-07	3.95367e-06	124.725	103.77	240.182	227.084	229.259
ENSG00000122861.15_PLAU	4410.89	0.31682	0.0601545	5.26677	1.38848e-07	4.32684e-06	3828.43	3817.82	4786.42	4648.47	4973.33
ENSG00000181026.14_AEN	2478.34	0.374985	0.0712153	5.26551	1.39798e-07	4.34783e-06	2105.53	2063.01	2870.03	2765.44	2587.68
ENSG00000180340.6_FZD2	3463.31	-0.401721	0.0763668	-5.26042	1.43729e-07	4.46128e-06	4031.37	4156.23	3087.91	3268.34	2772.67
ENSG00000163162.8_RNF149	1635.86	0.381551	0.0726273	5.25355	1.49198e-07	4.6219e-06	1350.84	1389.28	1858.63	1790.75	1789.81
ENSG00000115844.10_DLX2	82.7752	0.831762	0.158378	5.25175	1.50662e-07	4.65811e-06	39.1088	37.9458	121.611	100.58	114.63
ENSG00000165806.19_CASP7	546.709	0.607856	0.115778	5.25017	1.51958e-07	4.67977e-06	372.062	414.307	627.311	733.096	586.767
ENSG00000196141.12_SPATS2L	4126.31	0.326515	0.0621911	5.25019	1.51944e-07	4.67977e-06	3622.32	3497.21	4490.5	4671.29	4350.25
ENSG00000197536.10_C5orf56	161.264	0.775724	0.147902	5.24484	1.56415e-07	4.80762e-06	89.8445	96.8006	185.457	197.013	237.204
ENSG00000159167.11_STC1	1474.51	0.50589	0.0966708	5.23312	1.6667e-07	5.11284e-06	1142.61	1148.44	1741.07	1473.45	1866.99
ENSG00000171606.17_ZNF274	918.847	0.450859	0.0861636	5.23259	1.67152e-07	5.11764e-06	738.839	740.331	1064.1	1043.13	1007.83
ENSG00000169155.9_ZBTB43	986.548	0.451333	0.0862742	5.23138	1.68252e-07	5.14134e-06	813.885	774.405	1138.08	1068.02	1138.35
ENSG00000120690.13_ELF1	1142.04	0.43951	0.0842694	5.21554	1.83285e-07	5.58985e-06	900.559	948.646	1226.25	1290.95	1343.78
ENSG00000163462.17_TRIM46	913.672	-0.486666	0.0934339	-5.20866	1.90209e-07	5.78978e-06	1126.76	1120.56	782.366	831.603	707.071
ENSG00000253719.3_ATXN7L3B	2645.5	-0.328566	0.0630917	-5.20774	1.9115e-07	5.80719e-06	3032.52	3027.15	2381.55	2434.67	2351.61
ENSG00000125459.14_MSTO1	1488.47	0.4172	0.0802144	5.20107	1.98148e-07	5.9879e-06	1229.28	1215.04	1691.41	1747.2	1559.42
ENSG00000129116.17_PALLD	13739.1	-0.27959	0.0537571	-5.20098	1.9824e-07	5.9879e-06	15870.8	14957.6	12766.1	12733.3	12367.5
ENSG00000147130.14_ZMYM3	2258.28	-0.35959	0.0691345	-5.20131	1.97885e-07	5.9879e-06	2713.3	2530.76	2028.88	2044.79	1973.67
ENSG00000099337.4_KCNK6	1364.22	-0.441306	0.0849496	-5.19492	2.04806e-07	6.16341e-06	1690.13	1595.27	1141.12	1274.36	1120.19
ENSG00000132613.14_MTSS1L	3818.24	-0.456127	0.0878029	-5.1949	2.04833e-07	6.16341e-06	4505.96	4749.43	3345.32	3628.15	2862.33
ENSG00000086061.15_DNAJA1	12448.1	0.278748	0.0536676	5.19398	2.05849e-07	6.18216e-06	11217.9	10774.3	13177.6	13250.7	13820.2
ENSG00000163249.9_CCNYL1	1323.61	0.413138	0.0797021	5.18352	2.17731e-07	6.52655e-06	1079.19	1098.11	1524.19	1407.09	1509.48
ENSG00000187189.10_TSPYL4	1579.31	-0.410071	0.0791294	-5.18229	2.19178e-07	6.55743e-06	1892.02	1857.8	1427.92	1434.05	1284.76
ENSG00000183508.4_FAM46C	61.3072	0.825887	0.15944	5.17993	2.21971e-07	6.62838e-06	25.3678	24.0066	93.2353	78.8053	85.1209
ENSG00000134243.11_SORT1	18236.7	-0.267486	0.051643	-5.17952	2.22456e-07	6.63029e-06	20745.6	19967.3	17110.7	16379	16981.1
ENSG00000158220.13_ESYT3	186.318	-0.735	0.142014	-5.17554	2.27251e-07	6.76038e-06	281.16	252.456	119.584	128.577	149.813
ENSG00000197256.10_KANK2	2720.18	-0.402387	0.0778085	-5.17151	2.32216e-07	6.89505e-06	3334.82	3102.27	2426.14	2540.43	2197.25
ENSG00000157514.16_TSC22D3	724.819	0.513707	0.0995762	5.15893	2.48361e-07	7.36055e-06	526.383	591.645	885.735	820.197	800.137
ENSG00000166900.14_STX3	3311.87	-0.329617	0.0639526	-5.15408	2.54874e-07	7.53938e-06	3840.06	3751.22	3118.32	2938.61	2911.14
ENSG00000155287.10_SLC25A28	592.357	0.531938	0.103278	5.15057	2.59696e-07	7.66761e-06	455.564	447.606	650.62	737.244	670.753
ENSG00000120053.10_GOT1	1817.59	0.390624	0.0759242	5.14492	2.67636e-07	7.88726e-06	1538.98	1490.73	2085.63	2073.82	1898.76
ENSG00000019144.16_PHLDB1	7630.91	-0.319309	0.0622087	-5.13286	2.85373e-07	8.39422e-06	8719.14	8694.24	7056.49	7196.16	6488.48
ENSG00000234616.8_JRK	1130.74	-0.435671	0.085061	-5.12187	3.02522e-07	8.88207e-06	1362.46	1354.43	986.065	1034.84	915.901
ENSG00000065060.16_UHRF1BP1	1762.05	0.389851	0.0761688	5.11825	3.08379e-07	9.03716e-06	1519.96	1417.94	1894.1	1929.69	2048.58
ENSG00000108679.12_LGALS3BP	11908.6	0.38106	0.0744742	5.11668	3.10967e-07	9.09608e-06	10030.9	9914.71	13234.3	14411	11952.1
ENSG00000204138.12_PHACTR4	2285.34	0.382345	0.0748043	5.11127	3.2e-07	9.34294e-06	1892.02	1931.37	2450.47	2434.67	2718.19
ENSG00000223547.9_ZNF844	354.472	0.610973	0.119605	5.10826	3.25132e-07	9.4752e-06	243.109	262.523	402.331	412.691	451.708
ENSG00000082258.12_CCNT2	1656.65	0.417832	0.081822	5.1066	3.28009e-07	9.54137e-06	1413.2	1304.87	1743.09	1852.96	1969.13
ENSG00000108175.16_ZMIZ1	5999.3	-0.282834	0.0554413	-5.10149	3.36984e-07	9.78436e-06	6640.03	6839.54	5533.31	5598.28	5385.32
ENSG00000153976.2_HS3ST3A1	959.157	0.48205	0.0945081	5.10062	3.38546e-07	9.81159e-06	725.098	786.021	1160.37	1119.86	1004.43
ENSG00000102218.5_RP2	1480.34	0.429039	0.0843619	5.0857	3.66282e-07	1.05858e-05	1201.8	1208.85	1585	1595.81	1810.24
ENSG00000165194.14_PCDH19	389.601	0.626729	0.123238	5.08553	3.66605e-07	1.05858e-05	254.735	291.951	449.962	429.281	522.075
ENSG00000102996.4_MMP15	4411.23	-0.448336	0.0883673	-5.07355	3.90459e-07	1.1254e-05	5190.9	5471.94	3982.77	4136.24	3274.32
ENSG00000185585.19_OLFML2A	507.945	-0.533874	0.105321	-5.06903	3.99842e-07	1.15033e-05	644.766	635.786	392.196	433.429	433.549
ENSG00000036672.15_USP2	767.238	-0.507447	0.100154	-5.06667	4.04842e-07	1.16259e-05	986.175	923.091	696.225	583.781	646.919
ENSG00000159256.12_MORC3	1336.02	0.426302	0.0841539	5.06575	4.06806e-07	1.1661e-05	1118.3	1061.71	1422.85	1472.41	1604.81
ENSG00000088367.20_EPB41L1	2417.92	-0.326577	0.0646262	-5.05332	4.34194e-07	1.24235e-05	2794.69	2741.39	2170.76	2225.21	2157.53
ENSG00000121073.13_SLC35B1	1980.46	0.388386	0.0769082	5.05	4.41814e-07	1.26186e-05	1676.39	1627.02	2357.23	2132.93	2108.73
ENSG00000166068.12_SPRED1	2353.59	0.339239	0.0673052	5.04032	4.64761e-07	1.32499e-05	1997.72	2032.04	2596.4	2491.7	2650.1
ENSG00000172071.11_EIF2AK3	893.019	0.503855	0.100136	5.03173	4.86074e-07	1.38324e-05	737.782	649.726	1112.74	945.663	1019.18
ENSG00000197748.12_CFAP43	37.3041	0.771141	0.15333	5.02929	4.92287e-07	1.3984e-05	10.5699	9.29286	55.7385	63.2516	47.6677
ENSG00000179833.4_SERTAD2	3001.11	0.351878	0.0700056	5.02642	4.99712e-07	1.41693e-05	2526.22	2577.22	3194.32	3190.58	3517.2
ENSG00000170412.16_GPRC5C	1717.84	-0.429141	0.0854099	-5.02449	5.04776e-07	1.42872e-05	2081.22	2036.68	1572.84	1562.63	1335.83
ENSG00000143126.7_CELSR2	1708.41	-0.383506	0.0763384	-5.02377	5.06671e-07	1.43151e-05	2026.26	1984.8	1603.24	1480.71	1447.06
ENSG00000187735.12_TCEA1	4470.45	0.289686	0.0577345	5.01755	5.23341e-07	1.47595e-05	3924.62	3927.78	4737.77	4953.32	4808.76
ENSG00000164105.3_SAP30	1308.51	-0.54918	0.10961	-5.01032	5.43407e-07	1.5298e-05	1643.63	1685.88	1063.09	1256.74	893.202
ENSG00000166446.14_CDYL2	1067.42	0.443277	0.0885835	5.00406	5.61362e-07	1.57753e-05	833.968	887.468	1246.52	1122.97	1246.17
ENSG00000033100.14_CHPF2	5675.65	-0.317224	0.0634023	-5.00335	5.63427e-07	1.58051e-05	6307.08	6635.1	5373.19	5169	4893.89
ENSG00000167552.13_TUBA1A	30544.7	-0.303705	0.0607578	-4.99861	5.77451e-07	1.61697e-05	35500.2	33756.3	28534.1	28832.4	26100.3
ENSG00000162522.10_KIAA1522	2319.87	-0.424972	0.0850356	-4.99758	5.8054e-07	1.62273e-05	2727.04	2822.71	2013.68	2220.03	1815.91
ENSG00000139645.9_ANKRD52	5998.34	-0.269999	0.0540492	-4.99542	5.87065e-07	1.63668e-05	6614.67	6791.53	5494.8	5497.7	5593.01
ENSG00000151702.16_FLI1	868.152	0.44067	0.088218	4.99525	5.8761e-07	1.63668e-05	689.16	713.227	964.783	961.217	1012.37
ENSG00000114861.18_FOXP1	2462.36	0.343686	0.0688178	4.99414	5.90974e-07	1.64314e-05	2129.84	2076.95	2756.52	2574.65	2773.81
ENSG00000175895.3_PLEKHF2	506.159	0.523874	0.105	4.98927	6.06084e-07	1.68218e-05	392.145	381.782	588.801	562.006	606.061
ENSG00000107864.14_CPEB3	116.939	0.780503	0.156965	4.97246	6.61092e-07	1.83162e-05	75.0466	46.4643	169.242	144.131	149.813
ENSG00000196535.14_MYO18A	2394.04	-0.341985	0.0687877	-4.97159	6.64052e-07	1.83659e-05	2760.87	2757.66	2070.43	2253.21	2128.02
ENSG00000150593.15_PDCD4	2358.77	-0.332146	0.0668698	-4.96705	6.79781e-07	1.87679e-05	2669.97	2742.94	2056.24	2154.7	2170.02
ENSG00000121931.15_LRIF1	697.726	0.498827	0.100438	4.96651	6.81679e-07	1.87874e-05	557.036	528.919	840.131	735.17	827.375
ENSG00000164741.14_DLC1	8760.92	0.292864	0.0589987	4.9639	6.90911e-07	1.90085e-05	7766.79	7596.14	9573.85	9022.16	9845.65
ENSG00000154781.15_CCDC174	598.098	0.511583	0.103172	4.95853	7.10298e-07	1.95078e-05	430.196	490.198	704.332	667.771	697.992
ENSG00000143786.7_CNIH3	485.182	0.575218	0.116018	4.95799	7.12272e-07	1.95279e-05	358.321	353.129	506.714	574.449	633.3
ENSG00000103489.11_XYLT1	1828.74	0.447603	0.0903579	4.95367	7.28281e-07	1.99321e-05	1424.83	1515.51	2057.26	1859.18	2286.92
ENSG00000204592.8_HLA-E	5056.14	0.330462	0.066802	4.94689	7.54093e-07	2.06027e-05	4207.89	4486.13	5243.47	5816.04	5527.19
ENSG00000196843.15_ARID5A	717.37	0.551907	0.111738	4.93928	7.84112e-07	2.13857e-05	489.388	581.578	904.991	872.042	738.85
ENSG00000196517.11_SLC6A9	236.154	0.702249	0.142257	4.93647	7.95473e-07	2.16581e-05	123.668	174.241	322.27	276.855	283.736
ENSG00000167693.16_NXN	3709.01	-0.381528	0.077298	-4.93581	7.98185e-07	2.16944e-05	4388.64	4314.21	3380.79	3503.72	2957.67
ENSG00000075275.16_CELSR1	2960.69	-0.354584	0.0718471	-4.93527	8.00414e-07	2.17174e-05	3440.51	3423.64	2651.13	2816.25	2471.91
ENSG00000152894.14_PTPRK	4492.58	0.354544	0.0719	4.93107	8.17786e-07	2.21506e-05	3946.81	3682.3	4925.26	4628.77	5279.77
ENSG00000137200.12_CMTR1	2165.03	0.326395	0.066199	4.93051	8.2014e-07	2.21762e-05	1847.63	1883.35	2386.62	2367.27	2340.26
ENSG00000171587.14_DSCAM	366.341	0.626947	0.127307	4.92469	8.44945e-07	2.28077e-05	268.476	243.163	478.338	376.399	465.328
ENSG00000186376.14_ZNF75D	443.466	0.534861	0.10885	4.91373	8.93599e-07	2.40797e-05	346.694	325.25	520.902	508.086	516.4
ENSG00000131015.4_ULBP2	263.619	0.65435	0.133313	4.90838	9.18328e-07	2.47038e-05	175.461	180.436	329.364	281.003	351.833
ENSG00000138411.10_HECW2	325.234	0.610198	0.124398	4.9052	9.3333e-07	2.50464e-05	233.596	227.675	419.559	351.513	393.826
ENSG00000165195.13_PIGA	373.113	0.599986	0.122321	4.90501	9.34246e-07	2.50464e-05	236.767	295.823	451.989	429.281	451.708
ENSG00000012171.17_SEMA3B	1319.45	-0.495402	0.101023	-4.90387	9.39681e-07	2.51492e-05	1584.43	1683.56	1028.63	1283.7	1016.91
ENSG00000151883.16_PARP8	597.508	0.487776	0.0994783	4.90334	9.42201e-07	2.51739e-05	480.932	455.35	662.781	691.62	696.857
ENSG00000113407.13_TARS	7934.96	0.274686	0.0560334	4.90218	9.47784e-07	2.52801e-05	7082.92	6956.48	8553.33	8259	8823.07
ENSG00000104081.13_BMF	230.64	-0.697255	0.142309	-4.89959	9.60354e-07	2.55721e-05	332.953	318.28	158.095	204.272	139.598
ENSG00000176903.4_PNMA1	2754.92	-0.33255	0.0678789	-4.89917	9.6244e-07	2.55843e-05	3167.81	3158.8	2538.64	2561.17	2348.2
ENSG00000172716.16_SLFN11	167.801	0.705823	0.144309	4.89107	1.0029e-06	2.66149e-05	108.87	101.447	230.048	201.161	197.481
ENSG00000172432.18_GTPBP2	1759.6	0.373782	0.0766061	4.87926	1.06482e-06	2.82105e-05	1495.65	1459.75	1907.27	1867.48	2067.87
ENSG00000177076.5_ACER2	84.5286	0.77561	0.159139	4.87379	1.0948e-06	2.89561e-05	49.6787	30.9762	111.477	106.802	123.709
ENSG00000167842.15_MIS12	731.429	0.477829	0.0981322	4.86924	1.12029e-06	2.95806e-05	568.663	583.901	828.984	895.891	779.708
ENSG00000163121.9_NEURL3	21.3621	0.645504	0.132796	4.86085	1.1688e-06	3.08098e-05	1.05699	0	44.5908	37.3288	23.8339
ENSG00000171320.14_ESCO2	739.898	0.544976	0.11218	4.85806	1.18543e-06	3.11958e-05	587.689	522.723	874.588	748.65	965.839
ENSG00000154640.14_BTG3	1270.71	0.385761	0.0795826	4.8473	1.25152e-06	3.28801e-05	1100.33	1020.67	1397.52	1405.01	1430.03
ENSG00000111859.16_NEDD9	2538.83	0.31234	0.0644498	4.84626	1.25811e-06	3.29433e-05	2215.46	2191.57	2806.18	2698.04	2782.89
ENSG00000164040.16_PGRMC2	4861.1	-0.277549	0.0572676	-4.84653	1.25641e-06	3.29433e-05	5407.58	5494.4	4361.79	4577.96	4463.74
ENSG00000122733.12_PHF24	18.9004	0.633779	0.130823	4.84455	1.26902e-06	3.31736e-05	0	0	35.47	23.849	35.1833
ENSG00000101782.14_RIOK3	2699.31	0.3096	0.0639167	4.84381	1.27375e-06	3.32421e-05	2353.93	2337.93	2954.14	2857.73	2992.85
ENSG00000023839.10_ABCC2	47.6609	0.761942	0.157473	4.83856	1.30784e-06	3.40754e-05	14.7979	19.3601	76.007	61.1778	66.9618
ENSG00000102081.13_FMR1	2004.94	0.371412	0.0768651	4.832	1.3517e-06	3.51018e-05	1651.02	1718.4	2101.85	2184.77	2368.63
ENSG00000165029.15_ABCA1	2838.5	0.336917	0.0697226	4.83225	1.35001e-06	3.51018e-05	2538.9	2327.09	3015.96	3214.42	3096.13
ENSG00000184156.15_KCNQ3	252.678	0.630943	0.130792	4.82401	1.40698e-06	3.64772e-05	182.86	166.497	312.136	284.114	317.785
ENSG00000168944.15_CEP120	971.2	0.487515	0.101359	4.80977	1.51101e-06	3.91099e-05	807.543	712.452	1065.11	1033.8	1237.09
ENSG00000086065.13_CHMP5	2779.61	0.32223	0.0671207	4.80075	1.58072e-06	4.0847e-05	2445.88	2354.19	2901.44	3111.77	3084.78
ENSG00000182158.14_CREB3L2	4935.77	0.315942	0.0658729	4.79623	1.61679e-06	4.17106e-05	4275.54	4273.94	5526.22	5024.87	5578.26
ENSG00000001630.15_CYP51A1	5362.78	0.267778	0.0558367	4.79574	1.62078e-06	4.1745e-05	4832.58	4687.47	5665.06	5808.78	5820
ENSG00000101310.14_SEC23B	3645.18	0.309625	0.0646059	4.79252	1.64697e-06	4.23504e-05	3255.54	3081.36	4094.25	3817.91	3976.85
ENSG00000049239.12_H6PD	2644.16	-0.325506	0.0679983	-4.78697	1.69315e-06	4.32745e-05	3077.97	2978.36	2454.52	2437.78	2272.16
ENSG00000155304.5_HSPA13	2390.9	0.340304	0.0710909	4.78688	1.69391e-06	4.32745e-05	2103.42	1986.35	2674.43	2494.81	2695.5
ENSG00000160712.12_IL6R	452.929	-0.513705	0.107303	-4.78743	1.68932e-06	4.32745e-05	566.549	567.639	375.982	362.919	391.556
ENSG00000176887.6_SOX11	2864.65	0.333252	0.0696158	4.78701	1.69287e-06	4.32745e-05	2348.64	2565.6	3188.24	3023.63	3197.14
ENSG00000162601.9_MYSM1	2342	0.388901	0.0812607	4.78584	1.70275e-06	4.34299e-05	1915.27	1980.93	2442.36	2511.4	2860.06
ENSG00000111266.8_DUSP16	1546.17	0.367147	0.0767263	4.78515	1.70857e-06	4.35077e-05	1244.08	1359.08	1727.89	1686.02	1713.77
ENSG00000172346.14_CSDC2	313.944	-0.66843	0.139787	-4.78178	1.73751e-06	4.41733e-05	414.342	456.124	245.249	275.818	178.186
ENSG00000186340.14_THBS2	750.159	-0.436233	0.0912549	-4.78038	1.74968e-06	4.44109e-05	914.3	892.889	641.499	668.808	633.3
ENSG00000072422.16_RHOBTB1	1381.74	-0.357573	0.0748721	-4.77578	1.79012e-06	4.5364e-05	1593.95	1614.63	1224.22	1218.37	1257.52
ENSG00000145819.15_ARHGAP26	197.937	0.66281	0.13882	4.77459	1.80072e-06	4.55594e-05	140.58	121.582	253.357	242.637	231.529
ENSG00000104497.13_SNX16	445.764	0.524601	0.109903	4.77333	1.81205e-06	4.57725e-05	328.725	348.482	515.834	496.68	539.099
ENSG00000134900.11_TPP2	3420.38	0.350668	0.0735354	4.76869	1.85429e-06	4.67643e-05	3063.17	2754.56	3677.73	3625.04	3981.39
ENSG00000138660.11_AP1AR	741.147	0.476069	0.0999348	4.7638	1.8998e-06	4.78354e-05	585.575	581.578	781.352	836.787	920.441
ENSG00000151304.5_SRFBP1	789.557	0.468257	0.0983259	4.76229	1.91405e-06	4.81173e-05	608.828	640.433	864.453	852.341	981.728
ENSG00000058668.14_ATP2B4	39940.9	-0.293155	0.0615792	-4.76062	1.92998e-06	4.84404e-05	45947.5	44245.6	35903.7	34658.8	38949.1
ENSG00000120539.14_MASTL	976.715	0.460085	0.0966648	4.75959	1.93987e-06	4.86109e-05	802.258	753.496	996.199	1171.71	1159.91
ENSG00000075240.16_GRAMD4	795.753	-0.449631	0.0947703	-4.74443	2.09092e-06	5.23129e-05	930.154	998.982	676.969	726.875	645.784
ENSG00000144834.12_TAGLN3	74.91	0.755232	0.159285	4.74137	2.12274e-06	5.30246e-05	40.1658	31.7506	112.49	101.617	88.5258
ENSG00000145147.19_SLIT2	661.473	0.575485	0.121533	4.73523	2.18802e-06	5.45687e-05	498.901	463.869	846.212	633.553	864.829
ENSG00000091986.15_CCDC80	35621.7	-0.263561	0.0557373	-4.72863	2.26037e-06	5.6284e-05	39467.1	39967.8	31868.2	32159.8	34645.3
ENSG00000117394.19_SLC2A1	19660	-0.325489	0.0689651	-4.71963	2.36279e-06	5.87412e-05	22636.6	22391.1	17969.1	19068.8	16234.3
ENSG00000105085.10_MED26	559.119	0.506727	0.10739	4.71858	2.37494e-06	5.89503e-05	411.171	449.155	691.157	645.996	598.116
ENSG00000110660.14_SLC35F2	1501.23	0.34314	0.0730128	4.69973	2.60504e-06	6.45599e-05	1275.79	1286.29	1666.07	1641.43	1636.59
ENSG00000159403.15_C1R	362.859	0.561981	0.119602	4.69876	2.6174e-06	6.47642e-05	264.248	269.493	416.519	464.536	399.501
ENSG00000113580.14_NR3C1	1788.01	0.335816	0.0714893	4.69744	2.63446e-06	6.50663e-05	1505.16	1557.33	1944.77	1918.29	2014.53
ENSG00000173110.7_HSPA6	22.6429	0.625972	0.133266	4.69717	2.63788e-06	6.50663e-05	0	2.32321	46.6177	40.4395	23.8339
ENSG00000075213.10_SEMA3A	964.79	0.458275	0.0976712	4.69201	2.70532e-06	6.66253e-05	806.486	731.038	1064.1	1019.28	1203.04
ENSG00000130164.11_LDLR	5592.73	0.265654	0.0566473	4.68961	2.73732e-06	6.7308e-05	4878.03	5056.09	5949.83	6153.03	5926.69
ENSG00000011422.11_PLAUR	4353.57	0.363435	0.0775206	4.68824	2.75565e-06	6.7653e-05	3739.64	3607.95	5028.63	4321.85	5069.8
ENSG00000175745.11_NR2F1	554.945	0.479552	0.102346	4.68562	2.79118e-06	6.83123e-05	447.108	424.374	608.056	645.996	649.189
ENSG00000183018.8_SPNS2	1189.97	-0.466105	0.0994701	-4.68588	2.78762e-06	6.83123e-05	1368.81	1541.84	1041.8	1105.35	892.067
ENSG00000163132.6_MSX1	139.378	0.710404	0.151817	4.67933	2.87811e-06	7.03304e-05	89.8445	75.8917	189.511	191.829	149.813
ENSG00000260032.1_LINC00657	12646.5	-0.296403	0.0633575	-4.67826	2.89325e-06	7.05908e-05	14221.9	14379.1	11164.9	11077.3	12389.1
ENSG00000172466.15_ZNF24	3806.68	0.328404	0.0702578	4.67428	2.94992e-06	7.1862e-05	3293.59	3254.05	4112.49	3917.45	4455.8
ENSG00000109501.13_WFS1	4928.12	-0.288819	0.061826	-4.67149	2.99029e-06	7.27329e-05	5605.24	5506.02	4737.77	4426.57	4365
ENSG00000172379.18_ARNT2	1527.94	-0.376607	0.080634	-4.67057	3.00366e-06	7.29453e-05	1819.09	1763.32	1426.91	1372.87	1257.52
ENSG00000204186.7_ZDBF2	929.47	0.43753	0.0936976	4.6696	3.01788e-06	7.31778e-05	738.839	760.466	990.118	1016.17	1141.76
ENSG00000109814.11_UGDH	4720.52	0.327756	0.0702482	4.66568	3.07592e-06	7.44703e-05	4168.78	3954.89	5293.13	4781.2	5404.61
ENSG00000174684.6_B4GAT1	1287.95	-0.374188	0.0802395	-4.66339	3.11039e-06	7.51894e-05	1554.84	1462.08	1174.56	1153.05	1095.22
ENSG00000163297.16_ANTXR2	3704.09	0.394924	0.0846944	4.66294	3.11731e-06	7.5241e-05	3014.55	3121.63	4119.58	3685.18	4579.51
ENSG00000101236.16_RNF24	1467.93	0.377919	0.0810653	4.66191	3.13289e-06	7.55012e-05	1207.09	1248.34	1626.55	1532.55	1725.12
ENSG00000072195.14_SPEG	4246.15	-0.431967	0.0927442	-4.65761	3.19896e-06	7.68581e-05	5012.26	5204	3709.14	4156.98	3148.34
ENSG00000110057.7_UNC93B1	653.074	0.511672	0.109856	4.65764	3.19856e-06	7.68581e-05	506.3	494.845	774.258	830.566	659.403
ENSG00000183696.13_UPP1	391.108	0.531237	0.114115	4.65529	3.23529e-06	7.76125e-05	287.502	302.018	451.989	475.942	438.089
ENSG00000139514.12_SLC7A1	8795.76	0.2604	0.0559814	4.65155	3.29455e-06	7.87938e-05	7893.63	7771.93	9560.67	9064.68	9687.9
ENSG00000141905.17_NFIC	6446.93	-0.291425	0.0626483	-4.65176	3.29109e-06	7.87938e-05	6894.77	7652.67	5885.99	5917.65	5883.56
ENSG00000126705.13_AHDC1	1909.17	-0.481388	0.103519	-4.65024	3.31545e-06	7.91733e-05	2393.03	2317.79	1722.83	1786.6	1325.62
ENSG00000057294.13_PKP2	3071.17	-0.316282	0.0680592	-4.64715	3.3655e-06	8.02467e-05	3556.78	3451.52	2747.4	2937.57	2662.58
ENSG00000272031.2_ANKRD34A	343.47	-0.55234	0.118931	-4.64422	3.41369e-06	8.12727e-05	432.31	449.155	261.464	298.63	275.792
ENSG00000104936.17_DMPK	3113.86	-0.371028	0.0800807	-4.63317	3.601e-06	8.56027e-05	3532.47	3748.12	2806.18	2981.12	2501.42
ENSG00000113161.15_HMGCR	4487.14	0.272613	0.0588498	4.63235	3.61546e-06	8.58168e-05	4054.63	3890.61	4893.84	4878.67	4717.97
ENSG00000074935.13_TUBE1	483.425	0.508032	0.109708	4.63074	3.64354e-06	8.6353e-05	353.036	387.977	541.17	540.231	594.712
ENSG00000143870.12_PDIA6	17151.5	0.241267	0.0521203	4.62904	3.67363e-06	8.69353e-05	15683.7	15149.7	18267	17855.6	18801.5
ENSG00000156463.17_SH3RF2	5322.02	-0.250735	0.054183	-4.62755	3.70011e-06	8.74303e-05	5885.34	5920.33	4948.57	4969.92	4885.94
ENSG00000135919.12_SERPINE2	6368.53	0.310457	0.0672427	4.61695	3.89413e-06	9.18769e-05	5635.89	5421.61	6892.32	6506.62	7386.23
ENSG00000156671.12_SAMD8	1846.92	0.369626	0.0801503	4.61166	3.99459e-06	9.4106e-05	1540.04	1563.52	1989.36	1929.69	2212.01
ENSG00000180730.4_SHISA2	26.8747	0.662725	0.143724	4.6111	4.00545e-06	9.42082e-05	6.34196	3.87202	46.6177	32.1442	45.3978
ENSG00000184254.16_ALDH1A3	573.963	-0.484878	0.105161	-4.61082	4.0109e-06	9.42082e-05	748.352	672.183	489.485	508.086	451.708
ENSG00000184588.17_PDE4B	88.0844	0.723909	0.157014	4.61048	4.01731e-06	9.42181e-05	48.6217	47.2387	113.504	113.023	118.034
ENSG00000128016.5_ZFP36	457.062	0.560273	0.121598	4.60758	4.07391e-06	9.52739e-05	304.414	365.519	542.184	593.113	480.082
ENSG00000166562.8_SEC11C	1449.88	0.389513	0.084538	4.60755	4.07443e-06	9.52739e-05	1156.35	1250.66	1546.49	1560.55	1735.33
ENSG00000188042.7_ARL4C	5650.33	-0.295349	0.0641624	-4.60315	4.16145e-06	9.71643e-05	6504.74	6271.13	4883.71	5165.89	5426.17
ENSG00000140511.11_HAPLN3	225.63	0.628476	0.13672	4.5968	4.29037e-06	0.000100026	171.233	137.07	280.719	275.818	263.307
ENSG00000123384.13_LRP1	48246.5	-0.213191	0.0464258	-4.59208	4.38843e-06	0.000102161	52755.6	52599.1	45819.1	44445.1	45613.5
ENSG00000196730.12_DAPK1	1748.66	-0.343875	0.0748917	-4.59163	4.39803e-06	0.000102233	2047.4	1993.32	1631.62	1586.47	1484.51
ENSG00000186063.12_AIDA	6112.49	0.263383	0.0575145	4.57943	4.66249e-06	0.000108221	5500.6	5368.95	6624.77	6334.49	6733.63
ENSG00000151748.14_SAV1	1329.32	0.359967	0.0786204	4.57854	4.68235e-06	0.000108522	1108.79	1136.83	1406.64	1508.71	1485.64
ENSG00000147224.10_PRPS1	6106.72	-0.338111	0.0738636	-4.5775	4.7056e-06	0.0001089	6919.08	7152.4	5771.47	5732.05	4958.58
ENSG00000111790.13_FGFR1OP2	1404.33	0.423272	0.0924883	4.5765	4.7283e-06	0.000109265	1143.67	1140.7	1465.42	1502.48	1769.38
ENSG00000115009.11_CCL20	19.7968	0.609857	0.133421	4.57092	4.85577e-06	0.000112046	2.11399	0.774405	28.376	27.9966	39.7231
ENSG00000065534.18_MYLK	28586.8	-0.235383	0.0515581	-4.56538	4.98586e-06	0.000114879	32025.9	30983.9	26305.5	26102.2	27516.8
ENSG00000148572.14_NRBF2	1216.6	0.396131	0.0868072	4.56334	5.03469e-06	0.000115835	946.009	1064.81	1419.81	1308.58	1343.78
ENSG00000173276.13_ZBTB21	1159.94	0.409783	0.0898167	4.56244	5.05617e-06	0.000116159	986.175	917.67	1278.95	1215.26	1401.66
ENSG00000172086.7_KRCC1	1018.17	0.394996	0.0866075	4.56076	5.0969e-06	0.000116924	867.792	818.546	1086.39	1134.38	1183.75
ENSG00000130150.11_MOSPD2	791.844	0.411629	0.0903101	4.55795	5.16561e-06	0.000118328	657.45	640.433	864.453	885.522	911.361
ENSG00000159251.6_ACTC1	334.932	-0.571085	0.125326	-4.55678	5.19437e-06	0.000118814	483.046	390.3	266.531	273.745	261.037
ENSG00000176490.4_DIRAS1	1308.68	-0.413129	0.0906847	-4.55566	5.22204e-06	0.000119273	1514.67	1607.66	1132	1249.48	1039.61
ENSG00000143514.16_TP53BP2	2770.09	0.293128	0.0644136	4.55072	5.34635e-06	0.000121936	2448	2404.53	3072.71	2908.54	3016.69
ENSG00000188549.12_C15orf52	5575.54	-0.308653	0.0678946	-4.54607	5.4658e-06	0.00012448	6047.06	6632.78	4958.7	5345.28	4893.89
ENSG00000164736.5_SOX17	59.2644	0.723414	0.159196	4.54418	5.51506e-06	0.00012542	25.3678	27.1042	90.195	67.3992	86.2559
ENSG00000171033.12_PKIA	986.135	0.381649	0.0841035	4.53784	5.68325e-06	0.000129058	820.227	824.741	1084.37	1073.2	1128.14
ENSG00000116106.11_EPHA4	690.259	0.461159	0.10167	4.53582	5.73801e-06	0.000130114	542.238	552.151	832.024	713.395	811.486
ENSG00000185215.8_TNFAIP2	212.145	0.644821	0.14221	4.53429	5.77962e-06	0.000130869	127.896	151.783	289.84	266.486	224.719
ENSG00000132470.13_ITGB4	3631.81	-0.38781	0.0856115	-4.52989	5.90147e-06	0.000133436	4266.03	4297.17	2962.25	3627.12	3006.47
ENSG00000182199.10_SHMT2	4339.41	0.293029	0.0647724	4.52397	6.06903e-06	0.000137028	3752.33	3848.02	4928.3	4702.39	4466.01
ENSG00000076706.14_MCAM	3872	-0.31066	0.0686851	-4.52296	6.09804e-06	0.000137486	4447.83	4369.19	3712.18	3546.24	3284.53
ENSG00000107485.15_GATA3	24.4955	0.625385	0.13853	4.51445	6.34815e-06	0.00014292	2.11399	4.64643	29.3894	35.255	51.0726
ENSG00000113657.12_DPYSL3	6559.94	-0.261798	0.0580101	-4.51297	6.39247e-06	0.000143712	7312.28	7311.16	5999.49	6314.79	5861.99
ENSG00000131480.8_AOC2	88.9967	0.715719	0.158652	4.51126	6.44441e-06	0.000144673	53.9067	39.4946	113.504	134.798	103.28
ENSG00000149084.11_HSD17B12	5982.39	0.264096	0.0586026	4.50655	6.58901e-06	0.000147708	5379.04	5253.56	6387.63	6219.39	6672.35
ENSG00000070540.12_WIPI1	1639.62	0.325264	0.0722092	4.50446	6.65405e-06	0.000148831	1382.55	1439.62	1814.03	1772.08	1789.81
ENSG00000196083.9_IL1RAP	313.568	0.556482	0.123544	4.50434	6.658e-06	0.000148831	231.482	228.449	372.941	341.144	393.826
ENSG00000111145.7_ELK3	6177.03	0.318489	0.0708377	4.49604	6.92295e-06	0.000154534	5410.75	5263.63	6666.32	6266.05	7278.41
ENSG00000138709.17_LARP1B	1040.62	0.436278	0.0970501	4.49539	6.94421e-06	0.000154789	881.533	796.863	1176.59	1069.06	1279.08
ENSG00000172613.7_RAD9A	368.319	0.575083	0.128059	4.49076	7.09696e-06	0.00015797	269.533	260.974	457.056	486.311	367.722
ENSG00000167977.8_KCTD5	1699.96	0.352184	0.0784445	4.4896	7.13579e-06	0.00015861	1438.57	1445.81	1955.91	1916.21	1743.28
ENSG00000175832.12_ETV4	260.599	0.61099	0.136154	4.48748	7.20713e-06	0.00015997	181.803	178.113	357.74	315.221	270.117
ENSG00000198142.4_SOWAHC	547.667	0.486907	0.108566	4.48491	7.2945e-06	0.000161681	444.994	407.337	635.419	577.56	673.023
ENSG00000148516.21_ZEB1	2221.43	0.416194	0.0929857	4.47589	7.60938e-06	0.000168423	1876.16	1750.93	2329.87	2307.13	2843.04
ENSG00000148204.11_CRB2	532.101	-0.576879	0.128996	-4.47208	7.74623e-06	0.000171211	698.673	696.964	432.733	501.865	330.269
ENSG00000166128.12_RAB8B	2253.17	0.305842	0.0684005	4.47134	7.77299e-06	0.000171562	1970.24	1949.18	2354.19	2477.18	2515.04
ENSG00000174282.11_ZBTB4	3616.01	-0.278804	0.0624084	-4.46742	7.91696e-06	0.000174495	4085.28	4036.2	3403.09	3373.07	3182.39
ENSG00000131737.5_KRT34	150.842	0.655188	0.146834	4.46212	8.11536e-06	0.000178601	90.9015	102.221	190.524	198.05	172.512
ENSG00000154229.11_PRKCA	5331.82	-0.254101	0.0569499	-4.46184	8.12596e-06	0.000178601	5888.51	5957.5	4814.79	4916	5082.29
ENSG00000002834.17_LASP1	18999.1	-0.272524	0.0611244	-4.45851	8.25309e-06	0.000181142	20753	21797.2	18049.1	17988.3	16407.9
ENSG00000138735.15_PDE5A	725.618	-0.493536	0.110752	-4.45623	8.34147e-06	0.000182827	914.3	892.114	595.895	527.788	697.992
ENSG00000175414.6_ARL10	1153.58	-0.385951	0.0866277	-4.45528	8.37833e-06	0.000183379	1438.57	1281.64	1009.37	985.066	1053.23
ENSG00000116717.11_GADD45A	5038.93	0.291306	0.0654013	4.45413	8.42344e-06	0.000184111	4199.44	4629.39	5516.08	5573.4	5276.36
ENSG00000203811.1_HIST2H3C	45.207	0.70028	0.157314	4.45148	8.52811e-06	0.000185882	19.0259	17.0369	67.8996	65.3254	56.7473
ENSG00000203852.3_HIST2H3A	45.207	0.70028	0.157314	4.45148	8.52811e-06	0.000185882	19.0259	17.0369	67.8996	65.3254	56.7473
ENSG00000132196.13_HSD17B7	603.7	0.443779	0.0997088	4.45075	8.55707e-06	0.000186255	464.02	502.589	669.875	699.915	682.102
ENSG00000198604.10_BAZ1A	3313.09	0.319116	0.0718241	4.44303	8.87024e-06	0.000192805	2859.17	2862.2	3571.32	3396.92	3875.84
ENSG00000166016.5_ABTB2	518.56	0.46964	0.105772	4.44013	8.99054e-06	0.000195151	401.658	414.307	623.258	595.187	558.393
ENSG00000137752.22_CASP1	29.3659	0.658305	0.148506	4.43286	9.29895e-06	0.000201567	6.34196	9.29286	43.5774	45.6241	41.993
ENSG00000254726.2_MEX3A	1292.19	-0.340353	0.0768119	-4.43099	9.3802e-06	0.000203048	1473.45	1508.54	1181.66	1162.38	1134.95
ENSG00000057657.14_PRDM1	73.2706	0.702509	0.158685	4.42708	9.5517e-06	0.000206477	29.5958	34.0738	111.477	66.3623	124.844
ENSG00000114127.10_XRN1	1987.05	0.364471	0.0823432	4.42624	9.58895e-06	0.000206962	1759.89	1587.53	2086.65	2137.07	2364.09
ENSG00000139496.15_NUPL1	3781.81	0.316107	0.0714208	4.42598	9.60044e-06	0.000206962	3261.88	3278.83	3939.19	3974.48	4454.66
ENSG00000094975.13_SUCO	2626.24	0.330362	0.0747381	4.42026	9.85803e-06	0.000212224	2307.42	2200.86	2791.99	2741.59	3089.32
ENSG00000185818.7_NAT8L	1142.47	-0.460203	0.104162	-4.41817	9.95413e-06	0.000214	1328.64	1466.72	1023.56	1064.91	828.51
ENSG00000167004.12_PDIA3	27582	0.229103	0.0518903	4.41514	1.00943e-05	0.000216718	25012.7	24846	29229.3	28428	30393.8
ENSG00000108312.14_UBTF	3840.15	-0.268066	0.060873	-4.4037	1.0642e-05	0.000228164	4202.61	4380.81	3460.85	3630.23	3526.28
ENSG00000064666.14_CNN2	20914.2	-0.301802	0.0685983	-4.39955	1.08477e-05	0.000232259	23186.2	24261.3	19479.1	20223.9	17420.3
ENSG00000179476.7_C14orf28	205.266	0.604812	0.137495	4.39878	1.08862e-05	0.000232767	130.01	152.558	253.357	250.933	239.474
ENSG00000260272.1_RP11-20I23.1	9.41024	-0.454818	0.103405	-4.3984	1.0905e-05	0.000232853	25.3678	21.6833	0	0	0
ENSG00000154305.16_MIA3	3003.15	0.342382	0.0778771	4.39644	1.10042e-05	0.000234652	2599.15	2520.69	3186.22	3098.29	3611.4
ENSG00000173641.17_HSPB7	2277.85	-0.339859	0.0773475	-4.39392	1.11323e-05	0.000237061	2563.21	2693.38	2117.05	2135	1880.6
ENSG00000013441.15_CLK1	1697.32	0.363499	0.0827433	4.39309	1.11752e-05	0.000237333	1437.51	1421.03	1770.46	1813.56	2044.04
ENSG00000186300.11_ZNF555	263.112	0.56813	0.129318	4.39326	1.11662e-05	0.000237333	183.917	195.15	336.458	303.815	296.221
ENSG00000111057.10_KRT18	31349	-0.272099	0.062063	-4.38425	1.16387e-05	0.000246845	35098.5	35110	29118.8	30520.4	26897.1
ENSG00000151651.15_ADAM8	866.287	-0.522833	0.119338	-4.38113	1.18065e-05	0.000250067	1092.93	1105.85	735.748	830.566	566.338
ENSG00000131238.16_PPT1	2127.46	-0.293689	0.0670796	-4.37821	1.19658e-05	0.000253099	2382.46	2426.98	1985.3	1936.95	1905.57
ENSG00000126945.8_HNRNPH2	3062.74	-0.273229	0.0624258	-4.37686	1.20399e-05	0.000254325	3348.56	3512.7	2843.68	2822.47	2786.29
ENSG00000113600.10_C9	38.2751	0.652752	0.149187	4.3754	1.2121e-05	0.000255695	12.6839	9.29286	51.6848	39.4026	78.3112
ENSG00000259956.1_RBM15B	3015.64	-0.300556	0.0687666	-4.37066	1.23869e-05	0.000260954	3367.58	3470.88	2808.21	2848.4	2583.14
ENSG00000126562.16_WNK4	171.681	0.620598	0.142006	4.37021	1.24127e-05	0.000261149	120.497	110.74	218.9	207.382	200.885
ENSG00000164327.12_RICTOR	2241.65	0.342444	0.078395	4.36818	1.25285e-05	0.000263233	1927.96	1892.65	2308.59	2410.82	2668.26
ENSG00000065526.10_SPEN	3840.92	0.29406	0.0673457	4.36643	1.26295e-05	0.000265001	3366.53	3353.17	4024.32	4026.33	4434.23
ENSG00000108551.4_RASD1	28.6668	0.635697	0.145607	4.36584	1.26635e-05	0.000265008	5.28497	8.51845	53.7116	38.3657	37.4532
ENSG00000176624.10_MEX3C	2679.38	0.306155	0.0701241	4.3659	1.26598e-05	0.000265008	2327.5	2330.18	2885.23	2773.74	3080.24
ENSG00000126016.13_AMOT	1082.46	-0.377258	0.0865474	-4.35898	1.30673e-05	0.000273094	1320.19	1223.56	941.474	1008.91	918.171
ENSG00000117266.15_CDK18	2770.31	-0.388182	0.0890919	-4.35709	1.31802e-05	0.000275089	3154.07	3386.47	2465.67	2698.04	2147.32
ENSG00000212747.4_FAM127C	934.548	-0.38404	0.0882048	-4.35396	1.33698e-05	0.000278677	1067.56	1133.73	798.581	864.784	808.081
ENSG00000067798.13_NAV3	2092.56	0.451041	0.103725	4.34841	1.37126e-05	0.000285443	1703.87	1627.8	2464.66	1973.24	2693.23
ENSG00000198380.12_GFPT1	5673.51	0.34305	0.0789396	4.34573	1.38812e-05	0.000288572	4996.41	4670.44	6110.97	5716.49	6873.23
ENSG00000062194.15_GPBP1	2447.52	0.315987	0.0728145	4.33962	1.42729e-05	0.000295933	2193.26	2040.56	2613.63	2577.76	2812.4
ENSG00000175029.16_CTBP2	4108.98	0.249972	0.0576002	4.33978	1.42627e-05	0.000295933	3619.15	3731.08	4412.46	4369.54	4412.67
ENSG00000155975.9_VPS37A	1783.15	0.322726	0.074382	4.33876	1.43289e-05	0.000296702	1572.81	1500.8	2023.81	1868.51	1949.84
ENSG00000198342.9_ZNF442	64.2482	0.691817	0.15948	4.33794	1.43823e-05	0.000297417	30.6528	32.525	88.1682	75.6945	94.2005
ENSG00000105287.12_PRKD2	1601.14	0.374253	0.086301	4.3366	1.44704e-05	0.000298846	1307.5	1370.7	1671.14	1949.39	1706.96
ENSG00000159873.9_CCDC117	1160.19	0.386021	0.0890492	4.33492	1.45812e-05	0.000300739	1003.09	925.414	1330.63	1193.48	1348.32
ENSG00000162642.13_C1orf52	637.013	0.425681	0.0982669	4.33189	1.47833e-05	0.00030451	494.673	535.888	704.332	711.321	738.85
ENSG00000052802.12_MSMO1	8080.71	0.241513	0.0557788	4.32983	1.49226e-05	0.000306977	7377.82	7140.79	8351.65	8684.13	8849.17
ENSG00000130508.10_PXDN	28475.3	-0.211364	0.0488308	-4.32849	1.50135e-05	0.000308443	30976.3	31171.3	27213.6	26042	26973.1
ENSG00000173598.13_NUDT4	4489.5	0.286974	0.0663087	4.32785	1.50575e-05	0.000308944	3954.21	3928.56	4833.03	4590.41	5141.3
ENSG00000099204.18_ABLIM1	2506.78	-0.30423	0.0703242	-4.32611	1.51764e-05	0.000310978	2922.59	2773.14	2185.96	2388.01	2264.22
ENSG00000184226.14_PCDH9	392.856	0.554634	0.128237	4.32508	1.52476e-05	0.000312031	274.818	296.597	411.451	435.503	545.909
ENSG00000138650.8_PCDH10	2009.08	0.377957	0.0874151	4.32371	1.5343e-05	0.000313576	1592.89	1758.67	2327.84	2006.42	2359.55
ENSG00000137809.16_ITGA11	1675.1	-0.311109	0.0719602	-4.32336	1.53674e-05	0.000313666	1890.96	1925.94	1538.38	1547.07	1473.16
ENSG00000121039.9_RDH10	2751.89	-0.313008	0.0724576	-4.31988	1.56113e-05	0.000318232	3248.14	3028.7	2492.02	2362.08	2628.53
ENSG00000070413.18_DGCR2	3436.52	-0.365794	0.0847255	-4.31741	1.57874e-05	0.000321406	3919.33	4110.54	3166.96	3300.49	2685.28
ENSG00000147509.13_RGS20	651.142	0.425485	0.0985743	4.31639	1.58599e-05	0.000322465	546.466	508.784	710.413	721.69	768.358
ENSG00000163320.10_CGGBP1	4039.75	0.29496	0.0683929	4.31274	1.61246e-05	0.000327423	3513.45	3549.1	4122.62	4359.17	4654.41
ENSG00000110090.12_CPT1A	1572.22	-0.308701	0.0715954	-4.31174	1.61977e-05	0.000328484	1781.03	1797.39	1420.83	1421.61	1440.25
ENSG00000153234.13_NR4A2	107.046	0.665372	0.154538	4.30556	1.66565e-05	0.000337353	57.0777	70.4708	133.772	139.983	133.924
ENSG00000185338.4_SOCS1	64.8606	0.684108	0.158925	4.30459	1.67294e-05	0.000338394	30.6528	28.653	74.9936	115.097	74.9064
ENSG00000077782.19_FGFR1	6703.5	-0.279555	0.0649928	-4.30133	1.69778e-05	0.000342978	7519.45	7545.8	6169.75	6516.99	5765.52
ENSG00000173801.16_JUP	5615.15	-0.29683	0.0691685	-4.29141	1.77546e-05	0.00035821	6230.98	6484.09	5139.09	5459.34	4762.23
ENSG00000130222.10_GADD45G	36.2987	0.651952	0.151984	4.2896	1.78999e-05	0.000360679	15.8549	8.51845	53.7116	46.661	56.7473
ENSG00000181541.5_MAB21L2	723.966	-0.395737	0.0922669	-4.28904	1.79445e-05	0.000361115	881.533	835.583	637.446	626.294	638.974
ENSG00000105855.9_ITGB8	1580.93	-0.360211	0.0840788	-4.28421	1.83387e-05	0.000368577	1855.02	1829.14	1297.19	1395.68	1527.64
ENSG00000092010.14_PSME1	2610.83	0.316507	0.0738846	4.2838	1.83726e-05	0.000368787	2338.07	2176.85	2865.97	2992.53	2680.74
ENSG00000150687.11_PRSS23	20467.5	-0.236812	0.0553334	-4.27973	1.8712e-05	0.000375121	23106.9	22052	18382.6	19746.9	19048.9
ENSG00000163512.13_AZI2	1592.35	0.339782	0.0794047	4.27911	1.8764e-05	0.000375686	1327.58	1387.73	1672.16	1712.98	1861.31
ENSG00000108691.9_CCL2	2316.87	0.297435	0.0695174	4.27857	1.88098e-05	0.000376124	2006.17	2039.01	2458.57	2634.79	2445.81
ENSG00000171988.17_JMJD1C	3008.89	0.32815	0.0767202	4.27723	1.89233e-05	0.000377913	2638.26	2529.21	3231.82	3072.37	3572.81
ENSG00000138759.17_FRAS1	910.187	-0.373511	0.0874251	-4.27235	1.93423e-05	0.000385791	1080.25	1054.74	778.312	793.237	844.4
ENSG00000111886.10_GABRR2	48.5316	0.665893	0.155873	4.27203	1.93699e-05	0.000385854	16.9119	20.9089	80.0608	48.7348	76.0414
ENSG00000025796.13_SEC63	5214.44	0.290969	0.0682024	4.26625	1.98782e-05	0.000395479	4618.01	4517.1	5482.64	5383.64	6070.82
ENSG00000159388.5_BTG2	755.396	0.39808	0.0933488	4.26444	2.00406e-05	0.000398205	622.569	621.847	848.239	803.606	880.718
ENSG00000008441.16_NFIX	6835.71	-0.281184	0.0660257	-4.2587	2.0562e-05	0.00040805	7609.3	7764.96	6165.69	6711.93	5926.69
ENSG00000167114.12_SLC27A4	1344.17	-0.322247	0.0757809	-4.25236	2.11534e-05	0.000419258	1553.78	1525.58	1227.26	1186.23	1228.01
ENSG00000162695.11_SLC30A7	2640.68	0.29272	0.0688762	4.24994	2.13827e-05	0.000422886	2331.73	2289.92	2750.44	2821.44	3009.88
ENSG00000164307.12_ERAP1	2239.8	0.280302	0.0659555	4.24986	2.13902e-05	0.000422886	2005.12	1941.43	2398.78	2418.08	2435.59
ENSG00000133773.11_CCDC59	1026.94	0.38394	0.0903665	4.2487	2.15013e-05	0.000424017	893.16	814.674	1099.57	1109.5	1217.8
ENSG00000189184.11_PCDH18	257.54	-0.558693	0.131489	-4.24895	2.14771e-05	0.000424017	304.414	367.068	211.806	200.124	204.29
ENSG00000137203.10_TFAP2A	1186.64	-0.337203	0.0793813	-4.24788	2.15801e-05	0.000425039	1359.29	1377.67	1063.09	1098.09	1035.07
ENSG00000123689.5_G0S2	56.318	0.676225	0.159297	4.24506	2.18538e-05	0.000429892	28.5388	25.5554	73.9802	80.8791	72.6365
ENSG00000257219.5_RP11-54A9.1	81.3902	0.670606	0.158096	4.24176	2.2177e-05	0.000435706	47.5647	43.3667	107.423	98.5066	110.09
ENSG00000115170.13_ACVR1	1298.9	0.346967	0.0819978	4.23141	2.32228e-05	0.000455682	1076.02	1129.08	1419.81	1363.54	1506.07
ENSG00000135931.17_ARMC9	2391.55	-0.2937	0.0694434	-4.22935	2.34371e-05	0.000459314	2814.77	2596.58	2228.53	2167.14	2150.72
ENSG00000197110.8_IFNL3	16.1647	0.518871	0.122723	4.228	2.35775e-05	0.000461492	0	0	25.3357	37.3288	18.1591
ENSG00000182326.14_C1S	1109.86	0.405435	0.0959564	4.22519	2.38735e-05	0.000466705	860.393	957.164	1132	1349.02	1250.71
ENSG00000184347.14_SLIT3	4872.11	-0.246108	0.0583535	-4.21754	2.46987e-05	0.000482238	5429.78	5364.3	4477.32	4676.47	4412.67
ENSG00000204217.12_BMPR2	6183.07	0.336385	0.0798312	4.2137	2.51221e-05	0.000489896	5419.21	5146.69	6551.81	6241.17	7556.47
ENSG00000134352.19_IL6ST	9227.29	0.31966	0.0758742	4.21303	2.51964e-05	0.000490737	8046.89	7867.95	9662.02	9374.71	11184.9
ENSG00000177606.6_JUN	7228.26	0.316523	0.075198	4.2092	2.56281e-05	0.000498529	6033.32	6454.66	8341.52	8184.34	7127.46
ENSG00000138032.20_PPM1B	1626.56	0.311718	0.0740734	4.20823	2.57378e-05	0.000500045	1415.31	1402.45	1810.99	1699.5	1804.56
ENSG00000241978.9_AKAP2	14600.3	0.250572	0.0596101	4.20352	2.62801e-05	0.000509951	12831.9	13273.3	15874.3	14761.5	16260.4
ENSG00000188636.3_LDOC1L	1840.58	-0.30873	0.0735038	-4.20019	2.66688e-05	0.000516856	2110.82	2081.6	1725.87	1703.65	1580.98
ENSG00000137877.9_SPTBN5	52.9139	0.667607	0.15896	4.19984	2.67102e-05	0.000517022	22.1969	27.1042	68.9131	72.5838	73.7715
ENSG00000069020.18_MAST4	1041.39	0.474365	0.112966	4.1992	2.67862e-05	0.000517856	799.087	823.967	1125.92	1035.87	1422.09
ENSG00000107562.16_CXCL12	135.527	-0.622167	0.148181	-4.19868	2.68474e-05	0.000518403	175.461	200.571	101.343	102.654	97.6053
ENSG00000165572.7_KBTBD6	661.885	-0.414321	0.0987486	-4.19571	2.72014e-05	0.000524595	802.258	782.923	562.452	544.378	617.41
ENSG00000130224.14_LRCH2	488.69	0.441287	0.105255	4.19253	2.75863e-05	0.000531365	390.031	391.074	554.345	537.12	570.878
ENSG00000120697.8_ALG5	947.386	0.371543	0.0887263	4.18751	2.82026e-05	0.000542572	814.942	771.307	995.186	1065.94	1089.55
ENSG00000092098.16_RNF31	1501.1	0.319791	0.0764088	4.18526	2.84835e-05	0.000547307	1268.39	1319.59	1648.85	1692.24	1576.44
ENSG00000212724.3_KRTAP2-3	716.257	0.400641	0.0957803	4.18292	2.87787e-05	0.000552305	578.176	598.615	848.239	777.683	778.573
ENSG00000168310.10_IRF2	722.507	0.391968	0.0937459	4.18118	2.90005e-05	0.000555885	608.828	585.45	783.379	798.422	836.455
ENSG00000203814.6_HIST2H2BF	276.857	0.538938	0.129044	4.17639	2.96171e-05	0.000567013	213.513	193.601	333.418	297.594	346.158
ENSG00000080802.18_CNOT4	1338.93	0.366595	0.0878071	4.17501	2.97977e-05	0.000569778	1174.32	1074.1	1448.19	1397.76	1600.27
ENSG00000135424.15_ITGA7	5598.58	-0.337595	0.0808932	-4.17335	3.00154e-05	0.000573243	6200.33	6719.51	5300.22	5307.95	4464.88
ENSG00000187243.16_MAGED4B	2175.02	-0.281465	0.0674687	-4.17179	3.02221e-05	0.000576491	2424.74	2468.8	2040.03	2006.42	1935.08
ENSG00000077150.17_NFKB2	1616.24	0.335642	0.0805347	4.16767	3.07735e-05	0.000586298	1347.67	1414.06	1897.14	1735.79	1686.53
ENSG00000100625.8_SIX4	933.141	0.384939	0.0923738	4.16719	3.08383e-05	0.000586823	754.694	792.991	1077.27	959.143	1081.6
ENSG00000130402.11_ACTN4	64721.1	-0.186104	0.0447155	-4.16195	3.15537e-05	0.00059971	70114.6	69673.2	61745.1	61195.4	60877.3
ENSG00000153253.15_SCN3A	45.4757	0.640919	0.154007	4.16163	3.1598e-05	0.000599827	13.7409	20.1345	61.8191	47.6979	83.986
ENSG00000170989.8_S1PR1	220.765	0.557323	0.13394	4.161	3.16853e-05	0.000600761	151.15	165.723	266.531	269.597	250.823
ENSG00000137821.11_LRRC49	521.555	0.462593	0.111271	4.15737	3.21927e-05	0.000609647	449.222	372.489	602.989	571.338	611.736
ENSG00000163346.16_PBXIP1	2188.43	-0.357318	0.0859769	-4.15597	3.2391e-05	0.000612664	2416.29	2680.99	2029.89	2060.34	1754.63
ENSG00000166822.12_TMEM170A	648.194	0.406081	0.0977334	4.15499	3.25307e-05	0.000614568	540.124	521.174	723.587	696.804	759.279
ENSG00000138449.10_SLC40A1	192.095	-0.574037	0.138175	-4.15441	3.26129e-05	0.000615383	261.077	249.358	153.028	159.684	137.328
ENSG00000168427.8_KLHL30	208.108	-0.585528	0.14097	-4.15356	3.27336e-05	0.000616921	268.476	289.627	143.907	188.718	149.813
ENSG00000113441.15_LNPEP	4321.55	0.374119	0.0900837	4.15302	3.28116e-05	0.000617651	3639.23	3579.3	4545.22	4327.03	5516.97
ENSG00000176142.12_TMEM39A	1240.67	0.349549	0.0842087	4.15098	3.31054e-05	0.000622437	1089.76	1014.47	1364.07	1298.21	1436.84
ENSG00000176105.13_YES1	3084.09	0.306436	0.07397	4.14271	3.43233e-05	0.000644565	2705.9	2650.01	3286.54	3156.36	3621.61
ENSG00000085721.12_RRN3	2624.62	0.294623	0.0711244	4.14236	3.43751e-05	0.000644769	2399.38	2190.79	2946.03	2825.58	2761.32
ENSG00000152661.7_GJA1	11019.5	-0.214716	0.0518722	-4.13934	3.48309e-05	0.00065254	12188.2	11901.8	10363.3	10101.6	10542.5
ENSG00000153944.10_MSI2	2872.91	-0.270711	0.0654558	-4.13578	3.53751e-05	0.000660377	3197.41	3235.46	2648.09	2540.43	2743.16
ENSG00000154639.18_CXADR	2341.58	-0.303096	0.0732804	-4.13612	3.5323e-05	0.000660377	2706.96	2612.84	2040.03	2075.9	2272.16
ENSG00000205542.10_TMSB4X	53854.7	-0.216789	0.0524155	-4.13596	3.53469e-05	0.000660377	57694.9	60138	50313.6	52159.7	48967.2
ENSG00000116701.14_NCF2	24.107	0.57794	0.139773	4.13485	3.55184e-05	0.00066165	6.34196	3.87202	47.6311	33.1812	29.5086
ENSG00000123610.4_TNFAIP6	18.3221	0.547429	0.132396	4.13479	3.55274e-05	0.00066165	3.17098	1.54881	25.3357	33.1812	28.3736
ENSG00000270379.5_HEATR9	21.2271	0.560204	0.135514	4.13391	3.5664e-05	0.000663409	2.11399	4.64643	25.3357	33.1812	40.858
ENSG00000133316.15_WDR74	1155.07	0.343262	0.0830645	4.13248	3.58873e-05	0.000666776	977.719	987.366	1252.6	1337.62	1220.07
ENSG00000198561.12_CTNND1	9448.23	-0.221132	0.0535202	-4.13175	3.60005e-05	0.00066809	10624.9	10088.2	8775.27	8799.23	8953.59
ENSG00000054282.15_SDCCAG8	1006.54	0.419499	0.101605	4.12874	3.64756e-05	0.000675436	832.911	799.186	1110.72	1013.06	1276.81
ENSG00000157450.15_RNF111	1919.17	0.349392	0.0846253	4.1287	3.64822e-05	0.000675436	1676.39	1577.46	2149.48	1920.36	2272.16
ENSG00000156675.15_RAB11FIP1	2210.03	-0.284162	0.0688836	-4.12525	3.70328e-05	0.000684823	2464.91	2512.94	1940.71	2048.94	2082.63
ENSG00000170185.9_USP38	1597.93	0.302107	0.0732857	4.12231	3.75085e-05	0.000692807	1393.12	1388.51	1789.71	1694.31	1723.98
ENSG00000197044.10_ZNF441	301.121	0.514156	0.124787	4.12028	3.78419e-05	0.000697893	239.938	212.961	335.444	348.402	368.857
ENSG00000198551.9_ZNF627	589.074	0.410695	0.099681	4.12009	3.78726e-05	0.000697893	480.932	480.131	674.943	676.066	633.3
ENSG00000109519.12_GRPEL1	1812.58	0.289949	0.0703939	4.11895	3.806e-05	0.000700198	1569.64	1605.34	2006.59	1922.43	1958.92
ENSG00000119953.12_SMNDC1	1548.96	0.332852	0.080813	4.11879	3.80867e-05	0.000700198	1330.76	1319.59	1705.6	1585.44	1803.43
ENSG00000106689.10_LHX2	2485.91	-0.297966	0.072378	-4.11681	3.84152e-05	0.000704592	2915.19	2722.03	2216.37	2390.08	2185.91
ENSG00000122779.16_TRIM24	1127.09	0.345756	0.083983	4.11698	3.83874e-05	0.000704592	985.118	930.06	1222.19	1199.71	1298.38
ENSG00000101871.14_MID1	2522.71	-0.271285	0.0659145	-4.1157	3.86e-05	0.000707158	2909.9	2742.94	2324.8	2296.76	2339.12
ENSG00000108854.15_SMURF2	9081.53	0.269307	0.0654625	4.11391	3.89013e-05	0.000711848	8017.3	8063.88	9829.23	9111.34	10385.9
ENSG00000151623.14_NR3C2	410.354	0.468612	0.114153	4.10514	4.04072e-05	0.000738545	317.098	323.701	462.123	443.798	505.051
ENSG00000169184.5_MN1	1158.2	-0.422096	0.102828	-4.10487	4.04541e-05	0.000738545	1434.34	1355.21	948.568	1155.12	897.742
ENSG00000183091.19_NEB	119.253	0.626077	0.152579	4.10329	4.07318e-05	0.000742754	80.3315	70.4708	154.041	134.798	156.622
ENSG00000155254.12_MARVELD1	2744.67	-0.305446	0.0744642	-4.10192	4.09742e-05	0.000746309	3181.55	3063.55	2617.68	2561.17	2299.4
ENSG00000119523.9_ALG2	1340.5	0.336244	0.0821222	4.09444	4.23199e-05	0.000769928	1133.1	1155.41	1518.11	1373.91	1521.96
ENSG00000136560.13_TANK	1140.45	0.327353	0.0799813	4.09287	4.26071e-05	0.000774259	976.662	980.397	1238.41	1227.7	1279.08
ENSG00000102158.19_MAGT1	3141.38	0.304742	0.0744966	4.09069	4.30095e-05	0.00078067	2755.58	2703.45	3325.05	3220.65	3702.19
ENSG00000112773.15_FAM46A	2742.94	0.314308	0.076904	4.08702	4.36949e-05	0.000792197	2442.71	2299.98	2967.32	2788.25	3216.44
ENSG00000179292.4_TMEM151A	1629.95	-0.449543	0.110048	-4.08497	4.40832e-05	0.000798316	1975.52	2010.36	1513.05	1540.85	1109.98
ENSG00000198467.13_TPM2	40831.8	-0.300593	0.0736205	-4.08301	4.44569e-05	0.000804158	43225.8	49453.5	37500.9	39510.5	34468.3
ENSG00000171928.13_TVP23B	1539.54	0.322486	0.0790057	4.0818	4.46873e-05	0.000807399	1307.5	1341.27	1757.28	1581.29	1710.36
ENSG00000152413.14_HOMER1	565.609	0.436028	0.106853	4.08063	4.49131e-05	0.000810547	480.932	425.923	657.714	597.261	666.213
ENSG00000133818.12_RRAS2	2710.61	0.265535	0.0651496	4.07578	4.58598e-05	0.000826684	2397.26	2411.5	3004.81	2820.4	2919.08
ENSG00000166225.8_FRS2	1280.93	0.368305	0.0904889	4.07016	4.69799e-05	0.000845908	1048.54	1095.78	1325.56	1370.8	1563.96
ENSG00000147027.3_TMEM47	2229.59	0.293142	0.072119	4.0647	4.80951e-05	0.000864997	1941.7	1956.15	2394.73	2304.02	2551.36
ENSG00000145358.6_DDIT4L	387.8	0.461978	0.113706	4.06293	4.84606e-05	0.000870576	310.756	298.146	431.72	461.425	436.954
ENSG00000163430.9_FSTL1	30204.2	-0.202291	0.0498371	-4.05904	4.92752e-05	0.0008842	33729.7	31961.2	28418.5	28595.9	28315.8
ENSG00000163788.13_SNRK	952.207	0.366073	0.0902083	4.05809	4.94765e-05	0.000886802	788.517	807.704	1029.64	1004.77	1130.41
ENSG00000112763.15_BTN2A1	1340.78	0.309079	0.0761904	4.05666	4.97796e-05	0.000891219	1138.38	1184.84	1447.17	1468.27	1465.21
ENSG00000139438.5_FAM222A	104.985	0.630466	0.155529	4.05368	5.04182e-05	0.000901627	68.7046	59.6292	141.88	138.946	115.764
ENSG00000113758.13_DBN1	16103	-0.267687	0.0660523	-4.05266	5.06395e-05	0.000904556	17851.6	18171.4	15370.7	15497.7	13623.9
ENSG00000135999.11_EPC2	1008.39	0.345986	0.0854179	4.05051	5.11051e-05	0.000911839	857.222	854.169	1078.29	1086.68	1165.59
ENSG00000152242.10_C18orf25	1991.25	0.308345	0.0762045	4.04629	5.20367e-05	0.000927409	1742.98	1709.89	2138.33	2052.05	2313.02
ENSG00000149596.6_JPH2	636.922	-0.427674	0.10576	-4.04381	5.25896e-05	0.000936203	753.637	786.021	584.748	574.449	485.757
ENSG00000072041.16_SLC6A15	862.643	0.380894	0.094233	4.04205	5.29871e-05	0.000942212	720.87	712.452	1004.31	881.375	994.212
ENSG00000175471.19_MCTP1	990.526	0.349875	0.0867166	4.03469	5.46733e-05	0.000971099	848.766	828.613	1036.74	1100.16	1138.35
ENSG00000154736.5_ADAMTS5	1958.31	-0.326579	0.0810323	-4.03024	5.57206e-05	0.000988585	2261.97	2237.26	1831.26	1602.03	1859.04
ENSG00000196993.8_NPIPB9	76.786	0.635511	0.15782	4.02682	5.65371e-05	0.00100194	50.7357	20.1345	94.2487	98.5066	120.304
ENSG00000077264.14_PAK3	389.147	0.495535	0.123079	4.02617	5.66938e-05	0.00100359	314.984	278.011	403.344	450.019	499.376
ENSG00000107331.16_ABCA2	3326.25	-0.242051	0.0601611	-4.02338	5.73685e-05	0.00101439	3738.59	3621.12	3110.21	3100.36	3060.95
ENSG00000079156.16_OSBPL6	312.98	0.497028	0.123571	4.0222	5.7656e-05	0.00101833	256.849	219.931	364.834	356.697	366.587
ENSG00000170448.11_NFXL1	517.581	0.42922	0.106748	4.02089	5.79797e-05	0.0010229	399.544	431.344	550.291	597.261	609.466
ENSG00000155252.13_PI4K2A	3348	0.26388	0.0656584	4.01899	5.84492e-05	0.00103003	2937.39	3006.24	3762.86	3586.68	3446.83
ENSG00000135480.14_KRT7	22590	-0.299647	0.07469	-4.01187	6.02401e-05	0.0010604	25457.7	25810.9	20783.4	22431.5	18466.7
ENSG00000118473.21_SGIP1	738.375	0.385573	0.0961265	4.0111	6.04376e-05	0.00106269	605.657	616.426	814.796	777.683	877.313
ENSG00000113504.19_SLC12A7	1364.7	0.307574	0.0766865	4.0108	6.05145e-05	0.00106285	1150.01	1215.82	1502.91	1471.38	1483.37
ENSG00000165507.8_C10orf10	246.506	-0.569719	0.142104	-4.00917	6.09324e-05	0.00106781	325.554	332.994	188.497	232.268	153.218
ENSG00000166965.12_RCCD1	558.794	-0.402511	0.100395	-4.00928	6.0904e-05	0.00106781	664.849	668.311	479.351	507.05	474.407
ENSG00000214402.6_LCNL1	137.308	-0.634605	0.158299	-4.00889	6.1004e-05	0.00106787	218.798	188.18	72.9668	131.688	74.9064
ENSG00000171943.11_SRGAP2C	1511.42	0.312645	0.0779993	4.00831	6.11542e-05	0.00106932	1320.19	1294.03	1558.65	1670.46	1713.77
ENSG00000185262.8_UBALD2	965.544	0.416341	0.103908	4.00682	6.15426e-05	0.00107491	732.497	832.485	1197.87	1100.16	964.704
ENSG00000160201.11_U2AF1	987.147	0.334766	0.0835767	4.00549	6.18884e-05	0.00107975	826.569	858.815	1077.27	1096.02	1077.06
ENSG00000169925.16_BRD3	2210.49	-0.264375	0.0660146	-4.0048	6.20699e-05	0.00108172	2468.08	2470.35	2082.59	2015.76	2015.66
ENSG00000148218.15_ALAD	1264.71	-0.311475	0.0777832	-4.0044	6.21758e-05	0.00108237	1451.25	1434.97	1178.62	1114.68	1144.03
ENSG00000149451.17_ADAM33	715.206	-0.440051	0.109934	-4.00286	6.2582e-05	0.00108823	896.331	845.65	533.063	692.657	608.331
ENSG00000158615.8_PPP1R15B	2652.08	0.277734	0.0694283	4.00029	6.3264e-05	0.00109888	2309.53	2363.48	2868	2720.86	2998.53
ENSG00000120370.12_GORAB	503.641	0.464082	0.116063	3.99855	6.37327e-05	0.0011058	398.487	388.751	550.291	524.677	655.999
ENSG00000100226.15_GTPBP1	1993.49	0.295737	0.0739668	3.99824	6.38159e-05	0.00110603	1800.06	1682.01	2160.63	2250.1	2074.68
ENSG00000145354.9_CISD2	1498.86	0.321826	0.0805205	3.99682	6.41995e-05	0.00111145	1282.13	1296.35	1680.26	1526.33	1709.23
ENSG00000100425.18_BRD1	1786.73	0.305571	0.0765204	3.99332	6.51533e-05	0.00112638	1596.06	1506.99	1865.72	1915.18	2049.71
ENSG00000135953.10_MFSD9	313.119	0.491568	0.123103	3.99314	6.5205e-05	0.00112638	221.969	254.779	358.753	356.697	373.397
ENSG00000136997.14_MYC	3774.57	0.272526	0.0682542	3.99282	6.52931e-05	0.00112666	3261.88	3408.16	4239.17	4144.53	3819.09
ENSG00000175220.11_ARHGAP1	5168.68	-0.251165	0.062981	-3.98795	6.6646e-05	0.00114875	5853.63	5629.15	4967.82	4849.63	4543.19
ENSG00000095380.10_NANS	2317.43	0.280781	0.0704561	3.98519	6.74274e-05	0.00115968	2024.14	2053.72	2571.07	2568.43	2369.77
ENSG00000164308.16_ERAP2	133.077	0.592694	0.148723	3.98523	6.74152e-05	0.00115968	93.0154	84.4101	163.162	165.906	158.892
ENSG00000154451.14_GBP5	16.6742	0.509807	0.127983	3.98339	6.79393e-05	0.00116593	1.05699	2.32321	33.4431	23.849	22.6989
ENSG00000196247.11_ZNF107	793.924	0.405948	0.101908	3.9835	6.79084e-05	0.00116593	664.849	631.914	795.54	959.143	918.171
ENSG00000146733.13_PSPH	937.492	0.351905	0.0883758	3.98192	6.83613e-05	0.00117063	810.714	775.179	1088.42	1010.99	1002.16
ENSG00000177732.7_SOX12	1331	-0.386363	0.0970293	-3.98192	6.83617e-05	0.00117063	1522.07	1627.8	1195.84	1287.84	1021.45
ENSG00000172262.11_ZNF131	1264.62	0.318498	0.0800088	3.98079	6.86868e-05	0.00117492	1122.53	1058.61	1419.81	1338.65	1383.5
ENSG00000154358.19_OBSCN	1111.46	-0.330871	0.0831363	-3.97987	6.89532e-05	0.00117692	1295.87	1263.83	947.555	1028.62	1021.45
ENSG00000179021.9_C3orf38	1087.52	0.325755	0.0818497	3.97991	6.89408e-05	0.00117692	921.699	944.774	1176.59	1226.67	1167.86
ENSG00000178951.8_ZBTB7A	2130.88	-0.282562	0.0710464	-3.97715	6.97475e-05	0.00118918	2345.47	2453.31	1941.73	2034.42	1879.47
ENSG00000186918.13_ZNF395	1390.86	-0.328483	0.0826561	-3.9741	7.06462e-05	0.0012032	1543.21	1655.68	1262.73	1316.88	1175.8
ENSG00000122644.12_ARL4A	697.368	0.378907	0.0954244	3.97076	7.16439e-05	0.00121888	584.518	574.608	740.815	777.683	809.216
ENSG00000164128.6_NPY1R	52.694	0.630708	0.158865	3.97008	7.18478e-05	0.00122102	28.5388	23.2321	76.007	65.3254	70.3666
ENSG00000095383.19_TBC1D2	3430.95	-0.364123	0.0917882	-3.967	7.27845e-05	0.00123561	3990.15	4040.84	3242.97	3294.27	2586.54
ENSG00000166598.12_HSP90B1	69720.3	0.272221	0.0686532	3.96516	7.33475e-05	0.00124382	63308.6	59911.8	72061.8	71312.5	82006.6
ENSG00000256861.1_RP11-512M8.5	426.118	-0.459734	0.115981	-3.96387	7.37441e-05	0.0012492	544.352	506.461	376.995	321.442	381.342
ENSG00000060491.16_OGFR	1871.63	0.42962	0.108426	3.96234	7.42176e-05	0.00125587	1450.2	1553.46	2133.26	2468.89	1752.36
ENSG00000183496.5_MEX3B	1014.77	0.337296	0.0851309	3.96209	7.42976e-05	0.00125588	860.393	869.657	1161.39	1069.06	1113.38
ENSG00000243156.7_MICAL3	4997.31	-0.221745	0.0559721	-3.96171	7.44154e-05	0.00125652	5450.92	5508.34	4579.68	4750.09	4697.54
ENSG00000162924.13_REL	428.703	0.508995	0.128493	3.96125	7.45578e-05	0.00125757	337.181	305.116	492.526	423.06	585.632
ENSG00000130147.15_SH3BP4	9207.48	-0.223301	0.0563791	-3.96071	7.47276e-05	0.00125909	10227.5	9980.53	8885.73	8270.4	8673.25
ENSG00000118160.13_SLC8A2	13.9341	0.470117	0.118719	3.95993	7.49726e-05	0.00125917	0	0	16.2148	22.812	30.6435
ENSG00000138134.11_STAMBPL1	478.132	0.428727	0.108265	3.95997	7.49603e-05	0.00125917	365.72	401.142	558.398	519.493	545.909
ENSG00000180901.10_KCTD2	1200.23	-0.316834	0.0800087	-3.95999	7.49533e-05	0.00125917	1393.12	1353.66	1057	1127.12	1070.25
ENSG00000007341.18_ST7L	577.899	0.393093	0.0992764	3.95958	7.5081e-05	0.00125965	485.16	466.966	650.62	651.18	635.57
ENSG00000181472.4_ZBTB2	1134.07	0.331693	0.0838627	3.95519	7.64734e-05	0.00128164	940.724	998.208	1302.25	1220.44	1208.72
ENSG00000189241.6_TSPYL1	4636.33	-0.235616	0.059597	-3.95348	7.70214e-05	0.00128945	4957.3	5269.83	4264.5	4384.06	4305.98
ENSG00000177733.6_HNRNPA0	4704.19	-0.314576	0.0796108	-3.95143	7.7687e-05	0.00129921	5153.9	5598.17	4398.27	4545.82	3824.77
ENSG00000149257.13_SERPINH1	11283.5	-0.227428	0.0575759	-3.95006	7.81319e-05	0.00130527	12414.4	12394.4	10645	10944.6	10019.3
ENSG00000180530.9_NRIP1	2835.43	0.273744	0.0693107	3.94952	7.83066e-05	0.0013068	2473.37	2532.3	3062.58	2898.17	3210.76
ENSG00000198369.9_SPRED2	1389.49	0.306247	0.0775926	3.94686	7.91822e-05	0.00132001	1193.35	1217.36	1571.83	1459.97	1504.94
ENSG00000103034.14_NDRG4	736.587	-0.425149	0.107778	-3.94468	7.99066e-05	0.00133068	863.564	916.895	624.271	717.543	560.663
ENSG00000136295.14_TTYH3	13525.7	-0.357111	0.0905929	-3.94193	8.08299e-05	0.00134463	15612.9	15941.1	12833	13142.8	10098.7
ENSG00000108852.14_MPP2	425.106	-0.470414	0.119401	-3.93978	8.15572e-05	0.0013553	539.067	517.302	376.995	385.731	306.435
ENSG00000132003.9_ZSWIM4	557.707	0.439222	0.11165	3.93393	8.35676e-05	0.00138724	397.43	488.649	663.795	607.63	631.03
ENSG00000144567.10_FAM134A	2944.9	-0.244616	0.0622825	-3.92752	8.58251e-05	0.00142321	3302.05	3222.3	2793.01	2698.04	2709.12
ENSG00000196110.7_ZNF699	186.431	0.548594	0.139823	3.92348	8.72788e-05	0.0014458	128.953	136.295	238.155	218.788	209.965
ENSG00000175556.16_LONRF3	43.7205	0.616763	0.157241	3.92242	8.76658e-05	0.00144965	17.9689	21.6833	59.7922	60.1409	59.0172
ENSG00000248167.6_TRIM39-RPP21	21.5762	0.461745	0.117722	3.92233	8.76954e-05	0.00144965	0	0	56.7519	11.406	39.7231
ENSG00000086598.10_TMED2	11086.9	0.213006	0.0543179	3.92146	8.80128e-05	0.00145337	10244.4	9939.49	11721.3	11410.2	12118.9
ENSG00000254806.5_SYS1-DBNDD2	68.8389	-0.625078	0.15948	-3.91946	8.87462e-05	0.00146394	113.098	97.575	34.4565	44.5872	54.4774
ENSG00000181222.14_POLR2A	14729.1	0.226774	0.0578672	3.91887	8.89661e-05	0.00146603	13743	12893.1	15318	15371.2	16320.5
ENSG00000274070.1_GATSL2	279.773	-0.527006	0.134712	-3.91209	9.15006e-05	0.00150622	332.953	390.3	207.753	261.302	206.56
ENSG00000127870.16_RNF6	2974.3	0.242738	0.0620766	3.91031	9.21793e-05	0.00151581	2620.29	2714.29	3217.63	3169.84	3149.47
ENSG00000156232.7_WHAMM	962.043	0.374432	0.0957975	3.90857	9.28423e-05	0.00152511	840.31	763.563	1146.19	981.955	1078.2
ENSG00000137275.13_RIPK1	1683.66	0.295783	0.0756834	3.90816	9.30007e-05	0.00152612	1508.33	1430.33	1825.18	1753.42	1901.03
ENSG00000156875.13_HIAT1	1676.14	0.298004	0.0762909	3.90615	9.37777e-05	0.00153727	1435.4	1484.53	1721.81	1879.92	1859.04
ENSG00000196449.3_YRDC	1185.23	0.399806	0.102369	3.90552	9.40249e-05	0.00153972	1007.32	934.707	1481.63	1153.05	1349.45
ENSG00000254996.5_ANKHD1-EIF4EBP3	2214.2	0.280088	0.0717688	3.90264	9.51477e-05	0.00155649	1853.97	2039.78	2419.05	2407.71	2350.47
ENSG00000197647.11_ZNF433	125.229	0.591148	0.151498	3.90201	9.53974e-05	0.00155895	80.3315	83.6357	166.202	158.647	137.328
ENSG00000071242.11_RPS6KA2	3729.97	-0.226185	0.0579771	-3.90127	9.56877e-05	0.00156207	4101.14	4095.83	3455.79	3527.57	3469.53
ENSG00000154127.9_UBASH3B	5342.92	0.292309	0.0749907	3.89794	9.70146e-05	0.00158209	4545.07	4792.79	5909.29	5270.62	6196.8
ENSG00000184009.9_ACTG1	277631	-0.21507	0.0552204	-3.89475	9.8299e-05	0.00160138	316700	290513	264712	254547	261684
ENSG00000174705.11_SH3PXD2B	3863.95	-0.229969	0.0590608	-3.89376	9.87031e-05	0.0016063	4176.18	4328.15	3650.37	3611.56	3553.51
ENSG00000183486.12_MX2	14.2693	0.466985	0.119989	3.8919	9.94633e-05	0.001617	0	0.774405	20.2685	32.1442	18.1591
ENSG00000228696.8_ARL17B	250.809	0.511194	0.13136	3.89155	9.96056e-05	0.00161764	188.145	185.083	269.572	317.295	293.951
ENSG00000124216.3_SNAI1	106.725	0.611025	0.157064	3.8903	0.000100121	0.00162433	78.2175	51.8851	125.665	146.204	131.654
ENSG00000144893.12_MED12L	84.8199	0.614028	0.157901	3.88869	0.000100786	0.00163343	52.8497	48.0131	107.423	118.208	97.6053
ENSG00000157741.14_UBN2	1203.59	0.410824	0.105722	3.88588	0.000101958	0.00165074	1020	935.481	1203.95	1288.88	1569.63
ENSG00000204767.3_FAM196B	697.908	0.410301	0.10561	3.88507	0.0001023	0.00165457	548.58	584.676	821.89	696.804	837.59
ENSG00000113368.11_LMNB1	3168.09	-0.2455	0.0632704	-3.88018	0.00010438	0.00168647	3480.68	3540.58	2977.45	3011.19	2830.55
ENSG00000173114.12_LRRN3	16.9444	0.508173	0.13111	3.87593	0.000106218	0.00171442	2.11399	3.09762	26.3491	25.9228	27.2387
ENSG00000163393.12_SLC22A15	233.925	0.516422	0.13338	3.87181	0.000108028	0.00174184	174.404	171.143	284.773	249.896	289.411
ENSG00000184731.5_FAM110C	451.813	0.41852	0.10813	3.87051	0.000108607	0.00174938	369.948	360.098	529.009	502.902	497.106
ENSG00000261609.3_GAN	973.795	0.326404	0.0844972	3.8629	0.000112051	0.00180301	812.828	855.717	1055.99	1062.83	1081.6
ENSG00000120875.8_DUSP4	3459.95	0.226638	0.0587552	3.85733	0.000114632	0.00184104	3130.82	3125.5	3709.14	3670.67	3663.6
ENSG00000170852.10_KBTBD2	1761.98	0.284335	0.0737183	3.85705	0.000114765	0.00184104	1517.84	1573.59	1896.12	1838.44	1983.88
ENSG00000243244.5_STON1	452.69	-0.430306	0.111562	-3.85712	0.000114731	0.00184104	562.321	536.663	360.78	382.62	421.065
ENSG00000111642.14_CHD4	14932.2	-0.188684	0.0489283	-3.85633	0.000115101	0.00184267	16173.1	16121.6	14250.8	13859.4	14256.1
ENSG00000129226.13_CD68	1524.32	0.28995	0.075186	3.85644	0.000115052	0.00184267	1352.95	1314.94	1646.82	1599.95	1706.96
ENSG00000090097.20_PCBP4	3647.01	-0.355783	0.0922778	-3.85557	0.000115462	0.00184657	4027.15	4480.71	3342.28	3580.45	2804.45
ENSG00000103723.12_AP3B2	17.03	0.505388	0.131194	3.85222	0.000117054	0.00187013	3.17098	2.32321	24.3223	26.9597	28.3736
ENSG00000168994.13_PXDC1	2319.3	0.289869	0.0752867	3.85019	0.000118024	0.00188372	1970.24	2087.8	2595.39	2600.57	2342.53
ENSG00000165912.15_PACSIN3	1120.95	-0.38915	0.101173	-3.84638	0.000119875	0.00191017	1319.13	1342.04	990.118	1102.24	851.209
ENSG00000198053.11_SIRPA	4594.13	-0.225353	0.0585898	-3.84628	0.000119924	0.00191017	4950.96	5141.27	4403.34	4245.11	4229.94
ENSG00000086712.12_TXLNG	1583.1	0.331998	0.0863484	3.84487	0.000120617	0.00191926	1376.21	1328.88	1726.88	1592.7	1890.82
ENSG00000119986.6_AVPI1	793.625	-0.345871	0.0900523	-3.84078	0.000122646	0.00194957	923.813	919.219	732.708	710.284	682.102
ENSG00000096696.13_DSP	11671.2	0.208778	0.0543746	3.83962	0.000123224	0.00195679	10515	10770.4	12204.7	12051	12814.7
ENSG00000159784.17_FAM131B	1200.75	-0.323339	0.0842372	-3.83843	0.000123822	0.0019643	1381.49	1376.89	1111.73	1129.2	1004.43
ENSG00000134970.13_TMED7	6021.9	0.29589	0.0771114	3.83718	0.000124456	0.00197238	5360.02	5142.82	6274.13	6094.96	7237.55
ENSG00000150457.8_LATS2	2452.31	0.250482	0.0653086	3.83536	0.000125378	0.00198299	2154.15	2225.64	2605.52	2594.35	2681.88
ENSG00000272325.1_NUDT3	2475.04	-0.262019	0.0683135	-3.83554	0.000125291	0.00198299	2867.62	2660.08	2249.81	2268.76	2328.91
ENSG00000189367.14_KIAA0408	275.865	0.494071	0.128905	3.83283	0.00012668	0.00200157	218.798	198.248	313.149	300.704	348.428
ENSG00000100852.12_ARHGAP5	3513.7	0.245919	0.0641998	3.83053	0.000127867	0.002018	3224.89	3068.19	3647.32	3731.84	3896.27
ENSG00000139613.11_SMARCC2	3650.8	-0.224858	0.0587047	-3.83032	0.000127976	0.002018	4036.66	3982.76	3365.59	3406.25	3462.72
ENSG00000125148.6_MT2A	32571.9	0.285468	0.074563	3.82854	0.000128904	0.0020306	30919.2	26215.2	35435.5	33273.4	37016.3
ENSG00000112242.14_E2F3	1998.72	0.273089	0.0713433	3.82781	0.000129286	0.00203458	1762.01	1766.42	2132.25	2080.04	2252.87
ENSG00000105650.21_PDE4C	15.6937	0.482487	0.126079	3.82685	0.000129793	0.00203848	1.05699	2.32321	21.282	31.1073	22.6989
ENSG00000153395.9_LPCAT1	4577.71	-0.217888	0.0569336	-3.82706	0.000129683	0.00203848	4966.81	5057.64	4362.8	4207.79	4293.5
ENSG00000035403.16_VCL	27057.1	-0.199661	0.0521959	-3.82523	0.000130652	0.00204992	30287.1	28508.9	25324.5	25178.3	25986.8
ENSG00000119772.16_DNMT3A	1141.9	-0.313268	0.0819863	-3.82098	0.00013292	0.00208343	1310.67	1300.23	1049.91	1066.98	981.728
ENSG00000263001.5_GTF2I	16801.1	-0.212483	0.0556314	-3.81947	0.000133737	0.00209415	18977.3	17733.9	15377.7	15743.4	16173
ENSG00000196954.12_CASP4	483.049	0.479586	0.125643	3.81706	0.000135053	0.00211265	310.756	426.697	547.251	526.751	603.791
ENSG00000175592.8_FOSL1	6945.95	0.220751	0.0578427	3.8164	0.000135412	0.00211617	6080.89	6511.2	7523.68	7306.08	7307.91
ENSG00000144057.15_ST6GAL2	1358.51	-0.341745	0.0895543	-3.81606	0.0001356	0.002117	1571.75	1576.69	1126.93	1345.91	1171.26
ENSG00000055208.17_TAB2	4778.77	0.238376	0.062677	3.80325	0.000142811	0.00222737	4406.61	4184.11	5113.75	4899.41	5289.98
ENSG00000186130.4_ZBTB6	644.071	0.375151	0.0987333	3.79964	0.000144904	0.00225778	510.528	559.12	738.788	695.767	716.151
ENSG00000196227.10_FAM217B	840.79	-0.351518	0.0925233	-3.79924	0.000145139	0.0022592	965.035	992.787	785.406	695.767	764.953
ENSG00000205213.13_LGR4	2095.84	-0.26494	0.0697521	-3.79831	0.000145688	0.0022655	2388.81	2297.66	1899.16	1889.25	2004.31
ENSG00000135318.11_NT5E	17846.6	0.250303	0.0659589	3.79483	0.000147745	0.00229522	16124.4	15758.4	18935.9	17851.5	20562.9
ENSG00000198890.7_PRMT6	841.449	-0.345146	0.0910209	-3.79195	0.000149471	0.00231975	936.496	1016.02	725.614	776.647	752.469
ENSG00000150051.13_MKX	22.6791	0.520576	0.137361	3.78983	0.000150753	0.00233733	5.28497	5.42083	33.4431	23.849	45.3978
ENSG00000129250.11_KIF1C	14343.5	-0.220181	0.0581362	-3.78733	0.000152275	0.00235861	15258.8	16185.1	14015.7	13231	13026.9
ENSG00000104320.13_NBN	2377.89	0.279076	0.0737008	3.78661	0.000152715	0.0023631	2143.58	2041.33	2491	2477.18	2736.35
ENSG00000154319.14_FAM167A	191.828	0.543099	0.143545	3.78347	0.000154659	0.00238966	121.554	148.686	252.343	232.268	204.29
ENSG00000171488.14_LRRC8C	1354.38	0.360033	0.0951626	3.78334	0.000154735	0.00238966	1170.09	1103.53	1461.36	1358.35	1678.58
ENSG00000244607.5_CCDC13	22.6168	0.534145	0.141204	3.78279	0.00015508	0.00239265	6.34196	6.19524	30.4028	38.3657	31.7785
ENSG00000140416.19_TPM1	53424.9	-0.193084	0.0510605	-3.78147	0.000155906	0.00240135	59387.2	56385.2	49461.3	50272.6	51618.5
ENSG00000144566.10_RAB5A	3116.5	0.259017	0.0684976	3.7814	0.000155949	0.00240135	2728.1	2812.64	3268.3	3227.9	3545.57
ENSG00000144810.15_COL8A1	31511.9	-0.186056	0.0492101	-3.78084	0.000156302	0.00240442	33850.2	34230.2	29541.4	29264.7	30673
ENSG00000092847.10_AGO1	2371.44	-0.267476	0.070766	-3.77972	0.000157005	0.00241288	2697.45	2611.29	2175.83	2080.04	2292.59
ENSG00000112078.13_KCTD20	2795.23	-0.259998	0.0688042	-3.77881	0.000157578	0.00241933	3248.14	2989.98	2575.12	2508.29	2654.64
ENSG00000111817.16_DSE	1077.9	0.33185	0.0878478	3.77756	0.000158375	0.00242903	925.927	915.347	1261.72	1108.46	1178.07
ENSG00000141232.4_TOB1	2428.61	0.273109	0.072302	3.77733	0.000158519	0.00242903	2080.16	2204.73	2558.9	2531.1	2768.13
ENSG00000182218.9_HHIPL1	471.04	-0.396726	0.105075	-3.77565	0.000159592	0.0024431	565.492	558.346	408.411	418.912	404.041
ENSG00000164647.8_STEAP1	261.922	0.51063	0.135257	3.77526	0.000159842	0.00244454	194.487	192.052	289.84	276.855	356.373
ENSG00000170873.18_MTSS1	130.973	0.582404	0.154296	3.77458	0.000160277	0.00244881	79.2745	89.0566	164.175	131.688	190.671
ENSG00000275832.4_ARHGAP23	10765.3	-0.240509	0.0637403	-3.77327	0.000161122	0.00245934	11372.2	12437.7	10284.3	10225	9507.44
ENSG00000111653.19_ING4	411.563	-0.427398	0.113346	-3.77073	0.00016277	0.00248208	521.098	478.582	331.391	368.103	358.643
ENSG00000136527.17_TRA2B	7025.79	0.200658	0.0532842	3.7658	0.000166014	0.0025291	6377.9	6484.09	7343.29	7355.85	7567.82
ENSG00000185201.16_IFITM2	2547.78	0.323317	0.0858925	3.7642	0.000167082	0.00254291	2161.55	2211.7	2842.66	3045.41	2477.59
ENSG00000106823.12_ECM2	24.2783	0.535354	0.142283	3.7626	0.000168154	0.00255493	6.34196	7.74405	28.376	41.4764	37.4532
ENSG00000185909.14_KLHDC8B	903.613	-0.405384	0.107742	-3.76254	0.000168197	0.00255493	1090.82	1076.42	808.715	879.301	662.808
ENSG00000140350.15_ANP32A	5122.89	-0.23701	0.063092	-3.75658	0.00017225	0.00261397	5490.03	5822.75	4667.85	4989.62	4644.2
ENSG00000184640.17_SEPT9	15913.3	-0.266989	0.071116	-3.75427	0.000173847	0.00263568	17332.6	18285.2	14698.7	15821.2	13428.7
ENSG00000137177.18_KIF13A	4865.1	-0.215691	0.0574593	-3.7538	0.000174172	0.00263806	5254.32	5389.86	4552.32	4458.72	4670.3
ENSG00000183709.7_IFNL2	12.0013	0.432374	0.115308	3.74973	0.000177028	0.00267874	0	0	20.2685	23.849	15.8892
ENSG00000240771.6_ARHGEF25	441.598	-0.412726	0.110106	-3.74842	0.000177949	0.00269009	535.896	527.37	354.7	395.063	394.961
ENSG00000174808.11_BTC	143.057	0.55374	0.147759	3.74759	0.00017854	0.00269643	107.813	89.831	173.296	175.238	169.107
ENSG00000171992.12_SYNPO	1310.22	-0.293745	0.0784076	-3.74639	0.000179401	0.00270528	1479.79	1489.18	1171.52	1248.44	1162.18
ENSG00000272869.5_CTC-487M23.8	117.276	0.597392	0.159462	3.74629	0.00017947	0.00270528	69.7616	61.178	126.678	111.986	216.775
ENSG00000125968.8_ID1	1206.8	0.333631	0.0891	3.74446	0.000180785	0.00272108	1052.77	1006.73	1444.13	1278.51	1251.85
ENSG00000132405.18_TBC1D14	2666.48	-0.234483	0.0626233	-3.74435	0.000180863	0.00272108	2979.67	2904.02	2488.98	2484.44	2475.32
ENSG00000133794.17_ARNTL	450.71	0.41723	0.111474	3.74284	0.000181955	0.00273488	340.352	384.879	488.472	525.714	514.13
ENSG00000011405.13_PIK3C2A	5403.61	0.29313	0.0783233	3.74257	0.00018215	0.0027352	4799.81	4634.04	5679.25	5408.53	6496.43
ENSG00000166949.15_SMAD3	6155.72	-0.213424	0.0570455	-3.7413	0.00018307	0.0027464	6914.85	6544.5	5746.13	5881.36	5691.75
ENSG00000131242.15_RAB11FIP4	144.933	-0.563797	0.150886	-3.73658	0.000186538	0.00279576	170.176	224.577	121.611	101.617	106.685
ENSG00000253873.5_PCDHGA11	640.722	-0.378932	0.101489	-3.73374	0.000188654	0.00282479	802.258	713.227	551.304	544.378	592.442
ENSG00000112655.15_PTK7	5913.78	-0.265476	0.0711316	-3.73218	0.000189831	0.0028397	6701.34	6529.01	5590.06	5768.34	4980.14
ENSG00000099849.14_RASSF7	658.712	-0.414044	0.110956	-3.7316	0.000190271	0.00284358	796.973	791.442	552.318	651.18	501.646
ENSG00000120616.15_EPC1	919.376	0.373059	0.099991	3.73093	0.000190775	0.00284572	702.901	823.967	1045.86	942.552	1081.6
ENSG00000121858.10_TNFSF10	13.6147	0.450243	0.120678	3.73093	0.000190771	0.00284572	1.05699	0.774405	17.2283	21.7751	27.2387
ENSG00000131013.3_PPIL4	1976.04	0.3607	0.0967991	3.72628	0.000194329	0.00289598	1660.54	1651.81	2016.72	2016.79	2534.33
ENSG00000003402.19_CFLAR	2418.71	0.270099	0.0725057	3.72521	0.000195152	0.0029055	2141.47	2133.49	2574.11	2474.07	2770.4
ENSG00000134758.13_RNF138	889.101	0.325944	0.0875098	3.72465	0.000195586	0.0029092	771.605	751.947	943.501	1005.8	972.648
ENSG00000155158.20_TTC39B	157.444	0.538198	0.144535	3.72367	0.00019635	0.00291505	113.098	109.191	179.377	183.533	202.02
ENSG00000183291.15_SEP15	4983.41	0.222883	0.0598553	3.72371	0.00019632	0.00291505	4640.2	4387	5397.51	5152.41	5339.92
ENSG00000122643.18_NT5C3A	616.746	0.367902	0.0988129	3.72322	0.000196701	0.00291751	529.554	500.266	695.211	658.439	700.261
ENSG00000152749.7_GPR180	1431.91	0.292468	0.0785656	3.7226	0.000197182	0.0029219	1307.5	1194.91	1524.19	1555.37	1577.57
ENSG00000157593.16_SLC35B2	3035.59	-0.244487	0.0657123	-3.72057	0.000198775	0.00294273	3322.13	3405.06	2909.55	2852.54	2688.69
ENSG00000134684.10_YARS	4885.99	0.223163	0.0600425	3.71675	0.000201805	0.00298478	4371.73	4475.29	5337.72	5257.14	4988.09
ENSG00000145390.11_USP53	2806.94	0.335417	0.0902683	3.71578	0.000202582	0.00299345	2342.3	2437.05	2832.53	2903.35	3519.47
ENSG00000083896.12_YTHDC1	3260.05	0.255828	0.0688549	3.71547	0.000202829	0.0029943	2881.36	2923.38	3415.25	3356.48	3723.76
ENSG00000073008.14_PVR	8280.66	0.224082	0.060332	3.71415	0.000203886	0.00300708	7458.15	7528.76	9231.31	8369.95	8815.12
ENSG00000166801.15_FAM111A	1884.17	0.285161	0.0768206	3.71203	0.0002056	0.00302951	1651.02	1651.81	1904.23	2067.6	2146.18
ENSG00000170836.11_PPM1D	696.921	0.372934	0.100533	3.70958	0.0002076	0.00305612	558.093	600.164	838.104	752.798	735.445
ENSG00000145860.11_RNF145	4337.68	-0.208211	0.0561317	-3.70934	0.000207801	0.00305623	4714.19	4747.1	4091.21	4038.77	4097.15
ENSG00000150337.13_FCGR1A	32.8728	0.556816	0.150149	3.70844	0.000208544	0.00306429	9.51294	15.4881	46.6177	39.4026	53.3424
ENSG00000105245.9_NUMBL	1173.09	-0.327945	0.0884566	-3.70741	0.000209389	0.00307383	1304.33	1397.8	1079.3	1113.64	970.378
ENSG00000168874.12_ATOH8	245.196	-0.506617	0.136739	-3.70498	0.000211406	0.00310055	299.129	331.445	209.779	218.788	166.837
ENSG00000185722.16_ANKFY1	4082.11	0.231796	0.0626677	3.69881	0.000216609	0.0031739	3780.87	3580.07	4270.58	4271.04	4508
ENSG00000139083.10_ETV6	958.809	0.313422	0.084806	3.69575	0.000219241	0.00320948	818.113	835.583	1019.51	1048.32	1072.52
ENSG00000114126.17_TFDP2	1146.8	-0.301254	0.0815367	-3.69471	0.000220142	0.00321968	1283.19	1324.23	1034.71	1006.84	1085.01
ENSG00000115008.5_IL1A	20.2962	0.502608	0.136085	3.69334	0.000221329	0.00323404	4.22797	5.42083	27.3625	38.3657	26.1037
ENSG00000073910.19_FRY	690.101	-0.35986	0.0974841	-3.69147	0.00022296	0.00325485	808.6	806.93	624.271	567.19	643.514
ENSG00000115966.16_ATF2	2130.34	0.272313	0.0738091	3.68942	0.000224765	0.00327815	1920.56	1840.76	2294.4	2178.55	2417.43
ENSG00000169495.4_HTRA4	117.237	-0.569123	0.154383	-3.68643	0.000227425	0.00331388	173.347	152.558	76.007	103.691	80.5811
ENSG00000092841.18_MYL6	29979.4	-0.285315	0.0774316	-3.68474	0.000228939	0.00333285	32021.6	35662.1	28486.4	29151.7	24575
ENSG00000126261.12_UBA2	4693.5	0.209353	0.0568214	3.6844	0.000229239	0.00333413	4307.25	4249.16	5015.45	4861.04	5034.62
ENSG00000147454.13_SLC25A37	2149.5	0.303715	0.0824824	3.68218	0.000231251	0.0033603	1853.97	1874.06	2206.23	2233.51	2579.73
ENSG00000085433.15_WDR47	1615.02	0.270757	0.0735551	3.68101	0.000232315	0.00336654	1424.83	1428	1698.5	1719.2	1804.56
ENSG00000138678.10_AGPAT9	406.774	0.499162	0.135595	3.68128	0.000232067	0.00336654	286.445	317.506	512.794	371.214	545.909
ENSG00000177469.12_PTRF	27289.7	-0.242154	0.0657849	-3.681	0.000232323	0.00336654	28866.5	31551.6	26125.1	26248.4	23656.8
ENSG00000123933.14_MXD4	2570.27	-0.340074	0.0924121	-3.67998	0.000233253	0.00337691	2990.24	2969.07	2348.11	2561.17	1982.75
ENSG00000160271.14_RALGDS	1309.08	-0.284443	0.0773834	-3.67576	0.000237145	0.0034301	1512.56	1442.72	1170.51	1213.19	1206.45
ENSG00000031698.12_SARS	5367.92	0.204134	0.055544	3.67517	0.00023769	0.003433	4912.91	4897.34	5772.48	5552.66	5704.24
ENSG00000096070.19_BRPF3	2861.51	0.265894	0.0723546	3.67488	0.000237962	0.003433	2521.99	2545.47	3004.81	2930.31	3304.96
ENSG00000171786.5_NHLH1	25.097	0.526258	0.143206	3.67484	0.000238	0.003433	6.34196	9.29286	33.4431	32.1442	44.2629
ENSG00000116679.15_IVNS1ABP	5882.36	-0.203549	0.0554243	-3.67255	0.000240142	0.00346073	6465.63	6340.83	5396.5	5616.95	5591.88
ENSG00000108840.15_HDAC5	1907.34	-0.297643	0.0810604	-3.67187	0.000240778	0.00346429	2130.9	2200.86	1791.74	1832.22	1580.98
ENSG00000172794.19_RAB37	116.334	-0.56203	0.153066	-3.67182	0.00024083	0.00346429	143.751	175.79	94.2487	85.0267	82.851
ENSG00000164136.16_IL15	160.531	0.553456	0.150742	3.67153	0.000241103	0.00346505	110.984	106.868	179.377	237.453	167.972
ENSG00000166986.12_MARS	5306.16	0.202311	0.0551099	3.67105	0.000241557	0.00346841	4793.47	4911.28	5680.26	5575.47	5570.31
ENSG00000029993.14_HMGB3	2421.8	-0.253547	0.0691113	-3.66868	0.000243808	0.00349755	2638.26	2750.69	2261.97	2316.46	2141.64
ENSG00000134802.17_SLC43A3	1069.93	0.301243	0.0821248	3.66811	0.000244346	0.00350207	944.952	914.572	1184.7	1172.75	1132.68
ENSG00000125398.5_SOX9	3651.18	0.265535	0.0724108	3.66707	0.00024535	0.00351326	3236.51	3230.82	3746.64	3784.73	4257.18
ENSG00000121691.4_CAT	1708.8	-0.262894	0.0717581	-3.66362	0.000248674	0.00355763	1894.13	1924.4	1542.44	1625.88	1557.15
ENSG00000165732.12_DDX21	8881.46	0.233329	0.0637315	3.66113	0.000251109	0.00358919	8007.78	7989.54	9338.73	8971.36	10099.9
ENSG00000135636.13_DYSF	2894.75	-0.226974	0.062019	-3.65975	0.000252457	0.00360519	3163.58	3202.94	2722.07	2738.48	2646.69
ENSG00000015532.9_XYLT2	1921.71	-0.304145	0.0831167	-3.65925	0.000252953	0.003609	2045.28	2330.96	1789.71	1809.41	1633.19
ENSG00000020577.13_SAMD4A	2711.74	0.239522	0.0655135	3.65608	0.000256105	0.00365066	2362.38	2505.2	2951.1	2886.76	2853.25
ENSG00000157551.17_KCNJ15	29.4878	0.540865	0.148131	3.65125	0.000260965	0.00371657	8.45595	13.1649	47.6311	37.3288	40.858
ENSG00000170091.10_HMP19	14.242	0.453099	0.124134	3.65009	0.000262152	0.0037301	1.05699	2.32321	21.282	23.849	22.6989
ENSG00000078081.7_LAMP3	18.5746	0.46264	0.126914	3.64532	0.000267064	0.00379655	4.22797	1.54881	18.2417	27.9966	40.858
ENSG00000198538.10_ZNF28	648.347	0.385194	0.105867	3.63848	0.000274249	0.00389518	515.813	551.376	801.621	676.066	696.857
ENSG00000197019.4_SERTAD1	584.119	0.454756	0.125055	3.63644	0.000276431	0.00392248	421.741	486.326	733.721	735.17	543.639
ENSG00000277443.1_MARCKS	14501	-0.198703	0.0546454	-3.63622	0.00027667	0.00392248	15576.9	15926.4	13122.9	14094.7	13783.9
ENSG00000124006.14_OBSL1	3696.4	-0.315081	0.0866676	-3.63551	0.000277433	0.00392976	4244.89	4222.83	3511.53	3606.38	2896.38
ENSG00000204642.13_HLA-F	26.7433	0.514659	0.141641	3.63355	0.000279547	0.00395614	9.51294	6.96964	45.6042	46.661	24.9688
ENSG00000140443.13_IGF1R	4337.4	-0.225098	0.0619614	-3.63287	0.000280281	0.00396081	4957.3	4577.51	4026.35	4085.43	4040.41
ENSG00000198715.11_GLMP	2069.12	-0.295164	0.0812501	-3.63278	0.00028038	0.00396081	2269.37	2424.66	1956.93	1976.35	1718.31
ENSG00000166317.11_SYNPO2L	294.654	-0.493062	0.135757	-3.63194	0.000281302	0.00397026	357.264	394.946	283.76	236.416	200.885
ENSG00000133731.9_IMPA1	1301.5	0.291499	0.0802769	3.63117	0.000282141	0.00397497	1120.41	1151.54	1339.75	1446.49	1449.33
ENSG00000166401.13_SERPINB8	2240.57	0.263274	0.0725033	3.6312	0.00028211	0.00397497	1994.55	1978.6	2413.98	2279.13	2536.6
ENSG00000129038.15_LOXL1	9005.77	-0.297887	0.0820514	-3.6305	0.000282874	0.00398174	10074.2	10384.8	8460.09	8939.21	7170.59
ENSG00000214814.6_FER1L6	15.0462	0.45148	0.124371	3.6301	0.000283308	0.00398429	3.17098	0.774405	23.3088	20.7382	27.2387
ENSG00000164663.13_USP49	382.698	0.424485	0.117039	3.62686	0.000286885	0.00403098	319.212	292.725	406.384	459.352	435.819
ENSG00000119630.13_PGF	23.1542	0.494211	0.136282	3.62639	0.000287414	0.00403483	6.34196	5.42083	30.4028	49.7717	23.8339
ENSG00000164329.13_PAPD4	1529.28	0.312792	0.0863269	3.62335	0.000290815	0.00407892	1346.61	1291.71	1690.4	1522.19	1795.48
ENSG00000149582.15_TMEM25	1118.41	-0.29976	0.0828415	-3.61847	0.000296344	0.00415278	1320.19	1224.33	1003.29	1042.1	1002.16
ENSG00000042832.11_TG	33.4113	0.541743	0.149759	3.61744	0.00029753	0.00416568	14.7979	11.6161	53.7116	52.8825	34.0484
ENSG00000170689.9_HOXB9	20.2028	0.480406	0.132845	3.61628	0.000298866	0.00418067	4.22797	4.64643	33.4431	39.4026	19.2941
ENSG00000146592.16_CREB5	1430.29	0.293415	0.0811598	3.61528	0.000300025	0.00419316	1231.4	1262.28	1484.67	1514.93	1658.16
ENSG00000147050.14_KDM6A	1551.74	0.266361	0.0736867	3.61478	0.000300605	0.00419754	1380.43	1366.82	1689.38	1619.66	1702.42
ENSG00000136869.13_TLR4	153.332	0.550018	0.152173	3.61443	0.000301004	0.00419938	95.1294	110.74	178.363	156.574	225.854
ENSG00000143569.18_UBAP2L	9835.37	-0.190475	0.0527116	-3.61352	0.000302067	0.00421047	10818.3	10476.1	9226.24	9148.67	9507.44
ENSG00000143322.19_ABL2	14359.5	-0.218536	0.0604985	-3.61225	0.000303549	0.00422738	15663.6	15803.3	13666.1	12617.1	14047.2
ENSG00000205300.3_RP11-352D3.2	15.1519	0.434387	0.120262	3.61201	0.000303831	0.00422758	1.05699	1.54881	21.282	15.5537	36.3183
ENSG00000244731.7_C4A	81.6489	0.575952	0.159479	3.61147	0.000304467	0.00423268	48.6217	44.1411	74.9936	121.319	119.169
ENSG00000243335.8_KCTD7	721.028	-0.361206	0.100059	-3.60994	0.000306271	0.00425401	907.958	784.472	613.124	659.476	640.109
ENSG00000185567.6_AHNAK2	12588.1	-0.236747	0.0656034	-3.60876	0.000307664	0.00426958	13906.9	13900.6	11612.9	10949.8	12570.7
ENSG00000198794.11_SCAMP5	289.257	-0.448188	0.124218	-3.60809	0.000308456	0.00427681	358.321	356.226	231.061	262.339	238.339
ENSG00000196369.10_SRGAP2B	1574.22	0.349981	0.0970617	3.60576	0.000311245	0.00431168	1325.47	1327.33	1605.27	1615.51	1997.5
ENSG00000154144.12_TBRG1	1412.99	0.270767	0.0751163	3.60464	0.000312587	0.00432646	1238.8	1256.08	1491.76	1521.15	1557.15
ENSG00000138639.17_ARHGAP24	142.027	0.531654	0.147527	3.60378	0.000313624	0.00433699	98.3004	100.673	163.162	184.57	163.432
ENSG00000173575.18_CHD2	3528.13	-0.249423	0.0692453	-3.60202	0.000315749	0.00436254	4046.17	3793.04	3178.11	3159.47	3463.85
ENSG00000099968.17_BCL2L13	2537.16	0.238449	0.0662458	3.59945	0.000318892	0.00440211	2233.43	2323.21	2784.9	2703.23	2641.02
ENSG00000225614.2_ZNF469	741.8	-0.363711	0.101181	-3.59465	0.000324831	0.00448016	851.937	890.566	684.063	696.804	585.632
ENSG00000138131.3_LOXL4	769.23	-0.322907	0.089859	-3.59349	0.000326283	0.00449625	892.103	877.401	684.063	708.21	684.372
ENSG00000179094.13_PER1	478.105	0.418434	0.116469	3.59268	0.000327298	0.00450629	391.088	376.361	595.895	551.637	475.542
ENSG00000144711.13_IQSEC1	1152.21	-0.326986	0.0910387	-3.59173	0.000328495	0.00451882	1416.37	1240.6	1051.94	970.549	1081.6
ENSG00000126822.15_PLEKHG3	1564.98	-0.268105	0.0746588	-3.59107	0.000329321	0.00452622	1757.78	1749.38	1426.91	1499.37	1391.44
ENSG00000141384.11_TAF4B	143.03	0.554795	0.15456	3.58952	0.000331286	0.00454925	87.7305	99.8982	161.135	146.204	220.179
ENSG00000107819.13_SFXN3	2277.85	-0.245569	0.0684249	-3.58889	0.000332089	0.0045563	2617.12	2437.05	2109.96	2127.74	2097.38
ENSG00000125977.6_EIF2S2	6087.46	0.245764	0.0684886	3.5884	0.000332717	0.00456095	5504.82	5388.31	6371.42	6151.99	7020.77
ENSG00000229729.6_RP11-159G9.5	160.576	0.516473	0.144088	3.58443	0.000337809	0.00462672	115.212	115.386	205.726	180.423	186.131
ENSG00000224531.5_SMIM13	1217.3	0.30572	0.0853028	3.58394	0.000338453	0.0046315	1102.44	1006.73	1290.09	1287.84	1399.39
ENSG00000116711.9_PLA2G4A	170.348	0.510754	0.142525	3.5836	0.000338888	0.00463343	119.44	127.002	188.497	201.161	215.64
ENSG00000259024.6_TVP23C-CDRT4	312.236	0.536166	0.149684	3.58198	0.000341005	0.00465833	159.606	270.267	400.304	311.073	419.93
ENSG00000081019.13_RSBN1	634.347	0.343019	0.0957855	3.58111	0.000342133	0.00466968	533.782	539.76	693.184	696.804	708.206
ENSG00000139921.12_TMX1	2574.07	0.237235	0.066256	3.58058	0.000342828	0.00467511	2312.7	2313.15	2681.53	2706.34	2856.66
ENSG00000141580.15_WDR45B	2965.1	0.232882	0.0650675	3.57909	0.000344797	0.0046979	2698.51	2643.82	3273.37	3163.62	3046.19
ENSG00000116299.16_KIAA1324	66.6917	0.570423	0.159394	3.5787	0.000345301	0.00470069	40.1658	34.0738	67.8996	89.1744	102.145
ENSG00000112294.12_ALDH5A1	742.959	-0.327575	0.0915578	-3.57779	0.000346505	0.00471301	852.994	859.589	646.567	666.734	688.912
ENSG00000111424.10_VDR	635.69	0.352811	0.0986575	3.57612	0.00034873	0.00473917	532.725	536.663	734.735	709.247	665.078
ENSG00000123473.15_STIL	1299.99	0.305473	0.0854343	3.57553	0.000349519	0.00474224	1172.21	1080.29	1442.11	1323.1	1482.24
ENSG00000131203.12_IDO1	10.9495	0.401326	0.112243	3.5755	0.000349558	0.00474224	0	0	19.2551	20.7382	14.7543
ENSG00000137842.6_TMEM62	566.182	0.361519	0.101357	3.56681	0.000361358	0.0048981	494.673	453.027	631.365	624.221	627.625
ENSG00000172748.12_ZNF596	157.696	0.526573	0.147686	3.5655	0.000363165	0.00491836	96.1864	124.679	202.685	185.607	179.321
ENSG00000103495.13_MAZ	4052.83	-0.311864	0.0875025	-3.56405	0.000365173	0.00494129	4383.35	4888.82	3748.67	4008.7	3234.59
ENSG00000010818.8_HIVEP2	1951.93	0.32151	0.0903439	3.55874	0.000372642	0.00503803	1686.96	1660.32	2103.88	1918.29	2390.2
ENSG00000075426.11_FOSL2	7996.03	-0.197658	0.0555516	-3.55809	0.000373555	0.00504258	8567.99	8798.01	7651.38	7686.62	7276.14
ENSG00000185352.8_HS6ST3	173.442	0.507687	0.142687	3.55805	0.000373619	0.00504258	135.295	116.935	209.779	191.829	213.37
ENSG00000114784.3_EIF1B	1013.27	0.332086	0.0933556	3.55722	0.000374798	0.00505319	830.797	895.212	1176.59	1146.82	1016.91
ENSG00000196924.14_FLNA	140613	-0.20079	0.0564484	-3.55705	0.000375047	0.00505319	152353	153455	138006	134177	125074
ENSG00000131018.22_SYNE1	4936.14	0.231763	0.0651698	3.55629	0.000376131	0.00506346	4393.92	4500.84	5401.57	4937.77	5446.6
ENSG00000058729.10_RIOK2	1222.25	0.277241	0.0779957	3.55456	0.000378606	0.00509241	1084.48	1066.36	1338.74	1297.18	1324.48
ENSG00000169762.16_TAPT1	782.213	0.331991	0.0934876	3.55118	0.000383508	0.00515394	668.02	665.214	912.085	844.046	821.701
ENSG00000145604.15_SKP2	1408.07	-0.284334	0.0801037	-3.54958	0.000385848	0.00518096	1673.22	1508.54	1297.19	1298.21	1263.19
ENSG00000136051.13_KIAA1033	3087.59	0.264011	0.0744079	3.54816	0.000387932	0.0052045	2747.13	2723.58	3178.11	3182.28	3606.86
ENSG00000156345.17_CDK20	364.121	0.419534	0.118376	3.54407	0.000394004	0.00528147	308.642	274.914	429.693	415.801	391.556
ENSG00000115520.8_COQ10B	1261.95	0.274525	0.0775233	3.54119	0.000398325	0.0053303	1119.36	1104.3	1330.63	1382.2	1373.28
ENSG00000138193.14_PLCE1	1241.26	-0.30363	0.0857374	-3.54139	0.000398022	0.0053303	1475.56	1354.43	1052.95	1163.41	1159.91
ENSG00000150938.9_CRIM1	46012.2	-0.197916	0.0558988	-3.54062	0.000399189	0.00533734	50264.3	49681.2	43499.3	41267	45349
ENSG00000111912.18_NCOA7	1393.12	0.268685	0.0759064	3.53969	0.000400599	0.00535164	1238.8	1223.56	1473.52	1482.78	1546.93
ENSG00000196230.12_TUBB	84894.6	-0.18524	0.0523397	-3.53919	0.000401353	0.00535716	94278.6	89127	81296.1	81828.9	77942.4
ENSG00000113083.12_LOX	31131	0.227043	0.0641712	3.53808	0.000403049	0.00537524	27658.4	28575.5	33150.2	30907.2	35363.8
ENSG00000255302.3_EID1	6150.21	-0.209339	0.0591716	-3.53782	0.000403439	0.00537589	6673.86	6752.04	5707.62	6035.86	5581.66
ENSG00000134138.19_MEIS2	1930.86	-0.246248	0.0696135	-3.53735	0.000404158	0.00538091	2175.29	2110.25	1772.48	1840.52	1755.76
ENSG00000109321.10_AREG	23.8379	0.50784	0.143594	3.53664	0.000405246	0.00539083	8.45595	7.74405	31.4162	35.255	36.3183
ENSG00000023330.14_ALAS1	2705.76	0.233047	0.0659072	3.53599	0.000406248	0.00539143	2446.94	2426.21	2975.42	2774.77	2905.46
ENSG00000033178.12_UBA6	3685.22	0.267998	0.0757972	3.53572	0.000406662	0.00539143	3329.53	3186.68	3870.28	3713.18	4326.41
ENSG00000205978.5_NYNRIN	178.904	-0.514667	0.145554	-3.53591	0.000406374	0.00539143	230.425	239.291	140.866	165.906	118.034
ENSG00000275216.1_RP11-54H7.4	648.978	-0.379563	0.107351	-3.53573	0.000406656	0.00539143	806.486	732.587	521.915	550.6	633.3
ENSG00000067082.14_KLF6	6425.52	0.205373	0.0581043	3.53455	0.000408463	0.00541076	5719.39	6010.93	6582.21	6921.38	6893.66
ENSG00000113319.11_RASGRF2	232.56	0.496491	0.140592	3.53143	0.000413313	0.0054658	176.518	165.723	284.773	227.084	308.705
ENSG00000123066.7_MED13L	3414.2	0.257005	0.0727729	3.5316	0.00041305	0.0054658	3110.73	2962.1	3510.51	3536.9	3950.75
ENSG00000048649.13_RSF1	2794.36	0.254101	0.071977	3.5303	0.000415086	0.00548465	2483.94	2492.81	2930.83	2854.62	3209.63
ENSG00000137449.15_CPEB2	1728.86	0.290322	0.08226	3.52931	0.000416637	0.00550052	1517.84	1500.8	1750.19	1840.52	2034.96
ENSG00000144712.11_CAND2	329.398	-0.44904	0.127442	-3.52349	0.000425899	0.00561808	411.171	405.788	280.719	312.11	237.204
ENSG00000173540.12_GMPPB	1585.67	0.276563	0.0785539	3.52068	0.000430444	0.00567328	1389.95	1400.9	1783.63	1751.34	1602.54
ENSG00000103056.11_SMPD3	153.626	-0.524901	0.149134	-3.51967	0.000432084	0.00569014	232.539	177.339	119.584	128.577	110.09
ENSG00000123268.8_ATF1	866.246	0.334981	0.0952296	3.51762	0.000435443	0.00572957	715.585	755.819	903.977	920.777	1035.07
ENSG00000114315.3_HES1	467.637	0.40093	0.114015	3.51646	0.000437346	0.00574981	383.689	375.586	502.66	584.818	491.431
ENSG00000071246.10_VASH1	394.636	-0.410212	0.116669	-3.51602	0.000438066	0.00575446	452.393	500.266	323.283	368.103	329.134
ENSG00000162618.12_ADGRL4	1058.41	0.365621	0.104089	3.51258	0.000443782	0.00582468	921.699	841.778	1142.13	1048.32	1338.1
ENSG00000164695.4_CHMP4C	204.469	0.477407	0.136011	3.51007	0.000447993	0.00587506	152.207	155.655	251.33	227.084	236.069
ENSG00000104067.16_TJP1	6511.53	0.223839	0.0638006	3.50842	0.000450778	0.00590666	6177.07	5606.69	6971.37	6705.7	7096.81
ENSG00000121310.16_ECHDC2	785.88	-0.337198	0.0961356	-3.50753	0.000452287	0.0059215	911.129	910.7	646.567	752.798	708.206
ENSG00000011566.14_MAP4K3	1367.55	0.262064	0.0748606	3.50069	0.000464054	0.0060705	1213.43	1211.94	1475.55	1456.86	1479.97
ENSG00000156802.12_ATAD2	3183.38	0.242666	0.0693704	3.49812	0.000468552	0.00612426	2991.29	2715.06	3338.23	3347.15	3525.14
ENSG00000119698.11_PPP4R4	149.938	0.513975	0.147021	3.49592	0.000472424	0.00616973	97.2434	115.386	176.336	170.053	190.671
ENSG00000102572.14_STK24	3886.29	0.231654	0.0662693	3.49565	0.000472904	0.00617089	3508.16	3494.11	4014.19	4015.96	4399.05
ENSG00000139200.13_PIANP	848.742	-0.366997	0.105	-3.49522	0.000473669	0.00617575	963.978	1035.38	704.332	853.378	686.642
ENSG00000198728.10_LDB1	2947.27	-0.289863	0.0829636	-3.49385	0.000476101	0.00620231	3329.53	3346.2	2694.7	2954.16	2411.76
ENSG00000224032.6_EPB41L4A-AS1	424.68	0.429918	0.123118	3.49191	0.000479584	0.00624253	336.124	336.092	491.512	545.415	414.255
ENSG00000103449.11_SALL1	40.3516	0.544079	0.155824	3.49161	0.000480116	0.00624429	22.1969	17.0369	52.6982	50.8086	59.0172
ENSG00000075790.10_BCAP29	2051.92	0.283417	0.0812064	3.49008	0.000482884	0.0062751	1799	1796.62	2074.49	2163	2426.51
ENSG00000096968.12_JAK2	480.576	0.378531	0.108475	3.48956	0.000483821	0.00627691	420.684	373.263	537.116	523.64	548.179
ENSG00000148680.15_HTR7	152.48	0.52065	0.149195	3.48972	0.000483525	0.00627691	114.155	99.8982	187.484	156.574	204.29
ENSG00000125741.4_OPA3	1397.64	-0.269088	0.0771458	-3.48804	0.000486569	0.00630736	1599.23	1535.64	1250.57	1269.18	1333.56
ENSG00000165238.16_WNK2	587.587	-0.34889	0.100066	-3.48661	0.000489178	0.00633596	705.015	666.763	517.861	544.378	503.916
ENSG00000171241.8_SHCBP1	1972.62	0.243373	0.0698352	3.48496	0.000492216	0.00637007	1712.33	1819.08	2131.24	2100.78	2099.65
ENSG00000116095.10_PLEKHA3	1175.13	0.284442	0.0816268	3.48467	0.00049275	0.00637174	1040.08	1018.34	1237.39	1247.4	1332.43
ENSG00000125730.16_C3	3504	0.20909	0.0600199	3.48367	0.000494589	0.00639027	3181.55	3203.71	3716.24	3632.3	3786.18
ENSG00000213762.10_ZNF134	911.25	0.300586	0.0863139	3.48247	0.000496802	0.00640923	811.771	770.533	998.226	974.697	1001.02
ENSG00000233822.4_HIST1H2BN	90.5298	0.547353	0.157175	3.48244	0.000496871	0.00640923	57.0777	58.8548	98.3024	119.245	119.169
ENSG00000101335.9_MYL9	17318.3	-0.31458	0.0903573	-3.48151	0.000498592	0.00641041	18827.2	20874.1	16479.3	17118.4	13292.5
ENSG00000124104.18_SNX21	371.269	-0.405181	0.116362	-3.48206	0.000497568	0.00641041	438.652	456.124	328.35	336.996	296.221
ENSG00000140044.12_JDP2	379.198	0.400906	0.115152	3.48155	0.000498529	0.00641041	300.186	314.408	441.854	435.503	404.041
ENSG00000143382.13_ADAMTSL4	210.517	0.475736	0.136645	3.48155	0.000498525	0.00641041	157.492	159.527	268.558	234.342	232.664
ENSG00000112308.12_C6orf62	6532.04	0.190217	0.0546763	3.47896	0.000503355	0.00646636	6119.99	5896.32	6900.43	6970.12	6773.36
ENSG00000180304.14_OAZ2	3230.37	-0.227506	0.0654053	-3.4784	0.000504413	0.00647467	3506.05	3603.31	3144.66	3006.01	2891.84
ENSG00000184863.10_RBM33	2287.2	0.249306	0.0717029	3.47693	0.000507184	0.00650494	2069.59	2014.23	2436.28	2336.16	2579.73
ENSG00000099194.5_SCD	19520.8	0.217148	0.0624868	3.4751	0.000510655	0.0065388	17736.4	17697.5	20562.4	22102.8	19505.2
ENSG00000213380.13_COG8	1080.35	-0.284099	0.0817517	-3.47515	0.000510573	0.0065388	1188.06	1251.44	989.105	1001.66	971.513
ENSG00000169515.5_CCDC8	590.508	-0.362991	0.104526	-3.47272	0.000515208	0.00659173	675.419	713.227	550.291	539.194	474.407
ENSG00000054793.13_ATP9A	2909.86	-0.212208	0.0611357	-3.47109	0.000518348	0.00662651	3167.81	3192.87	2754.5	2701.15	2732.95
ENSG00000146757.13_ZNF92	567.455	0.360627	0.103949	3.46927	0.000521878	0.00666082	473.533	473.936	618.191	595.187	676.428
ENSG00000176853.15_FAM91A1	3995.71	0.242727	0.0699636	3.46933	0.000521768	0.00666082	3713.22	3446.88	4282.74	4035.66	4500.06
ENSG00000103855.17_CD276	3001.17	-0.26284	0.0757741	-3.46873	0.00052293	0.00666884	3297.82	3414.35	2831.52	2932.38	2529.79
ENSG00000132326.11_PER2	114.719	0.53608	0.15461	3.46731	0.000525702	0.00669334	81.3885	72.0197	138.84	121.319	160.027
ENSG00000173875.13_ZNF791	1171.74	0.322928	0.0931342	3.46734	0.000525642	0.00669334	1010.49	995.11	1240.43	1188.3	1424.36
ENSG00000103522.15_IL21R	23.3542	0.483499	0.139513	3.46563	0.000528998	0.00672986	4.22797	10.0673	32.4297	39.4026	30.6435
ENSG00000100342.20_APOL1	19.0274	0.441297	0.127372	3.46464	0.000530948	0.00674921	4.22797	3.09762	15.2014	36.2919	36.3183
ENSG00000177106.14_EPS8L2	3606.9	-0.251518	0.0726516	-3.46198	0.000536217	0.00681069	3849.57	4174.04	3308.84	3551.42	3150.61
ENSG00000135930.13_EIF4E2	2522.18	-0.255306	0.073832	-3.45794	0.000544331	0.0068915	2647.77	2971.39	2384.59	2348.6	2258.54
ENSG00000153933.9_DGKE	528.775	0.391704	0.113272	3.45808	0.00054403	0.0068915	431.253	431.344	573.6	539.194	668.483
ENSG00000175352.10_NRIP3	882.546	0.32412	0.0937169	3.45851	0.000543177	0.0068915	707.129	800.735	1005.32	928.036	971.513
ENSG00000232810.3_TNF	12.5076	0.401791	0.116189	3.4581	0.000544006	0.0068915	1.05699	0.774405	26.3491	20.7382	13.6193
ENSG00000136213.9_CHST12	884.133	-0.345084	0.0999345	-3.45311	0.000554169	0.00701042	993.574	1065.58	877.628	726.875	757.009
ENSG00000092964.16_DPYSL2	9190.13	-0.180408	0.0522795	-3.45083	0.000558867	0.00706417	9913.54	9900.77	8622.24	8575.26	8938.83
ENSG00000280798.1_LINC00294	481.451	-0.389415	0.112875	-3.44997	0.000560641	0.00708091	587.689	562.218	425.639	374.325	457.383
ENSG00000050438.16_SLC4A8	707.86	-0.333403	0.09667	-3.44888	0.000562924	0.00709709	825.512	813.125	633.392	593.113	674.158
ENSG00000162607.12_USP1	2328.56	0.225866	0.0654929	3.44871	0.000563276	0.00709709	2137.24	2071.53	2445.4	2503.1	2485.53
ENSG00000164048.13_ZNF589	233.937	-0.451398	0.130888	-3.44873	0.000563227	0.00709709	297.015	285.755	185.457	207.382	194.076
ENSG00000026950.16_BTN3A1	289.638	0.428042	0.12415	3.44778	0.000565216	0.00711584	224.083	233.87	347.606	321.442	321.19
ENSG00000118873.15_RAB3GAP2	3183.19	0.231615	0.0672281	3.44522	0.000570596	0.00717784	2873.97	2860.65	3313.91	3278.71	3588.7
ENSG00000170421.11_KRT8	56450.9	-0.236112	0.0685399	-3.44488	0.000571313	0.00718111	62038.1	62690.4	52630.3	56762.6	48133
ENSG00000131149.17_GSE1	2217.74	-0.240517	0.0698277	-3.44444	0.000572241	0.00718704	2442.71	2466.48	2090.7	1960.8	2128.02
ENSG00000197961.11_ZNF121	1723.41	0.280358	0.0813998	3.4442	0.000572743	0.0071876	1506.22	1517.83	1742.08	1836.37	2014.53
ENSG00000143641.9_GALNT2	14563.8	-0.211086	0.061305	-3.44321	0.000574856	0.00720837	15621.3	16201.3	14193	13992.1	12811.3
ENSG00000280789.1_PAGR1	691.742	-0.351014	0.101958	-3.44272	0.000575891	0.0072156	808.6	808.479	594.882	678.14	568.608
ENSG00000136715.17_SAP130	1980.23	0.239547	0.0696232	3.44062	0.00058039	0.00726041	1808.52	1745.51	2131.24	2057.23	2158.67
ENSG00000172201.10_ID4	1785.31	0.239053	0.0694775	3.44073	0.000580152	0.00726041	1601.35	1603.02	1933.62	1895.47	1893.09
ENSG00000164251.4_F2RL1	185.281	0.485012	0.141006	3.43966	0.000582448	0.00728037	144.808	130.1	210.793	236.416	204.29
ENSG00000176102.11_CSTF3	1936.95	0.235055	0.0683554	3.43872	0.000584466	0.0072998	1729.24	1754.03	2101.85	2038.57	2061.06
ENSG00000069345.11_DNAJA2	3378.11	0.20595	0.0599003	3.43822	0.000585555	0.0073076	3092.76	3072.84	3624.02	3509.94	3590.97
ENSG00000076351.12_SLC46A1	796.971	-0.373649	0.108735	-3.43634	0.000589636	0.00735269	862.507	1022.21	729.668	617.999	752.469
ENSG00000169926.9_KLF13	606.096	-0.346749	0.100927	-3.43563	0.000591184	0.00736616	721.927	692.318	574.613	530.899	510.726
ENSG00000178209.14_PLEC	57114.4	-0.206734	0.0601834	-3.43507	0.000592407	0.00737556	61353.2	63208.5	54838.6	55992.2	50179.4
ENSG00000251562.7_MALAT1	9976.94	-0.29949	0.0872006	-3.4345	0.000593658	0.0073853	11252.8	11455	8141.87	8609.47	10425.6
ENSG00000160014.16_CALM3	15558.2	-0.23094	0.0672535	-3.43388	0.000595002	0.00739617	17021.8	17276.2	15040.3	15188.7	13264.1
ENSG00000108963.17_DPH1	1480.97	-0.265593	0.0773839	-3.43215	0.000598822	0.00743417	1727.13	1591.4	1339.75	1392.57	1353.99
ENSG00000110422.11_HIPK3	3156.76	0.272105	0.0792833	3.43206	0.000599004	0.00743417	2870.8	2695.7	3290.6	3191.61	3735.11
ENSG00000149656.8_LINC00266-1	31.1444	0.490467	0.142931	3.4315	0.000600263	0.00744392	8.45595	13.1649	26.3491	48.7348	59.0172
ENSG00000119965.12_C10orf88	769.159	0.321512	0.0937472	3.42956	0.000604558	0.00749128	688.103	630.366	820.876	833.677	872.773
ENSG00000119844.14_AFTPH	1172.33	0.306726	0.0894959	3.42727	0.000609685	0.00754887	1015.77	1009.82	1211.05	1225.63	1399.39
ENSG00000068001.13_HYAL2	2383.18	-0.340855	0.0994857	-3.42617	0.000612148	0.00757341	2674.19	2866.85	2324.8	2274.98	1775.05
ENSG00000138785.14_INTS12	674.994	0.324607	0.0948111	3.42373	0.000617689	0.00763596	572.891	580.804	729.668	765.24	726.365
ENSG00000172061.8_LRRC15	771.402	-0.324886	0.0949689	-3.42097	0.000623979	0.00770766	939.667	840.229	669.875	709.247	697.992
ENSG00000118971.7_CCND2	1330.47	-0.293926	0.0859433	-3.42	0.000626219	0.00772926	1497.76	1523.25	1309.35	1201.78	1120.19
ENSG00000136891.13_TEX10	2035.2	0.257608	0.0753354	3.41948	0.0006274	0.00773778	1825.43	1791.2	2172.79	2064.49	2322.1
ENSG00000133142.17_TCEAL4	2317.2	-0.261369	0.0764602	-3.41836	0.000629991	0.00776364	2460.68	2717.39	2089.69	2259.43	2058.79
ENSG00000105767.2_CADM4	2113.14	-0.298159	0.087233	-3.41796	0.000630916	0.00776896	2331.73	2475.77	2027.87	2031.31	1699.01
ENSG00000101773.16_RBBP8	1650.82	0.272415	0.079706	3.41774	0.000631427	0.00776917	1434.34	1474.47	1765.39	1677.72	1902.17
ENSG00000108510.9_MED13	3872.3	0.266321	0.0779324	3.41733	0.000632389	0.00777492	3536.7	3312.9	4153.02	3829.31	4529.57
ENSG00000139505.11_MTMR6	2054.24	0.248093	0.0726627	3.41431	0.000639442	0.0078555	1821.2	1846.96	2166.71	2114.26	2322.1
ENSG00000165006.13_UBAP1	2509.01	0.222847	0.0652886	3.41327	0.00064189	0.00787943	2295.79	2245	2663.29	2605.76	2735.22
ENSG00000175283.7_DOLK	919.167	-0.29124	0.0853837	-3.41096	0.000647356	0.00794033	1059.11	1025.31	821.89	832.64	856.884
ENSG00000165490.12_DDIAS	521.745	0.398876	0.11697	3.41008	0.000649445	0.00795975	472.476	374.812	545.224	616.962	599.251
ENSG00000157764.12_BRAF	1309.05	0.320715	0.0940559	3.40984	0.000650012	0.0079605	1147.9	1095.01	1442.11	1282.66	1577.57
ENSG00000244462.7_RBM12	4016.96	-0.222558	0.065294	-3.40855	0.0006531	0.0079921	4520.76	4302.59	3742.59	3590.82	3928.05
ENSG00000132294.13_EFR3A	3637.54	0.284439	0.0834768	3.4074	0.000655839	0.00801938	3205.86	3161.9	3870.28	3559.72	4389.97
ENSG00000164187.6_LMBRD2	697.326	0.32424	0.0952616	3.40368	0.000664858	0.00812335	614.113	578.48	751.963	747.613	794.462
ENSG00000181467.3_RAP2B	2197.08	0.223355	0.0656465	3.40239	0.000667986	0.00815523	1976.58	1997.96	2360.27	2333.05	2317.56
ENSG00000102531.16_FNDC3A	5066.12	0.240308	0.0706426	3.40174	0.000669576	0.00816831	4708.91	4377.71	5305.29	5136.86	5801.84
ENSG00000100023.17_PPIL2	2079.07	-0.229415	0.0675345	-3.397	0.000681292	0.00830479	2284.16	2296.11	1970.1	1887.18	1957.78
ENSG00000186575.17_NF2	8421.09	-0.210305	0.0619856	-3.3928	0.000691824	0.00842665	9564.74	8834.41	7766.91	8244.48	7694.93
ENSG00000181751.9_C5orf30	1115.67	0.323769	0.0954621	3.3916	0.000694861	0.00845709	906.901	998.982	1301.24	1101.2	1270
ENSG00000109062.9_SLC9A3R1	11422.5	-0.224952	0.0663345	-3.39117	0.000695948	0.00846379	12287.6	12828	10915.6	11217.3	9863.81
ENSG00000183475.12_ASB7	742.27	0.32601	0.0961786	3.38964	0.000699857	0.00850475	645.823	621.847	856.346	761.093	826.24
ENSG00000101544.8_ADNP2	1355.99	0.259999	0.0767429	3.38792	0.000704251	0.00855154	1226.11	1180.97	1483.66	1420.57	1468.62
ENSG00000234883.3_MIR155HG	107.082	0.529093	0.156207	3.38713	0.000706271	0.00856946	64.4766	76.6661	120.598	154.5	119.169
ENSG00000126351.12_THRA	1085.68	-0.317515	0.0937816	-3.38569	0.000710002	0.00860809	1195.46	1298.68	973.904	1064.91	895.472
ENSG00000108021.19_FAM208B	3870.66	0.257765	0.0762333	3.38127	0.000721518	0.00874098	3587.44	3290.45	4008.1	3954.78	4512.54
ENSG00000243207.6_PPAN-P2RY11	26.892	0.434807	0.12862	3.38056	0.000723388	0.00875689	0	11.6161	37.4968	45.6241	39.7231
ENSG00000197302.10_ZNF720	604.121	0.360516	0.106656	3.38018	0.000724384	0.00876221	505.243	501.814	616.164	657.402	739.985
ENSG00000169242.11_EFNA1	229.587	0.448478	0.132693	3.37983	0.000725316	0.00876674	178.632	175.79	249.303	282.04	262.172
ENSG00000186480.12_INSIG1	3532.65	0.235773	0.0697936	3.37815	0.000729744	0.0088135	3132.93	3216.88	3827.71	3965.15	3520.6
ENSG00000163485.15_ADORA1	318.607	-0.429385	0.127184	-3.3761	0.000735209	0.00887268	392.145	391.074	281.733	296.557	231.529
ENSG00000175213.2_ZNF408	507.77	0.402913	0.119382	3.375	0.000738164	0.00890152	385.803	432.892	631.365	596.224	492.566
ENSG00000118960.12_HS1BP3	645.221	-0.362337	0.107372	-3.37458	0.000739277	0.00890196	698.673	819.32	589.815	596.224	522.075
ENSG00000197943.9_PLCG2	67.6065	0.537331	0.15923	3.37456	0.000739331	0.00890196	43.3367	39.4946	84.1145	87.1005	83.986
ENSG00000226137.5_BAIAP2-AS1	418.137	-0.388095	0.115028	-3.37393	0.000741031	0.0089156	468.248	530.467	354.7	388.842	348.428
ENSG00000004776.11_HSPB6	3292.59	-0.211013	0.0625754	-3.37213	0.000745881	0.0089671	3622.32	3573.88	3063.59	3197.83	3005.34
ENSG00000145623.12_OSMR	2972.63	0.216179	0.0641461	3.37011	0.000751393	0.00902647	2724.93	2672.47	3221.69	3041.26	3202.82
ENSG00000006468.13_ETV1	508.413	0.376068	0.111613	3.3694	0.000753322	0.00904274	429.139	408.886	541.17	532.972	629.895
ENSG00000133612.18_AGAP3	3149.39	-0.259553	0.0770663	-3.36792	0.000757383	0.00908456	3539.87	3497.21	3041.3	3042.3	2626.26
ENSG00000110048.11_OSBP	3251.73	0.202391	0.0601199	3.36645	0.000761417	0.00912599	2966.98	2976.81	3420.32	3400.03	3494.5
ENSG00000164951.15_PDP1	2188.68	0.244307	0.0725828	3.36591	0.000762929	0.00913354	1995.6	1921.3	2211.3	2417.04	2398.14
ENSG00000278996.1_CH507-513H4.1	43.0689	0.523074	0.155418	3.36559	0.000763788	0.00913354	15.8549	26.3298	49.6579	62.2147	61.2871
ENSG00000280441.2_CH507-528H12.1	43.0689	0.523074	0.155418	3.36559	0.000763788	0.00913354	15.8549	26.3298	49.6579	62.2147	61.2871
ENSG00000189339.11_SLC35E2B	3930.4	-0.199034	0.0591431	-3.3653	0.000764616	0.00913649	4362.21	4183.34	3717.25	3654.08	3735.11
ENSG00000161791.13_FMNL3	2167.82	0.261039	0.0776593	3.36133	0.000775671	0.00926156	1967.07	1877.93	2434.25	2152.63	2407.22
ENSG00000019549.8_SNAI2	236.545	0.456295	0.135864	3.35847	0.000783766	0.00935112	176.518	184.308	282.746	239.526	299.626
ENSG00000105136.19_ZNF419	483.418	0.35218	0.104871	3.35822	0.000784462	0.00935233	400.601	409.66	530.022	530.899	545.909
ENSG00000243566.6_UPK3B	874.426	-0.384895	0.114663	-3.35674	0.000788659	0.00939525	1035.85	1051.64	787.433	874.116	623.085
ENSG00000183741.11_CBX6	3561.26	-0.295984	0.088185	-3.3564	0.000789642	0.00939984	3929.9	4167.07	3405.12	3497.5	2806.72
ENSG00000111907.20_TPD52L1	1268.44	-0.268252	0.0799817	-3.35392	0.000796758	0.00947738	1447.02	1398.58	1146.19	1129.2	1221.2
ENSG00000118058.20_KMT2A	5004.06	0.276009	0.082362	3.35117	0.00080471	0.00956475	4632.8	4167.85	5199.9	5023.83	5995.92
ENSG00000237927.1_RP3-393E18.2	16.8563	0.417741	0.124675	3.35064	0.000806249	0.0095758	3.17098	3.09762	14.188	33.1812	30.6435
ENSG00000184575.11_XPOT	7544.18	0.247624	0.0739456	3.34872	0.000811844	0.00963499	6926.48	6548.37	8004.05	7445.02	8796.96
ENSG00000141736.13_ERBB2	3326.46	-0.228495	0.0682626	-3.34729	0.000816046	0.00966594	3551.5	3774.45	3216.62	3149.1	2940.64
ENSG00000164331.9_ANKRA2	410.196	0.377755	0.112857	3.34721	0.000816295	0.00966594	319.212	354.677	448.948	470.758	457.383
ENSG00000188766.12_SPRED3	1643.65	0.266494	0.0796106	3.34746	0.000815546	0.00966594	1364.58	1538.74	1814.03	1768.97	1731.93
ENSG00000120256.9_LRP11	2762.29	-0.213326	0.0637746	-3.345	0.000822831	0.00973601	3017.72	3024.83	2509.25	2625.46	2634.21
ENSG00000110427.14_KIAA1549L	1490.23	0.33141	0.0992202	3.34015	0.000837337	0.0099002	1362.46	1172.45	1644.79	1458.93	1812.51
ENSG00000088280.18_ASAP3	467.287	-0.360967	0.108094	-3.33937	0.000839674	0.00991294	562.321	538.211	417.532	431.355	387.016
ENSG00000197442.9_MAP3K5	605.91	0.35139	0.105223	3.33948	0.000839355	0.00991294	530.611	486.326	685.077	615.925	711.611
ENSG00000242852.6_ZNF709	79.1523	0.530944	0.159082	3.33755	0.000845211	0.00997082	31.7098	57.306	83.101	95.3958	128.249
ENSG00000179222.17_MAGED1	14741.3	-0.195469	0.0585784	-3.33688	0.000847236	0.00998724	16295.7	15704.2	14460.6	14052.2	13193.7
ENSG00000136770.10_DNAJC1	1050.98	0.289043	0.0866541	3.33559	0.000851172	0.0100261	944.952	889.791	1085.38	1138.53	1196.23
ENSG00000119725.17_ZNF410	1167.72	0.268623	0.0805839	3.33345	0.000857756	0.0100961	1020	1041.57	1274.89	1288.88	1213.26
ENSG00000144674.16_GOLGA4	9137.43	0.271944	0.0816002	3.33264	0.000860274	0.0101182	8216.01	7886.54	9588.04	8919.51	11077.1
ENSG00000118496.4_FBXO30	1418.28	0.289607	0.0869191	3.33192	0.000862494	0.0101367	1289.53	1185.61	1525.21	1434.05	1657.02
ENSG00000073350.13_LLGL2	290.624	-0.42126	0.126489	-3.33041	0.000867171	0.0101841	347.751	363.196	239.169	273.745	229.259
ENSG00000129480.12_DTD2	910.882	-0.282127	0.0848356	-3.32557	0.000882374	0.0103549	1016.83	1040.03	827.97	827.455	842.13
ENSG00000163235.15_TGFA	129.559	0.501147	0.150718	3.32507	0.000883961	0.0103658	101.471	82.0869	160.122	156.574	147.543
ENSG00000179119.14_SPTY2D1	1465.4	0.319241	0.096081	3.32263	0.000891745	0.0104493	1256.77	1252.99	1591.08	1421.61	1804.56
ENSG00000172992.11_DCAKD	896.045	-0.29159	0.087775	-3.32202	0.000893686	0.0104642	1013.66	1019.89	817.836	850.267	778.573
ENSG00000137801.10_THBS1	72469.4	-0.201794	0.0607628	-3.321	0.000896941	0.0104945	81387.5	76356.3	67955.4	64724	71923.8
ENSG00000185127.6_C6orf120	1873.93	-0.233745	0.0704197	-3.31931	0.00090239	0.0105505	2110.82	2028.17	1789.71	1730.6	1710.36
ENSG00000138138.13_ATAD1	1700.05	0.246677	0.0743528	3.31766	0.00090776	0.0106054	1477.68	1558.1	1806.94	1768.97	1888.55
ENSG00000173706.12_HEG1	7054.85	-0.188054	0.056739	-3.31437	0.000918497	0.0107228	7753.05	7511.73	6554.85	6543.95	6910.68
ENSG00000178988.10_MRFAP1L1	1673.54	-0.233631	0.0705105	-3.31343	0.000921605	0.0107512	1839.17	1855.47	1553.58	1541.89	1577.57
ENSG00000008513.14_ST3GAL1	1893.32	0.252488	0.0762503	3.3113	0.000928626	0.010809	1616.14	1754.03	2102.86	1935.91	2057.66
ENSG00000122257.18_RBBP6	3683.75	0.298314	0.0900883	3.31135	0.000928473	0.010809	3314.73	3077.48	3734.48	3707.99	4584.05
ENSG00000156304.14_SCAF4	2144.5	0.221056	0.0667572	3.31134	0.000928513	0.010809	1955.44	1928.27	2325.82	2252.17	2260.81
ENSG00000107362.13_ABHD17B	708.487	0.312263	0.0943546	3.30946	0.000934759	0.0108724	628.911	590.871	758.044	797.385	767.223
ENSG00000120709.10_FAM53C	2646.32	0.213869	0.0646351	3.30886	0.000936764	0.0108876	2347.58	2460.28	2830.5	2830.77	2762.46
ENSG00000135655.13_USP15	1878.29	0.253571	0.0766867	3.30658	0.000944421	0.0109685	1676.39	1666.52	2013.68	1895.47	2139.37
ENSG00000187522.13_HSPA14	1533.85	0.298776	0.0904494	3.30324	0.000955749	0.0110919	1363.52	1297.13	1619.46	1534.63	1854.5
ENSG00000131773.13_KHDRBS3	1232.87	0.257516	0.07801	3.30106	0.000963208	0.0111695	1087.65	1101.98	1329.62	1349.02	1296.11
ENSG00000197872.11_FAM49A	388.236	-0.372568	0.11287	-3.30087	0.000963856	0.0111695	469.305	451.478	336.458	328.701	355.238
ENSG00000086730.16_LAT2	79.6938	0.522541	0.15835	3.29992	0.000967127	0.0111992	56.0207	46.4643	92.2219	101.617	102.145
ENSG00000003436.14_TFPI	778.937	0.385668	0.116912	3.29878	0.000971061	0.0112365	683.875	588.548	845.198	759.019	1018.05
ENSG00000114450.9_GNB4	3076.71	0.246422	0.0747267	3.29765	0.000974981	0.0112735	2692.16	2803.35	3152.77	3163.62	3571.67
ENSG00000010539.11_ZNF200	369.54	0.390713	0.118504	3.29703	0.000977123	0.01129	322.383	279.56	409.425	433.429	402.906
ENSG00000197332.8_ZNF833P	43.3906	0.51787	0.157121	3.29599	0.000980751	0.0113236	24.3109	21.6833	61.8191	58.067	51.0726
ENSG00000267059.2_AC005943.2	604.631	-0.40405	0.122605	-3.29555	0.000982305	0.0113332	621.512	839.455	474.284	521.566	566.338
ENSG00000196411.9_EPHB4	2065.18	-0.278085	0.0844153	-3.29424	0.000986867	0.0113775	2341.24	2316.24	2003.55	1979.46	1685.39
ENSG00000108352.11_RAPGEFL1	257.51	-0.425687	0.129253	-3.29343	0.000989734	0.0114022	319.212	313.634	197.618	231.231	225.854
ENSG00000169379.15_ARL13B	567.744	0.350075	0.106321	3.29262	0.00099259	0.0114268	478.818	473.161	575.627	633.553	677.563
ENSG00000100647.7_SUSD6	740.829	0.335261	0.101883	3.29066	0.000999511	0.011498	568.663	684.574	837.091	817.086	796.732
ENSG00000145555.14_MYO10	9236.33	0.259351	0.0788421	3.28949	0.00100368	0.0115375	8019.41	8365.9	9829.23	8967.21	10999.9
ENSG00000135119.14_RNFT2	369.43	-0.397267	0.120778	-3.28924	0.00100457	0.0115393	455.564	435.216	356.726	307.963	291.681
ENSG00000111181.12_SLC6A12	10.959	0.374205	0.113814	3.28786	0.00100951	0.0115797	1.05699	0.774405	15.2014	20.7382	17.0242
ENSG00000138018.17_EPT1	3051.07	0.222221	0.0675884	3.28785	0.00100956	0.0115797	2796.81	2724.36	3243.98	3091.03	3399.16
ENSG00000172780.16_RAB43	913.131	0.409239	0.124548	3.2858	0.00101693	0.0116558	683.875	775.179	925.259	1284.73	896.607
ENSG00000132510.10_KDM6B	1046	0.277745	0.0845524	3.28489	0.00102023	0.0116767	879.419	955.616	1135.04	1113.64	1146.3
ENSG00000138081.19_FBXO11	2895.81	0.22836	0.0695159	3.285	0.00101981	0.0116767	2617.12	2605.87	3119.33	2904.39	3232.33
ENSG00000169621.9_APLF	133.511	0.486117	0.148021	3.28411	0.00102305	0.0116918	96.1864	96.8006	155.054	161.758	157.757
ENSG00000223953.4_C1QTNF5	1234.65	-0.406979	0.123916	-3.2843	0.00102235	0.0116918	1391	1603.79	1195.84	1177.93	804.676
ENSG00000075618.17_FSCN1	12793.9	-0.246656	0.0751458	-3.28236	0.00102941	0.0117561	13734.6	14685.8	12227	12665.9	10656
ENSG00000176014.12_TUBB6	13333.3	-0.231912	0.070681	-3.2811	0.00103402	0.0118002	14406.8	15012.6	13031.7	12948.9	11266.6
ENSG00000044446.11_PHKA2	991.321	-0.274155	0.0835772	-3.28026	0.00103713	0.0118194	1134.15	1097.33	920.192	884.485	920.441
ENSG00000169554.16_ZEB2	2912.45	0.221315	0.0674692	3.28023	0.00103721	0.0118194	2720.7	2553.21	3077.78	2999.78	3210.76
ENSG00000112640.14_PPP2R5D	2096.81	-0.244561	0.0745833	-3.27902	0.00104167	0.0118616	2323.27	2330.96	1992.4	2027.16	1810.24
ENSG00000134548.9_SPX	44.8286	0.510245	0.155636	3.27845	0.00104377	0.011877	26.4248	19.3601	46.6177	59.1039	72.6365
ENSG00000164104.11_HMGB2	6692.64	-0.197157	0.0601629	-3.27705	0.00104897	0.0119274	7319.68	7220.55	6150.49	6640.38	6132.11
ENSG00000174151.14_CYB561D1	401.131	-0.383186	0.116946	-3.27661	0.0010506	0.0119374	497.844	460.771	378.008	318.332	350.698
ENSG00000135837.15_CEP350	2105.57	0.286365	0.0874531	3.27449	0.00105852	0.0120187	1879.33	1798.94	2155.56	2138.11	2555.9
ENSG00000129515.18_SNX6	5199.24	0.208445	0.0636717	3.27375	0.00106132	0.0120418	4897.05	4578.28	5454.27	5320.39	5746.23
ENSG00000215193.12_PEX26	2886.04	-0.213032	0.065094	-3.27267	0.00106535	0.0120788	3179.44	3134.79	2764.63	2592.28	2759.05
ENSG00000086991.12_NOX4	733.112	0.308011	0.0941739	3.27067	0.00107294	0.0121561	652.165	612.554	768.178	809.828	822.836
ENSG00000128266.8_GNAZ	630.63	-0.332993	0.101828	-3.27014	0.00107492	0.0121698	729.326	733.361	525.969	611.778	552.719
ENSG00000073849.14_ST6GAL1	909.628	-0.285294	0.0872602	-3.26947	0.0010775	0.0121812	1031.63	1026.86	796.554	866.858	826.24
ENSG00000142784.15_WDTC1	2167.2	-0.235355	0.0719893	-3.26931	0.00107809	0.0121812	2363.44	2426.21	2111.98	2021.98	1912.38
ENSG00000163029.15_SMC6	2162.91	0.256687	0.0785151	3.26927	0.00107825	0.0121812	1980.81	1862.44	2227.51	2235.58	2508.23
ENSG00000143337.18_TOR1AIP1	2368.44	0.239562	0.0734059	3.26353	0.00110033	0.0124218	2158.38	2088.57	2509.25	2397.34	2688.69
ENSG00000112473.16_SLC39A7	5413.3	-0.206052	0.0632141	-3.25959	0.00111573	0.0125865	5768.01	6038.03	5357.99	4981.32	4921.12
ENSG00000134294.13_SLC38A2	30146.6	-0.226094	0.069393	-3.25817	0.00112135	0.0126409	34463.3	31883	26961.2	26859.1	30566.4
ENSG00000061337.15_LZTS1	1046.19	-0.278684	0.0855973	-3.25576	0.00113088	0.0127392	1214.49	1146.89	961.742	996.472	911.361
ENSG00000164050.12_PLXNB1	3618.72	-0.231341	0.0710799	-3.25467	0.00113525	0.0127793	4000.72	3983.54	3442.61	3552.46	3114.29
ENSG00000089916.17_GPATCH2L	2807.43	0.262581	0.0806886	3.25425	0.00113692	0.012789	2525.16	2445.57	2831.52	2898.17	3336.74
ENSG00000123191.13_ATP7B	668.082	-0.309739	0.0952187	-3.25293	0.00114223	0.0128395	783.232	748.075	610.083	582.744	616.275
ENSG00000197296.5_FITM2	451.515	-0.359951	0.110728	-3.25076	0.00115098	0.0129286	546.466	517.302	376.995	387.805	429.009
ENSG00000116128.9_BCL9	1193.83	-0.264273	0.081311	-3.25016	0.00115342	0.0129468	1347.67	1327.33	1072.21	1155.12	1066.85
ENSG00000103319.11_EEF2K	1456.21	-0.252151	0.0775867	-3.24992	0.00115437	0.0129482	1596.06	1646.38	1332.66	1294.07	1411.87
ENSG00000171570.10_RAB4B-EGLN2	216.018	-0.442663	0.136272	-3.24837	0.00116069	0.0130098	275.875	264.072	197.618	182.496	160.027
ENSG00000141696.12_P3H4	1450.04	-0.253416	0.0780362	-3.24741	0.00116461	0.0130444	1547.44	1682.78	1369.14	1312.73	1338.1
ENSG00000162104.9_ADCY9	710.219	-0.316104	0.0973999	-3.24542	0.00117277	0.0131265	821.284	812.351	682.037	641.848	593.577
ENSG00000124813.20_RUNX2	458.592	-0.372213	0.114711	-3.24479	0.00117539	0.0131344	558.093	530.467	354.7	424.097	425.605
ENSG00000140545.14_MFGE8	13838.3	-0.192356	0.0592857	-3.24456	0.00117633	0.0131344	14735.5	15265.8	13492.8	13359.6	12338
ENSG00000140830.8_TXNL4B	491.989	0.359359	0.110746	3.24491	0.00117489	0.0131344	408	410.435	549.278	499.791	592.442
ENSG00000144218.18_AFF3	2589.74	-0.221591	0.0682986	-3.24444	0.00117681	0.0131344	2966.98	2723.58	2436.28	2430.52	2391.33
ENSG00000012232.8_EXTL3	3461.81	-0.23718	0.0731497	-3.24239	0.00118532	0.0132199	3791.44	3865.83	3417.28	2962.46	3272.05
ENSG00000165588.16_OTX2	1178	-0.274604	0.084727	-3.24104	0.00119092	0.0132731	1325.47	1327.33	1066.13	1153.05	1018.05
ENSG00000049192.14_ADAMTS6	846.538	0.297371	0.0918303	3.23827	0.00120256	0.0133933	774.776	695.416	913.098	906.26	943.14
ENSG00000125170.10_DOK4	1272.68	-0.281091	0.0868436	-3.23675	0.001209	0.0134555	1418.49	1456.66	1213.07	1216.3	1058.9
ENSG00000106089.11_STX1A	342.903	0.389721	0.120421	3.23631	0.00121086	0.0134571	282.217	274.914	418.545	372.251	366.587
ENSG00000167074.14_TEF	253.243	-0.429428	0.132685	-3.23645	0.00121028	0.0134571	323.44	302.792	198.632	241.6	199.75
ENSG00000132561.13_MATN2	2590.12	-0.250959	0.0775615	-3.23561	0.00121384	0.0134807	2975.44	2793.28	2456.55	2526.95	2198.39
ENSG00000168675.18_LDLRAD4	32.6882	0.493253	0.152492	3.2346	0.00121811	0.0135187	14.7979	16.2625	45.6042	42.5134	44.2629
ENSG00000060138.12_YBX3	5164.09	0.185855	0.0574732	3.23377	0.00122167	0.0135485	4637.03	4874.88	5364.07	5508.07	5436.39
ENSG00000127481.14_UBR4	12342.5	0.210867	0.0652484	3.23175	0.00123034	0.0136351	11491.6	10968.7	13234.3	12191	13827
ENSG00000150764.13_DIXDC1	911.533	-0.277287	0.0858691	-3.22918	0.00124146	0.0137198	1050.65	1005.18	839.118	816.049	846.669
ENSG00000159842.14_ABR	10412.1	-0.163364	0.0505899	-3.22919	0.00124143	0.0137198	11020.2	11270.7	10048.1	9798.81	9922.83
ENSG00000177728.14_KIAA0195	1841.78	-0.233375	0.0722672	-3.22933	0.00124079	0.0137198	2080.16	1988.67	1761.34	1728.53	1650.21
ENSG00000213676.10_ATF6B	2784.06	-0.232357	0.0719433	-3.22972	0.0012391	0.0137198	3093.82	3052.7	2727.13	2633.75	2412.89
ENSG00000105708.8_ZNF14	208.819	0.434747	0.134641	3.22893	0.00124255	0.0137221	167.005	157.204	235.115	238.49	246.283
ENSG00000063660.8_GPC1	9212.82	-0.317834	0.0984538	-3.22826	0.00124547	0.0137421	10189.4	11016.7	8875.6	9194.29	6788.11
ENSG00000125779.21_PANK2	1503.55	0.249722	0.0773608	3.22802	0.00124651	0.0137421	1277.91	1400.9	1622.5	1620.69	1595.73
ENSG00000144647.5_POMGNT2	803.891	-0.285689	0.088506	-3.22791	0.00124698	0.0137421	926.984	893.663	735.748	731.022	732.04
ENSG00000189042.13_ZNF567	257.874	0.420942	0.130422	3.22753	0.00124864	0.0137507	215.627	191.278	309.095	273.745	299.626
ENSG00000161714.11_PLCD3	3836.28	-0.247275	0.0766393	-3.22648	0.00125321	0.0137914	4278.71	4249.16	3723.33	3730.81	3199.41
ENSG00000196576.14_PLXNB2	19475.3	-0.169733	0.0526104	-3.22623	0.00125431	0.0137939	20596.6	21213.3	18718	18964.1	17884.5
ENSG00000112033.13_PPARD	2241.1	0.254585	0.0789252	3.22565	0.00125685	0.0138122	1971.29	2014.23	2585.25	2417.04	2217.68
ENSG00000083312.17_TNPO1	14080.8	0.232336	0.0720464	3.22481	0.00126056	0.0138361	12850.9	12488.8	14700.8	13897.7	16465.8
ENSG00000177283.5_FZD8	731.592	0.358709	0.111236	3.22476	0.00126078	0.0138361	634.196	584.676	915.125	819.16	704.801
ENSG00000182580.2_EPHB3	34.3561	0.489579	0.151836	3.2244	0.00126235	0.0138437	16.9119	15.4881	56.7519	38.3657	44.2629
ENSG00000170296.9_GABARAP	5118.86	-0.201173	0.0624047	-3.22369	0.00126552	0.0138688	5372.7	5766.99	4948.57	4852.74	4653.28
ENSG00000099875.14_MKNK2	2056.96	0.274786	0.0852706	3.22252	0.00127069	0.0139066	1822.26	1795.07	2272.1	2403.56	1991.83
ENSG00000259316.7_CTD-2116N17.1	15.7383	0.399595	0.124001	3.22251	0.00127074	0.0139066	4.22797	2.32321	29.3894	27.9966	14.7543
ENSG00000131584.18_ACAP3	1350.75	-0.309776	0.0961416	-3.22208	0.00127263	0.0139175	1620.37	1477.56	1211.05	1355.24	1089.55
ENSG00000243137.7_PSG4	734.144	-0.319011	0.0990675	-3.22014	0.0012813	0.0140026	821.284	869.657	670.889	705.1	603.791
ENSG00000157613.10_CREB3L1	5589.56	-0.228504	0.0710273	-3.21713	0.00129478	0.0141402	6087.23	6229.31	5048.89	5664.65	4917.72
ENSG00000169032.9_MAP2K1	3050.07	0.206944	0.0643415	3.21634	0.00129836	0.0141695	2732.33	2827.35	3310.87	3117.99	3261.83
ENSG00000106462.10_EZH2	1677.64	0.228002	0.070912	3.21528	0.00130316	0.014212	1518.9	1506.99	1783.63	1762.75	1815.91
ENSG00000143110.11_C1orf162	33.0175	0.484686	0.150841	3.21322	0.00131254	0.0143043	15.8549	14.7137	53.7116	45.6241	35.1833
ENSG00000153048.10_CARHSP1	1482.31	-0.257345	0.0801413	-3.21114	0.00132207	0.0143983	1608.74	1701.37	1405.62	1413.31	1282.49
ENSG00000115275.11_MOGS	2237.57	-0.293432	0.0914229	-3.20961	0.00132914	0.0144652	2451.17	2635.3	2074.49	2243.88	1783
ENSG00000135709.12_KIAA0513	577.914	-0.333805	0.104041	-3.2084	0.00133476	0.0145164	715.585	628.042	518.875	528.825	498.241
ENSG00000115207.13_GTF3C2	2425.16	-0.214789	0.0669658	-3.20745	0.00133918	0.0145544	2686.88	2625.23	2333.92	2291.57	2188.18
ENSG00000204923.3_FBXO48	73.6224	0.51035	0.159142	3.20689	0.0013418	0.0145727	39.1088	53.4339	89.1816	93.322	93.0655
ENSG00000123739.10_PLA2G12A	1134.64	-0.274567	0.0856427	-3.20595	0.00134616	0.01461	1342.38	1214.27	1048.9	998.546	1069.12
ENSG00000102287.16_GABRE	304.158	0.43742	0.136583	3.2026	0.00136192	0.0147709	250.508	219.157	321.256	311.073	418.795
ENSG00000128602.9_SMO	1046.18	-0.313856	0.0980299	-3.20164	0.00136649	0.0148103	1129.93	1273.12	988.092	996.472	843.265
ENSG00000072364.12_AFF4	10432.3	0.219236	0.0685136	3.19989	0.00137478	0.0148898	9455.87	9443.87	10884.2	10360.8	12016.8
ENSG00000134871.17_COL4A2	22569.5	-0.296611	0.0927166	-3.19911	0.00137851	0.0149199	24595.2	26798.3	21746.1	22559	17149
ENSG00000185760.15_KCNQ5	443.563	0.406115	0.127156	3.19384	0.00140393	0.0151847	353.036	354.677	507.727	417.875	584.497
ENSG00000204843.12_DCTN1	15109.4	-0.189363	0.0593228	-3.19209	0.00141249	0.0152667	15905.6	16810.8	14722.1	14556.2	13552.4
ENSG00000141934.9_PPAP2C	1493.39	-0.273458	0.0856729	-3.19188	0.00141349	0.0152671	1648.91	1712.98	1409.68	1453.75	1241.63
ENSG00000150991.14_UBC	52214.5	0.164239	0.0514858	3.18999	0.00142278	0.0153569	49594.1	47600.3	55411.2	52854.5	55612.3
ENSG00000276600.4_RAB7B	308.969	-0.399339	0.125207	-3.18944	0.00142549	0.0153756	357.264	390.3	291.867	260.265	245.148
ENSG00000047849.21_MAP4	24607.3	-0.152599	0.0478533	-3.1889	0.00142817	0.0153862	26378.3	26066.5	23835.8	23676.8	23079.1
ENSG00000106683.14_LIMK1	4075.75	-0.245897	0.0771118	-3.18884	0.00142843	0.0153862	4468.97	4586.03	3860.14	4055.36	3408.24
ENSG00000141279.15_NPEPPS	7201.75	-0.167412	0.0525096	-3.18822	0.00143152	0.0153909	7750.94	7695.26	6747.4	6860.2	6954.95
ENSG00000142197.12_DOPEY2	2221.08	-0.210343	0.0659763	-3.18816	0.0014318	0.0153909	2464.91	2390.59	2079.55	2107	2063.33
ENSG00000158109.14_TPRG1L	2694.24	-0.223044	0.0699553	-3.18838	0.00143073	0.0153909	2984.95	2938.87	2643.02	2530.06	2374.31
ENSG00000237172.3_B3GNT9	716.793	-0.291564	0.0914634	-3.18777	0.00143377	0.0154015	815.999	812.351	653.661	658.439	643.514
ENSG00000171206.13_TRIM8	5222.06	0.184566	0.0579275	3.18616	0.00144175	0.0154767	4860.06	4766.46	5527.23	5320.39	5636.14
ENSG00000141503.15_MINK1	3507.41	-0.207368	0.0651091	-3.18493	0.0014479	0.0155321	3730.13	3923.91	3165.95	3416.62	3300.42
ENSG00000159335.15_PTMS	8085.08	-0.276192	0.0867393	-3.18416	0.00145175	0.0155627	8455.95	9767.57	7129.46	8291.14	6781.3
ENSG00000139946.9_PELI2	251.512	0.41806	0.131347	3.18287	0.00145821	0.015614	214.57	182.76	284.773	299.667	275.792
ENSG00000153989.7_NUS1	3924.41	0.21507	0.0675723	3.18281	0.00145851	0.015614	3623.37	3501.86	4167.21	3935.08	4394.51
ENSG00000100105.17_PATZ1	915.987	-0.286104	0.0899186	-3.18181	0.00146359	0.0156578	1056.99	1019.12	857.359	867.895	778.573
ENSG00000126243.8_LRFN3	636.542	-0.38688	0.121637	-3.18061	0.00146966	0.015712	812.828	716.325	574.613	628.368	450.573
ENSG00000165731.17_RET	19.987	0.431247	0.135662	3.17884	0.00147868	0.0157869	4.22797	8.51845	29.3894	24.8859	32.9134
ENSG00000179954.14_SSC5D	1316.23	-0.301711	0.09491	-3.17892	0.00147826	0.0157869	1467.11	1538.74	1202.94	1316.88	1055.5
ENSG00000102699.5_PARP4	6328.65	0.198949	0.0625915	3.17853	0.00148024	0.0157929	6003.72	5581.91	6696.73	6430.92	6929.98
ENSG00000129910.7_CDH15	15.5427	0.408676	0.128737	3.17451	0.00150092	0.0159945	4.22797	3.87202	25.3357	23.849	20.429
ENSG00000259439.2_RP11-89K21.1	466.995	-0.356608	0.112337	-3.17446	0.00150117	0.0159945	587.689	512.656	390.17	407.506	436.954
ENSG00000004700.15_RECQL	3098.29	0.199097	0.0627254	3.17411	0.00150296	0.0159991	2815.83	2853.68	3271.34	3184.35	3366.25
ENSG00000166037.10_CEP57	1150.44	0.264091	0.0832102	3.17379	0.00150465	0.0159991	1048.54	986.592	1185.71	1255.7	1275.68
ENSG00000185551.12_NR2F2	7766.67	-0.182829	0.0576044	-3.17387	0.00150423	0.0159991	8447.49	8323.3	7119.33	7677.29	7265.92
ENSG00000154511.11_FAM69A	445.109	-0.36696	0.115664	-3.17264	0.0015106	0.0160515	541.181	513.43	368.888	363.956	438.089
ENSG00000167767.13_KRT80	1038.8	-0.335709	0.105821	-3.17243	0.00151168	0.0160522	1222.94	1194.13	875.601	1077.35	823.971
ENSG00000008517.16_IL32	284.211	0.424792	0.133925	3.17186	0.00151463	0.0160619	205.057	238.517	371.928	293.446	312.11
ENSG00000196850.5_PPTC7	1205.08	0.293764	0.0926153	3.17187	0.00151461	0.0160619	1010.49	1081.84	1305.29	1196.6	1431.17
ENSG00000155329.11_ZCCHC10	456.998	0.343843	0.108424	3.17128	0.00151769	0.0160835	398.487	370.166	489.485	507.05	519.805
ENSG00000100209.9_HSCB	325.077	0.387392	0.12218	3.17066	0.0015209	0.0161066	243.109	283.432	372.941	364.993	360.913
ENSG00000163293.11_NIPAL1	200.993	0.472943	0.149222	3.1694	0.00152757	0.0161554	171.233	121.582	197.618	247.822	266.712
ENSG00000170234.12_PWWP2A	1155.19	0.290314	0.0915979	3.16944	0.00152733	0.0161554	1023.17	988.141	1218.14	1167.56	1378.96
ENSG00000137770.13_CTDSPL2	1448.11	0.243103	0.0767356	3.16806	0.00153461	0.016219	1313.84	1276.99	1563.72	1487.97	1598
ENSG00000168575.9_SLC20A2	4414.85	-0.184914	0.058372	-3.16786	0.00153564	0.016219	4737.45	4803.63	4280.72	4066.77	4185.68
ENSG00000071967.11_CYBRD1	6292.17	-0.167729	0.0529847	-3.16562	0.00154753	0.0163249	6805.98	6692.41	5937.67	6025.49	5999.32
ENSG00000167797.7_CDK2AP2	1764.1	0.297077	0.093846	3.16558	0.00154774	0.0163249	1504.1	1555	2080.57	2014.72	1666.1
ENSG00000132688.10_NES	717.967	-0.352606	0.11141	-3.16493	0.0015512	0.0163504	813.885	872.754	606.03	733.096	564.068
ENSG00000065000.15_AP3D1	12174.4	0.156265	0.0493798	3.16455	0.00155324	0.0163545	11271.8	11472.8	12688.1	12587.1	12852.1
ENSG00000179335.18_CLK3	1980.03	0.215567	0.0681211	3.16447	0.00155366	0.0163545	1808.52	1785.78	2113	2132.93	2059.93
ENSG00000170145.4_SIK2	2191.45	-0.227357	0.071861	-3.16385	0.00155698	0.0163785	2530.44	2299.21	2041.04	2068.64	2017.93
ENSG00000132879.13_FBXO44	645.283	-0.325661	0.102946	-3.16341	0.00155932	0.0163897	702.901	789.119	588.801	607.63	537.964
ENSG00000198440.9_ZNF583	333.78	0.387602	0.122533	3.16326	0.00156013	0.0163897	283.274	258.651	381.049	345.291	400.636
ENSG00000146648.15_EGFR	6140.51	0.197432	0.0624241	3.16275	0.00156288	0.0164047	5739.48	5508.34	6327.84	6288.87	6838.05
ENSG00000204366.3_ZBTB12	261.429	-0.415076	0.131245	-3.16261	0.00156364	0.0164047	294.901	345.385	240.182	216.714	209.965
ENSG00000184203.7_PPP1R2	1491.63	0.241175	0.076265	3.16233	0.00156514	0.0164095	1370.92	1301	1585	1553.29	1647.94
ENSG00000117461.14_PIK3R3	1277.99	-0.267395	0.0845879	-3.16115	0.00157145	0.0164647	1499.87	1369.92	1114.77	1171.71	1233.69
ENSG00000158480.10_SPATA2	615.39	0.317811	0.100573	3.15999	0.00157772	0.0165194	557.036	497.168	678.996	660.512	683.237
ENSG00000151292.17_CSNK1G3	1581.55	0.231071	0.0731695	3.15802	0.00158846	0.0166151	1413.2	1433.42	1677.22	1649.73	1734.2
ENSG00000177119.15_ANO6	4086.78	0.204595	0.064788	3.15792	0.00158897	0.0166151	3769.24	3689.26	4207.75	4199.49	4568.16
ENSG00000111725.10_PRKAB1	1086.15	0.268409	0.0850341	3.15649	0.00159681	0.016686	962.921	953.292	1187.74	1222.52	1104.3
ENSG00000109586.11_GALNT7	4620.72	-0.180595	0.0572358	-3.15528	0.00160344	0.0167441	5018.61	4949.22	4287.81	4370.58	4477.36
ENSG00000115884.10_SDC1	3912.36	-0.231518	0.0734247	-3.15313	0.00161531	0.0168345	4190.98	4443.54	3842.92	3732.88	3351.49
ENSG00000124225.15_PMEPA1	1240.28	0.252619	0.080116	3.15316	0.00161513	0.0168345	1070.73	1135.28	1365.09	1337.62	1292.7
ENSG00000159164.9_SV2A	1200.44	-0.262623	0.0832822	-3.15341	0.00161376	0.0168345	1306.44	1381.54	1085.38	1166.53	1062.31
ENSG00000037757.13_MRI1	851.729	-0.282153	0.0895332	-3.15138	0.00162503	0.0169134	970.32	956.39	784.393	809.828	737.715
ENSG00000204371.11_EHMT2	2548.02	-0.234008	0.0742523	-3.15152	0.00162421	0.0169134	2820.06	2811.09	2433.24	2487.55	2188.18
ENSG00000212719.10_C17orf51	1106.85	0.277825	0.088168	3.15108	0.00162667	0.0169193	910.072	1029.18	1234.35	1153.05	1207.58
ENSG00000175229.6_GAL3ST3	99.0538	-0.496613	0.157613	-3.15084	0.001628	0.016922	126.839	144.039	71.9533	92.2851	60.1521
ENSG00000116774.11_OLFML3	454.88	-0.389548	0.123657	-3.15023	0.00163143	0.0169464	510.528	583.901	399.29	445.872	334.809
ENSG00000124942.13_AHNAK	50395.7	-0.1946	0.0617916	-3.1493	0.00163664	0.0169893	55468.9	53917.2	46178.8	45448.9	50964.7
ENSG00000157168.18_NRG1	1799.19	0.256749	0.0815638	3.14782	0.0016449	0.0170638	1547.44	1644.84	1951.86	1790.75	2061.06
ENSG00000087589.16_CASS4	23.796	0.414806	0.131828	3.14657	0.00165197	0.0171259	9.51294	4.64643	24.3223	24.8859	55.6123
ENSG00000025708.12_TYMP	62.7886	0.499781	0.158953	3.14421	0.00166533	0.017253	38.0518	35.6226	94.2487	88.1375	57.8822
ENSG00000140022.9_STON2	513.316	-0.343953	0.109459	-3.14229	0.00167631	0.017348	626.797	573.834	417.532	460.389	488.027
ENSG00000176058.11_TPRN	960.021	-0.387226	0.123233	-3.14222	0.0016767	0.017348	1126.76	1180.97	856.346	990.25	645.784
ENSG00000154330.12_PGM5	3284.1	-0.204276	0.0650167	-3.1419	0.00167856	0.0173557	3532.47	3626.54	3233.85	3025.71	3001.93
ENSG00000087085.13_ACHE	43.1279	0.488633	0.155561	3.14109	0.00168319	0.0173923	17.9689	27.1042	61.8191	62.2147	46.5328
ENSG00000123358.19_NR4A1	258.49	0.436185	0.13891	3.14006	0.00168913	0.0174421	205.057	192.827	354.7	279.966	259.903
ENSG00000077238.13_IL4R	801.562	0.292838	0.0932956	3.13882	0.00169628	0.0175045	685.989	707.032	911.071	886.559	817.161
ENSG00000151502.10_VPS26B	2461.1	-0.2162	0.0688996	-3.13789	0.00170167	0.0175486	2772.49	2623.68	2362.3	2336.16	2210.87
ENSG00000165105.9_RASEF	384.436	0.35988	0.114699	3.13761	0.00170331	0.017554	313.927	323.701	420.572	453.13	410.85
ENSG00000163697.16_APBB2	3721.44	0.210927	0.0672398	3.13694	0.0017072	0.0175826	3520.85	3250.95	3983.78	3780.58	4071.05
ENSG00000164794.8_KCNV1	12.279	0.360759	0.115019	3.13653	0.0017096	0.0175958	0	3.09762	17.2283	21.7751	19.2941
ENSG00000155363.18_MOV10	2590.35	0.224929	0.0717477	3.13499	0.00171859	0.0176768	2323.27	2354.97	2727.13	2930.31	2616.05
ENSG00000124151.18_NCOA3	2959.78	0.260117	0.0829813	3.13465	0.0017206	0.0176842	2693.22	2550.89	3076.77	2943.79	3534.22
ENSG00000176927.14_EFCAB5	77.2145	0.49988	0.159478	3.13449	0.00172156	0.0176842	58.1347	37.9458	84.1145	91.2482	114.63
ENSG00000140403.12_DNAJA4	355.297	0.362107	0.115599	3.13244	0.00173358	0.0177763	298.072	290.402	387.129	400.248	400.636
ENSG00000172123.12_SLFN12	1074.13	0.277162	0.0884827	3.13239	0.00173391	0.0177763	980.89	904.505	1088.42	1190.37	1206.45
ENSG00000173039.18_RELA	3491.9	0.186034	0.0593873	3.13255	0.00173295	0.0177763	3187.89	3243.21	3699.01	3710.07	3619.34
ENSG00000132589.15_FLOT2	2980.74	-0.206077	0.0658316	-3.13037	0.00174585	0.017887	3289.36	3215.33	2819.35	2902.31	2677.34
ENSG00000136274.8_NACAD	486.466	-0.409187	0.130803	-3.12828	0.00175833	0.0180031	555.979	632.689	416.519	494.607	332.539
ENSG00000102471.13_NDFIP2	2701.7	0.196349	0.0627743	3.12786	0.00176086	0.0180036	2472.31	2478.1	2837.6	2817.29	2903.19
ENSG00000123329.17_ARHGAP9	17.7756	0.415298	0.132791	3.12746	0.00176326	0.0180036	6.34196	4.64643	30.4028	25.9228	21.564
ENSG00000152484.13_USP12	1668.59	0.254337	0.0813125	3.12789	0.00176063	0.0180036	1428	1535.64	1711.68	1746.16	1921.46
ENSG00000163312.10_HELQ	400.495	0.35002	0.111924	3.12732	0.0017641	0.0180036	326.611	342.287	454.015	432.392	447.169
ENSG00000172345.13_STARD5	149.143	0.481386	0.153925	3.12739	0.00176363	0.0180036	88.7875	120.033	152.014	214.641	170.242
ENSG00000160007.17_ARHGAP35	5378.01	-0.172387	0.0551936	-3.12331	0.0017883	0.0182388	5875.83	5686.45	5146.18	5114.05	5067.53
ENSG00000105647.14_PIK3R2	6025.31	-0.199279	0.0638251	-3.12226	0.0017947	0.0182922	6370.5	6735	5797.82	5860.62	5362.62
ENSG00000128849.10_CGNL1	345.182	-0.38715	0.124012	-3.12187	0.00179704	0.0182996	421.741	408.886	295.921	334.922	264.442
ENSG00000162704.15_ARPC5	8380.6	-0.163443	0.0523562	-3.12176	0.00179775	0.0182996	8900.94	9044.27	8030.4	8107.61	7819.78
ENSG00000143756.11_FBXO28	2188.45	0.23933	0.0767055	3.12012	0.00180778	0.0183898	1997.72	1924.4	2344.06	2183.74	2492.34
ENSG00000196776.14_CD47	2319.92	0.230408	0.0739142	3.11723	0.00182557	0.0185469	2153.1	2025.07	2394.73	2400.45	2626.26
ENSG00000197930.12_ERO1L	4816.56	0.236589	0.0758972	3.11723	0.00182557	0.0185469	4497.51	4147.71	4979.98	4847.56	5610.04
ENSG00000159459.11_UBR1	2126.89	0.246463	0.0791086	3.1155	0.00183632	0.0186439	2017.8	1781.13	2260.96	2188.92	2385.66
ENSG00000135363.11_LMO2	12.6649	0.367663	0.118019	3.11528	0.00183771	0.018646	1.05699	3.09762	24.3223	15.5537	19.2941
ENSG00000107929.14_LARP4B	4769.94	0.190501	0.0612038	3.11257	0.00185465	0.0188058	4452.06	4314.21	4948.57	4888	5246.85
ENSG00000101745.15_ANKRD12	1055.55	0.343957	0.110675	3.10782	0.00188473	0.0190739	919.585	851.845	1113.76	1019.28	1373.28
ENSG00000185361.8_TNFAIP8L1	360.687	-0.369479	0.118886	-3.10784	0.0018846	0.0190739	400.601	456.124	315.176	330.775	300.761
ENSG00000256525.6_POLG2	362.688	0.366658	0.117965	3.10818	0.00188243	0.0190739	316.041	282.658	386.116	418.912	409.715
ENSG00000111860.13_CEP85L	506.078	0.336422	0.108285	3.10682	0.00189112	0.019114	455.564	399.593	560.425	537.12	577.687
ENSG00000214357.8_NEURL1B	369.524	-0.375288	0.120791	-3.10693	0.00189044	0.019114	403.772	477.033	308.082	343.218	315.515
ENSG00000114923.16_SLC4A3	1158.35	-0.275574	0.088712	-3.10639	0.00189385	0.0191171	1250.42	1360.63	1065.11	1128.16	987.403
ENSG00000135486.17_HNRNPA1	37745	-0.197636	0.0636194	-3.10654	0.00189294	0.0191171	39220.8	42823	35266.3	37555.9	33858.8
ENSG00000070371.15_CLTCL1	712.652	0.292069	0.0941527	3.10208	0.00192169	0.0193609	639.481	600.164	797.567	761.093	764.953
ENSG00000100242.15_SUN2	2892.73	-0.231269	0.0745487	-3.10226	0.00192051	0.0193609	3094.88	3289.67	2840.64	2741.59	2496.88
ENSG00000126368.5_NR1D1	214.593	0.453119	0.146063	3.10221	0.00192084	0.0193609	160.663	159.527	238.155	306.926	207.695
ENSG00000105426.14_PTPRS	3903.96	-0.184842	0.0596151	-3.1006	0.00193132	0.019433	4303.02	4136.87	3767.92	3654.08	3657.93
ENSG00000164164.15_OTUD4	3406.33	0.265099	0.0854966	3.1007	0.00193064	0.019433	2915.19	3099.17	3399.04	3488.17	4130.07
ENSG00000119771.14_KLHL29	1546.3	0.247794	0.0799359	3.0999	0.00193585	0.0194661	1332.87	1424.13	1755.26	1626.91	1592.33
ENSG00000107104.18_KANK1	2633.63	-0.196246	0.0633156	-3.09949	0.00193853	0.0194806	2811.6	2908.66	2487.96	2494.81	2465.1
ENSG00000160803.7_UBQLN4	2504.28	-0.201837	0.0651389	-3.09856	0.00194465	0.0195296	2691.11	2762.3	2350.14	2413.93	2303.94
ENSG00000005882.11_PDK2	945.404	-0.289824	0.0936059	-3.09622	0.00196007	0.0196719	1136.27	1012.92	861.413	908.334	808.081
ENSG00000154914.16_USP43	134.19	0.459813	0.14855	3.09533	0.00196593	0.0197182	101.471	96.0262	149.987	167.98	155.488
ENSG00000008086.10_CDKL5	359.681	0.398135	0.128657	3.09454	0.00197119	0.0197584	316.041	260.974	453.002	359.808	408.58
ENSG00000173166.17_RAPH1	4640.76	0.215767	0.0697351	3.09409	0.00197418	0.0197757	4282.94	4136.87	4728.65	4744.91	5310.41
ENSG00000143178.12_TBX19	93.789	0.484809	0.156719	3.0935	0.00197811	0.0197899	68.7046	59.6292	107.423	126.503	106.685
ENSG00000162520.14_SYNC	1792.96	-0.268209	0.0866992	-3.09356	0.00197771	0.0197899	2193.26	1837.66	1592.09	1699.5	1642.27
ENSG00000160789.19_LMNA	29739.3	-0.218698	0.0707314	-3.09196	0.0019884	0.0198802	31742.6	33521.7	28778.3	29441	25212.8
ENSG00000175920.15_DOK7	377.245	-0.431384	0.139564	-3.09093	0.00199527	0.0199363	492.559	449.929	332.404	376.399	234.934
ENSG00000181744.8_C3orf58	1654.9	0.258914	0.0837848	3.09023	0.00200001	0.0199709	1464.99	1467.5	1775.52	1639.36	1927.14
ENSG00000134324.11_LPIN1	3472.82	0.18473	0.0598281	3.08769	0.0020172	0.020117	3238.63	3161.9	3634.15	3613.64	3715.81
ENSG00000149115.13_TNKS1BP1	3633.53	-0.267821	0.0867372	-3.08773	0.00201691	0.020117	4034.55	4128.35	3373.7	3701.77	2929.29
ENSG00000113013.12_HSPA9	15074.9	0.17779	0.0575879	3.08729	0.00201993	0.0201315	13757.8	14115.1	15854.1	15103.6	16544.1
ENSG00000198648.10_STK39	2423.27	0.205451	0.0665567	3.08686	0.00202283	0.0201477	2268.31	2152.85	2535.6	2543.54	2616.05
ENSG00000063438.16_AHRR	1191	-0.249338	0.0808423	-3.08425	0.00204067	0.0202868	1300.1	1350.56	1058.02	1137.49	1108.84
ENSG00000112297.14_AIM1	232.231	0.45346	0.147019	3.08436	0.00203992	0.0202868	151.15	192.827	270.585	220.862	325.729
ENSG00000172361.5_CFAP53	51.2241	0.489789	0.158801	3.0843	0.00204034	0.0202868	27.4818	32.525	68.9131	59.1039	68.0967
ENSG00000167615.16_LENG8	5977.8	-0.242465	0.0786352	-3.08341	0.00204642	0.0203311	6540.68	6722.61	4933.36	5724.79	5967.54
ENSG00000151466.11_SCLT1	592.906	0.343317	0.111362	3.08289	0.00205	0.0203539	488.331	505.686	615.15	609.704	745.659
ENSG00000163513.17_TGFBR2	3765.31	0.267466	0.0867695	3.08249	0.00205275	0.0203683	3512.39	3129.37	4014.19	3671.7	4498.92
ENSG00000132716.18_DCAF8	3679.51	-0.184182	0.0597688	-3.08158	0.00205906	0.0204181	3892.91	4056.33	3444.64	3481.95	3521.74
ENSG00000135414.9_GDF11	1484.16	-0.249873	0.0811721	-3.07831	0.00208181	0.0206306	1638.34	1667.29	1437.04	1408.13	1270
ENSG00000205659.10_LIN52	365.794	0.356524	0.115889	3.07643	0.00209497	0.020748	290.673	315.957	405.371	398.174	418.795
ENSG00000196338.12_NLGN3	24.6759	0.443047	0.144107	3.07442	0.00210912	0.0208749	10.5699	10.0673	29.3894	40.4395	32.9134
ENSG00000092978.10_GPATCH2	622.079	0.300596	0.0978034	3.07347	0.00211585	0.0209284	542.238	532.791	653.661	679.177	702.531
ENSG00000146872.17_TLK2	2284.31	0.234049	0.0761947	3.07172	0.00212832	0.0210385	2123.5	1981.7	2321.76	2392.15	2602.43
ENSG00000204851.6_PNMAL2	93.3011	-0.482403	0.157147	-3.06976	0.00214233	0.0211637	117.326	134.746	66.8862	83.9898	63.557
ENSG00000102181.19_CD99L2	2883.36	-0.201186	0.0655559	-3.06893	0.00214827	0.0212092	3061.05	3216.1	2795.03	2711.52	2633.07
ENSG00000026559.13_KCNG1	338.661	0.376672	0.122753	3.06854	0.00215108	0.0212102	282.217	271.042	398.277	401.285	340.484
ENSG00000205835.8_GMNC	12.9014	0.362744	0.11821	3.06864	0.00215035	0.0212102	3.17098	1.54881	21.282	24.8859	13.6193
ENSG00000212864.3_RNF208	367.32	-0.397123	0.129564	-3.06508	0.00217613	0.0214438	455.564	436.764	317.203	366.03	261.037
ENSG00000109756.8_RAPGEF2	2622.1	0.225445	0.0735679	3.06445	0.00218072	0.0214756	2358.15	2373.55	2672.41	2702.19	3004.2
ENSG00000214293.8_APTR	150.878	0.44444	0.145059	3.06387	0.00218497	0.021504	113.098	113.838	171.269	170.053	186.131
ENSG00000197780.9_TAF13	2037.21	0.234789	0.0766451	3.06332	0.00218894	0.0215296	1814.86	1843.08	2222.45	2019.9	2285.78
ENSG00000104825.16_NFKBIB	660.789	0.33069	0.107996	3.06205	0.00219825	0.0216076	542.238	576.157	730.681	805.68	649.189
ENSG00000127129.9_EDN2	117.441	-0.487866	0.159475	-3.05919	0.00221935	0.021788	144.808	188.18	89.1816	115.097	49.9376
ENSG00000165072.9_MAMDC2	2222.52	-0.217373	0.0710556	-3.05919	0.00221937	0.021788	2334.9	2537.72	2077.53	2034.42	2128.02
ENSG00000171612.6_SLC25A33	467.904	0.322708	0.105574	3.0567	0.00223788	0.0219561	398.487	398.044	513.808	518.456	510.726
ENSG00000166619.12_BLCAP	3034.11	-0.193383	0.0632846	-3.05577	0.00224484	0.0220106	3350.67	3233.91	2917.66	2781	2887.3
ENSG00000136478.7_TEX2	2323.17	-0.217943	0.0713353	-3.05519	0.00224917	0.0220394	2602.32	2496.68	2253.86	2207.58	2055.39
ENSG00000048392.11_RRM2B	2709.27	0.202166	0.0661836	3.05462	0.00225345	0.0220609	2506.13	2443.25	2798.07	2816.25	2982.64
ENSG00000141452.9_C18orf8	1033.69	0.259944	0.0851064	3.05434	0.00225558	0.0220609	923.813	906.828	1125.92	1057.65	1154.24
ENSG00000164305.17_CASP3	6248.4	0.167736	0.0549149	3.05448	0.00225453	0.0220609	5706.71	5900.97	6645.04	6436.11	6553.18
ENSG00000033030.13_ZCCHC8	884.024	0.271459	0.0889237	3.05272	0.00226776	0.0221251	788.517	766.661	950.595	915.593	998.752
ENSG00000138083.4_SIX3	1368.19	-0.265401	0.0869326	-3.05295	0.00226604	0.0221251	1522.07	1547.26	1195.84	1194.52	1381.23
ENSG00000149646.12_CNBD2	6.90164	-0.293593	0.0961627	-3.05309	0.00226501	0.0221251	14.7979	15.4881	1.01343	2.07382	1.13495
ENSG00000205923.3_CEMP1	55.4667	-0.469645	0.153835	-3.05291	0.00226636	0.0221251	72.9326	97.575	55.7385	23.849	27.2387
ENSG00000007545.15_CRAMP1L	1363.36	0.24079	0.0789203	3.05105	0.00228044	0.0222217	1234.57	1206.52	1428.93	1531.52	1415.28
ENSG00000141569.10_TRIM65	732.902	-0.323589	0.106059	-3.05104	0.00228049	0.0222217	814.942	881.273	694.198	700.952	573.148
ENSG00000143476.17_DTL	1121.76	0.24547	0.0804863	3.04984	0.00228966	0.0222973	998.859	1003.63	1212.06	1169.64	1224.61
ENSG00000128881.16_TTBK2	1072.54	0.294504	0.0965819	3.04927	0.00229399	0.0223256	933.325	926.188	1101.6	1091.87	1309.73
ENSG00000105825.11_TFPI2	380.851	0.367674	0.120605	3.04858	0.00229923	0.0223628	326.611	299.695	401.317	403.358	473.272
ENSG00000133247.13_SUV420H2	116.08	-0.46346	0.152066	-3.04776	0.00230553	0.0224102	151.15	151.783	99.3159	96.4327	81.7161
ENSG00000196233.11_LCOR	2413.22	0.238362	0.07828	3.04499	0.00232686	0.0226035	2155.21	2169.11	2562.96	2388.01	2790.83
ENSG00000105656.12_ELL	796.344	0.279924	0.0919371	3.04473	0.00232891	0.0226095	721.927	672.958	870.534	885.522	830.78
ENSG00000182400.14_TRAPPC6B	1102.93	0.281021	0.0923597	3.04268	0.00234478	0.0227496	921.699	1005.18	1144.16	1139.57	1304.05
ENSG00000081923.10_ATP8B1	6628.59	-0.166254	0.0546641	-3.04138	0.002355	0.0228347	7233.01	6981.26	6404.86	6197.62	6326.19
ENSG00000169946.13_ZFPM2	242.534	0.400228	0.131726	3.03834	0.00237886	0.0230518	200.829	185.857	296.934	262.339	266.712
ENSG00000164171.10_ITGA2	3055.32	0.463106	0.152479	3.03718	0.00238803	0.0231265	2216.52	2181.5	3673.67	2805.88	4399.05
ENSG00000162066.14_AMDHD2	686.564	-0.372893	0.122812	-3.03629	0.00239507	0.0231803	811.771	827.839	589.815	716.506	486.892
ENSG00000184384.13_MAML2	986.904	0.259539	0.0855083	3.03525	0.0024034	0.0232466	896.331	852.62	1101.6	1042.1	1041.88
ENSG00000103174.11_NAGPA	704.882	-0.279652	0.0921617	-3.03437	0.00241041	0.0233002	789.574	803.832	652.647	643.922	634.435
ENSG00000170340.10_B3GNT2	1091.45	0.24859	0.0819664	3.03282	0.00242277	0.0233949	974.548	970.329	1127.94	1189.34	1195.1
ENSG00000261618.1_RP11-79H23.3	16.3908	0.389205	0.128333	3.03277	0.00242319	0.0233949	6.34196	3.09762	19.2551	24.8859	28.3736
ENSG00000107338.9_SHB	2343.65	-0.264784	0.087353	-3.0312	0.00243583	0.0235026	2575.89	2683.31	2208.26	2348.6	1902.17
ENSG00000141052.17_MYOCD	65.6674	0.482981	0.15948	3.02848	0.00245788	0.0237008	33.8238	48.0131	78.0339	78.8053	89.6607
ENSG00000100644.16_HIF1A	15388	0.21427	0.0707596	3.02814	0.00246063	0.0237128	14469.2	13465.4	15973.6	15289.3	17742.6
ENSG00000137834.14_SMAD6	723.495	-0.308389	0.101851	-3.02785	0.002463	0.0237211	832.911	828.613	674.943	699.915	581.092
ENSG00000244005.12_NFS1	1013.69	-0.253385	0.08372	-3.02657	0.00247344	0.023807	1159.52	1103.53	953.635	941.515	910.226
ENSG00000156958.14_GALK2	429.077	0.338913	0.112069	3.02414	0.00249342	0.0239701	372.062	350.031	475.297	500.828	447.169
ENSG00000275052.4_SMEK2	2902.39	0.21969	0.0726421	3.02427	0.0024923	0.0239701	2696.39	2557.86	2992.65	2963.49	3301.56
ENSG00000198938.2_MT-CO3	162527	-0.19506	0.0645417	-3.02223	0.00250921	0.0241071	174871	178074	145490	148166	166031
ENSG00000160469.16_BRSK1	513.64	0.331244	0.1097	3.01954	0.00253159	0.0243073	427.025	441.411	598.936	588.966	511.86
ENSG00000111077.17_TNS2	767.643	-0.349848	0.115927	-3.01782	0.002546	0.0244307	965.035	842.553	704.332	761.093	565.203
ENSG00000185504.16_FAAP100	1537.95	-0.310667	0.103005	-3.01604	0.00256103	0.02456	1750.38	1785.78	1431.97	1560.55	1161.05
ENSG00000221866.9_PLXNA4	125.406	0.465579	0.154393	3.01554	0.0025652	0.024585	88.7875	89.0566	172.283	120.282	156.622
ENSG00000163507.13_KIAA1524	1687.26	0.248795	0.0825267	3.01472	0.00257214	0.0246365	1570.69	1436.52	1746.14	1739.94	1943.03
ENSG00000038382.17_TRIO	11846.8	-0.152427	0.0505679	-3.0143	0.00257572	0.0246557	12550.7	12698.7	11275.4	11141.6	11567.4
ENSG00000016864.16_GLT8D1	1726.58	-0.211147	0.0700704	-3.01336	0.00258374	0.0247176	1904.7	1872.51	1605.27	1609.29	1641.13
ENSG00000166851.14_PLK1	3270.82	-0.194029	0.0643983	-3.01294	0.00258726	0.0247362	3533.53	3566.91	3173.04	3137.69	2942.91
ENSG00000065809.13_FAM107B	4159.11	-0.207975	0.0690554	-3.01171	0.00259781	0.0248069	4578.9	4505.49	3717.25	3800.28	4193.62
ENSG00000115239.21_GPR75-ASB3	697.58	0.311667	0.103482	3.01179	0.0025971	0.0248069	618.341	577.706	777.299	690.583	823.971
ENSG00000108604.15_SMARCD2	2022.45	-0.216452	0.0719028	-3.01034	0.00260954	0.0249037	2162.61	2271.33	1838.36	1976.35	1863.58
ENSG00000063176.15_SPHK2	1194	-0.320542	0.106519	-3.00926	0.00261887	0.0249674	1362.46	1398.58	1133.01	1187.26	888.662
ENSG00000104205.12_SGK3	567.605	0.316294	0.105109	3.0092	0.00261938	0.0249674	461.906	506.461	590.828	614.888	663.943
ENSG00000068366.19_ACSL4	8646.85	0.185115	0.0615276	3.00865	0.00262411	0.0249974	7959.16	7968.63	8765.13	8873.89	9667.47
ENSG00000135835.10_KIAA1614	157.076	0.439323	0.14609	3.00721	0.00263661	0.0251013	131.067	106.093	174.309	186.644	187.266
ENSG00000260804.3_PKI55	1017.43	-0.266799	0.0887283	-3.00692	0.00263911	0.0251098	1184.89	1101.98	986.065	882.411	931.79
ENSG00000256087.6_ZNF432	660.838	0.313968	0.10444	3.00619	0.0026454	0.0251545	597.201	534.339	689.131	694.731	788.787
ENSG00000110315.6_RNF141	2017.38	-0.215392	0.0716589	-3.00579	0.00264889	0.0251611	2191.15	2229.51	1823.16	1859.18	1983.88
ENSG00000198720.12_ANKRD13B	555.491	-0.322151	0.107178	-3.00575	0.00264929	0.0251611	673.305	613.329	488.472	538.157	464.193
ENSG00000197417.7_SHPK	811.296	-0.277172	0.0922408	-3.00487	0.00265693	0.0252136	920.642	912.249	771.218	760.056	692.317
ENSG00000226067.6_LINC00623	55.0427	0.452959	0.150748	3.00475	0.00265803	0.0252136	11.6269	41.8179	78.0339	64.2885	79.4462
ENSG00000203668.1_CHML	1989.38	-0.229552	0.0764078	-3.0043	0.00266194	0.0252355	2166.84	2220.99	1766.4	1804.23	1988.42
ENSG00000132664.11_POLR3F	783.173	0.278743	0.0927924	3.00395	0.00266503	0.0252496	693.388	677.604	847.225	806.717	890.932
ENSG00000173473.10_SMARCC1	8284.38	-0.174962	0.0582854	-3.00181	0.00268381	0.0254123	8882.98	8947.47	7754.75	7590.19	8246.51
ENSG00000117707.15_PROX1	19.7021	0.407864	0.135959	2.99991	0.00270056	0.0255554	6.34196	7.74405	25.3357	35.255	23.8339
ENSG00000114115.9_RBP1	1630.37	-0.270676	0.0902681	-2.99858	0.00271239	0.025652	1790.55	1879.48	1463.39	1662.17	1356.26
ENSG00000143545.8_RAB13	4134.18	-0.217529	0.0725905	-2.99666	0.00272958	0.025799	4274.48	4794.34	3925	4018.03	3659.06
ENSG00000168214.20_RBPJ	6187.83	0.221528	0.0739354	2.99623	0.00273337	0.0258194	5645.4	5542.42	6272.1	6235.98	7243.22
ENSG00000168016.13_TRANK1	592.735	0.296743	0.0990605	2.99557	0.00273933	0.0258602	507.357	518.077	623.258	664.66	650.324
ENSG00000272168.5_CASC15	139.314	0.445861	0.148886	2.99465	0.0027476	0.0259226	96.1864	109.965	165.189	149.315	175.917
ENSG00000033867.16_SLC4A7	6787.21	0.258909	0.0864944	2.99336	0.00275924	0.0260169	5996.33	6023.32	6863.94	6677.71	8374.76
ENSG00000102178.12_UBL4A	1006.97	-0.320498	0.107084	-2.99296	0.00276284	0.0260352	1111.96	1216.59	961.742	982.992	761.549
ENSG00000107798.17_LIPA	2436.76	0.206064	0.0688679	2.99216	0.00277015	0.0260884	2272.54	2169.88	2500.13	2555.99	2685.28
ENSG00000100823.11_APEX1	6712.59	-0.161526	0.0539917	-2.99169	0.00277437	0.026097	7066	7297.22	6458.57	6443.37	6297.81
ENSG00000172828.12_CES3	12.3436	0.350991	0.117322	2.99169	0.00277436	0.026097	3.17098	1.54881	24.3223	14.5168	18.1591
ENSG00000124226.10_RNF114	2021.56	0.228068	0.0762529	2.99094	0.00278124	0.0261459	1816.97	1826.05	2299.47	2136.04	2029.28
ENSG00000143199.17_ADCY10	14.1337	0.345732	0.115649	2.98949	0.0027944	0.0262541	4.22797	0.774405	29.3894	12.4429	23.8339
ENSG00000141867.17_BRD4	5762.96	0.169338	0.0566515	2.98912	0.00279783	0.0262706	5320.91	5375.92	5857.61	6066.97	6193.4
ENSG00000176945.16_MUC20	74.0353	0.475546	0.159152	2.988	0.00280811	0.0263391	53.9067	43.3667	85.1279	102.654	85.1209
ENSG00000242516.1_LINC00960	302.078	0.372476	0.124659	2.98796	0.00280848	0.0263391	243.109	250.133	364.834	339.07	313.245
ENSG00000135932.10_CAB39	3276.39	0.201156	0.0673645	2.98609	0.0028257	0.0264848	3081.14	2907.12	3474.03	3313.97	3605.72
ENSG00000258947.6_TUBB3	25821.7	-0.175181	0.0586888	-2.98491	0.00283664	0.0265716	27837	27751.6	25796.8	24549.9	23173.3
ENSG00000188725.7_SMIM15	2284.48	0.227452	0.076217	2.98427	0.00284253	0.0266109	1996.66	2118.77	2438.31	2283.28	2585.41
ENSG00000170100.13_ZNF778	475.74	0.351748	0.117909	2.98321	0.00285243	0.0266877	430.196	361.647	506.714	495.644	584.497
ENSG00000056277.15_ZNF280C	480.239	0.372823	0.125045	2.9815	0.0028684	0.0267876	421.741	362.421	500.633	484.238	632.165
ENSG00000122359.17_ANXA11	5922.13	-0.205399	0.0688938	-2.98139	0.00286943	0.0267876	6358.87	6563.86	5821.13	5741.38	5125.41
ENSG00000160094.14_ZNF362	671.651	-0.301043	0.100976	-2.98134	0.00286991	0.0267876	733.554	802.283	594.882	653.254	574.282
ENSG00000178802.17_MPI	764.117	-0.294473	0.0987619	-2.98165	0.00286702	0.0267876	820.227	920.767	730.681	701.989	646.919
ENSG00000100201.18_DDX17	19098.1	-0.199967	0.0670876	-2.98069	0.00287603	0.0268192	21369.2	20201.1	17083.3	17398.3	19438.2
ENSG00000197119.12_SLC25A29	1623.67	-0.289033	0.0969708	-2.98061	0.00287672	0.0268192	1822.26	1868.64	1434	1686.02	1307.46
ENSG00000178695.5_KCTD12	143.515	0.435157	0.146076	2.97898	0.00289206	0.0269463	109.927	106.868	172.283	162.795	165.702
ENSG00000187193.8_MT1X	868.262	0.318418	0.106896	2.97878	0.00289403	0.0269487	756.808	723.294	897.897	865.821	1097.49
ENSG00000137575.11_SDCBP	9737.99	0.157365	0.0528498	2.97759	0.00290523	0.027037	9221.21	8959.86	10052.2	10031.1	10425.6
ENSG00000172795.15_DCP2	1360.66	0.24558	0.0824832	2.97734	0.00290766	0.0270436	1241.97	1186.39	1437.04	1385.31	1552.61
ENSG00000185189.15_NRBP2	1968.99	-0.232304	0.0780318	-2.97704	0.00291047	0.0270538	2147.81	2202.41	1749.18	1978.43	1767.11
ENSG00000169432.14_SCN9A	1108.39	0.251317	0.0844975	2.97426	0.00293699	0.0272842	998.859	972.653	1192.8	1129.2	1248.44
ENSG00000186205.12_MARC1	387.231	-0.33827	0.113759	-2.97357	0.00294354	0.0273289	469.305	436.764	353.686	348.402	327.999
ENSG00000163527.9_STT3B	10880	0.179862	0.060515	2.97219	0.00295682	0.0274361	10147.1	9945.68	11294.6	10918.7	12094
ENSG00000110925.6_CSRNP2	1844.33	0.208437	0.0701491	2.97135	0.00296498	0.0274955	1712.33	1646.38	1990.37	1943.17	1929.41
ENSG00000155545.19_MIER3	1052.05	0.266852	0.0898251	2.9708	0.00297027	0.0275284	929.098	924.639	1093.49	1080.46	1232.55
ENSG00000198642.6_KLHL9	2164.75	-0.22729	0.0765228	-2.97022	0.00297584	0.0275637	2486.05	2286.82	1969.09	1939.02	2142.78
ENSG00000084093.15_REST	3559.07	0.250333	0.0842892	2.96994	0.00297862	0.0275732	3230.17	3103.04	3615.91	3549.35	4296.9
ENSG00000124839.12_RAB17	83.7479	-0.469431	0.158155	-2.96817	0.00299578	0.0277072	100.414	126.228	69.9265	64.2885	57.8822
ENSG00000167595.14_PROSER3	1309.62	-0.243722	0.0821142	-2.96809	0.00299661	0.0277072	1421.66	1486.86	1140.11	1269.18	1230.28
ENSG00000101966.12_XIAP	2375.18	0.235063	0.0792407	2.96644	0.00301271	0.0277987	2043.17	2217.12	2461.61	2410.82	2743.16
ENSG00000127325.18_BEST3	208.24	0.418672	0.141134	2.96649	0.00301217	0.0277987	176.518	146.363	251.33	210.493	256.498
ENSG00000143498.17_TAF1A	180.176	0.420975	0.141917	2.96635	0.00301358	0.0277987	142.694	135.521	223.967	212.567	186.131
ENSG00000173212.4_MAB21L3	15.3768	0.375939	0.126717	2.96676	0.00300957	0.0277987	3.17098	5.42083	18.2417	22.812	27.2387
ENSG00000010322.15_NISCH	4746.71	-0.171257	0.0577564	-2.96516	0.00302523	0.0278899	5230.01	4973.23	4548.26	4488.79	4493.25
ENSG00000168961.16_LGALS9	10.8085	0.32679	0.110234	2.96451	0.00303167	0.0279329	1.05699	1.54881	15.2014	24.8859	11.3495
ENSG00000104142.10_VPS18	2732.36	-0.228106	0.0769921	-2.96272	0.00304934	0.0280778	2933.16	3092.2	2760.58	2483.4	2392.47
ENSG00000204580.11_DDR1	2226.22	-0.248383	0.0838407	-2.96256	0.00305096	0.0280778	2378.24	2578.77	2159.61	2158.85	1855.64
ENSG00000136859.9_ANGPTL2	771.086	-0.268243	0.090569	-2.96176	0.00305889	0.0281178	858.279	875.852	717.507	721.69	682.102
ENSG00000172534.13_HCFC1	7745.02	-0.16742	0.056525	-2.96187	0.00305779	0.0281178	8154.71	8461.15	7630.09	7207.57	7271.6
ENSG00000119899.12_SLC17A5	1346.12	-0.265373	0.089638	-2.9605	0.00307137	0.0282161	1428	1592.95	1256.65	1136.45	1316.54
ENSG00000131471.6_AOC3	23.3253	0.422728	0.142808	2.96011	0.00307525	0.0282352	10.5699	9.29286	27.3625	34.2181	35.1833
ENSG00000055483.19_USP36	2307.47	0.210083	0.070995	2.95913	0.00308513	0.0282817	2142.53	2055.27	2531.54	2324.75	2483.26
ENSG00000083857.13_FAT1	23652.8	-0.195322	0.0660079	-2.95907	0.00308571	0.0282817	26261	25118.6	21895.1	20958	24031.3
ENSG00000113163.15_COL4A3BP	1821.23	-0.211249	0.0713861	-2.95924	0.00308397	0.0282817	2012.52	1972.41	1685.33	1664.24	1771.65
ENSG00000081014.10_AP4E1	1297.56	0.225445	0.0762144	2.95803	0.00309609	0.0283401	1169.04	1171.67	1362.05	1393.61	1391.44
ENSG00000127603.23_MACF1	37835.4	-0.199243	0.067363	-2.95775	0.00309896	0.0283401	42286.1	40047.6	34317.7	33848.9	38676.7
ENSG00000127666.9_TICAM1	681.354	0.337346	0.114056	2.95772	0.00309927	0.0283401	547.523	597.066	767.164	849.23	645.784
ENSG00000165915.13_SLC39A13	3087.91	-0.245782	0.0830957	-2.95782	0.0030982	0.0283401	3371.81	3496.44	3023.05	3018.45	2529.79
ENSG00000177150.12_FAM210A	764.168	0.272042	0.0920076	2.95673	0.00310917	0.0284141	664.849	677.604	859.386	822.271	796.732
ENSG00000100413.16_POLR3H	1675.3	-0.252234	0.0853308	-2.95595	0.00311709	0.0284699	1877.22	1861.67	1682.29	1549.15	1406.2
ENSG00000155438.11_NIFK	2083.39	0.222187	0.0751848	2.95521	0.00312455	0.0285215	1957.55	1809.01	2230.55	2109.08	2310.75
ENSG00000132481.6_TRIM47	627.326	-0.345304	0.116878	-2.9544	0.00313274	0.0285796	729.326	744.977	583.734	620.073	458.518
ENSG00000177628.15_GBA	3862.72	-0.200289	0.0677999	-2.95411	0.0031357	0.0285901	4272.37	4139.19	3856.09	3599.12	3446.83
ENSG00000174799.10_CEP135	915.873	0.306647	0.10381	2.95393	0.00313755	0.0285904	833.968	740.331	930.326	947.737	1127
ENSG00000176170.13_SPHK1	2513.38	0.257049	0.0870861	2.95167	0.00316064	0.0287841	2208.06	2247.32	2921.71	2812.1	2377.71
ENSG00000158769.17_F11R	1258.8	-0.226224	0.0766625	-2.95091	0.00316842	0.0288383	1373.03	1400.12	1171.52	1164.45	1184.88
ENSG00000173786.16_CNP	5095.6	0.238624	0.0808708	2.95068	0.00317075	0.0288428	4476.37	4650.3	5740.05	5791.15	4820.11
ENSG00000135334.8_AKIRIN2	1493.39	0.230818	0.0782421	2.95004	0.00317728	0.0288855	1319.13	1366.82	1657.97	1612.4	1510.61
ENSG00000091129.19_NRCAM	36.9495	0.449814	0.152574	2.94817	0.0031966	0.0290444	22.1969	16.2625	56.7519	37.3288	52.2075
ENSG00000180694.13_TMEM64	958.516	0.262128	0.0889203	2.9479	0.00319937	0.0290528	864.621	829.388	987.078	1015.14	1096.36
ENSG00000206077.10_ZDHHC11B	144.478	-0.447983	0.152002	-2.94722	0.00320643	0.0291001	170.176	202.894	93.2353	124.429	131.654
ENSG00000101265.15_RASSF2	1099.55	-0.247369	0.0839494	-2.94664	0.00321244	0.0291235	1228.23	1219.69	1074.23	975.733	999.887
ENSG00000151474.19_FRMD4A	3494.23	-0.172059	0.0583921	-2.94662	0.0032127	0.0291235	3743.87	3768.25	3324.04	3324.34	3310.64
ENSG00000088451.10_TGDS	340.802	0.355685	0.120727	2.94618	0.00321725	0.0291311	302.3	262.523	369.901	374.325	394.961
ENSG00000112200.16_ZNF451	2383.07	0.236078	0.0801299	2.94619	0.00321713	0.0291311	2219.69	2055.27	2487.96	2391.12	2761.32
ENSG00000198753.11_PLXNB3	3158.2	-0.203832	0.0692081	-2.9452	0.00322743	0.0292064	3468	3420.55	3060.55	3069.26	2772.67
ENSG00000172731.13_LRRC20	601.592	-0.354759	0.120472	-2.94475	0.00323219	0.0292327	733.554	689.995	569.546	585.855	429.009
ENSG00000125266.6_EFNB2	3372.09	0.191142	0.0649284	2.94389	0.0032411	0.0292965	3040.97	3150.28	3696.98	3418.7	3553.51
ENSG00000144959.9_NCEH1	5248.07	0.225302	0.0765443	2.94342	0.00324603	0.0293119	4726.88	4740.13	5686.34	5044.57	6042.45
ENSG00000165406.15_MARCH8	667.477	-0.277022	0.0941169	-2.94338	0.00324653	0.0293119	747.295	760.466	595.895	611.778	621.95
ENSG00000049759.16_NEDD4L	8899.43	0.190606	0.0647648	2.94305	0.00325	0.0293264	8269.92	8077.04	9607.29	8725.61	9817.28
ENSG00000090054.13_SPTLC1	2139.71	0.212442	0.0722155	2.94178	0.00326327	0.0294124	1972.35	1914.33	2172.79	2251.13	2387.93
ENSG00000127022.14_CANX	44672.8	0.211551	0.0719081	2.94196	0.00326146	0.0294124	41774.5	39407.1	46342	43876.9	51963.5
ENSG00000204681.10_GABBR1	879.905	-0.286692	0.0974663	-2.94144	0.00326686	0.0294279	1049.59	949.42	728.654	827.455	844.4
ENSG00000042429.10_MED17	1639.69	0.214056	0.0727873	2.94085	0.00327315	0.0294677	1527.36	1449.69	1746.14	1716.09	1759.17
ENSG00000023909.9_GCLM	1661.81	0.274322	0.0932926	2.94045	0.00327741	0.0294892	1504.1	1410.97	1730.93	1638.32	2024.74
ENSG00000214753.2_HNRNPUL2	4380.2	-0.24577	0.0835925	-2.9401	0.0032811	0.0295055	4355.87	5383.66	4097.29	4137.28	3926.91
ENSG00000134590.13_FAM127A	4286.32	-0.234157	0.0796534	-2.9397	0.00328527	0.0295262	4700.45	4781.18	4178.36	4230.6	3541.03
ENSG00000112137.16_PHACTR1	1887.88	-0.202724	0.0689755	-2.93907	0.00329202	0.029553	2016.74	2097.09	1764.38	1779.34	1781.86
ENSG00000149218.4_ENDOD1	5608.45	-0.164543	0.0559826	-2.93918	0.00329086	0.029553	5984.7	6032.61	5327.59	5216.7	5480.65
ENSG00000164266.10_SPINK1	12.0993	0.349922	0.119083	2.93848	0.00329829	0.0295925	2.11399	3.09762	17.2283	17.6275	20.429
ENSG00000091656.15_ZFHX4	4262.55	-0.236767	0.0806035	-2.93743	0.00330947	0.0296758	4949.9	4490.77	3724.35	3781.62	4366.14
ENSG00000163811.11_WDR43	3838.91	0.190796	0.0649939	2.93559	0.0033291	0.0298009	3483.85	3565.36	4056.75	3855.24	4233.35
ENSG00000185088.12_RPS27L	5337.31	-0.175665	0.0598362	-2.93576	0.00332733	0.0298009	5549.22	5942.01	5156.32	5073.61	4965.39
ENSG00000256537.4_SMIM10L1	1305.42	-0.225795	0.076916	-2.9356	0.00332902	0.0298009	1428	1447.36	1195.84	1201.78	1254.11
ENSG00000177238.13_TRIM72	10.113	0.31058	0.10582	2.935	0.00333553	0.0298415	0	1.54881	19.2551	9.3322	20.429
ENSG00000197063.10_MAFG	2065.94	0.21595	0.0735945	2.93432	0.00334281	0.0298897	1923.73	1822.95	2248.8	2077.97	2256.27
ENSG00000204604.9_ZNF468	436.47	0.331816	0.113205	2.93111	0.00337751	0.0301828	394.259	343.061	501.647	465.573	477.812
ENSG00000112031.15_MTRF1L	1816.94	0.235609	0.0804317	2.9293	0.00339725	0.0303344	1523.13	1733.12	1944.77	1873.7	2009.99
ENSG00000280179.1_CH507-42P11.6	7.60547	0.29028	0.0990987	2.9292	0.00339833	0.0303344	0	0	12.1611	14.5168	11.3495
ENSG00000058453.16_CROCC	1099.32	-0.245891	0.083976	-2.92811	0.00341029	0.0304239	1210.26	1235.18	994.172	1075.28	981.728
ENSG00000008294.20_SPAG9	5037.32	0.20235	0.0691138	2.92778	0.0034139	0.0304388	4625.4	4571.31	5271.85	4997.91	5720.13
ENSG00000050327.14_ARHGEF5	1136.4	-0.250165	0.0854733	-2.92682	0.00342449	0.0304987	1197.57	1334.3	1065.11	1066.98	1018.05
ENSG00000119900.7_OGFRL1	8670.09	0.223134	0.0762364	2.92687	0.00342395	0.0304987	7996.16	7661.96	8889.78	8572.15	10230.4
ENSG00000113240.12_CLK4	645.397	0.321943	0.110038	2.92573	0.00343648	0.0305709	570.777	525.821	629.338	713.395	787.652
ENSG00000127993.14_RBM48	401.337	0.353397	0.120784	2.92586	0.00343504	0.0305709	330.839	333.769	463.136	390.916	488.027
ENSG00000167910.3_CYP7A1	8.10418	0.289575	0.0989909	2.92527	0.00344163	0.0305994	0	0	15.2014	8.29529	17.0242
ENSG00000035862.12_TIMP2	29543.8	-0.136139	0.0465769	-2.92288	0.00346806	0.0308167	31669.6	30870.1	28285.8	28451.8	28441.7
ENSG00000173744.17_AGFG1	3698.84	0.208562	0.0713591	2.92271	0.00346999	0.0308167	3570.52	3164.22	3977.7	3775.39	4006.36
ENSG00000115525.16_ST3GAL5	316.455	-0.350501	0.119984	-2.92123	0.0034865	0.0309285	360.435	385.654	269.572	285.151	281.467
ENSG00000166579.15_NDEL1	1923.49	0.199489	0.0682887	2.92125	0.00348626	0.0309285	1783.15	1734.67	2040.03	2017.83	2041.77
ENSG00000146950.12_SHROOM2	415.704	-0.342612	0.117355	-2.91945	0.0035065	0.0310884	501.015	474.71	325.31	383.657	393.826
ENSG00000230733.2_AC092171.4	1083.4	-0.251748	0.0862642	-2.91834	0.00351898	0.0311814	1252.54	1166.25	1054.98	981.955	961.299
ENSG00000165259.13_HDX	317.648	0.357543	0.122551	2.91751	0.00352841	0.0312474	277.989	247.035	342.538	372.251	348.428
ENSG00000109846.7_CRYAB	3412.09	-0.236067	0.0809317	-2.91687	0.00353567	0.0312941	3726.96	3827.88	3508.49	2904.39	3092.73
ENSG00000185024.15_BRF1	1164.87	-0.254256	0.0871857	-2.91626	0.00354253	0.0313196	1259.94	1342.04	1129.97	1097.05	995.347
ENSG00000197860.9_SGTB	1252.74	0.251778	0.0863354	2.91627	0.00354241	0.0313196	1129.93	1096.56	1320.5	1263.99	1452.73
ENSG00000067248.9_DHX29	2971.52	0.224888	0.077144	2.91517	0.0035549	0.0314113	2750.3	2611.29	3120.34	2945.86	3429.81
ENSG00000023171.14_GRAMD1B	473.131	0.321976	0.110473	2.91452	0.00356234	0.0314579	405.886	398.044	564.479	508.086	489.162
ENSG00000039600.10_SOX30	14.3125	0.356529	0.122335	2.91436	0.00356418	0.0314579	4.22797	3.09762	29.3894	15.5537	19.2941
ENSG00000057252.12_SOAT1	5610.74	0.1925	0.0660803	2.91312	0.0035784	0.0315658	5212.04	5083.19	5887	5582.73	6288.73
ENSG00000109099.13_PMP22	1275.57	-0.2304	0.0791411	-2.91125	0.00359985	0.0317194	1421.66	1395.48	1149.23	1239.11	1172.4
ENSG00000180921.6_FAM83H	883.018	-0.318321	0.109342	-2.91125	0.00359982	0.0317194	1044.31	998.982	839.118	871.005	661.673
ENSG00000173638.18_SLC19A1	1102.59	-0.279784	0.0961199	-2.91078	0.00360523	0.031749	1164.81	1328.88	1025.59	916.63	1077.06
ENSG00000141258.12_SGSM2	2036.35	-0.2453	0.0842903	-2.91018	0.0036122	0.0317927	2241.88	2287.59	1829.24	2083.15	1739.87
ENSG00000177675.8_CD163L1	24.2967	0.413199	0.1421	2.90782	0.00363962	0.0320161	7.39896	13.1649	35.47	27.9966	37.4532
ENSG00000103042.8_SLC38A7	1157.62	-0.22964	0.0789995	-2.90685	0.00365085	0.0320611	1289.53	1266.15	1058.02	1093.94	1080.47
ENSG00000166123.13_GPT2	1061.53	0.235873	0.0811367	2.9071	0.00364796	0.0320611	943.895	959.488	1150.24	1128.16	1125.87
ENSG00000228223.2_HCG11	187.652	-0.426375	0.146673	-2.90697	0.00364951	0.0320611	249.451	223.803	144.92	131.688	188.401
ENSG00000151116.16_UEVLD	1189.24	0.230435	0.0793015	2.90581	0.00366306	0.0321503	1048.54	1089.59	1278.95	1243.26	1285.89
ENSG00000110906.12_KCTD10	4566.05	-0.171325	0.0589744	-2.90508	0.00367159	0.0321893	5028.12	4788.15	4425.64	4271.04	4317.33
ENSG00000174437.16_ATP2A2	19383.9	0.187986	0.0647068	2.9052	0.00367016	0.0321893	18294.4	17354.4	20670.9	19024.2	21575.3
ENSG00000156427.7_FGF18	176.624	-0.407265	0.14034	-2.90198	0.00370814	0.0324736	229.368	207.541	152.014	153.463	140.733
ENSG00000162337.11_LRP5	2408.8	-0.199931	0.0688905	-2.90215	0.00370613	0.0324736	2515.65	2726.68	2268.05	2297.8	2235.84
ENSG00000165209.18_STRBP	978.336	-0.242316	0.0835116	-2.90158	0.00371284	0.0324966	1105.62	1067.9	892.829	920.777	904.552
ENSG00000179010.14_MRFAP1	13229.7	-0.142923	0.0492916	-2.89953	0.00373722	0.0326918	13854	14231.2	12629.3	12800.7	12633.1
ENSG00000170004.16_CHD3	7573.04	-0.165342	0.0570413	-2.89863	0.003748	0.0327679	7843.95	8388.35	7163.92	7339.26	7129.73
ENSG00000047365.11_ARAP2	2274.08	0.234623	0.0809712	2.89761	0.00376012	0.0328557	2030.48	2049.08	2294.4	2324.75	2671.66
ENSG00000122299.11_ZC3H7A	3802.44	0.198978	0.0686862	2.89691	0.00376862	0.0329116	3481.74	3471.66	4083.1	3752.58	4223.13
ENSG00000155313.15_USP25	2364.69	0.235072	0.0811684	2.89611	0.00377822	0.0329606	2214.4	2028.94	2520.39	2339.27	2720.46
ENSG00000173442.11_EHBP1L1	1831.06	-0.27137	0.093702	-2.89609	0.00377841	0.0329606	1848.68	2275.98	1665.06	1783.49	1582.11
ENSG00000178921.13_PFAS	2413.33	-0.219029	0.0756371	-2.89579	0.00378208	0.0329743	2642.48	2659.31	2357.23	2334.09	2073.55
ENSG00000128346.10_C22orf23	582.728	-0.298417	0.10306	-2.89556	0.00378477	0.0329795	640.538	691.544	562.452	504.976	514.13
ENSG00000158079.14_PTPDC1	283.727	0.370534	0.127975	2.89536	0.00378722	0.0329825	236.767	225.352	306.055	298.63	351.833
ENSG00000166848.5_TERF2IP	3767.94	0.180798	0.0624802	2.89368	0.0038076	0.0331234	3408.8	3543.68	4044.59	3815.83	4026.79
ENSG00000183576.12_SETD3	1938.78	0.201942	0.0697834	2.89384	0.00380565	0.0331234	1756.72	1783.45	2084.62	2085.23	1983.88
ENSG00000145882.10_PCYOX1L	709.774	-0.282047	0.0974855	-2.89322	0.00381309	0.0331528	830.797	778.277	623.258	624.221	692.317
ENSG00000174106.2_LEMD3	1216.93	0.24475	0.0846281	2.89206	0.00382722	0.0332573	1049.59	1120.56	1378.26	1240.15	1296.11
ENSG00000171310.10_CHST11	729.76	0.286291	0.0990269	2.89104	0.0038397	0.0333473	621.512	647.402	819.863	725.838	834.185
ENSG00000050344.8_NFE2L3	1859.88	0.240191	0.0831463	2.88878	0.00386738	0.0335692	1716.56	1610.76	1849.5	1963.91	2158.67
ENSG00000157933.9_SKI	5478.85	-0.157327	0.0544775	-2.88793	0.00387788	0.0336418	5863.14	5841.34	5265.77	5143.08	5280.9
ENSG00000028277.20_POU2F2	935.507	0.254365	0.0880861	2.88768	0.0038809	0.0336494	821.284	837.906	1013.43	953.958	1050.96
ENSG00000039560.13_RAI14	12632.1	0.198983	0.0689282	2.88682	0.00389156	0.0337233	11754.8	11345.8	13226.2	12399.4	14434.2
ENSG00000067606.15_PRKCZ	528.312	0.322779	0.111846	2.88592	0.00390272	0.0338014	473.533	423.599	545.224	640.811	558.393
ENSG00000172830.12_SSH3	1080.3	-0.280374	0.0971841	-2.88497	0.00391448	0.0338845	1204.97	1242.15	1022.55	1066.98	864.829
ENSG00000170899.10_GSTA4	441.281	-0.317764	0.110167	-2.88439	0.00392169	0.0339284	509.471	511.107	370.914	419.949	394.961
ENSG00000102910.13_LONP2	3765.19	-0.181263	0.0628624	-2.88349	0.00393298	0.0340073	4176.18	3954.11	3564.22	3463.28	3668.14
ENSG00000176749.8_CDK5R1	310.184	0.378215	0.131193	2.88289	0.0039404	0.0340528	249.451	251.682	403.344	341.144	305.3
ENSG00000128591.15_FLNC	65377.1	-0.164493	0.0570771	-2.88195	0.00395228	0.0341367	68379	71724.6	65541.4	60275.6	60964.7
ENSG00000111961.16_SASH1	750.745	0.27493	0.0954055	2.8817	0.00395539	0.0341448	647.937	666.763	802.634	770.425	865.964
ENSG00000171105.13_INSR	540.328	-0.304885	0.105839	-2.88066	0.00396849	0.0342391	604.6	635.012	448.948	496.68	516.4
ENSG00000204237.4_OXLD1	377.535	-0.336878	0.116994	-2.87944	0.00398378	0.0343522	438.652	445.283	336.458	360.845	306.435
ENSG00000203880.11_PCMTD2	1316.28	-0.254613	0.0884362	-2.87906	0.00398868	0.0343756	1498.82	1442.72	1115.78	1200.74	1323.35
ENSG00000123562.16_MORF4L2	10065.2	-0.148265	0.0515035	-2.87874	0.00399267	0.0343823	10576.3	10840.1	9471.49	9642.24	9795.72
ENSG00000187244.10_BCAM	801.458	-0.330781	0.114909	-2.87865	0.00399382	0.0343823	889.989	978.848	748.923	800.495	589.037
ENSG00000153147.5_SMARCA5	6436.54	0.172613	0.0599769	2.878	0.00400211	0.0344348	6003.72	5922.65	6659.23	6513.88	7083.2
ENSG00000183248.11_PRR36	276.033	-0.426698	0.148335	-2.87658	0.00402005	0.0345702	312.87	385.654	186.471	296.557	198.615
ENSG00000116661.9_FBXO2	594.95	-0.330303	0.114844	-2.87611	0.00402612	0.034597	669.077	717.873	529.009	601.409	457.383
ENSG00000142303.13_ADAMTS10	384.088	-0.33502	0.116488	-2.876	0.00402756	0.034597	432.31	465.417	333.418	368.103	321.19
ENSG00000168502.17_MTCL1	2691.63	-0.220991	0.0768471	-2.87572	0.00403111	0.0346086	2896.16	3021.73	2451.48	2728.11	2360.69
ENSG00000111667.13_USP5	5102.29	-0.200924	0.06991	-2.87403	0.00405268	0.0347408	5340.99	5772.41	5091.46	4789.49	4517.08
ENSG00000114933.15_INO80D	1531.22	0.274739	0.0955922	2.87408	0.0040521	0.0347408	1330.76	1351.34	1577.91	1508.71	1887.41
ENSG00000169271.2_HSPB3	64.7431	-0.458323	0.159472	-2.874	0.00405313	0.0347408	90.9015	89.831	50.6714	55.9932	36.3183
ENSG00000137040.9_RANBP6	1295.12	-0.230877	0.0803471	-2.8735	0.00405954	0.0347768	1489.3	1373.02	1189.76	1184.15	1239.36
ENSG00000130309.10_COLGALT1	5324.12	-0.169838	0.0591172	-2.87291	0.00406708	0.0348225	5768.01	5670.19	5260.7	5017.61	4904.1
ENSG00000144645.13_OSBPL10	1257.63	0.23172	0.0806688	2.87249	0.00407253	0.0348501	1122.53	1136.83	1275.9	1361.46	1391.44
ENSG00000125843.10_AP5S1	644.016	-0.289613	0.100964	-2.86847	0.00412459	0.0352765	729.326	737.233	600.962	617.999	534.559
ENSG00000112406.4_HECA	786.333	0.267057	0.09311	2.86819	0.00412826	0.0352886	717.699	667.537	859.386	810.865	876.178
ENSG00000112984.11_KIF20A	3224.77	-0.198042	0.0690666	-2.86741	0.00413849	0.0353569	3555.73	3460.82	3220.67	2884.69	3001.93
ENSG00000134287.9_ARF3	10175.7	-0.158915	0.0554341	-2.86673	0.00414732	0.0354131	10566.8	11185.5	9951.86	9656.75	9517.65
ENSG00000172667.10_ZMAT3	5166.15	-0.26628	0.0929158	-2.86582	0.00415925	0.0354957	5856.8	5758.47	4605.01	4132.09	5478.38
ENSG00000121417.13_ZNF211	421.248	0.31527	0.110029	2.86533	0.00416575	0.0355319	357.264	360.873	468.203	473.868	446.034
ENSG00000114853.13_ZBTB47	658.02	-0.323779	0.113183	-2.86066	0.00422757	0.0360397	740.953	787.57	650.62	613.851	497.106
ENSG00000100796.17_SMEK1	2901.73	0.218854	0.0766162	2.85649	0.00428351	0.0364968	2702.73	2548.57	3016.97	2900.24	3340.14
ENSG00000167642.12_SPINT2	2425.32	-0.247233	0.0865944	-2.85507	0.00430275	0.0366409	2632.97	2768.5	2216.37	2488.59	2020.2
ENSG00000128159.11_TUBGCP6	1362.09	-0.220279	0.0771751	-2.85428	0.00431348	0.0367	1499.87	1494.6	1252.6	1325.17	1238.23
ENSG00000169583.12_CLIC3	340.723	-0.378509	0.132616	-2.85417	0.00431491	0.0367	433.367	390.3	319.23	323.516	237.204
ENSG00000215012.8_C22orf29	995.375	-0.242002	0.0847929	-2.85404	0.00431668	0.0367	1142.61	1069.45	926.273	901.076	937.465
ENSG00000270127.2_RP11-526I2.5	25.6723	0.416135	0.145826	2.85364	0.00432215	0.0367266	11.6269	12.3905	30.4028	34.2181	39.7231
ENSG00000118523.5_CTGF	20854.1	0.162782	0.0570547	2.85309	0.00432961	0.0367701	19601.9	19223.8	22730.2	20720.6	21994.1
ENSG00000065548.17_ZC3H15	4113.06	0.198994	0.0697518	2.85288	0.00433248	0.0367746	3844.29	3676.87	4293.89	4107.21	4643.06
ENSG00000171451.13_DSEL	4831.54	-0.239867	0.0841319	-2.85109	0.00435701	0.0369629	5203.58	5516.09	4526.98	3967.22	4943.82
ENSG00000176595.3_KBTBD11	2285	-0.185086	0.0649249	-2.85078	0.00436125	0.036979	2476.54	2465.71	2181.91	2130.85	2170.02
ENSG00000115993.11_TRAK2	2641.71	-0.177854	0.0624033	-2.85007	0.0043709	0.0370209	2831.69	2862.97	2494.04	2496.88	2522.98
ENSG00000186591.11_UBE2H	7196.22	-0.178176	0.0625154	-2.85011	0.00437039	0.0370209	8047.95	7469.91	6603.49	6736.81	7122.92
ENSG00000129315.9_CCNT1	2127.09	0.220326	0.0773241	2.84939	0.00438034	0.0370809	1933.24	1912.01	2162.65	2180.62	2446.94
ENSG00000198060.9_MARCH5	2298.64	0.197162	0.0692075	2.84885	0.00438773	0.0371035	2089.68	2117.22	2541.68	2358.97	2385.66
ENSG00000198833.6_UBE2J1	6617.34	0.160427	0.0563098	2.849	0.00438567	0.0371035	6283.83	6051.2	6982.51	6722.3	7046.88
ENSG00000092068.18_SLC7A8	2393.97	-0.203331	0.0713782	-2.84865	0.00439053	0.0371072	2517.76	2701.12	2265.01	2153.66	2332.31
ENSG00000112210.11_RAB23	1253.31	0.22257	0.0781488	2.84803	0.00439911	0.0371599	1158.47	1105.85	1352.93	1316.88	1332.43
ENSG00000066455.12_GOLGA5	1951	0.197247	0.0692632	2.84778	0.0044025	0.0371685	1814.86	1756.35	2054.22	2021.98	2107.59
ENSG00000101350.7_KIF3B	2661	-0.183789	0.0645739	-2.84618	0.00442473	0.0373362	2858.11	2893.18	2526.47	2442.96	2584.27
ENSG00000268043.7_NBPF12	818.71	0.275242	0.0967812	2.84396	0.00445563	0.0375767	773.719	662.116	909.044	879.301	869.368
ENSG00000099953.9_MMP11	333.334	-0.392402	0.138035	-2.84276	0.00447242	0.0376578	372.062	442.96	326.324	301.741	223.584
ENSG00000166432.14_ZMAT1	154.318	0.435802	0.153297	2.84286	0.00447103	0.0376578	127.896	98.3494	161.135	161.758	222.449
ENSG00000214900.8_LINC01588	12.8212	0.342617	0.120519	2.84286	0.00447113	0.0376578	4.22797	2.32321	17.2283	17.6275	22.6989
ENSG00000067836.12_ROGDI	426.148	-0.341326	0.120128	-2.84135	0.00449226	0.0377846	484.103	517.302	374.968	424.097	330.269
ENSG00000142686.7_C1orf216	849.267	-0.245781	0.0865014	-2.84135	0.00449228	0.0377846	950.237	940.128	779.326	790.126	786.517
ENSG00000075413.17_MARK3	3056.9	0.1897	0.0667753	2.84087	0.00449903	0.0378212	2788.35	2826.58	3242.97	3067.18	3359.44
ENSG00000139350.11_NEDD1	1597.37	0.224348	0.0789799	2.84057	0.0045033	0.0378369	1463.94	1417.94	1710.67	1599.95	1794.35
ENSG00000119938.8_PPP1R3C	328.536	0.345105	0.121536	2.83953	0.00451798	0.0379399	282.217	264.846	393.21	349.439	352.968
ENSG00000075643.5_MOCOS	99.871	0.440715	0.155246	2.83882	0.00452812	0.0380048	70.8186	72.7941	125.665	123.392	106.685
ENSG00000271992.1_RP11-42O15.3	11.3642	0.324648	0.11438	2.83834	0.0045349	0.0380415	2.11399	2.32321	23.3088	16.5906	12.4844
ENSG00000198824.5_CHAMP1	2005.7	0.198369	0.0699001	2.83789	0.00454124	0.0380743	1881.45	1788.1	2111.98	2076.93	2170.02
ENSG00000109920.12_FNBP4	3126.94	0.232513	0.0819434	2.83748	0.00454712	0.0381033	2767.21	2846.71	3082.85	3228.94	3709
ENSG00000136436.14_CALCOCO2	1666.73	0.227218	0.0801046	2.83651	0.00456091	0.0381952	1495.65	1505.44	1693.44	1723.35	1915.79
ENSG00000183955.12_SETD8	2369.02	0.19014	0.067038	2.8363	0.00456392	0.0381952	2172.12	2178.4	2463.64	2439.85	2591.08
ENSG00000197635.9_DPP4	3528.22	-0.194592	0.0686102	-2.8362	0.00456537	0.0381952	3788.27	3874.35	3201.42	3225.83	3551.24
ENSG00000125375.14_ATP5S	453.581	-0.321392	0.11333	-2.8359	0.00456961	0.0382104	525.326	526.595	365.847	407.506	442.629
ENSG00000144134.18_RABL2A	244.449	-0.36883	0.130078	-2.83546	0.00457601	0.0382233	304.414	281.883	201.672	208.419	225.854
ENSG00000148110.15_HIATL1	3174.17	0.211639	0.0746366	2.8356	0.00457404	0.0382233	2875.02	2889.3	3312.89	3147.03	3646.58
ENSG00000128928.8_IVD	2951.35	-0.17878	0.0631086	-2.83289	0.00461298	0.0384709	3261.88	3105.36	2771.72	2834.92	2782.89
ENSG00000166147.13_FBN1	27622.1	-0.166369	0.0587266	-2.83294	0.00461218	0.0384709	30132.8	29116.1	25859.6	25198	27803.9
ENSG00000185624.14_P4HB	31051	0.139796	0.0493437	2.83311	0.00460981	0.0384709	29277.7	29162.5	33019.5	31380	32415.2
ENSG00000080854.14_IGSF9B	128.749	-0.422718	0.149274	-2.83184	0.00462817	0.0385483	172.29	154.107	103.37	101.617	112.36
ENSG00000143570.17_SLC39A1	3702.19	-0.223839	0.0790465	-2.83174	0.00462962	0.0385483	3938.36	4214.31	3655.43	3590.82	3112.02
ENSG00000197808.11_ZNF461	195.006	0.391527	0.138255	2.83192	0.004627	0.0385483	156.435	152.558	237.142	205.308	223.584
ENSG00000250510.7_GPR162	119.771	-0.427018	0.150844	-2.83085	0.00464241	0.0386344	144.808	160.302	99.3159	92.2851	102.145
ENSG00000198301.11_SDAD1	2196.84	0.203317	0.0718337	2.83039	0.00464917	0.0386702	1948.04	2057.59	2322.78	2230.4	2425.38
ENSG00000160953.14_MUM1	1469.71	-0.232082	0.0820064	-2.83004	0.00465417	0.0386914	1639.4	1610.76	1326.58	1473.45	1298.38
ENSG00000141448.8_GATA6	796.615	0.260094	0.09191	2.82987	0.00465667	0.0386917	708.186	700.062	854.319	901.076	819.431
ENSG00000137269.14_LRRC1	1195.87	-0.230047	0.0813831	-2.82672	0.00470278	0.0390542	1347.67	1294.03	1084.37	1087.72	1165.59
ENSG00000165804.15_ZNF219	895.995	-0.341707	0.1209	-2.82636	0.0047081	0.0390778	1053.82	1053.97	872.561	884.485	615.141
ENSG00000147100.9_SLC16A2	3816.47	-0.198486	0.0702337	-2.82608	0.0047121	0.0390903	4295.62	4011.42	3728.4	3360.63	3686.3
ENSG00000141198.13_TOM1L1	1098.98	0.235825	0.0834583	2.82566	0.00471832	0.0391213	1011.54	959.488	1223.21	1150.97	1149.7
ENSG00000270189.1_RP11-258C19.7	67.4361	-0.449924	0.15928	-2.82473	0.00473207	0.0392146	98.3004	85.9589	51.6848	45.6241	55.6123
ENSG00000257335.8_MGAM	33.5643	0.4208	0.149006	2.82406	0.00474197	0.039276	11.6269	21.6833	36.4834	43.5503	54.4774
ENSG00000111011.17_RSRC2	2999.48	0.206201	0.0730398	2.82314	0.00475559	0.0393507	2780.95	2682.54	3118.32	3003.93	3411.65
ENSG00000175215.9_CTDSP2	3737.25	-0.182902	0.0647875	-2.82311	0.00475599	0.0393507	4119.1	3958.76	3653.41	3588.75	3366.25
ENSG00000169087.10_HSPBAP1	207.212	0.38675	0.13705	2.82197	0.00477297	0.0394704	160.663	168.82	216.873	234.342	255.363
ENSG00000134440.11_NARS	7776.9	0.169902	0.0602139	2.82164	0.00477792	0.0394775	7247.81	7179.51	8165.18	7756.1	8535.93
ENSG00000173894.10_CBX2	238.07	-0.383664	0.135975	-2.82157	0.00477885	0.0394775	293.844	284.981	210.793	227.084	173.647
ENSG00000111371.15_SLC38A1	10178.5	0.18897	0.0669889	2.82091	0.0047887	0.0395382	9416.76	9287.44	10539.6	10075.7	11573
ENSG00000159792.9_PSKH1	1540.65	-0.221521	0.0785479	-2.8202	0.00479934	0.0396053	1752.5	1638.64	1473.52	1475.52	1363.07
ENSG00000141542.10_RAB40B	185.521	-0.408168	0.144857	-2.81774	0.00483633	0.0398896	251.565	211.413	169.242	164.869	130.519
ENSG00000026103.19_FAS	786.101	0.265678	0.09433	2.81648	0.00485534	0.0400254	729.326	656.695	878.641	843.009	822.836
ENSG00000119574.12_ZBTB45	741.655	-0.277855	0.0987215	-2.81454	0.00488477	0.0402469	828.683	850.297	738.788	659.476	631.03
ENSG00000127585.11_FBXL16	205.95	-0.404671	0.143851	-2.81312	0.00490632	0.0403832	272.704	239.291	192.551	185.607	139.598
ENSG00000166479.9_TMX3	4422.39	0.202548	0.0720055	2.81294	0.00490901	0.0403832	4181.47	3889.84	4612.11	4412.06	5016.46
ENSG00000249859.7_PVT1	453.804	0.303401	0.107857	2.813	0.00490824	0.0403832	400.601	379.458	510.767	493.57	484.622
ENSG00000103197.16_TSC2	2843.89	-0.18833	0.0670227	-2.80994	0.00495506	0.0407407	3160.41	3002.37	2766.66	2712.56	2577.46
ENSG00000138613.13_APH1B	833.38	-0.246869	0.0878858	-2.80898	0.00496994	0.0408417	913.243	942.451	774.258	753.834	783.112
ENSG00000091039.16_OSBPL8	3682.98	0.210045	0.074784	2.80869	0.00497435	0.0408567	3318.96	3374.08	3863.18	3621.93	4236.75
ENSG00000110888.17_CAPRIN2	1440.28	0.268762	0.0957032	2.80829	0.00498052	0.040886	1289.53	1241.37	1409.68	1499.37	1761.44
ENSG00000121769.7_FABP3	1010.63	-0.281442	0.100283	-2.80647	0.00500873	0.0410961	1081.3	1210.39	940.461	1002.69	818.296
ENSG00000142611.16_PRDM16	1550.41	-0.235698	0.0840217	-2.8052	0.00502852	0.041237	1736.64	1697.5	1310.36	1489	1518.56
ENSG00000124575.6_HIST1H1D	9.23257	0.304164	0.108447	2.80471	0.00503617	0.0412782	1.05699	1.54881	14.188	13.4798	15.8892
ENSG00000054219.10_LY75	10.9177	0.303148	0.108096	2.80443	0.00504058	0.0412929	3.17098	0	20.2685	18.6644	12.4844
ENSG00000087087.18_SRRT	4988.69	-0.172189	0.0614248	-2.80325	0.005059	0.0414006	5246.92	5481.24	4788.44	4885.93	4540.92
ENSG00000104231.10_ZFAND1	815.571	0.261008	0.0931077	2.80329	0.00505839	0.0414006	681.761	756.594	854.319	877.227	907.956
ENSG00000113719.15_ERGIC1	10909.3	-0.146883	0.0524025	-2.80299	0.00506315	0.0414131	11308.8	11891.8	10538.6	10426.1	10381.3
ENSG00000152492.13_CCDC50	7024.44	0.179452	0.0640286	2.80269	0.00506785	0.04143	6600.93	6369.48	7453.76	6945.23	7752.81
ENSG00000148730.6_EIF4EBP2	6025.69	-0.15654	0.0558621	-2.80225	0.00507469	0.0414644	6464.57	6405.1	5719.78	5617.99	5921.01
ENSG00000229656.6_RP11-462L8.1	33.9973	0.428948	0.153146	2.80091	0.00509581	0.0416154	20.0829	17.0369	41.5505	42.5134	48.8027
ENSG00000153317.14_ASAP1	6207.43	0.188908	0.0674521	2.80062	0.00510038	0.0416311	5819.81	5587.33	6382.56	6226.65	7020.77
ENSG00000047634.14_SCML1	594.033	0.290906	0.103888	2.80019	0.00510726	0.0416656	492.559	535.114	602.989	657.402	682.102
ENSG00000198373.12_WWP2	1456.95	-0.223155	0.0797091	-2.79962	0.00511625	0.0417173	1634.11	1575.14	1381.3	1418.49	1275.68
ENSG00000083844.10_ZNF264	1138.69	0.282613	0.101	2.79813	0.00513989	0.0418884	993.574	988.915	1127.94	1165.49	1417.55
ENSG00000147799.11_ARHGAP39	457.837	0.322389	0.115245	2.79742	0.00515133	0.0419599	357.264	416.63	514.821	534.009	466.463
ENSG00000198910.12_L1CAM	1809.8	-0.220867	0.0789948	-2.79597	0.00517439	0.0421259	1989.26	1991.77	1655.94	1820.82	1591.19
ENSG00000185015.7_CA13	285.954	0.381342	0.136474	2.79425	0.0052021	0.0423296	221.969	234.645	300.988	285.151	387.016
ENSG00000068724.15_TTC7A	1024.81	-0.241864	0.0865652	-2.79401	0.00520583	0.0423381	1164.81	1113.59	954.648	994.398	896.607
ENSG00000149527.17_PLCH2	1590.51	-0.215221	0.0770368	-2.79374	0.00521016	0.0423514	1704.93	1783.45	1482.64	1560.55	1420.95
ENSG00000167202.11_TBC1D2B	4175.94	-0.163776	0.0586324	-2.79326	0.00521789	0.0423924	4557.76	4391.65	4051.68	3939.23	3939.4
ENSG00000186432.8_KPNA4	7199.8	0.17566	0.062947	2.7906	0.00526111	0.0427214	6699.23	6618.84	7655.43	7106.99	7918.52
ENSG00000137947.11_GTF2B	899.564	0.269958	0.0967783	2.78945	0.00527982	0.0428291	751.523	827.064	1045.86	976.77	896.607
ENSG00000144118.13_RALB	2751.89	0.192884	0.069146	2.78952	0.00527868	0.0428291	2525.16	2520.69	2869.01	2776.85	3067.76
ENSG00000162407.8_PPAP2B	796.863	-0.255448	0.0915884	-2.78909	0.00528563	0.0428542	921.699	861.913	723.587	714.432	762.683
ENSG00000196305.17_IARS	11530.2	0.16604	0.0595372	2.78885	0.00528958	0.0428641	11107.9	10324.4	12258.4	11589.6	12370.9
ENSG00000099810.18_MTAP	3411.21	0.222095	0.0796481	2.78846	0.00529593	0.0428935	3106.5	3052.7	3678.74	3278.71	3939.4
ENSG00000173848.18_NET1	2193.84	0.249374	0.089466	2.78737	0.00531385	0.0430165	2019.92	1881.03	2394.73	2090.41	2583.14
ENSG00000112208.11_BAG2	2103.7	-0.184698	0.0662765	-2.78678	0.00532349	0.0430723	2268.31	2281.4	1964.02	2009.53	1995.23
ENSG00000240849.10_TMEM189	1115.2	-0.242428	0.0870331	-2.78547	0.00534497	0.0432239	1276.85	1203.43	1018.49	1101.2	976.053
ENSG00000234545.7_FAM133B	1016.18	0.299462	0.107516	2.78527	0.00534834	0.043229	851.937	895.986	1017.48	1018.25	1297.24
ENSG00000281991.1_TMEM265	35.7862	0.419572	0.150772	2.78282	0.00538884	0.043534	22.1969	15.4881	35.47	45.6241	60.1521
ENSG00000165480.15_SKA3	954.504	0.241699	0.0868592	2.78265	0.00539168	0.0435346	825.512	878.175	1022.55	1056.61	989.673
ENSG00000143398.19_PIP5K1A	5735.68	0.162816	0.0585466	2.78097	0.00541972	0.0437161	5419.21	5258.21	6015.7	5795.3	6189.99
ENSG00000182795.12_C1orf116	13.7557	0.338752	0.121806	2.78108	0.00541787	0.0437161	2.11399	5.42083	24.3223	17.6275	19.2941
ENSG00000050820.16_BCAR1	8641.78	-0.223129	0.08028	-2.77938	0.0054463	0.0438285	9398.79	9631.27	8413.47	8681.02	7084.33
ENSG00000117500.12_TMED5	4926.94	0.18936	0.0681316	2.77933	0.00544706	0.0438285	4495.39	4554.28	4967.82	5032.13	5585.07
ENSG00000166189.7_HPS6	882.211	-0.279154	0.100421	-2.77983	0.00543879	0.0438285	966.092	1033.06	881.682	812.938	717.286
ENSG00000169255.13_B3GALNT1	736.187	0.272031	0.0978719	2.77946	0.00544489	0.0438285	685.989	606.359	828.984	766.277	793.327
ENSG00000204231.10_RXRB	1388.31	-0.236863	0.0852292	-2.77914	0.00545037	0.0438285	1445.97	1630.12	1355.97	1271.25	1238.23
ENSG00000216490.3_IFI30	96.8991	0.434281	0.156256	2.7793	0.00544768	0.0438285	70.8186	68.1476	110.464	130.651	104.415
ENSG00000114383.9_TUSC2	1293.34	-0.216953	0.0781261	-2.77696	0.00548696	0.0441002	1400.52	1438.84	1253.61	1194.52	1179.21
ENSG00000182150.15_ERCC6L2	886.648	0.26928	0.096985	2.77651	0.00549462	0.0441393	799.087	758.142	908.031	912.482	1055.5
ENSG00000020129.15_NCDN	2353.85	-0.210065	0.0757365	-2.77363	0.00554352	0.0444505	2547.35	2604.32	2348.11	2223.14	2046.31
ENSG00000163577.7_EIF5A2	1221.45	0.274892	0.0990974	2.77396	0.00553788	0.0444505	1072.85	1064.03	1337.72	1157.19	1475.43
ENSG00000164181.13_ELOVL7	196.061	0.381353	0.137488	2.77371	0.00554205	0.0444505	156.435	156.43	222.954	208.419	236.069
ENSG00000173611.17_SCAI	535.225	-0.292498	0.105459	-2.77356	0.00554466	0.0444505	613.056	608.682	482.391	451.056	520.94
ENSG00000077232.16_DNAJC10	7757.48	0.196443	0.070832	2.77337	0.00554793	0.0444541	7317.57	6882.14	8048.64	7676.25	8862.79
ENSG00000176407.17_KCMF1	2944.63	0.191482	0.069061	2.77266	0.00556005	0.0445058	2691.11	2711.97	3217.63	2918.91	3183.52
ENSG00000187479.5_C11orf96	49.0895	0.439128	0.15837	2.77281	0.0055575	0.0445058	28.5388	31.7506	53.7116	62.2147	69.2317
ENSG00000070019.4_GUCY2C	10.1865	0.307886	0.111067	2.77209	0.0055698	0.0445602	2.11399	1.54881	20.2685	14.5168	12.4844
ENSG00000110880.10_CORO1C	27752.3	-0.140486	0.0506847	-2.77176	0.00557533	0.0445602	29349.5	29514.1	26849.7	25754.8	27293.2
ENSG00000161202.17_DVL3	4628.38	-0.166788	0.0601737	-2.77178	0.00557513	0.0445602	5060.89	4871.78	4387.13	4547.89	4274.21
ENSG00000163349.21_HIPK1	2394.92	0.210404	0.0759728	2.76947	0.00561475	0.0448223	2131.96	2217.9	2538.64	2372.45	2713.65
ENSG00000174405.13_LIG4	1173.68	0.253132	0.0914047	2.76936	0.00561667	0.0448223	1069.68	1012.15	1166.45	1241.18	1378.96
ENSG00000267699.2_RP11-729L2.2	8.1014	0.264112	0.0953608	2.7696	0.00561246	0.0448223	0	0	18.2417	16.5906	5.67473
ENSG00000115657.12_ABCB6	466.964	-0.311267	0.112413	-2.76896	0.00562359	0.0448547	581.347	497.942	398.277	428.244	429.009
ENSG00000145779.7_TNFAIP8	713.888	0.257842	0.0931667	2.76754	0.00564816	0.0450279	643.709	619.524	790.473	762.13	753.604
ENSG00000145715.14_RASA1	3323.66	0.214939	0.0776727	2.76724	0.00565339	0.0450468	3076.91	2947.38	3497.34	3254.86	3841.79
ENSG00000166510.13_CCDC68	269.062	0.369129	0.133485	2.76533	0.00568656	0.0452881	202.943	231.547	279.706	287.224	343.889
ENSG00000187624.8_C17orf97	341.374	-0.327341	0.11839	-2.76494	0.00569338	0.0453196	392.145	404.239	302.001	322.479	286.006
ENSG00000110218.8_PANX1	1326.47	0.235786	0.0852906	2.7645	0.00570108	0.0453579	1245.14	1132.95	1466.43	1328.28	1459.54
ENSG00000134716.9_CYP2J2	56.2995	0.44035	0.159307	2.76416	0.00570687	0.045381	35.9378	36.397	79.0473	64.2885	65.8268
ENSG00000101049.14_SGK2	21.441	0.38437	0.139118	2.76291	0.00572888	0.045533	7.39896	10.8417	25.3357	35.255	28.3736
ENSG00000134755.14_DSC2	310.556	-0.334383	0.121136	-2.7604	0.00577308	0.0458612	365.72	362.421	290.854	260.265	273.522
ENSG00000061455.10_PRDM6	26.5146	0.402264	0.145806	2.7589	0.00579966	0.0460491	15.8549	10.0673	35.47	39.4026	31.7785
ENSG00000213722.8_DDAH2	1603.8	-0.278132	0.100824	-2.75858	0.00580523	0.04607	1688.02	1944.53	1546.49	1581.29	1258.65
ENSG00000119718.10_EIF2B2	1408.07	0.208471	0.0755844	2.75813	0.00581338	0.0461115	1297.99	1263.83	1521.15	1503.52	1453.87
ENSG00000094916.13_CBX5	13289.5	-0.17805	0.0645626	-2.75779	0.00581936	0.0461356	14491.4	14167	11954.4	12292.6	13542.2
ENSG00000130714.15_POMT1	1604.36	-0.206776	0.0750072	-2.75674	0.00583799	0.04626	1744.04	1761.77	1573.85	1448.56	1493.59
ENSG00000143107.8_FNDC7	10.4621	0.293676	0.106539	2.75651	0.00584212	0.0462695	2.11399	0.774405	25.3357	9.3322	14.7543
ENSG00000172081.13_MOB3A	1759.01	-0.19533	0.0708829	-2.75568	0.00585706	0.0463645	1951.21	1873.29	1686.34	1636.25	1647.94
ENSG00000103994.16_ZNF106	7966.95	-0.166145	0.0603035	-2.75514	0.00586671	0.0464175	8817.44	8273.74	7419.3	7415.99	7908.3
ENSG00000100154.14_TTC28	1223	-0.218786	0.0794558	-2.75355	0.00589526	0.0466199	1319.13	1367.6	1105.65	1146.82	1175.8
ENSG00000150527.16_CTAGE5	694.505	0.292594	0.106286	2.75288	0.00590731	0.0466917	607.771	592.42	696.225	723.764	852.344
ENSG00000151725.11_CENPU	1410.45	0.228149	0.0829137	2.75165	0.00592965	0.0468448	1240.91	1295.58	1396.5	1567.81	1551.47
ENSG00000164654.15_MIOS	1577.67	0.221655	0.0805712	2.75105	0.00594053	0.0469072	1423.77	1424.9	1759.31	1556.4	1723.98
ENSG00000110442.11_COMMD9	1013.75	-0.235654	0.0856706	-2.7507	0.00594674	0.0469095	1114.07	1132.18	911.071	994.398	917.036
ENSG00000118495.18_PLAGL1	715.694	0.277661	0.100942	2.7507	0.00594678	0.0469095	646.88	603.261	775.272	715.469	837.59
ENSG00000023902.13_PLEKHO1	1641.13	-0.242977	0.0884101	-2.74829	0.00599068	0.0472128	1751.44	1898.07	1521.15	1654.91	1380.09
ENSG00000113638.12_TTC33	369.79	0.328333	0.119482	2.74796	0.00599667	0.0472128	289.616	331.445	405.371	435.503	387.016
ENSG00000120948.15_TARDBP	7421.18	-0.152021	0.0553194	-2.74806	0.00599489	0.0472128	8130.4	7692.16	7022.04	7074.85	7186.48
ENSG00000197355.10_UAP1L1	672.503	-0.320592	0.116674	-2.74777	0.00600023	0.0472128	739.896	822.418	570.56	703.026	526.615
[truncated: 41 more rows]
