# Supplementary material for: Differential Susceptibility of Fetal Retinal Pigment Epithelial Cells, hiPSC- Retinal Stem Cells, and Retinal Organoids to Zika Virus Infection
Source: Viruses. 2023 Jan 1;15(1):142. doi: 10.3390/v15010142 (PMC9864143; doi:10.3390/v15010142)
Supplement: Supplementary file 1 [file viruses-15-00142-s001.zip › Table_S3.xlsx]

## Sheet: Sheet1
Gene	baseMean	log2FoldChange	lfcSE	stat	pvalue	padj	J_DC_hFRPE_72h_Mock_A	K_DC_hFRPE_72h_Mock_B	L_DC_hFRPE_72h_ZIKV_A	M_DC_hFRPE_72h_ZIKV_B	U_DC_hFRPE_72h_ZIKV_C
ENSG00000111331.12_OAS3	13913.9	5.45228	0.130811	41.6808	0	0	474.477	503.147	26157.9	23211.7	19222.4
ENSG00000119917.13_IFIT3	8599.96	6.55426	0.163395	40.1131	0	0	131.394	135.157	17164.8	13749.1	11819.3
ENSG00000119922.8_IFIT2	9427.49	8.42945	0.182936	46.0787	0	0	31.6318	40.8878	16997.7	15159.6	14907.6
ENSG00000126709.14_IFI6	11301.9	7.49104	0.134892	55.5337	0	0	90.0289	98.8122	19993.7	18166.5	18160.3
ENSG00000130589.16_HELZ2	4776.71	4.07611	0.0994192	40.9993	0	0	401.48	481.568	7774.95	7463.8	7761.75
ENSG00000141682.11_PMAIP1	5966.32	4.14501	0.0946362	43.7994	0	0	517.058	539.492	9057.27	9607.04	10110.7
ENSG00000162772.16_ATF3	5475.76	5.76505	0.132883	43.3844	0	0	142.343	165.823	8080.55	9245.02	9745.05
ENSG00000185745.9_IFIT1	12495.8	7.61828	0.165599	46.0043	0	0	90.0289	90.8618	24607.2	19865.9	17825.2
ENSG00000187608.8_ISG15	11207.3	6.1623	0.0993874	62.0028	0	0	238.455	256.685	18448.8	18073.1	19019.4
ENSG00000125347.13_IRF1	2601.34	3.58949	0.100248	35.8059	8.93493e-281	1.64438e-277	345.516	321.424	4074.04	4022.67	4243.06
ENSG00000137959.15_IFI44L	5398.09	7.16857	0.203203	35.2779	1.28119e-272	2.14354e-269	49.8809	48.8382	10982.9	8795.38	7113.48
ENSG00000138646.8_HERC5	2645.55	7.17403	0.208664	34.3808	4.88689e-259	7.49487e-256	21.8989	24.987	4523.15	4300.93	4356.8
ENSG00000115267.5_IFIH1	3835	4.78054	0.144301	33.129	1.13681e-240	1.60937e-237	200.74	222.611	7237.21	6142.8	5371.63
ENSG00000184979.9_USP18	2228.62	5.19123	0.157528	32.9542	3.67762e-238	4.8345e-235	90.0289	91.9976	4118.78	3572.07	3270.22
ENSG00000118898.15_PPL	1771.63	-3.44964	0.106723	-32.3234	3.2796e-229	4.02385e-226	3669.29	4144.44	355.402	360.095	328.947
ENSG00000196611.4_MMP1	7744.97	3.68782	0.118661	31.0786	4.68125e-212	5.38461e-209	1007.35	833.657	11254.7	11828.3	13800.9
ENSG00000213853.9_EMP2	4678.47	-2.67006	0.0867499	-30.7788	5.03686e-208	5.45285e-205	9015.06	9965.27	1532.2	1462.53	1417.27
ENSG00000185885.15_IFITM1	3402.64	8.64871	0.281237	30.7524	1.13618e-207	1.16168e-204	3.64982	9.08618	5732.87	5547.78	5719.83
ENSG00000137628.16_DDX60	2402	4.05687	0.132159	30.6969	6.25253e-207	6.0564e-204	197.09	243.055	4186.32	3913.87	3469.69
ENSG00000157601.13_MX1	15229.9	8.19218	0.273233	29.9824	1.66598e-197	1.53303e-194	38.9314	61.3317	29977.9	25162.4	20909.1
ENSG00000138642.14_HERC6	2758.49	4.47319	0.149452	29.9306	7.87922e-197	6.9052e-194	217.773	157.872	4962.13	4549.33	3905.37
ENSG00000068079.7_IFI35	1420.34	3.73645	0.125939	29.6687	1.94373e-193	1.62602e-190	150.859	173.773	2309.69	2311.74	2155.65
ENSG00000137965.10_IFI44	1977.23	6.24231	0.211224	29.553	6.01163e-192	4.81035e-189	27.982	40.8878	3864.68	3093.55	2859.04
ENSG00000163739.4_CXCL1	1824.31	5.22886	0.177192	29.5096	2.16828e-191	1.66271e-188	80.2961	61.3317	3425.71	2965.49	2588.71
ENSG00000169429.10_CXCL8	1663.14	4.62488	0.161269	28.678	7.18246e-181	5.28744e-178	99.7618	101.084	3079.59	2676.64	2358.62
ENSG00000271503.5_CCL5	2230.67	8.02723	0.281679	28.4978	1.24581e-178	8.81839e-176	4.86643	9.08618	3626.62	3700.12	3812.63
ENSG00000168672.3_FAM84B	11658.4	-2.80944	0.0995735	-28.2147	3.86016e-175	2.6312e-172	22133.7	26044.4	3537.14	3460.38	3116.25
ENSG00000120738.7_EGR1	3529.01	3.12355	0.111123	28.109	7.59475e-174	4.99192e-171	545.04	676.921	5250.84	5346.55	5825.68
ENSG00000116285.12_ERRFI1	5233.84	2.2957	0.0821189	27.9558	5.60599e-172	3.55768e-169	1472.09	1626.43	7825.6	7687.17	7557.9
ENSG00000221963.5_APOL6	1758.5	5.21529	0.190392	27.3925	3.37264e-165	2.069e-162	53.5307	80.6399	3422.33	2767.15	2468.85
ENSG00000156587.15_UBE2L6	1997.29	3.96665	0.145893	27.1887	8.83565e-163	5.24552e-160	195.874	189.674	3668.83	3165.76	2766.3
ENSG00000107201.9_DDX58	5555.2	4.09499	0.151745	26.986	2.16034e-160	1.24247e-157	467.177	509.962	10721.2	8919.58	7158.09
ENSG00000134321.11_RSAD2	5757.01	9.03163	0.337421	26.7667	7.90091e-158	4.40631e-155	2.43321	5.67886	11708	9360.55	7708.38
ENSG00000185507.19_IRF7	1234.28	3.27876	0.122601	26.7434	1.47514e-157	7.98486e-155	187.358	196.489	1839.48	1932.38	2015.67
ENSG00000172183.14_ISG20	1088.46	5.21856	0.195883	26.6412	2.26153e-156	1.18918e-153	41.3646	40.8878	2017.6	1690.72	1651.73
ENSG00000118503.14_TNFAIP3	2939.02	2.75522	0.103589	26.5977	7.21673e-156	3.68935e-153	588.838	706.451	4621.07	4495.42	4283.31
ENSG00000168394.10_TAP1	4987.04	2.76159	0.104826	26.3445	5.92736e-153	2.9483e-150	991.535	1197.1	8091.52	7414.69	7240.33
ENSG00000197632.8_SERPINB2	4666.94	3.08932	0.117419	26.3103	1.46054e-152	7.07362e-150	938.004	712.13	7594.3	7179.76	6910.51
ENSG00000136826.14_KLF4	1343.22	6.48155	0.246937	26.2477	7.5845e-152	3.5791e-149	10.9495	23.8512	1925.59	2230.86	2524.84
ENSG00000145147.19_SLIT2	1529.1	3.01897	0.117169	25.7658	2.14233e-146	9.85686e-144	266.437	298.708	2209.23	2488.89	2382.24
ENSG00000156804.7_FBXO32	7191.87	-2.5518	0.100374	-25.423	1.406e-142	6.31123e-140	13683.2	15053.5	2579.83	2488.89	2153.9
ENSG00000164107.8_HAND2	1396.45	-2.62107	0.103174	-25.4044	2.25418e-142	9.87759e-140	2754.4	2880.32	477.809	451.563	418.182
ENSG00000108771.12_DHX58	885.312	5.06674	0.200751	25.2389	1.49842e-140	6.41325e-138	27.982	45.4309	1345.63	1433.64	1573.87
ENSG00000089127.12_OAS1	2357	8.65021	0.346275	24.9807	9.90054e-138	4.14113e-135	0	2.27155	4809.33	3867.66	3105.75
ENSG00000101347.8_SAMHD1	7225.73	2.98827	0.119685	24.9677	1.37314e-137	5.61585e-135	1335.83	1387.91	12559.8	11345.9	9499.22
ENSG00000135111.14_TBX3	1724.52	2.79841	0.112223	24.9362	3.01591e-137	1.20663e-134	357.683	379.348	2429.57	2675.68	2780.3
ENSG00000170961.6_HAS2	861.931	4.42608	0.178021	24.8626	1.88925e-136	7.39784e-134	41.3646	74.961	1397.97	1428.83	1366.53
ENSG00000104722.13_NEFM	776.756	5.33772	0.215621	24.755	2.73612e-135	1.04907e-132	26.7654	24.987	1219.85	1291.14	1321.04
ENSG00000135114.12_OASL	1744.98	8.41351	0.341846	24.612	9.3935e-134	3.52812e-131	0	2.27155	2981.66	2960.68	2780.3
ENSG00000138166.5_DUSP5	1459.81	2.66736	0.109095	24.4499	5.04755e-132	1.8579e-129	323.618	355.497	2141.7	2172.13	2306.13
ENSG00000173193.13_PARP14	10449.4	3.15781	0.129539	24.3773	2.98006e-131	1.07539e-128	1643.64	1863.8	18697.9	16421.9	13619.8
ENSG00000073756.11_PTGS2	757.513	5.41357	0.222472	24.3337	8.62218e-131	3.05159e-128	20.6823	26.1228	1206.34	1311.36	1223.05
ENSG00000088826.17_SMOX	1594.27	3.5057	0.144757	24.2179	1.44164e-129	5.00601e-127	183.708	236.241	2250.6	2489.86	2810.92
ENSG00000120217.13_CD274	1901.08	3.19258	0.132232	24.1437	8.69038e-129	2.96181e-126	338.217	285.079	3276.29	2975.12	2630.7
ENSG00000165949.12_IFI27	1051.38	6.81745	0.283547	24.0435	9.76195e-128	3.26653e-125	10.9495	6.81464	1939.94	1600.21	1698.98
ENSG00000112149.9_CD83	746.836	4.19228	0.175887	23.835	1.44936e-125	4.76321e-123	54.7473	64.7391	1146.4	1162.13	1306.16
ENSG00000111335.12_OAS2	4162.76	8.73484	0.371334	23.5229	2.38038e-122	7.68569e-120	0	2.27155	8522.9	7042.08	5246.53
ENSG00000139289.13_PHLDA1	4382.45	1.94799	0.0828965	23.4991	4.16502e-122	1.32161e-119	1552.39	1650.28	6477.44	6222.72	6009.4
ENSG00000170345.9_FOS	1056	4.69745	0.202202	23.2315	2.18934e-119	6.82925e-117	38.9314	74.961	1487.46	1722.49	1956.18
ENSG00000205413.7_SAMD9	1897.43	4.61007	0.199895	23.0625	1.10174e-117	3.37939e-115	120.444	99.948	3904.36	3039.63	2322.75
ENSG00000105939.12_ZC3HAV1	7402.5	1.92473	0.0840387	22.9029	4.34422e-116	1.31067e-113	2865.11	2620.23	10757.5	10807.7	9962.02
ENSG00000140105.17_WARS	8467.15	1.89014	0.082769	22.8364	1.99589e-115	5.92456e-113	3169.26	3235.82	12748.9	11842.7	11339
ENSG00000069431.10_ABCC9	699.643	5.05586	0.221867	22.7878	6.05933e-115	1.77009e-112	31.6318	24.987	1057.77	1089.91	1293.92
ENSG00000152778.8_IFIT5	2311.5	2.57419	0.113286	22.723	2.65391e-114	7.63165e-112	573.022	566.751	3765.91	3546.07	3105.75
ENSG00000059728.10_MXD1	1583.86	2.22157	0.0982499	22.6114	3.34425e-113	9.46885e-111	491.509	486.111	2243.85	2373.36	2324.5
ENSG00000178607.15_ERN1	1459.84	2.40993	0.107128	22.4957	4.57194e-112	1.27488e-109	418.513	381.62	2084.3	2262.63	2152.15
ENSG00000175928.5_LRRN1	6969.15	-2.54619	0.114037	-22.3278	1.98675e-110	5.45733e-108	12808.4	15045.6	2496.26	2456.16	2039.3
ENSG00000056558.10_TRAF1	816.613	2.99965	0.134742	22.2622	8.58525e-110	2.32357e-107	152.076	151.058	1197.06	1295.96	1286.92
ENSG00000171227.6_TMEM37	752.406	-2.82048	0.126769	-22.2489	1.15566e-109	3.08242e-107	1579.16	1540.11	193.319	236.854	212.591
ENSG00000240065.7_PSMB9	752.858	3.58021	0.160943	22.2452	1.25598e-109	3.30214e-107	82.7293	103.355	1295.83	1157.31	1125.07
ENSG00000198805.11_PNP	3330.17	1.91078	0.0859465	22.2322	1.67588e-109	4.34408e-107	1264.05	1223.23	4569.58	4637.91	4956.07
ENSG00000171368.11_TPPP	994.941	-2.6082	0.11817	-22.0717	5.91657e-108	1.51234e-105	1858.98	2153.43	320.791	309.066	332.446
ENSG00000105559.11_PLEKHA4	1671.78	3.37556	0.153207	22.0327	1.3991e-107	3.52727e-105	194.657	282.807	2441.39	2491.78	2948.27
ENSG00000114757.18_PEX5L	591.546	3.9633	0.180472	21.9608	6.82873e-107	1.69832e-104	59.6138	51.1098	980.1	976.301	890.606
ENSG00000181381.13_DDX60L	5282.42	3.48215	0.158586	21.9574	7.35669e-107	1.80523e-104	793.228	608.774	10034	8171.47	6804.65
ENSG00000142089.15_IFITM3	14839.3	2.06011	0.0940587	21.9023	2.46848e-106	5.97763e-104	4725.3	5390.38	22965.2	20938.5	20176.9
ENSG00000163644.14_PPM1K	1419.28	2.5641	0.117593	21.8049	2.08631e-105	4.98654e-103	366.199	337.325	2317.29	2035.41	2040.17
ENSG00000151014.5_CCRN4L	1892.03	2.48953	0.114572	21.729	1.09176e-104	2.57598e-102	496.376	487.247	2546.91	2871.13	3058.51
ENSG00000171604.11_CXXC5	3633.67	-1.8923	0.0873802	-21.6559	5.34299e-104	1.24471e-101	6151.17	6824.86	1749.15	1778.33	1664.86
ENSG00000087074.7_PPP1R15A	8328.97	2.88237	0.133508	21.5895	2.25253e-103	5.18195e-101	1694.73	1645.73	10997.2	11934.2	15373
ENSG00000163661.3_PTX3	2871.6	3.16913	0.147481	21.4883	2.00218e-102	4.54914e-100	548.69	398.656	5130.96	4261.45	4018.23
ENSG00000079335.17_CDC14A	825.265	2.91886	0.135936	21.4724	2.82249e-102	6.33477e-100	150.859	171.502	1270.5	1329.66	1203.81
ENSG00000188313.12_PLSCR1	2870.05	3.21805	0.150026	21.4499	4.57664e-102	1.0148e-99	400.264	513.369	5266.88	4331.74	3838
ENSG00000133106.14_EPSTI1	717.899	5.3187	0.25007	21.2688	2.20841e-100	4.83852e-98	20.6823	23.8512	1423.3	1150.57	971.093
ENSG00000164161.9_HHIP	1848.85	2.71012	0.128182	21.1428	3.21726e-99	6.96593e-97	351.599	478.16	2889.65	2845.14	2679.69
ENSG00000178685.13_PARP10	753.199	3.43644	0.163342	21.0383	2.92837e-98	6.26671e-96	90.0289	114.713	1102.51	1143.83	1314.91
ENSG00000002549.12_LAP3	4946.62	2.09196	0.099656	20.9918	7.79833e-98	1.64966e-95	1650.94	1652.55	7873.72	6980.46	6575.44
ENSG00000115419.12_GLS	12795.4	-1.76204	0.0843828	-20.8816	7.87854e-97	1.64769e-94	20695.7	23779.7	6564.39	6536.6	6400.47
ENSG00000168389.17_MFSD2A	804.149	2.8755	0.137875	20.8558	1.3497e-96	2.79099e-94	163.025	160.144	1148.94	1237.23	1311.41
ENSG00000111981.4_ULBP1	523.841	3.66326	0.176042	20.8091	3.58146e-96	7.32368e-94	54.7473	65.8748	842.498	842.469	813.619
ENSG00000115415.18_STAT1	17371.3	2.52246	0.122487	20.5937	3.12847e-94	6.32708e-92	4384.65	4434.06	30006.6	26169.5	21861.8
ENSG00000174136.11_RGMB	5423.86	2.14346	0.104651	20.4819	3.1194e-93	6.24015e-91	1941.71	1565.09	8072.95	8008.75	7530.78
ENSG00000077522.12_ACTN2	615.821	6.64994	0.325812	20.4104	1.35208e-92	2.65161e-90	3.64982	4.54309	1056.92	1015.78	998.214
ENSG00000163734.4_CXCL3	686.956	7.03385	0.344622	20.4103	1.35433e-92	2.65161e-90	1.21661	3.40732	1153.16	1069.7	1207.3
ENSG00000128335.13_APOL2	2454.34	2.14586	0.105609	20.3189	8.75812e-92	1.69668e-89	855.275	729.166	3773.51	3540.3	3373.45
ENSG00000124920.13_MYRF	13469.8	-1.82676	0.0900114	-20.2947	1.43162e-91	2.74454e-89	21909.9	25566.2	6787.26	6718.57	6367.22
ENSG00000079215.13_SLC1A3	764.528	3.01431	0.149033	20.2259	5.79564e-91	1.09962e-88	115.578	162.416	1175.11	1201.6	1167.94
ENSG00000117036.11_ETV3	2489.39	1.70422	0.0845947	20.1457	2.93358e-90	5.50915e-88	1029.25	1069.9	3419.8	3399.72	3528.3
ENSG00000185585.19_OLFML2A	743.792	-2.56986	0.13004	-19.7622	6.30408e-87	1.17192e-84	1521.98	1465.15	270.14	246.482	215.215
ENSG00000246430.6_LINC00968	785.258	-2.96689	0.150412	-19.7251	1.31386e-86	2.41802e-84	1594.97	1724.1	234.684	208.932	163.599
ENSG00000081041.8_CXCL2	537.085	6.47037	0.328246	19.712	1.70198e-86	3.10132e-84	4.86643	3.40732	910.032	870.391	896.73
ENSG00000175592.8_FOSL1	5723.39	1.60485	0.0818418	19.6092	1.28964e-85	2.32691e-83	2686.27	2428.28	8058.6	7736.27	7707.5
ENSG00000138496.16_PARP9	2915.18	2.77347	0.141674	19.5764	2.45868e-85	4.39317e-83	573.022	675.785	5201.87	4351.95	3773.27
ENSG00000059804.15_SLC2A3	1734.06	1.79287	0.0919615	19.4959	1.18945e-84	2.10487e-82	703.199	683.735	2378.07	2432.09	2473.23
ENSG00000130813.17_C19orf66	1544.6	2.36272	0.121286	19.4805	1.60647e-84	2.81576e-82	418.513	448.63	2540.16	2212.56	2103.16
ENSG00000130303.12_BST2	672.584	7.24833	0.372247	19.4718	1.90396e-84	3.30571e-82	0	1.13577	1299.2	1087.99	974.593
ENSG00000106785.14_TRIM14	2929.66	2.39482	0.124373	19.2551	1.27812e-82	2.19836e-80	822.427	788.226	4879.39	4435.72	3722.52
ENSG00000197329.11_PELI1	733.626	2.78392	0.144743	19.2335	1.93996e-82	3.30583e-80	135.043	176.045	1097.44	1089.91	1169.69
ENSG00000136244.11_IL6	894.368	3.30994	0.172109	19.2316	2.01146e-82	3.39623e-80	110.711	152.194	1619.99	1352.76	1236.18
ENSG00000204267.13_TAP2	2634.49	1.97394	0.102795	19.2027	3.51034e-82	5.87312e-80	981.802	906.347	4054.63	3752.12	3477.56
ENSG00000121039.9_RDH10	3496.69	-1.77123	0.0923093	-19.188	4.66039e-82	7.72701e-80	5924.88	6259.24	1860.59	1815.88	1622.86
ENSG00000165312.6_OTUD1	1187.12	2.33402	0.122236	19.0944	2.81069e-81	4.61856e-79	326.051	352.09	1665.58	1672.42	1919.44
ENSG00000134070.4_IRAK2	1450.44	1.92212	0.100745	19.0791	3.77005e-81	6.14017e-79	510.975	561.072	2025.2	2042.15	2112.78
ENSG00000125868.15_DSTN	46154.5	-1.29116	0.067798	-19.0442	7.34244e-81	1.18535e-78	69772.4	73523.1	29524.6	29514.3	28438.2
ENSG00000116741.7_RGS2	424.68	4.09047	0.216433	18.8995	1.15185e-79	1.84336e-77	26.7654	42.0236	640.737	738.484	675.391
ENSG00000134986.13_NREP	3216.99	-1.97089	0.104394	-18.8793	1.68944e-79	2.68038e-77	6117.1	5564.15	1587.07	1499.11	1317.54
ENSG00000174010.9_KLHL15	1237.36	2.13132	0.113866	18.7178	3.54689e-78	5.57922e-76	423.379	380.484	1778.7	1903.5	1700.73
ENSG00000049130.13_KITLG	2677.22	2.12001	0.113446	18.6873	6.27697e-78	9.78995e-76	983.019	768.918	3941.5	3955.27	3737.4
ENSG00000159251.6_ACTC1	399.139	-3.50332	0.188239	-18.611	2.61772e-77	4.04845e-75	766.463	1014.25	81.886	68.3604	64.7395
ENSG00000076356.6_PLXNA2	1116.52	1.97817	0.10641	18.59	3.87197e-77	5.93831e-75	388.098	408.878	1556.68	1606.95	1621.99
ENSG00000137124.6_ALDH1B1	2531.12	-1.79217	0.0970502	-18.4665	3.84464e-76	5.84766e-74	4148.63	4713.46	1332.13	1220.86	1240.55
ENSG00000178573.6_MAF	1368.95	-2.3261	0.126235	-18.4268	8.00366e-76	1.20737e-73	2323.72	2975.72	501.446	518.961	524.915
ENSG00000118515.11_SGK1	2512.66	1.61176	0.0879299	18.3301	4.75965e-75	7.12168e-73	1064.53	1168.71	3389.41	3499.86	3440.82
ENSG00000186340.14_THBS2	1067.29	-2.38316	0.130285	-18.2918	9.61418e-75	1.42693e-72	1901.56	2268.14	375.663	433.27	357.817
ENSG00000111110.11_PPM1H	1212.52	-2.47068	0.135269	-18.2648	1.57651e-74	2.32113e-72	2373.6	2429.42	465.146	450.601	343.819
ENSG00000167034.9_NKX3-1	741.236	2.44033	0.133781	18.2413	2.42734e-74	3.54545e-72	192.224	202.168	1179.33	1048.51	1083.95
ENSG00000113721.13_PDGFRB	2680.35	-1.49419	0.0823209	-18.1508	1.26434e-73	1.8322e-71	4252.04	4513.56	1516.16	1582.88	1537.13
ENSG00000253309.6_SERPINE3	946.76	-2.70209	0.148903	-18.1466	1.36499e-73	1.96259e-71	1712.98	2164.78	321.635	247.445	286.954
ENSG00000059378.12_PARP12	1871.36	2.75348	0.151827	18.1356	1.66785e-73	2.37946e-71	375.932	431.594	3383.5	2783.52	2382.24
ENSG00000138061.11_CYP1B1	1438.7	-1.77896	0.098098	-18.1345	1.70116e-73	2.40831e-71	2633.95	2389.67	732.753	734.633	702.511
ENSG00000171855.6_IFNB1	466.541	6.94592	0.387142	17.9415	5.59096e-72	7.85467e-70	0	0	723.467	751.001	858.236
ENSG00000172667.10_ZMAT3	4311.28	-1.31022	0.0730585	-17.9338	6.41784e-72	8.94803e-70	6648.76	6806.69	2697.17	2745.97	2657.82
ENSG00000023608.4_SNAPC1	1564.41	1.73165	0.0968296	17.8835	1.58509e-71	2.19338e-69	641.152	654.205	2088.52	2193.31	2244.89
ENSG00000163083.5_INHBB	618.881	-2.38992	0.133952	-17.8416	3.35671e-71	4.61021e-69	1114.41	1307.27	218.644	220.486	233.587
ENSG00000132109.9_TRIM21	1699.3	2.1386	0.120007	17.8207	4.88565e-71	6.66041e-69	601.004	496.333	2676.07	2409.94	2313.13
ENSG00000196730.12_DAPK1	1681.62	-1.57281	0.0885352	-17.7648	1.32375e-70	1.79134e-68	2839.56	2765.61	931.137	962.822	908.978
ENSG00000101384.11_JAG1	1092.43	2.08296	0.117526	17.7233	2.76964e-70	3.72061e-68	369.849	360.04	1460.44	1597.32	1674.48
ENSG00000213626.11_LBH	5268.38	-2.27488	0.128775	-17.6655	7.73322e-70	1.03132e-67	8496.79	11735.9	2009.16	2130.72	1969.31
ENSG00000128849.10_CGNL1	567.912	-2.41911	0.137035	-17.6532	9.60982e-70	1.27237e-67	1024.38	1208.46	202.605	200.267	203.842
ENSG00000140022.9_STON2	644.244	-2.57878	0.146163	-17.6432	1.14796e-69	1.50907e-67	1266.49	1327.72	224.553	230.114	172.347
ENSG00000139318.7_DUSP6	1477.27	2.32716	0.131917	17.6411	1.19055e-69	1.55396e-67	357.683	486.111	2294.5	2123.02	2125.03
ENSG00000205189.11_ZBTB10	1233.46	1.77215	0.100689	17.6003	2.45006e-69	3.17542e-67	508.542	488.382	1695.97	1727.3	1747.09
ENSG00000090339.8_ICAM1	3726.38	2.26441	0.128681	17.5971	2.59215e-69	3.33608e-67	928.271	1289.1	5742.15	5285.89	5386.5
ENSG00000167552.13_TUBA1A	24524.4	-1.37004	0.0779605	-17.5735	3.93058e-69	5.02349e-67	39637.1	38117.7	15249.4	15594.8	14023.1
ENSG00000185022.11_MAFF	1612.89	2.43374	0.13852	17.5696	4.21286e-69	5.34714e-67	390.531	469.074	2132.41	2327.14	2745.31
ENSG00000164236.11_ANKRD33B	862.343	2.78769	0.15891	17.5425	6.78588e-69	8.55392e-67	221.423	141.972	1320.31	1292.11	1335.91
ENSG00000185112.5_FAM43A	408.221	4.90199	0.279534	17.5363	7.56696e-69	9.47363e-67	13.3827	18.1724	640.737	551.697	817.118
ENSG00000167772.11_ANGPTL4	488.113	4.31375	0.246155	17.5245	9.31483e-69	1.15831e-66	21.8989	42.0236	686.323	719.228	971.093
ENSG00000092969.11_TGFB2	4303.29	-2.04627	0.116787	-17.5213	9.84703e-69	1.21627e-66	7804.54	8060.58	2094.43	1960.31	1596.62
ENSG00000110446.9_SLC15A3	361.374	4.21454	0.241208	17.4726	2.31578e-68	2.84131e-66	19.4657	31.8016	640.737	596.95	517.916
ENSG00000111252.10_SH2B3	2179.31	1.68252	0.0968733	17.3683	1.43433e-67	1.74817e-65	965.986	891.582	3153.88	3044.44	2840.67
ENSG00000204264.8_PSMB8	1764.74	1.61394	0.0932283	17.3117	3.84161e-67	4.65138e-65	753.08	812.078	2366.25	2423.42	2468.85
ENSG00000074416.13_MGLL	4186.18	1.37175	0.0793578	17.2856	6.03901e-67	7.26418e-65	2085.26	2181.82	5417.14	5490.97	5755.69
ENSG00000071242.11_RPS6KA2	3303.7	-1.31597	0.0763754	-17.2303	1.57327e-66	1.88016e-64	5087.85	5240.46	2097.8	2066.22	2026.17
ENSG00000158258.15_CLSTN2	8409.43	-2.19611	0.127702	-17.1971	2.79029e-66	3.31307e-64	13911.9	17958.8	3575.97	3634.65	2965.77
ENSG00000133056.13_PIK3C2B	612.445	-2.20634	0.128605	-17.1559	5.68275e-66	6.70419e-64	1126.58	1199.38	263.386	225.3	247.585
ENSG00000070669.16_ASNS	1496.03	1.6209	0.0947097	17.1144	1.15922e-65	1.35888e-63	661.834	659.884	2104.56	2008.45	2045.42
ENSG00000162231.13_NXF1	5426.48	1.22922	0.071889	17.0988	1.51376e-65	1.76325e-63	2994.07	2992.76	6939.21	7186.5	7019.87
ENSG00000185201.16_IFITM2	5249.98	1.74528	0.102626	17.0061	7.39624e-65	8.56104e-63	2102.3	2205.67	8090.68	7216.35	6634.93
ENSG00000171522.5_PTGER4	708.444	2.27722	0.13394	17.0018	7.96724e-65	9.16432e-63	192.224	224.883	1002.89	1032.15	1090.07
ENSG00000163565.18_IFI16	4124.34	2.33319	0.137299	16.9935	9.17821e-65	1.04917e-62	1200.79	1143.72	7213.57	5996.45	5067.18
ENSG00000150630.3_VEGFC	2908.89	1.89313	0.111605	16.9627	1.5494e-64	1.76019e-62	1091.3	1091.48	4579.71	4109.32	3672.66
ENSG00000175197.10_DDIT3	1108.8	2.51683	0.148495	16.9489	1.95979e-64	2.21276e-62	307.802	251.006	1517	1553.99	1914.19
ENSG00000072422.16_RHOBTB1	1177.8	-1.99368	0.117925	-16.9064	4.0356e-64	4.52873e-62	2036.6	2263.6	575.735	536.292	476.798
ENSG00000163840.9_DTX3L	5173.66	2.2802	0.135084	16.8799	6.32576e-64	7.05572e-62	1498.86	1543.52	8820.9	7797.89	6207.12
ENSG00000149289.10_ZC3H12C	2122.39	1.75684	0.104456	16.8189	1.77436e-63	1.96719e-61	865.008	864.323	3239.14	2870.17	2773.3
ENSG00000234127.8_TRIM26	3111.02	1.42747	0.0848942	16.8147	1.90591e-63	2.10038e-61	1501.29	1570.77	4180.41	3986.08	4316.55
ENSG00000118946.11_PCDH17	756.164	2.485	0.147839	16.8088	2.10325e-63	2.30406e-61	191.007	197.624	1273.88	1094.73	1023.58
ENSG00000198576.3_ARC	407.38	5.63908	0.335726	16.7967	2.58196e-63	2.81173e-61	9.73286	3.40732	513.265	637.388	873.109
ENSG00000153253.15_SCN3A	296.309	4.39912	0.262576	16.7537	5.32049e-63	5.7599e-61	10.9495	23.8512	471.9	510.296	464.55
ENSG00000172061.8_LRRC15	796.649	-1.98336	0.118556	-16.7294	8.00198e-63	8.61218e-61	1535.36	1367.47	352.87	379.352	348.194
ENSG00000150593.15_PDCD4	2089.15	-1.61922	0.0971597	-16.6655	2.33442e-62	2.49783e-60	3664.42	3378.92	1207.19	1132.28	1062.95
ENSG00000144057.15_ST6GAL2	1091.77	-1.6578	0.0997715	-16.616	5.34187e-62	5.68276e-60	1800.58	1912.64	585.021	590.21	570.408
ENSG00000025708.12_TYMP	317.289	3.82763	0.230633	16.5962	7.42715e-62	7.85571e-60	20.6823	39.752	491.316	523.775	510.917
ENSG00000116679.15_IVNS1ABP	8206.37	-1.69656	0.102306	-16.5833	9.20754e-62	9.68317e-60	12980	15178.5	4533.28	4425.13	3914.99
ENSG00000184602.5_SNN	757.524	-1.93722	0.117091	-16.5446	1.75195e-61	1.83199e-59	1292.04	1443.57	358.779	348.542	344.694
ENSG00000145819.15_ARHGAP26	538.85	2.35153	0.142226	16.5338	2.095e-61	2.17832e-59	156.942	145.379	815.484	784.7	791.747
ENSG00000165891.15_E2F7	2201.21	1.94505	0.117809	16.5101	3.10309e-61	3.20839e-59	872.307	726.895	3363.24	3199.46	2844.17
ENSG00000149451.17_ADAM33	718.984	-1.85111	0.112308	-16.4825	4.90268e-61	5.04073e-59	1304.2	1247.08	346.116	347.579	349.943
ENSG00000163132.6_MSX1	360.422	3.35678	0.20392	16.4612	6.96741e-61	7.12379e-59	41.3646	57.9244	520.863	574.805	607.152
ENSG00000163545.8_NUAK2	1785.52	1.71912	0.104464	16.4566	7.52181e-61	7.64599e-59	719.015	767.782	2305.47	2488.89	2646.45
ENSG00000168062.9_BATF2	367.525	6.19471	0.376435	16.4563	7.56124e-61	7.64599e-59	1.21661	2.27155	787.625	538.217	508.293
ENSG00000171587.14_DSCAM	497.292	2.58269	0.157128	16.4369	1.04192e-60	1.04784e-58	130.177	109.034	726	793.365	727.882
ENSG00000121060.14_TRIM25	5536.09	1.43302	0.0872318	16.4278	1.21016e-60	1.21042e-58	2699.65	2748.57	7903.27	7407.95	6921.01
ENSG00000099204.18_ABLIM1	2257.49	-1.79213	0.109391	-16.3829	2.53394e-60	2.52079e-58	3730.12	4180.78	1192.83	1178.49	1005.21
ENSG00000163376.11_KBTBD8	874.826	2.12703	0.129855	16.3801	2.65379e-60	2.62582e-58	289.553	277.129	1288.23	1365.28	1153.94
ENSG00000260032.1_LINC00657	10060.9	-1.17361	0.071931	-16.3157	7.63136e-60	7.51056e-58	15526.3	14737.8	6882.65	6555.85	6601.68
ENSG00000196116.7_TDRD7	1857.57	2.25394	0.138191	16.3103	8.33768e-60	8.16206e-58	575.455	533.813	3167.39	2681.46	2329.75
ENSG00000164283.12_ESM1	305.004	6.06393	0.371797	16.3098	8.40552e-60	8.18493e-58	3.64982	0	565.605	492.965	462.8
ENSG00000150347.14_ARID5B	5803.23	-1.60998	0.0987877	-16.2974	1.02954e-59	9.97243e-58	9769.36	9755.15	3364.08	3323.66	2803.92
ENSG00000153487.12_ING1	1245.99	1.78662	0.109882	16.2594	1.9175e-59	1.84762e-57	500.026	496.333	1662.2	1697.46	1873.95
ENSG00000135899.16_SP110	1622.02	2.47938	0.152991	16.206	4.57275e-59	4.38317e-57	427.029	407.742	2950.43	2227.01	2097.91
ENSG00000011422.11_PLAUR	5462.2	1.37087	0.084759	16.1737	7.73282e-59	7.37383e-57	2803.06	2764.47	7744.56	7089.26	6909.63
ENSG00000170385.9_SLC30A1	3400.1	1.29039	0.0799384	16.1423	1.28571e-58	1.21971e-56	1822.48	1802.47	4399.05	4620.58	4355.92
ENSG00000160888.6_IER2	3979.91	2.04313	0.126715	16.1238	1.7355e-58	1.63796e-56	1270.14	1445.84	5027.97	5528.52	6627.05
ENSG00000065911.11_MTHFD2	3586.89	1.35985	0.0846372	16.0668	4.35874e-58	4.09277e-56	1936.84	1742.28	4691.99	4733.23	4830.09
ENSG00000183696.13_UPP1	615.927	2.4087	0.150339	16.0218	8.99415e-58	8.40245e-56	152.076	179.452	876.265	867.503	1004.34
ENSG00000214402.6_LCNL1	154.882	-4.28294	0.267466	-16.013	1.0365e-57	9.63422e-56	396.614	333.917	10.9744	15.4052	17.4972
ENSG00000167693.16_NXN	3235.85	-1.39048	0.0868418	-16.0116	1.06005e-57	9.80356e-56	4922.39	5394.92	1870.72	1983.41	2007.8
ENSG00000158220.13_ESYT3	223.201	-3.21224	0.200697	-16.0054	1.17095e-57	1.07751e-55	481.776	490.654	43.8977	56.8065	42.8681
ENSG00000169248.12_CXCL11	288.82	6.37161	0.398216	16.0004	1.26966e-57	1.16253e-55	0	0	486.251	458.303	499.544
ENSG00000059758.7_CDK17	3570.52	1.58685	0.0995236	15.9445	3.11092e-57	2.83432e-55	1659.45	1554.87	5345.39	4713.01	4579.88
ENSG00000141574.7_SECTM1	325.198	3.17843	0.199527	15.9298	3.9348e-57	3.56729e-55	43.7979	57.9244	529.305	500.667	494.295
ENSG00000146122.16_DAAM2	2636.18	-1.50256	0.0944008	-15.9168	4.84321e-57	4.36934e-55	4233.79	4411.34	1541.48	1605.02	1389.28
ENSG00000007944.14_MYLIP	745.904	1.96783	0.123759	15.9005	6.28469e-57	5.64212e-55	264.004	269.178	1015.56	1108.21	1072.58
ENSG00000189060.5_H1F0	1937.27	2.22758	0.140814	15.8193	2.28924e-56	2.0452e-54	523.141	650.798	3290.64	2659.31	2562.46
ENSG00000178381.11_ZFAND2A	740.089	1.98501	0.125522	15.8141	2.48778e-56	2.21184e-54	276.17	247.598	1021.47	1058.14	1097.07
ENSG00000166592.11_RRAD	801.758	3.19655	0.202618	15.7763	4.53302e-56	4.01085e-54	99.7618	147.65	1024.84	1187.16	1549.37
ENSG00000243710.7_CFAP57	311.266	3.12785	0.198751	15.7375	8.36618e-56	7.36704e-54	53.5307	47.7025	494.693	495.853	464.55
ENSG00000144655.14_CSRNP1	1411.33	2.06567	0.131907	15.66	2.83836e-55	2.48748e-53	439.195	508.826	1827.66	1985.34	2295.63
ENSG00000125148.6_MT2A	27820.5	1.41411	0.0905365	15.6192	5.3883e-55	4.69983e-53	15037.3	12621.8	37250.5	37679.1	36514
ENSG00000184009.9_ACTG1	200039	-0.980645	0.0629157	-15.5866	8.97207e-55	7.78877e-53	280961	287939	141775	146131	143391
ENSG00000185215.8_TNFAIP2	429.584	2.54174	0.163232	15.5714	1.13954e-54	9.84606e-53	96.112	114.713	616.256	658.57	662.268
ENSG00000091986.15_CCDC80	31604.5	-1.34306	0.0862829	-15.5658	1.24335e-54	1.06928e-52	47085.1	52472.7	20376.1	19851.5	18237.3
ENSG00000126368.5_NR1D1	570.819	2.37454	0.152561	15.5645	1.26783e-54	1.08526e-52	136.26	177.181	888.084	803.956	848.613
ENSG00000265972.5_TXNIP	595.651	2.5004	0.161308	15.5008	3.42582e-54	2.91893e-52	131.394	169.23	987.698	820.324	869.609
ENSG00000136205.16_TNS3	8795.12	-1.33033	0.0859351	-15.4807	4.68435e-54	3.97284e-52	13672.2	13941.6	5761.57	5587.26	5012.94
ENSG00000138623.9_SEMA7A	3281.92	1.51575	0.0979255	15.4786	4.84e-54	4.08603e-52	1412.48	1663.91	4283.4	4446.31	4603.51
ENSG00000090520.10_DNAJB11	6033.47	1.22523	0.0792749	15.4555	6.92894e-54	5.82284e-52	3339.59	3326.68	7558.84	7676.58	8265.66
ENSG00000172508.10_CARNS1	680.728	-1.76627	0.114388	-15.4411	8.66209e-54	7.24623e-52	1159.43	1214.14	348.649	343.727	337.695
ENSG00000124216.3_SNAI1	335.873	3.25758	0.211839	15.3777	2.31171e-53	1.9251e-51	43.7979	54.5171	466.835	522.812	591.404
ENSG00000092068.18_SLC7A8	2531.27	-1.54533	0.100634	-15.3559	3.23258e-53	2.67984e-51	4115.78	4275.05	1559.21	1401.87	1304.41
ENSG00000163431.12_LMOD1	458.071	-2.75565	0.179579	-15.3451	3.81837e-53	3.15127e-51	781.062	1114.19	126.628	132.869	135.603
ENSG00000185352.8_HS6ST3	405.126	2.77002	0.180717	15.328	4.97266e-53	4.08558e-51	99.7618	70.4179	592.619	655.682	607.152
ENSG00000155918.7_RAET1L	243.945	6.16524	0.402629	15.3125	6.31294e-53	5.1637e-51	0	0	410.274	414.013	395.436
ENSG00000091592.15_NLRP1	1957.2	-1.46254	0.0956149	-15.2962	8.10847e-53	6.60302e-51	3271.46	3085.89	1070.43	1144.8	1213.43
ENSG00000131015.4_ULBP2	537.721	2.45604	0.160679	15.2854	9.56651e-53	7.75603e-51	141.126	138.564	737.819	767.369	903.729
ENSG00000070614.14_NDST1	9507.39	-1.14485	0.0749162	-15.2817	1.013e-52	8.17686e-51	13576.1	14796.8	6319.58	6479.79	6364.6
ENSG00000146674.14_IGFBP3	3228.92	1.22397	0.0803164	15.2393	1.93865e-52	1.55803e-50	1755.56	1813.83	4312.1	4185.39	4077.72
ENSG00000178031.15_ADAMTSL1	1265.65	1.54795	0.101886	15.193	3.93307e-52	3.14714e-50	605.87	558.8	1668.11	1747.52	1747.97
ENSG00000169252.5_ADRB2	552.298	2.34703	0.154525	15.1886	4.20526e-52	3.35038e-50	177.625	131.75	794.379	812.622	845.113
ENSG00000023445.13_BIRC3	2012.6	2.11365	0.139291	15.1743	5.2302e-52	4.149e-50	616.82	692.821	3373.37	2916.39	2463.6
ENSG00000140416.19_TPM1	43009.8	-1.34048	0.0886978	-15.1128	1.33275e-51	1.0527e-49	64211.3	71203.9	28143.5	26875.2	24615
ENSG00000172602.9_RND1	223.944	5.58152	0.370263	15.0744	2.38508e-51	1.87586e-49	1.21661	3.40732	352.026	394.757	368.315
ENSG00000185947.14_ZNF267	773.743	1.74114	0.115799	15.0359	4.26988e-51	3.34395e-49	321.184	313.473	1082.25	1078.36	1073.45
ENSG00000197256.10_KANK2	2080.87	-1.30074	0.08657	-15.0253	5.00996e-51	3.90692e-49	3282.41	3200.61	1328.75	1345.06	1247.55
ENSG00000100345.20_MYH9	152523	-1.01093	0.0673747	-15.0046	6.84874e-51	5.31832e-49	211922	225854	108005	109843	106990
ENSG00000108551.4_RASD1	221.372	5.66727	0.378825	14.9601	1.33779e-50	1.03449e-48	2.43321	1.13577	341.895	366.835	394.561
ENSG00000143126.7_CELSR2	1352.63	-1.45814	0.0974835	-14.9578	1.38517e-50	1.06664e-48	2091.35	2297.67	782.56	806.845	784.748
ENSG00000141384.11_TAF4B	341.908	2.64289	0.176731	14.9543	1.45991e-50	1.11951e-48	72.9964	82.9114	518.33	520.887	514.417
ENSG00000107864.14_CPEB3	317.493	2.79398	0.18695	14.9451	1.67738e-50	1.28093e-48	62.047	68.1464	477.809	474.671	504.793
ENSG00000138735.15_PDE5A	516.761	-2.02635	0.135666	-14.9363	1.91249e-50	1.45444e-48	969.636	932.47	250.723	216.635	214.34
ENSG00000129116.17_PALLD	10715.2	-1.35318	0.0907226	-14.9156	2.60922e-50	1.97614e-48	16768.5	17083.2	7112.27	6615.55	5996.28
ENSG00000159200.17_RCAN1	6244.3	-1.1668	0.0783473	-14.8927	3.67686e-50	2.77332e-48	8926.25	9826.71	4193.92	4158.43	4116.21
ENSG00000130775.15_THEMIS2	357.75	3.29257	0.221093	14.8922	3.70257e-50	2.78131e-48	62.047	39.752	655.932	521.849	509.168
ENSG00000122729.18_ACO1	5185.39	-1.23542	0.082966	-14.8906	3.79154e-50	2.83657e-48	7656.11	8216.18	3358.17	3508.52	3187.98
ENSG00000204592.8_HLA-E	8028.55	1.22564	0.0824863	14.8587	6.11042e-50	4.55288e-48	4226.49	4638.5	10930.5	10128.9	10218.3
ENSG00000105835.11_NAMPT	3860.21	1.32099	0.0889164	14.8566	6.30844e-50	4.68148e-48	2119.33	1924	5361.43	4949.87	4946.45
ENSG00000148411.7_NACC2	3658.56	-1.51796	0.102476	-14.8128	1.21178e-49	8.95648e-48	5573.28	6476.18	1923.9	2119.17	2200.27
ENSG00000169245.5_CXCL10	226.553	5.89229	0.398436	14.7885	1.73665e-49	1.27845e-47	0	1.13577	431.379	377.426	322.823
ENSG00000116005.11_PCYOX1	3452.79	-1.211	0.0819368	-14.7797	1.9793e-49	1.45128e-47	5314.14	5184.8	2333.33	2294.4	2137.28
ENSG00000204642.13_HLA-F	259.226	4.76659	0.322804	14.7662	2.41991e-49	1.7673e-47	6.08304	12.4935	535.214	397.645	344.694
ENSG00000168564.5_CDKN2AIP	1376.76	1.45178	0.098382	14.7565	2.79265e-49	2.03146e-47	674	664.427	1771.95	1868.84	1904.57
ENSG00000125378.15_BMP4	2246.97	-1.81215	0.122912	-14.7435	3.38675e-49	2.45392e-47	3780	4136.48	1197.9	1185.23	935.224
ENSG00000103966.9_EHD4	3337.78	1.4554	0.098726	14.7418	3.47459e-49	2.5077e-47	1608.35	1629.83	4898.81	4406.84	4145.08
ENSG00000172346.14_CSDC2	338.69	-2.99093	0.20305	-14.73	4.13656e-49	2.9738e-47	603.437	840.472	75.1326	99.1707	75.2378
ENSG00000276600.4_RAB7B	248.044	-3.24138	0.220336	-14.7111	5.47315e-49	3.91937e-47	469.61	617.86	60.7814	39.4757	52.4915
ENSG00000184226.14_PCDH9	691.876	2.1013	0.142902	14.7045	6.0315e-49	4.30247e-47	240.888	212.39	900.746	1077.4	1027.96
ENSG00000143320.8_CRABP2	531.604	-1.91093	0.130114	-14.6866	7.86004e-49	5.58518e-47	934.354	977.9	262.542	252.259	230.963
ENSG00000073910.19_FRY	620.463	-2.29062	0.156005	-14.6829	8.29209e-49	5.86952e-47	1079.13	1316.36	238.905	266.702	201.217
ENSG00000179388.8_EGR3	219.26	4.72048	0.321904	14.6642	1.09249e-48	7.70355e-47	3.64982	12.4935	363.844	313.88	402.435
ENSG00000075711.20_DLG1	15004.9	-1.59307	0.108639	-14.6639	1.09857e-48	7.7168e-47	25518.3	24807.6	9199.94	8366.92	7131.85
ENSG00000182393.2_IFNL1	211.194	5.97293	0.40749	14.6579	1.19991e-48	8.39664e-47	0	0	331.765	342.765	381.438
ENSG00000070808.15_CAMK2A	638.413	-1.94914	0.133021	-14.6528	1.29262e-48	9.01112e-47	1111.98	1202.78	326.7	281.144	269.456
ENSG00000227051.5_C14orf132	1620.24	-1.77903	0.121917	-14.5921	3.15388e-48	2.19034e-46	2507.43	3160.86	839.121	830.915	762.877
ENSG00000204256.12_BRD2	11887.9	1.07117	0.0734399	14.5857	3.46355e-48	2.39636e-46	6977.24	7296.2	14507.3	15081.6	15576.9
ENSG00000138135.6_CH25H	214.929	5.1142	0.350657	14.5846	3.51886e-48	2.42551e-46	4.86643	4.54309	314.881	332.174	418.182
ENSG00000123095.5_BHLHE41	1112.4	-1.55881	0.107141	-14.5492	5.91309e-48	4.06062e-46	1933.19	1767.26	606.126	660.496	594.904
ENSG00000183508.4_FAM46C	238.813	3.88574	0.267154	14.5449	6.28771e-48	4.30182e-46	15.8159	24.987	330.077	411.125	412.058
ENSG00000119280.16_C1orf198	3636.88	-1.23104	0.0847069	-14.5329	7.49715e-48	5.11028e-46	5393.22	5726.57	2243	2473.49	2348.12
ENSG00000135604.9_STX11	252.289	3.25525	0.224425	14.5048	1.1295e-47	7.67059e-46	42.5813	30.6659	377.351	410.162	400.685
ENSG00000204525.14_HLA-C	6003.59	1.82279	0.125843	14.4846	1.51611e-47	1.02583e-45	2006.19	2672.47	9114.68	8459.35	7765.25
ENSG00000104635.13_SLC39A14	4965.65	1.16615	0.0805168	14.4833	1.54601e-47	1.03842e-45	2812.8	2850.79	6061.26	6451.87	6651.55
ENSG00000143751.9_SDE2	1835.46	1.26985	0.087676	14.4834	1.54267e-47	1.03842e-45	987.885	989.258	2362.88	2453.27	2383.99
ENSG00000175745.11_NR2F1	987.162	1.8815	0.129978	14.4756	1.72883e-47	1.157e-45	339.433	402.064	1281.47	1402.83	1510.01
ENSG00000162512.15_SDC3	1917.35	-1.36737	0.0944774	-14.473	1.79454e-47	1.19662e-45	2917.42	3163.13	1116.01	1159.24	1230.93
ENSG00000251562.7_MALAT1	11465	-1.11632	0.0771761	-14.4646	2.0267e-47	1.34655e-45	16334.2	17610.2	7511.57	7774.79	8094.19
ENSG00000212724.3_KRTAP2-3	906.04	2.17641	0.150811	14.4313	3.28652e-47	2.17572e-45	276.17	288.486	1553.3	1218.93	1193.31
ENSG00000113070.7_HBEGF	2099.27	1.55673	0.107917	14.4252	3.59361e-47	2.37049e-45	1057.23	863.187	2941.14	2774.85	2859.91
ENSG00000116761.11_CTH	480.891	2.65987	0.184468	14.4192	3.92119e-47	2.57734e-45	103.412	112.442	612.879	738.484	837.24
ENSG00000198938.2_MT-CO3	125219	-0.903286	0.0629982	-14.3383	1.26114e-46	8.25978e-45	170723	177100	92926.3	92119.9	93228.4
ENSG00000134531.9_EMP1	1727.25	1.92284	0.134168	14.3316	1.38892e-46	9.06444e-45	726.315	539.492	2609.38	2500.45	2260.63
ENSG00000012171.17_SEMA3B	1659.91	-1.33322	0.0931642	-14.3104	1.8844e-46	1.22121e-44	2492.83	2724.72	1045.1	1036.96	999.963
ENSG00000197415.11_VEPH1	656.048	1.91111	0.133547	14.3104	1.88451e-46	1.22121e-44	265.22	219.204	931.981	952.231	911.603
ENSG00000086696.10_HSD17B2	360.358	-3.30589	0.231495	-14.2806	2.88989e-46	1.86616e-44	585.188	1005.16	61.6256	78.9514	70.8635
ENSG00000151623.14_NR3C2	608.795	1.99562	0.139764	14.2784	2.98262e-46	1.91931e-44	199.524	226.019	934.514	859.8	824.117
ENSG00000132470.13_ITGB4	4563.87	-2.04759	0.143522	-14.2668	3.52555e-46	2.26078e-44	7174.33	9700.64	2207.55	2043.11	1693.73
ENSG00000164125.15_FAM198B	1826.49	-4.02167	0.282157	-14.2533	4.27406e-46	2.73124e-44	3769.05	4753.21	265.074	186.787	158.349
ENSG00000149212.10_SESN3	2085.91	-1.60615	0.112735	-14.2472	4.66873e-46	2.97313e-44	3382.17	3636.74	1191.15	1225.67	993.839
ENSG00000144959.9_NCEH1	4739.41	1.17208	0.0822868	14.2439	4.8939e-46	3.10577e-44	2841.99	2546.4	6147.36	6117.77	6043.52
ENSG00000144218.18_AFF3	2479.51	-1.52896	0.107352	-14.2425	4.99031e-46	3.15607e-44	4198.51	3992.24	1440.18	1526.07	1240.55
ENSG00000170525.18_PFKFB3	2738.17	1.22822	0.0863263	14.2276	6.17589e-46	3.89251e-44	1466.01	1551.47	3403.76	3652.95	3616.67
ENSG00000104856.13_RELB	1188.02	2.20714	0.155571	14.1874	1.09698e-45	6.89035e-44	319.968	404.335	1525.44	1649.31	2041.05
ENSG00000187678.8_SPRY4	1415.96	1.71409	0.120991	14.1671	1.46467e-45	9.16863e-44	547.473	630.354	2098.65	2033.48	1769.84
ENSG00000164105.3_SAP30	1348.64	-1.68188	0.118799	-14.1573	1.68305e-45	1.04999e-43	2470.93	2148.88	702.363	644.128	776.874
ENSG00000131979.18_GCH1	612.729	2.11187	0.149192	14.1554	1.72967e-45	1.07544e-43	187.358	210.118	986.009	866.54	813.619
ENSG00000105281.12_SLC1A5	4148.43	1.64204	0.116345	14.1135	3.13779e-45	1.94437e-43	1787.2	1817.24	5063.43	5529.49	6544.82
ENSG00000183876.8_ARSI	4143.88	-1.40823	0.0998373	-14.1052	3.5257e-45	2.17742e-43	6111.02	7172.41	2341.77	2479.27	2614.95
ENSG00000176490.4_DIRAS1	902.353	-1.74538	0.1238	-14.0984	3.88369e-45	2.39048e-43	1461.15	1672.99	423.781	500.667	453.177
ENSG00000168404.12_MLKL	811.032	2.64187	0.187592	14.083	4.82886e-45	2.96235e-43	210.473	157.872	1513.63	1139.98	1033.21
ENSG00000124201.14_ZNFX1	6316.52	1.45288	0.103195	14.079	5.11476e-45	3.12731e-43	3043.95	3088.17	9438	8388.1	7624.39
ENSG00000057294.13_PKP2	2426.9	-1.22073	0.086785	-14.0662	6.12852e-45	3.73475e-43	3631.57	3769.63	1655.45	1571.33	1506.51
ENSG00000243244.5_STON1	451.553	-1.88184	0.133897	-14.0544	7.2393e-45	4.3971e-43	830.943	784.819	221.177	210.858	209.966
ENSG00000173402.11_DAG1	9467.44	-1.23186	0.0877457	-14.039	9.00172e-45	5.4496e-43	13976.4	14984.3	6423.41	6310.33	5642.84
ENSG00000143067.4_ZNF697	875.803	1.78398	0.127313	14.0125	1.30743e-44	7.88913e-43	311.451	386.163	1198.74	1204.49	1278.17
ENSG00000060982.14_BCAT1	12642.3	-1.18869	0.0849361	-13.9951	1.67009e-44	1.00446e-42	18486.3	19726.1	8743.23	8533.49	7722.38
ENSG00000145365.10_TIFA	630.117	1.96125	0.140236	13.9854	1.9153e-44	1.14818e-42	198.307	251.006	906.656	922.383	872.234
ENSG00000004468.12_CD38	488.114	2.87763	0.206335	13.9464	3.30909e-44	1.97729e-42	86.3791	99.948	899.058	766.406	588.78
ENSG00000126562.16_WNK4	231.775	3.20163	0.229685	13.9392	3.65949e-44	2.17959e-42	27.982	40.8878	365.533	355.281	369.19
ENSG00000243649.8_CFB	640.398	2.4892	0.178647	13.9336	3.95855e-44	2.3501e-42	128.96	193.081	1067.9	969.562	842.489
ENSG00000006652.13_IFRD1	2722.94	1.30479	0.0937532	13.9173	4.97577e-44	2.9445e-42	1483.04	1392.46	3340.44	3639.47	3759.27
ENSG00000110092.3_CCND1	41938.9	0.857837	0.0617509	13.8919	7.09366e-44	4.18435e-42	28057.4	28243.3	51096.9	51382	50915
ENSG00000126016.13_AMOT	1093.84	-1.60133	0.115806	-13.8276	1.73618e-43	1.02085e-41	1790.85	1886.52	619.632	640.277	531.914
ENSG00000003436.14_TFPI	867.91	2.15958	0.156276	13.819	1.95674e-43	1.14687e-41	319.968	226.019	1365.89	1282.48	1145.19
ENSG00000107331.16_ABCA2	2915.34	-1.15369	0.0835993	-13.8003	2.53849e-43	1.48312e-41	4179.05	4546.5	1913.77	1949.71	1987.68
ENSG00000154734.14_ADAMTS1	6216.58	1.72464	0.125071	13.7893	2.95427e-43	1.72058e-41	2977.04	2160.24	8361.66	8629.77	8954.18
ENSG00000184254.16_ALDH1A3	490.904	-2.01452	0.146203	-13.7789	3.41302e-43	1.98149e-41	856.492	948.37	243.97	207.97	197.718
ENSG00000148339.12_SLC25A25	1808.86	1.97446	0.143514	13.7579	4.5637e-43	2.64121e-41	667.917	612.182	2221.9	2461.94	3080.38
ENSG00000163297.16_ANTXR2	4205.94	1.17334	0.0853566	13.7464	5.35413e-43	3.08895e-41	2270.19	2505.51	5614.68	5402.39	5236.9
ENSG00000132613.14_MTSS1L	3128.33	-1.17627	0.0856394	-13.7351	6.25566e-43	3.59778e-41	4704.62	4719.14	1989.75	2020	2208.14
ENSG00000144802.11_NFKBIZ	1927.8	1.53151	0.111507	13.7347	6.29093e-43	3.6068e-41	816.343	969.95	2771.46	2643.91	2437.36
ENSG00000090020.10_SLC9A1	4591.47	1.04621	0.076175	13.7343	6.32624e-43	3.61578e-41	2790.9	2794	5596.95	5811.59	5963.91
ENSG00000104419.14_NDRG1	1119.1	1.3822	0.100694	13.7267	7.02771e-43	4.00427e-41	557.206	573.565	1487.46	1466.38	1510.88
ENSG00000054793.13_ATP9A	2076.62	-1.32088	0.0962593	-13.7221	7.48776e-43	4.25323e-41	3217.93	3290.33	1382.78	1297.88	1194.18
ENSG00000171345.13_KRT19	38202.1	-1.13339	0.0827205	-13.7014	9.9604e-43	5.64035e-41	52868.9	60817.2	25791.6	26098.3	25434.8
ENSG00000088367.20_EPB41L1	1882.46	-1.27074	0.0927536	-13.7002	1.01272e-42	5.71723e-41	3067.07	2754.25	1216.47	1179.46	1195.06
ENSG00000120256.9_LRP11	2784.25	-1.2562	0.0917373	-13.6934	1.1116e-42	6.25625e-41	4247.18	4328.43	1919.68	1752.34	1673.6
ENSG00000138434.16_SSFA2	14891.6	-1.35384	0.0991888	-13.6491	2.04276e-42	1.14619e-40	22903.8	24176.1	9919.19	9356.7	8102.07
ENSG00000101255.10_TRIB3	1100.96	2.06921	0.15163	13.6464	2.11962e-42	1.1857e-40	319.968	412.286	1400.5	1554.96	1817.08
ENSG00000128510.10_CPA4	14488.1	-1.31601	0.0964526	-13.6441	2.18799e-42	1.22024e-40	23873.5	21475.2	9542.68	9388.48	8160.68
ENSG00000105287.12_PRKD2	1905.98	1.30315	0.0956013	13.6311	2.61531e-42	1.45414e-40	951.387	1061.95	2447.3	2474.45	2594.83
ENSG00000125740.13_FOSB	486.721	3.17283	0.232817	13.628	2.72837e-42	1.51244e-40	42.5813	104.491	726	802.031	758.502
ENSG00000243335.8_KCTD7	558.362	-1.68389	0.12365	-13.6182	3.12168e-42	1.72527e-40	965.986	948.37	308.128	284.995	284.329
ENSG00000159399.9_HK2	2689.79	1.7134	0.125852	13.6144	3.29038e-42	1.81306e-40	1248.24	989.258	4155.93	3598.07	3457.44
ENSG00000123700.4_KCNJ2	701.978	1.7406	0.127934	13.6055	3.71593e-42	2.04072e-40	304.152	270.314	1017.24	991.707	926.475
ENSG00000184347.14_SLIT3	4619.2	-1.31968	0.0969977	-13.6053	3.72572e-42	2.04072e-40	6804.48	7667.6	2974.07	3006.89	2642.95
ENSG00000175832.12_ETV4	329.74	2.60977	0.191932	13.5974	4.15006e-42	2.2664e-40	60.8304	90.8618	477.809	507.407	511.792
ENSG00000100906.10_NFKBIA	2096.73	1.66213	0.122266	13.5944	4.3243e-42	2.35457e-40	794.445	1002.89	2725.03	2815.29	3145.99
ENSG00000092820.17_EZR	39547	-0.905924	0.0666568	-13.5909	4.53689e-42	2.46304e-40	53529.5	56424.1	28818.8	29321.8	29641.1
ENSG00000164099.3_PRSS12	1526.66	-1.56736	0.115378	-13.5846	4.9402e-42	2.6741e-40	2355.35	2737.21	913.409	853.06	774.25
ENSG00000138035.14_PNPT1	4044.94	1.96457	0.144717	13.5753	5.61455e-42	3.03021e-40	1545.09	1333.4	6839.59	5788.49	4718.11
ENSG00000150782.11_IL18	3574.4	-1.38564	0.102144	-13.5655	6.41259e-42	3.4508e-40	5758.2	5636.84	2317.29	2247.23	1912.44
ENSG00000077150.17_NFKB2	2420.12	1.49956	0.110861	13.5265	1.09155e-41	5.85679e-40	1063.31	1220.96	3016.28	3224.49	3575.55
ENSG00000162614.18_NEXN	4258.38	-1.33898	0.0990017	-13.5248	1.11655e-41	5.97352e-40	6743.65	6666.99	2710.68	2826.85	2343.75
ENSG00000100889.11_PCK2	523.412	2.11452	0.156531	13.5086	1.39072e-41	7.41877e-40	161.809	176.045	674.505	777.96	826.741
ENSG00000184371.13_CSF1	2206.04	1.41366	0.104704	13.5015	1.5321e-41	8.14934e-40	1021.95	1166.44	3168.23	2874.02	2799.55
ENSG00000183486.12_MX2	179.755	5.65576	0.418923	13.5007	1.5489e-41	8.21498e-40	0	0	373.974	295.586	229.213
ENSG00000075275.16_CELSR1	3405.32	-1.77962	0.132372	-13.4441	3.33345e-41	1.7629e-39	5085.42	6841.9	1803.18	1758.11	1538
ENSG00000102580.14_DNAJC3	4242.29	0.981232	0.0730973	13.4236	4.39562e-41	2.31796e-39	2665.59	2674.75	5214.54	5323.44	5333.14
ENSG00000172986.12_GXYLT2	383.269	-2.04827	0.152861	-13.3996	6.08083e-41	3.19748e-39	650.885	767.782	159.551	167.531	170.597
ENSG00000113140.10_SPARC	40499.7	-1.36756	0.102253	-13.3743	8.54457e-41	4.48018e-39	60516.5	68003.3	27112.7	24682.9	22182.9
ENSG00000125657.4_TNFSF9	330.478	3.50127	0.262494	13.3385	1.38247e-40	7.22813e-39	30.4152	45.4309	402.677	495.853	678.015
ENSG00000243566.6_UPK3B	1227.95	-1.9591	0.147028	-13.3247	1.66371e-40	8.67389e-39	1855.33	2611.14	530.149	580.582	562.534
ENSG00000204262.11_COL5A2	4770.3	-1.26031	0.0946658	-13.3133	1.93818e-40	1.00763e-38	7203.53	7507.46	3283.88	3086.81	2769.8
ENSG00000163874.8_ZC3H12A	945.969	1.58577	0.119239	13.299	2.34441e-40	1.2154e-38	388.098	459.988	1314.4	1241.08	1326.29
ENSG00000138759.17_FRAS1	1035.08	-1.81241	0.136332	-13.294	2.50661e-40	1.29583e-38	1625.39	2026.22	536.058	536.292	451.427
ENSG00000151651.15_ADAM8	775.787	-1.61396	0.121464	-13.2876	2.73306e-40	1.40894e-38	1226.34	1391.32	441.509	392.831	426.931
ENSG00000132530.16_XAF1	639.063	5.87733	0.443209	13.2608	3.90492e-40	2.00743e-38	0	0	1488.3	1036	671.017
ENSG00000173110.7_HSPA6	159.926	5.31424	0.400837	13.2579	4.06372e-40	2.08325e-38	0	2.27155	217.8	282.107	297.452
ENSG00000131737.5_KRT34	249.101	3.03396	0.228897	13.2547	4.23839e-40	2.16676e-38	47.4477	36.3447	395.079	337.95	428.681
ENSG00000164342.12_TLR3	522.348	3.02347	0.228209	13.2487	4.59076e-40	2.3404e-38	100.978	76.0968	1026.53	809.733	598.403
ENSG00000068976.13_PYGM	367.278	-2.081	0.157454	-13.2166	7.04056e-40	3.57941e-38	648.452	720.08	168.837	160.791	138.228
ENSG00000154447.14_SH3RF1	3305.49	1.05632	0.0800709	13.1923	9.72095e-40	4.92849e-38	2018.35	1979.65	4024.23	4230.64	4274.56
ENSG00000227036.6_LINC00511	241.971	3.09376	0.235264	13.1502	1.69779e-39	8.58408e-38	30.4152	46.5667	363	344.69	425.181
ENSG00000070756.13_PABPC1	54237.2	-0.943447	0.0717665	-13.1461	1.79255e-39	9.03837e-38	76471.1	76103.6	41414.9	39353.4	37842.9
ENSG00000131016.16_AKAP12	7995.25	0.973546	0.0740807	13.1417	1.89948e-39	9.55135e-38	5215.6	4889.5	10093.9	10085.6	9691.68
ENSG00000146232.14_NFKBIE	1214.49	2.064	0.157251	13.1255	2.35328e-39	1.1801e-37	358.899	449.766	1531.35	1650.28	2082.16
ENSG00000095752.6_IL11	1694.76	1.92109	0.146384	13.1236	2.411e-39	1.20576e-37	603.437	633.761	2091.05	2236.64	2908.9
ENSG00000130222.10_GADD45G	185.659	3.98059	0.303689	13.1074	2.98558e-39	1.48907e-37	12.1661	14.765	247.346	302.326	351.693
ENSG00000071967.11_CYBRD1	6314.74	-1.20628	0.0921557	-13.0896	3.77451e-39	1.87746e-37	9412.89	9774.46	4356	4290.33	3740.02
ENSG00000173641.17_HSPB7	1985.61	-1.70469	0.130298	-13.083	4.11783e-39	2.04271e-37	2918.64	3922.96	986.009	1071.62	1028.83
ENSG00000069020.18_MAST4	1324.43	1.47543	0.112916	13.0667	5.10547e-39	2.52583e-37	603.437	663.291	1851.3	1870.76	1633.36
ENSG00000163121.9_NEURL3	152.559	5.24589	0.402598	13.0301	8.25111e-39	4.07114e-37	2.43321	0	216.956	240.705	302.701
ENSG00000156675.15_RAB11FIP1	2461.43	-1.19052	0.0914236	-13.0221	9.1647e-39	4.50982e-37	3744.72	3701.48	1670.64	1691.68	1498.63
ENSG00000100911.13_PSME2	2741.55	1.32931	0.102127	13.0162	9.89485e-39	4.85613e-37	1429.51	1423.12	3941.5	3615.4	3298.22
ENSG00000049249.8_TNFRSF9	210.961	3.77439	0.290124	13.0096	1.07965e-38	5.27053e-37	9.73286	27.2585	288.712	338.913	390.187
ENSG00000116711.9_PLA2G4A	346.628	2.13049	0.163761	13.0097	1.07697e-38	5.27053e-37	113.144	107.898	503.135	500.667	508.293
ENSG00000124766.5_SOX4	3167.46	-1.62822	0.125521	-12.9716	1.77194e-38	8.62718e-37	4607.29	6117.27	1597.2	1727.3	1788.21
ENSG00000110315.6_RNF141	1651.49	-1.13754	0.0877075	-12.9698	1.8161e-38	8.81886e-37	2487.96	2433.96	1136.27	1118.8	1080.45
ENSG00000150687.11_PRSS23	16993.5	-1.08773	0.0840011	-12.949	2.38035e-38	1.15284e-36	26435.7	23485.5	12107.3	11771.5	11167.6
ENSG00000112655.15_PTK7	6427.37	-1.78737	0.138251	-12.9284	3.11184e-38	1.50316e-36	9215.8	13347.6	3366.61	3166.72	3040.13
ENSG00000182179.10_UBA7	559.689	2.35938	0.182787	12.9078	4.06925e-38	1.96049e-36	135.043	170.366	973.346	824.176	695.513
ENSG00000023171.14_GRAMD1B	776.787	1.55088	0.1202	12.9024	4.36093e-38	2.09552e-36	379.581	331.646	1061.14	1078.36	1033.21
ENSG00000169271.2_HSPB3	108.808	-3.66272	0.284414	-12.8781	5.97555e-38	2.86391e-36	233.589	264.635	17.7279	10.591	17.4972
ENSG00000104833.10_TUBB4A	1805.64	-1.24558	0.0967598	-12.873	6.39124e-38	3.05518e-36	2901.61	2646.35	1224.91	1110.13	1145.19
ENSG00000005513.9_SOX8	225.024	-2.52189	0.196108	-12.8597	7.59005e-38	3.61884e-36	433.112	471.346	60.7814	83.7655	76.1127
ENSG00000182670.13_TTC3	10672.5	-1.24335	0.0967835	-12.8467	8.97218e-38	4.26677e-36	16287.9	16478.9	7310.65	7192.28	6092.52
ENSG00000130939.18_UBE4B	4324.06	-1.01464	0.0789893	-12.8453	9.14248e-38	4.33655e-36	6348.26	6083.2	3188.49	3051.18	2949.15
ENSG00000185880.12_TRIM69	1286.2	1.77408	0.138114	12.845	9.17676e-38	4.34162e-36	461.094	566.751	2037.86	1739.82	1625.49
ENSG00000057657.14_PRDM1	192.229	3.35493	0.261205	12.8441	9.28819e-38	4.38307e-36	15.8159	32.9374	295.465	308.103	308.825
ENSG00000106976.18_DNM1	1029.68	-1.33958	0.104305	-12.843	9.416e-38	4.43202e-36	1552.39	1692.3	646.646	611.392	645.646
ENSG00000100209.9_HSCB	542.157	1.68768	0.13143	12.8409	9.67752e-38	4.5435e-36	227.506	229.426	738.663	755.815	759.377
ENSG00000171223.5_JUNB	2189.87	2.04412	0.159195	12.8404	9.74039e-38	4.56138e-36	647.235	827.978	2661.72	2986.67	3825.76
ENSG00000103449.11_SALL1	149.486	4.15114	0.323387	12.8364	1.02508e-37	4.78823e-36	7.29964	10.222	224.553	255.148	250.21
ENSG00000113742.12_CPEB4	3951.19	1.02558	0.0799788	12.8232	1.21644e-37	5.66771e-36	2356.57	2499.84	4854.91	5136.65	4907.96
ENSG00000128016.5_ZFP36	807.903	1.88719	0.147203	12.8203	1.26148e-37	5.86268e-36	309.018	293.029	1069.58	1039.85	1328.04
ENSG00000141582.14_CBX4	1482.78	1.75186	0.136759	12.8098	1.44546e-37	6.70081e-36	616.82	584.923	1762.66	2077.77	2371.74
ENSG00000163947.11_ARHGEF3	1048.52	-1.88942	0.147588	-12.802	1.59802e-37	7.38942e-36	1638.77	2123.9	552.098	493.928	433.93
ENSG00000164938.13_TP53INP1	1910.86	-1.39338	0.10893	-12.7915	1.82864e-37	8.43467e-36	2818.88	3288.06	1238.42	1119.76	1089.2
ENSG00000143333.6_RGS16	133.5	5.13452	0.402018	12.7719	2.3547e-37	1.0834e-35	2.43321	0	210.202	229.152	225.714
ENSG00000139192.11_TAPBPL	262.067	2.58435	0.202498	12.7623	2.66219e-37	1.22182e-35	55.9639	65.8748	380.728	376.463	431.305
ENSG00000137834.14_SMAD6	550.917	-1.6663	0.130798	-12.7395	3.56598e-37	1.63254e-35	946.52	935.877	267.607	287.884	316.699
ENSG00000145675.14_PIK3R1	1647.61	1.24896	0.0981355	12.7269	4.19022e-37	1.91357e-35	897.856	894.989	2205.86	2228.93	2010.43
ENSG00000147041.11_SYTL5	311.09	-2.00163	0.157288	-12.7259	4.24461e-37	1.93361e-35	543.823	598.552	137.602	132.869	142.602
ENSG00000175352.10_NRIP3	909.219	1.52104	0.119616	12.7161	4.81248e-37	2.18689e-35	458.661	388.434	1222.38	1195.82	1280.79
ENSG00000170989.8_S1PR1	409.758	2.03317	0.1599	12.7152	4.86594e-37	2.20573e-35	153.293	124.935	561.384	604.652	604.527
ENSG00000135931.17_ARMC9	1981.47	-1.2579	0.0990351	-12.7016	5.79592e-37	2.62084e-35	3226.44	2882.59	1342.26	1248.78	1207.3
ENSG00000164171.10_ITGA2	3321.6	1.65788	0.130823	12.6727	8.37853e-37	3.77937e-35	1271.35	1577.59	5207.78	4495.42	4055.84
ENSG00000128590.4_DNAJB9	1742.08	1.3963	0.110344	12.654	1.06334e-36	4.78475e-35	795.661	947.235	2179.69	2381.06	2406.74
ENSG00000107554.15_DNMBP	2602.31	1.242	0.0981541	12.6536	1.06854e-36	4.79645e-35	1496.43	1347.03	3628.31	3229.3	3310.47
ENSG00000197110.8_IFNL3	131.593	5.10278	0.403853	12.6352	1.34985e-36	6.04446e-35	0	2.27155	198.384	217.598	239.711
ENSG00000166710.17_B2M	29293	1.43997	0.114124	12.6176	1.68814e-36	7.5409e-35	13390	15198.9	44499.6	38861.4	34514.9
ENSG00000109062.9_SLC9A3R1	11080.4	-0.83816	0.0665226	-12.5996	2.1215e-36	9.45375e-35	14890.1	15270.5	8478.16	8286.05	8477.38
ENSG00000050438.16_SLC4A8	540.987	-1.58236	0.125619	-12.5965	2.2059e-36	9.80614e-35	925.838	887.039	313.193	293.661	285.204
ENSG00000117143.13_UAP1	7045.19	0.902943	0.0717305	12.588	2.45873e-36	1.09037e-34	4718	4519.24	8726.35	8470.91	8791.45
ENSG00000168477.17_TNXB	182.687	3.88878	0.308998	12.5851	2.54982e-36	1.12805e-34	9.73286	18.1724	232.995	305.215	347.319
ENSG00000130766.4_SESN2	1645.87	1.82313	0.144883	12.5834	2.60449e-36	1.14947e-34	626.553	648.526	1934.87	2282.85	2736.56
ENSG00000112715.20_VEGFA	3304.68	1.1039	0.0877787	12.5759	2.86461e-36	1.26125e-34	1893.04	2001.23	4464.06	4060.22	4104.84
ENSG00000132718.8_SYT11	4651.9	-0.909721	0.0723525	-12.5735	2.95498e-36	1.29793e-34	6489.38	6462.55	3499.99	3450.75	3356.83
ENSG00000005882.11_PDK2	739.388	-1.42263	0.113166	-12.5711	3.04373e-36	1.33373e-34	1219.04	1161.9	431.379	461.192	423.432
ENSG00000135540.11_NHSL1	1504.87	-1.35619	0.107898	-12.5692	3.12006e-36	1.36393e-34	2208.14	2555.49	977.567	892.536	890.606
ENSG00000144834.12_TAGLN3	188.18	3.49242	0.278004	12.5625	3.3944e-36	1.48034e-34	18.2491	23.8512	283.646	259.962	355.193
ENSG00000111907.20_TPD52L1	1243.43	-1.48952	0.118598	-12.5594	3.52983e-36	1.53577e-34	1839.51	2232.93	740.351	729.819	674.516
ENSG00000148926.9_ADM	1241.01	1.53046	0.121892	12.5558	3.69365e-36	1.60325e-34	628.986	520.184	1569.34	1687.83	1798.71
ENSG00000133639.4_BTG1	2937.68	1.35616	0.108027	12.5539	3.78184e-36	1.63767e-34	1390.58	1617.34	3765.91	3664.5	4250.06
ENSG00000110427.14_KIAA1549L	1353.2	1.41451	0.112794	12.5406	4.47669e-36	1.93401e-34	664.268	675.785	1935.72	1852.47	1637.74
ENSG00000138678.10_AGPAT9	482.548	1.87359	0.149448	12.5367	4.70197e-36	2.02658e-34	188.574	173.773	734.442	681.678	634.273
ENSG00000114796.15_KLHL24	1209.31	-1.38365	0.11037	-12.5365	4.7138e-36	2.02693e-34	1767.73	2087.55	720.091	733.67	737.506
ENSG00000167981.5_ZNF597	409.985	1.88379	0.150555	12.5123	6.39155e-36	2.74196e-34	158.159	147.65	568.981	576.73	598.403
ENSG00000166750.9_SLFN5	10153.1	1.53293	0.122836	12.4795	9.65395e-36	4.13189e-34	4598.78	4782.74	15972.8	13729.8	11681.1
ENSG00000151414.14_NEK7	6287.33	0.888105	0.0712526	12.4642	1.17087e-35	4.99969e-34	4069.55	4236.43	7823.92	7682.36	7624.39
ENSG00000161202.17_DVL3	4533.91	-1.0765	0.0865262	-12.4414	1.55823e-35	6.63837e-34	6204.7	7072.46	3116.73	3125.32	3150.37
ENSG00000203814.6_HIST2H2BF	486.928	1.82191	0.14647	12.4388	1.60896e-35	6.83866e-34	192.224	185.131	633.984	698.046	725.258
ENSG00000179222.17_MAGED1	12733.9	-0.85849	0.0690499	-12.4329	1.73241e-35	7.34639e-34	17246.6	17640.8	9850.81	9623.4	9307.62
ENSG00000172379.18_ARNT2	1491.09	-1.32702	0.106997	-12.4023	2.53787e-35	1.07372e-33	2226.39	2457.81	998.672	910.83	861.736
ENSG00000177606.6_JUN	8449.8	1.09861	0.0886041	12.3991	2.64179e-35	1.11512e-33	4960.11	5024.66	10066.9	10518.8	11678.5
ENSG00000123689.5_G0S2	162.922	4.02988	0.325084	12.3964	2.73225e-35	1.15067e-33	12.1661	9.08618	266.763	209.895	316.699
ENSG00000036672.15_USP2	622.895	-1.94025	0.156687	-12.3829	3.23255e-35	1.35826e-33	1008.57	1251.62	317.414	293.661	243.211
ENSG00000069424.14_KCNAB2	1119.61	-1.41632	0.11441	-12.3793	3.38131e-35	1.41753e-33	1663.1	1936.49	640.737	707.674	650.02
ENSG00000162618.12_ADGRL4	872.648	1.44513	0.116772	12.3756	3.54028e-35	1.4808e-33	435.545	413.421	1228.29	1187.16	1098.82
ENSG00000113328.18_CCNG1	4399.33	-0.946617	0.0765691	-12.3629	4.14814e-35	1.73112e-33	6001.52	6388.72	3263.62	3141.69	3201.11
ENSG00000185630.18_PBX1	951.975	-1.53705	0.124503	-12.3454	5.15683e-35	2.1472e-33	1584.02	1571.91	600.216	529.552	474.173
ENSG00000116514.16_RNF19B	1162.32	1.45849	0.118216	12.3375	5.68962e-35	2.3637e-33	620.47	502.012	1609.02	1548.22	1531.88
ENSG00000099337.4_KCNK6	1259.77	-1.23941	0.100605	-12.3196	7.10506e-35	2.94508e-33	1882.09	1983.06	859.381	771.22	803.12
ENSG00000137198.9_GMPR	1271.41	1.95623	0.158855	12.3146	7.56276e-35	3.12775e-33	429.462	474.753	2199.95	1744.63	1508.26
ENSG00000058668.14_ATP2B4	29047.5	-1.23118	0.0999846	-12.3137	7.64182e-35	3.15336e-33	48026.8	40882.1	19929.5	19176.5	17222.5
ENSG00000139364.10_TMEM132B	253.766	-2.26536	0.184067	-12.3072	8.28283e-35	3.41023e-33	450.145	529.27	85.2628	99.1707	104.983
ENSG00000006042.11_TMEM98	4510.36	-1.48421	0.120601	-12.3068	8.32809e-35	3.42121e-33	6384.75	8371.78	2656.65	2706.49	2432.11
ENSG00000139793.18_MBNL2	4114.86	-1.26881	0.103223	-12.292	9.99768e-35	4.09793e-33	6493.03	6233.12	2863.48	2659.31	2325.37
ENSG00000115009.11_CCL20	115.934	5.22915	0.425666	12.2846	1.09548e-34	4.48026e-33	0	0	188.253	185.825	205.592
ENSG00000152377.12_SPOCK1	6357.86	-1.16047	0.0945082	-12.279	1.17408e-34	4.7911e-33	9096.57	9981.17	4533.28	4291.3	3887
ENSG00000183709.7_IFNL2	116.723	5.22587	0.426148	12.263	1.43066e-34	5.82521e-33	0	0	197.54	175.234	210.841
ENSG00000211455.7_STK38L	3666.08	-1.95287	0.159327	-12.257	1.54148e-34	6.26255e-33	5250.88	8088.97	1782.92	1728.27	1479.39
ENSG00000137571.10_SLCO5A1	127.803	4.35659	0.356518	12.2198	2.43599e-34	9.87489e-33	6.08304	4.54309	189.098	221.449	217.84
ENSG00000148158.16_SNX30	1222.85	-1.30904	0.1072	-12.2112	2.71011e-34	1.0962e-32	1822.48	2000.1	717.558	816.473	757.628
ENSG00000143641.9_GALNT2	12075.2	-0.907719	0.0743816	-12.2035	2.97606e-34	1.20113e-32	16233.2	17368.2	8647	8922.47	9205.26
ENSG00000142867.12_BCL10	1398.35	1.16777	0.0957494	12.1962	3.25863e-34	1.31229e-32	799.311	791.634	1852.99	1812.99	1734.84
ENSG00000125845.6_BMP2	1068.57	1.3035	0.106934	12.1897	3.5273e-34	1.41739e-32	549.906	576.973	1383.62	1354.69	1477.64
ENSG00000204103.3_MAFB	115.389	5.19993	0.427155	12.1734	4.30773e-34	1.72722e-32	0	0	167.149	205.081	204.717
ENSG00000117226.11_GBP3	1631.16	1.82654	0.150048	12.173	4.32983e-34	1.73231e-32	644.802	614.453	2755.42	2235.67	1905.44
ENSG00000204388.6_HSPA1B	5982.71	1.19695	0.0984445	12.1586	5.16218e-34	2.06084e-32	3151.01	3545.88	7379.87	7393.51	8443.26
ENSG00000087116.13_ADAMTS2	301.25	-2.18449	0.180187	-12.1235	7.93352e-34	3.16036e-32	519.491	626.947	127.472	129.981	102.358
ENSG00000166482.11_MFAP4	301.356	-2.57719	0.212754	-12.1135	8.96009e-34	3.56159e-32	500.026	724.623	112.277	87.6168	82.2367
ENSG00000119138.4_KLF9	2217.1	-1.40913	0.116395	-12.1065	9.76023e-34	3.87128e-32	3181.43	3936.59	1421.61	1283.44	1262.42
ENSG00000144597.13_EAF1	1913.41	1.10043	0.0909728	12.0963	1.10493e-33	4.37316e-32	1150.91	1107.38	2427.03	2538	2343.75
ENSG00000172331.11_BPGM	941.993	1.37817	0.114138	12.0746	1.43884e-33	5.6825e-32	479.343	472.482	1272.19	1317.14	1168.81
ENSG00000128965.11_CHAC1	335.186	2.84922	0.236468	12.0491	1.96061e-33	7.72656e-32	55.9639	70.4179	411.119	481.411	657.019
ENSG00000177409.11_SAMD9L	2089.49	4.53223	0.376509	12.0375	2.25722e-33	8.87646e-32	98.5452	48.8382	4383.86	3298.63	2617.58
ENSG00000065534.18_MYLK	26323.6	-1.19877	0.0996149	-12.034	2.3533e-33	9.23457e-32	40305	39553.3	18259.7	18367.8	15132.4
ENSG00000004139.13_SARM1	1976.94	-1.27906	0.106331	-12.029	2.5009e-33	9.79287e-32	2778.73	3352.8	1251.93	1273.81	1227.43
ENSG00000054282.15_SDCCAG8	1331.62	1.14508	0.0952074	12.0272	2.55731e-33	9.9925e-32	776.195	757.56	1707.79	1745.6	1670.98
ENSG00000260804.3_PKI55	673.191	-1.49269	0.124163	-12.0221	2.72118e-33	1.06103e-31	1090.08	1117.6	408.586	401.497	348.194
ENSG00000118762.7_PKD2	4476.76	-1.05589	0.0880088	-11.9975	3.65995e-33	1.42405e-31	6305.68	6727.18	3285.57	3159.98	2905.41
ENSG00000187498.14_COL4A1	15046.8	-1.34322	0.112214	-11.9702	5.08817e-33	1.97558e-31	20658	26828.1	9651.58	8970.61	9125.65
ENSG00000126945.8_HNRNPH2	2410.29	-1.06511	0.0891225	-11.9511	6.40735e-33	2.48255e-31	3515.99	3520.9	1785.45	1618.5	1610.61
ENSG00000112137.16_PHACTR1	1709.36	-1.44961	0.121445	-11.9363	7.65706e-33	2.96051e-31	2784.81	2761.06	1098.29	1051.4	851.237
ENSG00000125695.12_RP11-51F16.8	60.4626	-5.33905	0.447357	-11.9347	7.80842e-33	3.01271e-31	191.007	111.306	0	0	0
ENSG00000182054.9_IDH2	2580.34	-1.13863	0.0954478	-11.9293	8.32515e-33	3.20536e-31	3657.12	4038.81	1850.46	1707.08	1648.23
ENSG00000123609.10_NMI	731.14	2.11188	0.177135	11.9224	9.0422e-33	3.47417e-31	231.155	237.377	1305.11	1008.07	873.984
ENSG00000153944.10_MSI2	2654.62	-1.11419	0.0936092	-11.9026	1.14749e-32	4.39968e-31	3949.11	3912.74	1911.24	1844.77	1655.23
ENSG00000078401.6_EDN1	729.115	1.69488	0.142444	11.8985	1.20428e-32	4.60782e-31	290.769	319.152	1133.74	995.558	906.354
ENSG00000148218.15_ALAD	1196.01	-1.16477	0.0979015	-11.8974	1.22101e-32	4.66214e-31	1772.6	1821.78	828.146	759.666	797.871
ENSG00000106780.8_MEGF9	1440.12	-1.43224	0.120439	-11.8918	1.30606e-32	4.97656e-31	2386.98	2264.73	906.656	910.83	731.382
ENSG00000051108.14_HERPUD1	3613.48	1.02131	0.0860407	11.8701	1.69225e-32	6.43475e-31	2197.19	2252.24	4346.71	4447.27	4823.97
ENSG00000180354.15_MTURN	601.927	-1.46504	0.123429	-11.8695	1.7053e-32	6.47099e-31	928.271	1032.42	361.312	344.69	342.945
ENSG00000152926.14_ZNF117	1452.14	-1.47302	0.124187	-11.8613	1.87961e-32	7.11775e-31	2417.4	2322.66	948.021	848.246	724.383
ENSG00000109320.11_NFKB1	2966.11	0.949863	0.0801298	11.854	2.05048e-32	7.74889e-31	1852.89	1939.9	3600.45	3745.38	3691.9
ENSG00000138356.13_AOX1	849.424	1.43538	0.121111	11.8517	2.10846e-32	7.95165e-31	451.361	379.348	1170.89	1108.21	1137.32
ENSG00000134294.13_SLC38A2	22041.8	-1.0464	0.0884071	-11.8362	2.53719e-32	9.54895e-31	30870.2	33122.5	16155.2	15974.2	14087
ENSG00000162745.10_OLFML2B	200.868	-2.42427	0.204856	-11.834	2.60409e-32	9.78076e-31	372.282	424.779	58.2488	79.9142	69.1138
ENSG00000107485.15_GATA3	106.799	4.84435	0.409897	11.8185	3.13357e-32	1.17455e-30	0	2.27155	171.37	171.382	188.969
ENSG00000253953.2_PCDHGB4	949.747	-1.4158	0.119865	-11.8116	3.40005e-32	1.27184e-30	1569.42	1485.59	593.463	599.838	500.419
ENSG00000109501.13_WFS1	3784.91	-1.08736	0.0921695	-11.7974	4.0261e-32	1.50297e-30	5263.04	5858.32	2448.14	2739.23	2615.83
ENSG00000165030.3_NFIL3	989.743	1.28892	0.109285	11.7941	4.1888e-32	1.56054e-30	557.206	495.197	1316.93	1305.59	1273.79
ENSG00000104951.15_IL4I1	187.002	2.97394	0.252334	11.7857	4.62435e-32	1.71933e-30	31.6318	31.8016	308.972	316.768	245.835
ENSG00000177283.5_FZD8	933.413	2.01161	0.170856	11.7737	5.33314e-32	1.97885e-30	349.166	289.622	1146.4	1236.26	1645.61
ENSG00000100226.15_GTPBP1	2449.07	0.999008	0.0848623	11.7721	5.43508e-32	2.01262e-30	1474.53	1576.45	3002.77	3133.99	3057.63
ENSG00000145012.12_LPP	5755.28	-1.1363	0.0966038	-11.7625	6.09275e-32	2.25163e-30	8646.43	8508.07	3987.93	4165.17	3468.81
ENSG00000186832.8_KRT16	165.398	-2.57709	0.219611	-11.7348	8.45218e-32	3.11731e-30	296.852	375.941	52.3395	51.9924	49.8669
ENSG00000121966.6_CXCR4	215.308	2.62228	0.223482	11.7337	8.55813e-32	3.15008e-30	37.7148	57.9244	326.7	313.88	340.32
ENSG00000120594.16_PLXDC2	1915.01	-1.97885	0.168675	-11.7317	8.76725e-32	3.22061e-30	2754.4	4256.88	888.928	932.974	741.88
ENSG00000175220.11_ARHGAP1	4340.29	-0.896877	0.0765454	-11.7169	1.04399e-31	3.82742e-30	6011.26	6027.55	3356.48	3171.54	3134.62
ENSG00000144136.10_SLC20A1	8666.2	0.81841	0.0698514	11.7164	1.05004e-31	3.84194e-30	5957.73	5906.02	10688.2	10593.9	10185.1
ENSG00000109654.14_TRIM2	1194.94	-1.30249	0.111191	-11.714	1.08017e-31	3.94434e-30	1876.01	1855.85	807.042	672.05	763.752
ENSG00000162520.14_SYNC	1449.24	-1.22815	0.104851	-11.7132	1.09049e-31	3.97412e-30	2186.24	2246.56	918.474	1024.44	870.484
ENSG00000144893.12_MED12L	301.947	2.27888	0.194633	11.7086	1.15141e-31	4.18785e-30	77.8629	94.2691	496.381	445.787	395.436
ENSG00000043143.20_JADE2	1288.21	1.15418	0.0986367	11.7014	1.25442e-31	4.55351e-30	721.448	754.153	1695.97	1677.24	1592.24
ENSG00000176641.10_RNF152	973.996	1.27329	0.10886	11.6965	1.32778e-31	4.81032e-30	515.841	528.134	1275.56	1333.51	1216.93
ENSG00000117266.15_CDK18	3036.39	-1.18493	0.101323	-11.6946	1.35897e-31	4.91366e-30	4225.28	4951.97	2111.31	1994.97	1898.44
ENSG00000143786.7_CNIH3	511.397	1.57668	0.135054	11.6744	1.72217e-31	6.21467e-30	229.939	229.426	670.284	713.451	713.885
ENSG00000204389.9_HSPA1A	6767.16	0.997005	0.085477	11.664	1.94647e-31	7.01033e-30	4464.95	3976.34	8235.03	8331.3	8828.2
ENSG00000104312.7_RIPK2	2169.18	1.29713	0.111289	11.6555	2.15203e-31	7.73554e-30	1259.19	1035.82	2936.92	2949.12	2664.82
ENSG00000116774.11_OLFML3	695.636	-1.68068	0.144403	-11.6388	2.61679e-31	9.38779e-30	1093.73	1293.65	370.598	404.385	315.824
ENSG00000173546.7_CSPG4	6151.51	-1.08296	0.093057	-11.6376	2.65405e-31	9.50296e-30	8678.06	9376.94	4012.42	4071.77	4618.38
ENSG00000154639.18_CXADR	2504.78	-1.44101	0.123862	-11.634	2.76821e-31	9.89246e-30	3770.27	4340.92	1659.67	1473.12	1279.92
ENSG00000138134.11_STAMBPL1	565.583	1.6285	0.14001	11.6313	2.85649e-31	1.01881e-29	273.737	219.204	779.184	769.295	786.498
ENSG00000130066.16_SAT1	6381.33	1.01077	0.0869066	11.6305	2.88367e-31	1.02652e-29	4141.33	3760.54	8479.85	7686.21	7838.73
ENSG00000108175.16_ZMIZ1	4650.8	-0.865242	0.0744232	-11.626	3.04121e-31	1.08051e-29	6491.82	6279.69	3486.49	3588.44	3407.57
ENSG00000101265.15_RASSF2	865.337	-1.64555	0.141606	-11.6206	3.23916e-31	1.14862e-29	1313.94	1632.11	492.16	484.299	404.185
ENSG00000130702.13_LAMA5	5196.96	-1.51771	0.130662	-11.6155	3.43664e-31	1.21631e-29	7179.2	9977.76	2774	3004.97	3048.88
ENSG00000164463.12_CREBRF	1086.31	1.24838	0.107521	11.6106	3.64222e-31	1.28659e-29	597.354	583.787	1501.81	1396.09	1352.53
ENSG00000185760.15_KCNQ5	562.041	1.9605	0.16893	11.6054	3.86865e-31	1.36396e-29	198.307	198.76	932.825	804.919	675.391
ENSG00000181104.6_F2R	8237.91	-0.882182	0.0760623	-11.5981	4.211e-31	1.48182e-29	11393.5	11350.9	6425.94	6170.73	5848.43
ENSG00000272398.5_CD24	1722.16	-1.41019	0.121628	-11.5943	4.40239e-31	1.54621e-29	2458.76	3073.4	1024	1096.65	957.97
ENSG00000119771.14_KLHL29	2133.35	1.00763	0.086958	11.5875	4.76575e-31	1.66974e-29	1283.52	1361.79	2616.98	2657.39	2747.06
ENSG00000135919.12_SERPINE2	5535.76	0.855577	0.0738367	11.5874	4.77223e-31	1.66974e-29	3780	3654.92	6785.57	6898.62	6559.69
ENSG00000155287.10_SLC25A28	723.034	1.54306	0.133209	11.5837	4.98539e-31	1.74101e-29	357.683	305.523	1059.45	921.421	971.093
ENSG00000163162.8_RNF149	2048.41	0.982766	0.0848537	11.5819	5.09145e-31	1.77468e-29	1290.82	1283.42	2524.12	2522.59	2621.08
ENSG00000035403.16_VCL	23299.3	-1.03741	0.0895798	-11.5809	5.1519e-31	1.79236e-29	34198.8	33271.3	17456.9	16759.8	14809.6
ENSG00000125398.5_SOX9	3960.71	0.905134	0.0781592	11.5806	5.16575e-31	1.79378e-29	2522.03	2662.25	5010.24	4802.56	4806.47
ENSG00000165209.18_STRBP	919.42	-1.2346	0.106632	-11.5782	5.31778e-31	1.84309e-29	1369.9	1448.11	617.944	595.987	565.159
ENSG00000159784.17_FAM131B	1120.37	-1.82125	0.15748	-11.5649	6.20491e-31	2.14652e-29	1641.2	2328.33	496.381	530.515	605.402
ENSG00000153879.8_CEBPG	1551.06	1.32269	0.114418	11.5601	6.56136e-31	2.26558e-29	767.679	848.422	1863.96	2046.96	2228.26
ENSG00000085465.12_OVGP1	210.877	2.70116	0.233694	11.5585	6.68433e-31	2.30372e-29	49.8809	38.6163	368.909	300.4	296.577
ENSG00000137309.19_HMGA1	42486	1.17606	0.101773	11.5557	6.90897e-31	2.37225e-29	23467.1	24615.6	50292.4	52147.4	61907.6
ENSG00000223547.9_ZNF844	538.169	1.61129	0.139436	11.5558	6.90211e-31	2.37225e-29	233.589	239.648	695.609	725.005	796.996
ENSG00000136869.13_TLR4	187.762	2.6625	0.231154	11.5183	1.06722e-30	3.65756e-29	34.065	46.5667	287.023	276.33	294.827
ENSG00000179292.4_TMEM151A	1080.34	-1.80004	0.156348	-11.513	1.13422e-30	3.87997e-29	1636.34	2173.87	456.705	527.626	607.152
ENSG00000144583.4_MARCH4	2665.38	1.15259	0.100178	11.5054	1.23897e-30	4.23043e-29	1642.42	1414.04	3309.21	3341.95	3619.29
ENSG00000172548.14_NIPAL4	256.867	2.21998	0.193063	11.4987	1.33871e-30	4.56251e-29	66.9134	85.183	380.728	363.947	387.562
ENSG00000166669.13_ATF7IP2	643.425	1.82427	0.15871	11.4943	1.40862e-30	4.7919e-29	204.39	290.758	971.658	858.837	891.481
ENSG00000158966.13_CACHD1	1028.93	1.42391	0.1239	11.4923	1.44153e-30	4.8948e-29	458.661	551.986	1348.16	1477.93	1307.91
ENSG00000127603.23_MACF1	35270.5	-1.03094	0.0897511	-11.4866	1.53977e-30	5.21877e-29	49019.5	52922.5	25685.2	26123.3	22602
ENSG00000169826.7_CSGALNACT2	1588.27	1.14104	0.0994241	11.4765	1.73136e-30	5.85735e-29	952.603	880.224	2134.1	2039.26	1935.19
ENSG00000109846.7_CRYAB	3138.35	-0.977732	0.0853207	-11.4595	2.10738e-30	7.11637e-29	4289.76	4636.22	2345.15	2250.11	2170.52
ENSG00000134470.19_IL15RA	239.296	2.40364	0.209806	11.4565	2.18106e-30	7.35168e-29	66.9134	57.9244	394.235	357.207	320.198
ENSG00000160932.10_LY6E	3131.52	1.28292	0.112038	11.4508	2.33085e-30	7.84221e-29	1467.23	1869.48	4012.42	4250.86	4057.59
ENSG00000110330.8_BIRC2	3937.48	1.0574	0.0923477	11.4502	2.34641e-30	7.88018e-29	2355.35	2398.75	5364.8	4943.13	4625.38
ENSG00000169184.5_MN1	998.363	-1.27156	0.111219	-11.4329	2.8647e-30	9.60327e-29	1435.6	1655.96	637.36	618.132	644.771
ENSG00000102996.4_MMP15	3694.62	-1.36361	0.119386	-11.4218	3.25258e-30	1.08837e-28	5141.38	6586.35	2113.84	2212.56	2418.98
ENSG00000164484.11_TMEM200A	1472.47	1.25533	0.109978	11.4144	3.54534e-30	1.18418e-28	731.181	862.052	1943.32	2001.71	1824.08
ENSG00000079102.16_RUNX1T1	119.125	-2.88051	0.252405	-11.4123	3.63174e-30	1.21084e-28	231.155	274.857	26.1698	33.6988	29.7452
ENSG00000150938.9_CRIM1	36552.7	-0.941452	0.0825901	-11.3991	4.22499e-30	1.40609e-28	52378.6	50434	28069.2	27260.4	24621.1
ENSG00000103647.12_CORO2B	1655.05	1.07572	0.0944161	11.3934	4.51208e-30	1.49892e-28	974.502	1004.02	2097.8	2006.52	2192.4
ENSG00000175895.3_PLEKHF2	693.201	1.4813	0.130126	11.3836	5.04559e-30	1.67314e-28	296.852	361.176	934.514	961.859	911.603
ENSG00000137877.9_SPTBN5	161.462	2.8227	0.248001	11.3818	5.15345e-30	1.70583e-28	32.8484	28.3943	239.749	256.111	250.21
ENSG00000116584.17_ARHGEF2	2730.48	0.9425	0.082827	11.3791	5.31207e-30	1.75518e-28	1698.38	1805.88	3374.21	3312.11	3461.82
ENSG00000234571.1_RP5-998N21.4	157.131	2.9435	0.25868	11.3789	5.3273e-30	1.75706e-28	24.3321	29.5301	261.698	242.631	227.463
ENSG00000134590.13_FAM127A	3486.43	-0.897633	0.0788987	-11.377	5.4425e-30	1.79184e-28	4997.82	4675.98	2568.01	2554.37	2635.95
ENSG00000131242.15_RAB11FIP4	195.131	-2.61812	0.230199	-11.3733	5.68169e-30	1.86725e-28	339.433	459.988	62.4698	67.3975	46.3675
ENSG00000091409.14_ITGA6	5849.43	1.1018	0.0968789	11.3729	5.70488e-30	1.8682e-28	3634.01	3260.8	8012.17	7463.8	6876.39
ENSG00000165821.11_SALL2	1422.73	-1.50009	0.131899	-11.373	5.69913e-30	1.8682e-28	2090.13	2587.29	870.356	851.135	714.76
ENSG00000186918.13_ZNF395	1483.66	-1.18789	0.104469	-11.3707	5.85019e-30	1.91238e-28	2275.06	2214.76	1069.58	917.569	941.348
ENSG00000173848.18_NET1	2584.51	0.957178	0.0842216	11.365	6.24749e-30	2.03697e-28	1682.57	1609.39	3290.64	3244.71	3095.25
ENSG00000174749.5_C4orf32	319.458	1.92981	0.169804	11.3649	6.25347e-30	2.03697e-28	104.628	124.935	449.951	450.601	467.175
ENSG00000056998.18_GYG2	123.304	-2.82338	0.248582	-11.3579	6.77301e-30	2.20231e-28	238.455	281.672	34.6116	34.6616	27.1206
ENSG00000106484.14_MEST	5710.1	-1.15405	0.101726	-11.3446	7.88482e-30	2.5593e-28	8546.67	8564.86	4204.89	3838.77	3395.33
ENSG00000166147.13_FBN1	25429.2	-1.51089	0.133224	-11.3409	8.226e-30	2.66534e-28	37475.2	46362.2	15953.4	15382	11973.3
ENSG00000121691.4_CAT	1507.13	-1.14667	0.10118	-11.3329	9.01696e-30	2.91649e-28	2288.44	2219.3	1088.16	940.677	999.089
ENSG00000178695.5_KCTD12	303.242	1.97909	0.174706	11.3281	9.51944e-30	3.07361e-28	100.978	110.17	452.484	407.274	445.303
ENSG00000087903.12_RFX2	1759.14	-1.01023	0.0892304	-11.3216	1.02544e-29	3.30511e-28	2523.24	2529.37	1200.43	1305.59	1237.05
ENSG00000050628.20_PTGER3	104.828	4.42651	0.39138	11.31	1.17085e-29	3.7672e-28	4.86643	1.13577	174.746	196.416	146.976
ENSG00000087085.13_ACHE	157.239	3.28897	0.290942	11.3045	1.24606e-29	4.00217e-28	17.0325	22.7155	205.137	246.482	294.827
ENSG00000023839.10_ABCC2	126.576	3.42199	0.302846	11.2994	1.32071e-29	4.23455e-28	14.5993	13.6293	184.877	208.932	210.841
ENSG00000186567.12_CEACAM19	361.44	1.88604	0.166917	11.2992	1.32375e-29	4.23691e-28	122.877	144.243	479.498	510.296	550.286
ENSG00000198342.9_ZNF442	163.05	2.93309	0.259868	11.2869	1.52376e-29	4.86864e-28	25.5488	30.6659	227.086	249.371	282.579
ENSG00000172915.18_NBEA	1149.42	-1.70818	0.151447	-11.2791	1.66478e-29	5.30999e-28	1978.2	1994.42	649.179	663.384	461.925
ENSG00000139200.13_PIANP	725.68	-1.35011	0.119823	-11.2675	1.89891e-29	6.04629e-28	1153.34	1142.59	481.186	440.972	410.309
ENSG00000166016.5_ABTB2	739.103	1.53295	0.136084	11.2647	1.96068e-29	6.2322e-28	306.585	373.669	941.267	992.669	1081.33
ENSG00000151229.12_SLC2A13	406.075	1.75746	0.156142	11.2555	2.17496e-29	6.90137e-28	148.426	177.181	590.086	575.767	538.913
ENSG00000100918.12_REC8	5393.23	-0.895627	0.0796375	-11.2463	2.41545e-29	7.65127e-28	7248.55	7706.22	4135.67	4053.48	3822.26
ENSG00000162522.10_KIAA1522	2102.35	-1.27497	0.113419	-11.2413	2.55665e-29	8.08462e-28	2889.44	3627.66	1358.3	1325.81	1310.54
ENSG00000073008.14_PVR	6933.51	0.782925	0.0696743	11.2369	2.68542e-29	8.47726e-28	4927.26	4736.17	8300.04	8373.66	8330.4
ENSG00000109220.10_CHIC2	712.134	1.73289	0.154218	11.2366	2.6957e-29	8.49513e-28	268.87	311.202	855.16	1000.37	1125.07
ENSG00000167977.8_KCTD5	2062.18	1.1282	0.100409	11.2361	2.71009e-29	8.52591e-28	1175.24	1219.82	2454.89	2615.02	2845.92
ENSG00000180730.4_SHISA2	116.517	4.02065	0.357997	11.231	2.87337e-29	9.02414e-28	10.9495	2.27155	175.591	173.308	220.464
ENSG00000022267.16_FHL1	2655.05	-1.14978	0.102527	-11.2144	3.46442e-29	1.08619e-27	3674.15	4272.78	1875.78	1785.07	1667.48
ENSG00000270379.5_HEATR9	101.591	4.21245	0.376467	11.1894	4.59283e-29	1.43753e-27	7.29964	1.13577	173.902	164.643	160.974
ENSG00000187193.8_MT1X	1313.05	1.23779	0.110712	11.1803	5.09248e-29	1.59121e-27	768.896	666.699	1771.1	1752.34	1606.24
ENSG00000008441.16_NFIX	5292.99	-0.901893	0.0807055	-11.1751	5.39784e-29	1.6829e-27	6976.03	7730.07	3929.69	3859.95	3969.23
ENSG00000105855.9_ITGB8	1592.12	-1.0753	0.0962235	-11.175	5.40423e-29	1.6829e-27	2300.6	2362.41	1116.01	1155.39	1026.21
ENSG00000197976.10_AKAP17A	1179.19	1.45906	0.130631	11.1694	5.75947e-29	1.78748e-27	562.073	572.43	1402.19	1558.81	1800.46
ENSGR0000197976.10_AKAP17A	1179.19	1.45906	0.130631	11.1694	5.75947e-29	1.78748e-27	562.073	572.43	1402.19	1558.81	1800.46
ENSG00000186591.11_UBE2H	6508.02	-0.988806	0.0886002	-11.1603	6.3761e-29	1.97552e-27	8827.7	9747.2	4951.15	4600.36	4413.66
ENSG00000154736.5_ADAMTS5	1680.86	-1.34752	0.120834	-11.1519	7.01188e-29	2.16885e-27	2530.54	2783.78	1148.94	1040.81	900.23
ENSG00000154451.14_GBP5	102.788	4.68141	0.420274	11.139	8.1057e-29	2.50298e-27	0	2.27155	222.021	144.423	145.227
ENSG00000144485.10_HES6	193.799	2.63532	0.236937	11.1224	9.75656e-29	3.0077e-27	40.148	44.2951	266.763	279.218	338.57
ENSG00000243978.8_RGAG1	128.989	3.42843	0.308384	11.1174	1.03251e-28	3.17766e-27	15.8159	12.4935	221.177	220.486	174.972
ENSG00000123739.10_PLA2G12A	858.555	-1.2089	0.108804	-11.1108	1.11138e-28	3.41468e-27	1327.32	1286.83	584.177	526.664	567.783
ENSG00000120875.8_DUSP4	3145.62	0.900221	0.0810434	11.1079	1.14843e-28	3.52205e-27	1987.94	2138.66	3820.79	3856.1	3924.62
ENSG00000134243.11_SORT1	13696.8	-1.20591	0.108565	-11.1078	1.15016e-28	3.52205e-27	18751.6	22907.4	9270.01	9414.47	8140.56
ENSG00000099953.9_MMP11	353.16	-1.97927	0.178281	-11.102	1.22712e-28	3.75149e-27	545.04	749.61	155.33	162.717	153.1
ENSG00000112294.12_ALDH5A1	546.083	-1.35477	0.122141	-11.0918	1.37419e-28	4.19412e-27	873.524	856.373	321.635	335.062	343.819
ENSG00000136867.10_SLC31A2	443.057	1.95066	0.175996	11.0836	1.50756e-28	4.59358e-27	137.477	176.045	588.398	586.359	727.008
ENSG00000136235.15_GPNMB	9979.81	-1.13893	0.102772	-11.0821	1.53216e-28	4.6608e-27	14639.4	15142.1	7482.02	6654.06	5981.41
ENSG00000137821.11_LRRC49	750.253	1.25988	0.113699	11.0809	1.55375e-28	4.71868e-27	408.78	400.928	983.477	997.483	960.595
ENSG00000111885.6_MAN1A1	2036.99	-1.18441	0.106968	-11.0725	1.70496e-28	5.16936e-27	2810.36	3347.12	1337.19	1408.61	1281.67
ENSG00000125170.10_DOK4	1011.19	-1.14311	0.103361	-11.0594	1.97467e-28	5.97726e-27	1462.36	1558.28	651.712	703.823	679.765
ENSG00000171606.17_ZNF274	1129.18	1.1527	0.104268	11.0552	2.06918e-28	6.25307e-27	670.351	623.539	1404.73	1511.63	1435.64
ENSG00000126705.13_AHDC1	1483.59	-1.13394	0.102577	-11.0545	2.08509e-28	6.29082e-27	2090.13	2330.61	961.528	975.339	1060.33
ENSG00000153234.13_NR4A2	251.28	2.22979	0.201783	11.0505	2.18102e-28	6.56948e-27	85.1625	62.4675	345.272	370.686	392.812
ENSG00000144824.19_PHLDB2	3396.26	-1.4576	0.13205	-11.0383	2.49755e-28	7.51061e-27	4705.84	6345.56	2135.79	1980.52	1813.58
ENSG00000130518.16_KIAA1683	494.819	1.74803	0.158449	11.0321	2.67493e-28	8.03091e-27	167.892	230.562	663.53	709.6	702.511
ENSG00000130513.6_GDF15	522.748	1.95225	0.177224	11.0157	3.2096e-28	9.62043e-27	177.625	191.946	612.879	762.555	868.735
ENSG00000203880.11_PCMTD2	1159.24	-1.1203	0.101745	-11.0109	3.38574e-28	1.01319e-26	1715.42	1725.24	808.73	814.547	732.257
ENSG00000103994.16_ZNF106	7939.79	-0.991643	0.0900953	-11.0066	3.55161e-28	1.0611e-26	10973.8	11707.5	5591.89	6138.95	5286.77
ENSG00000164949.7_GEM	1717.22	1.38464	0.125841	11.0031	3.692e-28	1.10126e-26	968.419	757.56	2177.16	2201.01	2481.97
ENSG00000179454.13_KLHL28	734.519	1.35728	0.123384	11.0004	3.80465e-28	1.13302e-26	402.697	347.546	1010.49	951.268	960.595
ENSG00000253719.3_ATXN7L3B	2272.08	-1.03506	0.0942508	-10.982	4.66681e-28	1.38753e-26	3153.45	3423.22	1691.75	1582.88	1509.13
ENSG00000139971.15_C14orf37	550.496	-1.37171	0.124924	-10.9803	4.75209e-28	1.4106e-26	845.542	906.347	346.116	336.025	318.449
ENSG00000138193.14_PLCE1	1037.86	-1.26014	0.114834	-10.9736	5.11995e-28	1.51735e-26	1613.22	1591.22	655.088	727.893	601.903
ENSG00000155254.12_MARVELD1	2012.43	-1.13351	0.103321	-10.9708	5.27887e-28	1.56193e-26	2766.56	3229	1286.54	1404.76	1375.28
ENSG00000049239.12_H6PD	2517.48	-1.12388	0.102452	-10.9698	5.33776e-28	1.57683e-26	3427.18	4052.44	1705.26	1773.52	1628.99
ENSG00000172830.12_SSH3	1019.3	-1.15329	0.10541	-10.9409	7.34304e-28	2.16573e-26	1452.63	1601.44	674.505	704.786	663.143
ENSG00000107317.11_PTGDS	1034.75	-1.44737	0.132359	-10.9352	7.82572e-28	2.30439e-26	1497.64	1860.4	547.033	633.537	635.147
ENSG00000176971.3_FIBIN	494.21	-1.92864	0.176394	-10.9337	7.95637e-28	2.33912e-26	762.813	1031.28	260.853	216.635	199.468
ENSG00000185338.4_SOCS1	160.82	3.16353	0.289394	10.9316	8.14169e-28	2.38979e-26	30.4152	14.765	222.865	236.854	299.202
ENSG00000164305.17_CASP3	5792.47	0.980791	0.0897275	10.9308	8.21451e-28	2.40732e-26	3458.81	3824.15	7622.16	7268.34	6788.9
ENSG00000024422.11_EHD2	9520.17	-0.764433	0.0700332	-10.9153	9.74199e-28	2.85042e-26	13023.8	12285.7	7409.42	7495.57	7386.43
ENSG00000154642.10_C21orf91	1205.64	1.10655	0.101651	10.8857	1.34867e-27	3.93984e-26	701.982	714.401	1566.81	1585.77	1459.26
ENSG00000143367.15_TUFT1	3791.91	0.972856	0.089428	10.8786	1.45716e-27	4.25002e-26	2365.08	2422.6	4416.78	4715.9	5039.19
ENSG00000137843.11_PAK6	228.858	-2.0422	0.187834	-10.8724	1.56053e-27	4.5443e-26	400.264	449.766	84.4186	103.985	105.858
ENSG00000010379.15_SLC6A13	92.86	4.19541	0.386051	10.8675	1.64653e-27	4.78715e-26	1.21661	5.67886	157.863	156.94	142.602
ENSG00000123096.11_SSPN	639.789	-1.55547	0.143249	-10.8585	1.81675e-27	5.27374e-26	1042.63	1091.48	400.988	362.021	301.826
ENSG00000152439.12_ZNF773	484.082	1.5031	0.138475	10.8547	1.89526e-27	5.49297e-26	222.639	230.562	623.009	665.31	678.89
ENSG00000137474.19_MYO7A	209.939	-2.3598	0.21761	-10.8442	2.12577e-27	6.15137e-26	458.661	369.126	91.1721	61.6206	69.1138
ENSG00000067066.16_SP100	4967.37	1.54414	0.142398	10.8438	2.13342e-27	6.1638e-26	2367.52	2171.6	8045.94	6783.08	5468.74
ENSG00000105948.13_TTC26	572.581	1.44988	0.133904	10.8278	2.54328e-27	7.33643e-26	253.054	299.844	753.858	782.774	773.375
ENSG00000114115.9_RBP1	1720.43	-1.34086	0.123849	-10.8266	2.57641e-27	7.42039e-26	2373.6	3057.5	1021.47	1035.03	1114.57
ENSG00000157741.14_UBN2	1899.24	1.0719	0.0990502	10.8218	2.71435e-27	7.80545e-26	1203.22	1071.03	2396.64	2523.56	2301.75
ENSG00000115844.10_DLX2	171.11	3.11455	0.287816	10.8213	2.72857e-27	7.83411e-26	34.065	15.9008	217.8	285.958	301.826
ENSG00000263001.5_GTF2I	14420.4	-1.05931	0.0979073	-10.8195	2.78164e-27	7.97403e-26	21080.2	20967.5	11058	10011.4	8984.8
ENSG00000125826.19_RBCK1	3147.66	0.938948	0.0868207	10.8148	2.9294e-27	8.38456e-26	1970.9	2075.06	3808.97	3763.67	4119.71
ENSG00000218336.7_TENM3	3971.57	-0.910295	0.0842412	-10.8058	3.23073e-27	9.23266e-26	5247.23	5817.43	2932.7	3004.97	2855.54
ENSG00000119630.13_PGF	118.798	3.8601	0.35749	10.7978	3.52625e-27	1.00616e-25	12.1661	3.40732	155.33	187.75	235.337
ENSG00000276547.1_PCDHGB5	1348.55	-1.09361	0.101317	-10.7939	3.67873e-27	1.04804e-25	1891.82	2079.6	888.928	973.413	908.978
ENSG00000148606.12_POLR3A	3364.88	0.880825	0.081623	10.7914	3.78065e-27	1.07541e-25	2176.51	2281.77	4125.54	4264.34	3976.23
ENSG00000169991.10_IFFO2	1119.47	1.20352	0.111529	10.7912	3.79001e-27	1.07641e-25	598.571	647.391	1343.94	1509.7	1497.76
ENSG00000103723.12_AP3B2	102.339	3.74207	0.347364	10.7728	4.62917e-27	1.31272e-25	4.86643	10.222	155.33	163.68	177.596
ENSG00000099860.8_GADD45B	3028.53	1.31878	0.122606	10.7563	5.53466e-27	1.56708e-25	1571.86	1586.67	3396.16	4092.96	4495.02
ENSG00000149428.18_HYOU1	15240.4	0.858165	0.0798587	10.746	6.18634e-27	1.74622e-25	9900.75	10532	17671.3	18476.6	19621.3
ENSG00000167202.11_TBC1D2B	3791.29	-0.867454	0.0807224	-10.7461	6.17896e-27	1.74622e-25	4991.74	5428.99	2844.91	2900.02	2790.8
ENSG00000179532.12_DNHD1	645.703	1.5452	0.143839	10.7425	6.42533e-27	1.8109e-25	306.585	282.807	773.274	955.119	910.728
ENSG00000166900.14_STX3	2897.29	-0.875298	0.081551	-10.7331	7.11422e-27	2.00199e-25	3868.81	4114.91	2222.74	2166.35	2113.66
ENSG00000164794.8_KCNV1	90.8476	4.15799	0.387438	10.732	7.20165e-27	2.0235e-25	3.64982	3.40732	145.2	135.758	166.223
ENSG00000166963.12_MAP1A	7248.62	-0.876614	0.0817288	-10.7259	7.69468e-27	2.15873e-25	10593	9390.57	5420.52	5405.28	5433.75
ENSG00000092847.10_AGO1	1829.54	-0.968358	0.090528	-10.6968	1.05384e-26	2.95202e-25	2502.56	2687.24	1333.81	1354.69	1269.42
ENSG00000067798.13_NAV3	2214.65	1.39871	0.130766	10.6963	1.05897e-26	2.96189e-25	1007.35	1197.1	3213.82	3130.13	2524.84
ENSG00000106689.10_LHX2	2078.11	-0.980333	0.0917685	-10.6827	1.2268e-26	3.42609e-25	2890.66	3026.83	1587.07	1453.86	1432.14
ENSG00000116701.14_NCF2	93.0541	4.08296	0.382443	10.676	1.31839e-26	3.6757e-25	1.21661	6.81464	135.914	155.977	165.348
ENSG00000185189.15_NRBP2	1791.82	-1.00128	0.0937892	-10.6759	1.32017e-26	3.6757e-25	2636.39	2498.7	1343.94	1271.89	1208.18
ENSG00000028277.20_POU2F2	1376.9	1.25136	0.117256	10.672	1.37597e-26	3.82527e-25	708.065	783.683	1938.25	1835.14	1619.36
ENSG00000151304.5_SRFBP1	990.965	1.18446	0.11104	10.6669	1.45364e-26	4.03511e-25	563.289	551.986	1365.89	1220.86	1252.8
ENSG00000278996.1_CH507-513H4.1	138.051	2.80968	0.263422	10.6661	1.46664e-26	4.05896e-25	26.7654	24.987	221.177	210.858	206.467
ENSG00000280441.2_CH507-528H12.1	138.051	2.80968	0.263422	10.6661	1.46664e-26	4.05896e-25	26.7654	24.987	221.177	210.858	206.467
ENSG00000197748.12_CFAP43	95.0759	3.86724	0.362621	10.6647	1.48921e-26	4.11523e-25	4.86643	6.81464	143.512	153.089	167.098
ENSG00000165997.4_ARL5B	2857.06	0.937174	0.0878867	10.6634	1.50919e-26	4.1642e-25	1852.89	1822.92	3711.04	3564.37	3334.09
ENSG00000075213.10_SEMA3A	1538.01	1.55709	0.146147	10.6543	1.66556e-26	4.58876e-25	756.73	637.169	2441.39	2079.7	1775.09
ENSG00000156508.17_EEF1A1	299354	-0.653661	0.0613739	-10.6505	1.73485e-26	4.77251e-25	383724	383103	239862	244883	245199
ENSG00000170296.9_GABARAP	4576.81	-0.817655	0.0767815	-10.6491	1.76022e-26	4.83509e-25	6274.04	6107.05	3354.79	3587.47	3560.67
ENSG00000124098.9_FAM210B	1741.85	-1.08042	0.101504	-10.6441	1.85751e-26	5.09472e-25	2560.96	2550.95	1313.55	1153.46	1130.32
ENSG00000150764.13_DIXDC1	709.355	-1.31201	0.123281	-10.6425	1.89086e-26	5.17848e-25	1126.58	1096.02	473.588	452.526	398.061
ENSG00000122786.19_CALD1	42586.2	-1.15928	0.108978	-10.6377	1.98954e-26	5.44063e-25	57000.5	70866.5	29992.2	29025.2	26046.3
ENSG00000149639.14_SOGA1	3557.35	-0.907185	0.0852847	-10.6371	2.00185e-26	5.46619e-25	5029.45	4872.47	2667.63	2752.71	2464.48
ENSG00000120526.10_NUDCD1	1937.09	1.15259	0.108425	10.6303	2.15379e-26	5.87236e-25	1135.09	1083.53	2719.12	2487.93	2259.76
ENSG00000130508.10_PXDN	25302.7	-0.892112	0.083975	-10.6235	2.31598e-26	6.30523e-25	33500.5	36599.1	19927	18758.7	17728.1
ENSG00000148841.15_ITPRIP	2753.64	1.18995	0.112076	10.6173	2.47584e-26	6.73049e-25	1358.95	1728.65	3518.57	3499.86	3662.16
ENSG00000158321.15_AUTS2	1509.44	-1.04786	0.0987353	-10.6128	2.59835e-26	7.05311e-25	2170.43	2215.89	1077.18	1108.21	975.467
ENSG00000163346.16_PBXIP1	2081.23	-1.40005	0.132031	-10.604	2.85611e-26	7.74136e-25	2846.86	3828.69	1193.68	1204.49	1332.41
ENSG00000100342.20_APOL1	106.145	4.07681	0.384878	10.5925	3.22988e-26	8.74158e-25	4.86643	4.54309	228.774	156.94	135.603
ENSG00000130449.5_ZSWIM6	1888.25	0.954011	0.0900886	10.5897	3.32666e-26	8.99029e-25	1188.63	1218.68	2354.43	2431.13	2248.39
ENSG00000172936.12_MYD88	2531.74	1.31104	0.123814	10.5887	3.36084e-26	9.06935e-25	1270.14	1381.1	3797.15	3310.18	2900.16
ENSG00000196954.12_CASP4	704.278	1.46663	0.138521	10.5878	3.3964e-26	9.15189e-25	366.199	307.794	1031.6	943.565	872.234
ENSG00000128165.8_ADM2	94.7186	3.99931	0.378214	10.5742	3.92413e-26	1.05432e-24	3.64982	5.67886	135.07	146.349	182.845
ENSG00000165102.14_HGSNAT	2555.46	-1.14273	0.108069	-10.5741	3.9298e-26	1.05432e-24	3947.89	3688.99	1843.7	1784.11	1512.63
ENSG00000170390.14_DCLK2	444.451	-1.51942	0.143693	-10.5741	3.92994e-26	1.05432e-24	720.231	749.61	228.774	244.557	279.08
ENSG00000105085.10_MED26	832.553	1.55641	0.147206	10.573	3.97475e-26	1.06479e-24	401.48	353.225	1045.95	1043.7	1318.41
ENSG00000197044.10_ZNF441	464.903	1.62855	0.154076	10.5698	4.1141e-26	1.10052e-24	228.722	174.909	652.556	620.057	648.27
ENSG00000198963.10_RORB	204.564	2.27657	0.215726	10.5531	4.91539e-26	1.31296e-24	62.047	53.3813	326.7	275.367	305.326
ENSG00000135269.17_TES	5677.55	-0.826412	0.0784041	-10.5404	5.62484e-26	1.50028e-24	7342.22	8060.58	4361.06	4351.95	4271.93
ENSG00000109519.12_GRPEL1	1917.73	0.963138	0.0916123	10.5132	7.51113e-26	2.0005e-24	1259.19	1174.39	2290.28	2409.94	2454.85
ENSG00000158480.10_SPATA2	865.546	1.18369	0.112665	10.5062	8.08534e-26	2.15033e-24	485.426	488.382	1073.8	1180.42	1099.7
ENSG00000178234.12_GALNT11	933.441	-1.08332	0.10318	-10.4993	8.69834e-26	2.31002e-24	1365.03	1376.56	657.621	654.719	613.276
ENSG00000164040.16_PGRMC2	4017.57	-1.02906	0.0980542	-10.4949	9.12143e-26	2.41889e-24	5982.06	5630.03	3119.27	2678.57	2677.94
ENSG00000094916.13_CBX5	9747.52	-0.823611	0.0785361	-10.487	9.90782e-26	2.62365e-24	13301.2	13120.4	7696.44	7648.66	6970.87
ENSG00000095383.19_TBC1D2	2911.86	-0.905853	0.0865801	-10.4626	1.28297e-25	3.39249e-24	3927.21	4175.1	2058.13	2136.5	2262.38
ENSG00000169851.15_PCDH7	2854.85	-1.08909	0.104108	-10.4611	1.30324e-25	3.44115e-24	4040.35	4359.1	2100.33	2023.85	1750.59
ENSG00000133401.15_PDZD2	759.361	1.64318	0.157108	10.4589	1.33357e-25	3.51619e-24	306.585	345.275	1203.81	1061.03	880.108
ENSG00000257219.5_RP11-54A9.1	141.292	2.83037	0.270631	10.4584	1.34082e-25	3.53026e-24	23.1155	28.3943	214.423	244.557	195.968
ENSG00000102271.13_KLHL4	371.501	-1.65414	0.158462	-10.4387	1.65077e-25	4.34012e-24	599.787	670.106	181.5	183.899	222.214
ENSG00000158186.12_MRAS	1927.1	-0.891985	0.0855129	-10.431	1.78998e-25	4.69939e-24	2625.44	2713.36	1449.47	1460.6	1386.65
ENSG00000203668.1_CHML	1483.54	-1.07568	0.103284	-10.4149	2.12121e-25	5.56107e-24	2333.45	2014.86	1045.95	1023.48	999.963
ENSG00000121858.10_TNFSF10	103.749	4.4243	0.424978	10.4106	2.21727e-25	5.80465e-24	0	3.40732	246.502	155.977	112.857
ENSG00000064666.14_CNN2	16340.7	-0.889732	0.0854975	-10.4065	2.31504e-25	6.05198e-24	21196.9	24043.2	11691.1	12082.5	12689.8
ENSG00000133316.15_WDR74	1382.99	1.29384	0.124369	10.4033	2.39602e-25	6.25479e-24	701.982	759.832	1629.28	1779.29	2044.54
ENSG00000137942.16_FNBP1L	2298.61	-1.21114	0.116618	-10.3855	2.88605e-25	7.52336e-24	3371.22	3634.47	1666.42	1517.41	1303.54
ENSG00000134326.11_CMPK2	1743.61	4.76074	0.458543	10.3823	2.98402e-25	7.76774e-24	3.64982	21.5797	3245.05	2921.2	2526.59
ENSG00000169439.11_SDC2	2094.25	-0.979977	0.0944204	-10.3789	3.09428e-25	8.04337e-24	3014.75	2948.47	1563.43	1558.81	1385.78
ENSG00000131480.8_AOC2	174.776	2.58447	0.249387	10.3633	3.6418e-25	9.45327e-24	47.4477	30.6659	237.216	262.85	295.702
ENSG00000107104.18_KANK1	2343.35	-1.19611	0.115422	-10.3629	3.65582e-25	9.47629e-24	3462.46	3649.24	1677.4	1603.1	1324.54
ENSG00000137269.14_LRRC1	1175.32	-1.25633	0.121254	-10.3611	3.72556e-25	9.64349e-24	1717.85	1909.23	769.898	816.473	663.143
ENSG00000184117.11_NIPSNAP1	2757.78	-0.832402	0.0803526	-10.3594	3.79469e-25	9.80864e-24	3719.17	3777.58	2041.24	2077.77	2173.15
ENSG00000213928.8_IRF9	1298.87	1.0953	0.105835	10.3491	4.22252e-25	1.08992e-23	734.831	799.584	1749.15	1561.7	1649.11
ENSG00000176887.6_SOX11	3932.42	1.05489	0.101979	10.3442	4.44775e-25	1.14645e-23	2293.3	2455.54	4522.3	4944.09	5446.87
ENSG00000216490.3_IFI30	285.488	2.08125	0.201462	10.3308	5.11435e-25	1.31643e-23	108.278	76.0968	454.172	418.828	370.065
ENSG00000170689.9_HOXB9	87.0111	3.90337	0.378017	10.3259	5.38096e-25	1.38312e-23	4.86643	4.54309	124.095	150.2	151.351
ENSG00000142156.14_COL6A1	2209.47	-0.925722	0.0896942	-10.3209	5.67107e-25	1.45565e-23	2940.54	3246.04	1592.98	1601.17	1666.61
ENSG00000133026.12_MYH10	7975.22	-0.958722	0.0928966	-10.3203	5.70395e-25	1.46205e-23	10782.8	11779.1	6176.91	5835.66	5301.64
ENSG00000147224.10_PRPS1	4143.69	-1.11448	0.108027	-10.3167	5.92293e-25	1.51607e-23	6819.08	5465.34	2776.53	2927.94	2729.56
ENSG00000181026.14_AEN	2445.94	1.14129	0.110673	10.3122	6.2055e-25	1.5862e-23	1372.33	1444.7	2814.52	3121.47	3476.69
ENSG00000110057.7_UNC93B1	809.506	1.36856	0.132807	10.3049	6.69706e-25	1.70947e-23	357.683	461.124	1105.88	1048.51	1074.33
ENSG00000169495.4_HTRA4	226.605	-2.19563	0.213144	-10.3012	6.96116e-25	1.77442e-23	357.683	511.098	84.4186	81.8399	97.9842
ENSG00000132561.13_MATN2	2594.29	-1.15944	0.112681	-10.2896	7.85001e-25	1.99822e-23	3873.68	3918.42	1915.46	1760.04	1503.88
ENSG00000125319.14_C17orf53	381.963	1.63452	0.159186	10.268	9.81785e-25	2.49569e-23	173.975	155.601	484.563	540.143	555.535
ENSG00000100219.16_XBP1	2895.75	0.814521	0.079365	10.263	1.03468e-24	2.62652e-23	1967.25	2002.37	3469.6	3442.09	3597.42
ENSG00000076706.14_MCAM	3423.38	-0.848488	0.0828372	-10.2428	1.27442e-24	3.23063e-23	4575.66	4779.33	2717.43	2557.25	2487.22
ENSG00000029153.14_ARNTL2	2034.1	0.851714	0.0831539	10.2426	1.27713e-24	3.23305e-23	1357.73	1377.69	2486.97	2488.89	2459.23
ENSG00000164736.5_SOX17	102.608	3.46631	0.338577	10.2379	1.34165e-24	3.39173e-23	6.08304	13.6293	158.707	148.275	186.345
ENSG00000160469.16_BRSK1	632.275	1.37471	0.134285	10.2372	1.35088e-24	3.41037e-23	334.567	303.251	774.119	849.209	900.23
ENSG00000176595.3_KBTBD11	1848.36	-0.85241	0.0833297	-10.2294	1.46471e-24	3.69269e-23	2508.64	2548.67	1403.04	1381.65	1399.77
ENSG00000169594.12_BNC1	3592.15	-0.980202	0.0959413	-10.2167	1.66947e-24	4.20314e-23	4812.9	5416.5	2621.2	2711.31	2398.86
ENSG00000112576.12_CCND3	2294.71	1.06151	0.103956	10.2112	1.76686e-24	4.44226e-23	1498.86	1262.98	2822.96	2835.51	3053.26
ENSG00000113391.16_FAM172A	780.589	-1.13726	0.111426	-10.2064	1.85594e-24	4.65985e-23	1171.59	1158.49	557.163	507.407	508.293
ENSG00000203811.1_HIST2H3C	123.895	3.12925	0.306828	10.1987	2.00939e-24	5.0314e-23	19.4657	14.765	157.863	206.044	221.339
ENSG00000203852.3_HIST2H3A	123.895	3.12925	0.306828	10.1987	2.00939e-24	5.0314e-23	19.4657	14.765	157.863	206.044	221.339
ENSG00000119729.10_RHOQ	4145.87	-0.951882	0.0933654	-10.1952	2.08259e-24	5.20761e-23	5977.19	5727.7	3214.66	3062.74	2747.06
ENSG00000185787.14_MORF4L1	10282.7	-0.740907	0.07268	-10.1941	2.10712e-24	5.2618e-23	13919.2	13210.2	8278.09	8185.91	7820.36
ENSG00000084112.14_SSH1	8484.25	-0.948128	0.0931019	-10.1838	2.3432e-24	5.84338e-23	11588.2	12336.8	6591.4	6308.41	5596.47
ENSG00000113504.19_SLC12A7	1677.76	1.11737	0.109737	10.1822	2.38013e-24	5.91945e-23	908.806	1048.32	1990.59	2167.31	2273.76
ENSG00000140443.13_IGF1R	3997.99	-0.939632	0.0922808	-10.1823	2.37854e-24	5.91945e-23	5547.73	5697.04	3161.48	2876.91	2706.81
ENSG00000113811.10_SELK	1261.66	1.41025	0.138517	10.1811	2.40916e-24	5.98356e-23	692.25	554.257	1561.74	1586.73	1913.32
ENSG00000145687.15_SSBP2	391.265	-1.58442	0.155664	-10.1785	2.4745e-24	6.13755e-23	728.748	587.195	215.267	219.523	205.592
ENSG00000154914.16_USP43	256.196	1.88697	0.185606	10.1665	2.79672e-24	6.92744e-23	90.0289	97.6765	338.519	380.315	374.439
ENSG00000182752.9_PAPPA	8111.52	-1.05077	0.1036	-10.1425	3.57743e-24	8.84933e-23	11837.6	11763.2	5987.81	6042.67	4926.33
ENSG00000138449.10_SLC40A1	174.469	-1.9673	0.194223	-10.1291	4.10394e-24	1.01381e-22	313.885	325.967	79.3535	77.0258	76.1127
ENSG00000166444.17_ST5	1644.44	-1.07684	0.106316	-10.1286	4.12307e-24	1.01717e-22	2206.93	2614.55	1155.69	1150.57	1094.45
ENSG00000142303.13_ADAMTS10	355.044	-1.69384	0.167235	-10.1285	4.13097e-24	1.01776e-22	531.657	693.957	184.877	181.011	183.72
ENSG00000006576.16_PHTF2	1653.21	-0.956641	0.0945144	-10.1216	4.42924e-24	1.08978e-22	2354.14	2320.38	1257.84	1211.23	1122.44
ENSG00000131773.13_KHDRBS3	1441.17	1.01141	0.0999829	10.1159	4.69896e-24	1.1546e-22	941.654	840.472	1860.59	1760.04	1803.08
ENSG00000196843.15_ARID5A	1193.03	1.79557	0.177679	10.1057	5.21288e-24	1.27917e-22	391.748	536.085	1394.6	1587.69	2055.04
ENSG00000136478.7_TEX2	2428.44	-1.11547	0.110394	-10.1044	5.28198e-24	1.2944e-22	3227.66	3974.07	1654.6	1712.86	1573
ENSG00000118160.13_SLC8A2	71.6089	4.30277	0.426171	10.0963	5.73378e-24	1.40325e-22	0	2.27155	113.121	108.799	133.853
ENSG00000133048.12_CHI3L1	126.444	-2.46503	0.244197	-10.0944	5.84703e-24	1.42907e-22	233.589	274.857	39.6767	49.1039	34.9943
ENSG00000249859.7_PVT1	573.638	1.2951	0.128325	10.0923	5.97445e-24	1.45827e-22	313.885	291.894	729.377	750.038	782.998
ENSG00000142627.12_EPHA2	8382.67	1.08868	0.107931	10.0868	6.31809e-24	1.54011e-22	4381	5553.93	10205.4	10787.5	10985.6
ENSG00000184156.15_KCNQ3	333.12	1.60446	0.159313	10.0711	7.41089e-24	1.8041e-22	142.343	149.922	452.484	474.671	446.178
ENSG00000128872.9_TMOD2	429.365	-1.51391	0.150347	-10.0695	7.53949e-24	1.83298e-22	723.881	695.093	254.944	263.813	209.091
ENSG00000135480.14_KRT7	22501.3	-1.50564	0.149908	-10.0438	9.78355e-24	2.37541e-22	28876.2	45345.7	12943.1	13019.3	12322.4
ENSG00000060718.18_COL11A1	6133.43	-1.42955	0.142361	-10.0417	9.99179e-24	2.42278e-22	8359.31	11481.5	4104.43	3518.15	3203.73
ENSG00000072041.16_SLC6A15	912.487	1.12879	0.112458	10.0374	1.04385e-23	2.52777e-22	558.423	499.74	1137.96	1214.12	1152.19
ENSG00000117475.13_BLZF1	1736.05	1.12767	0.11237	10.0354	1.06558e-23	2.57699e-22	1031.68	982.444	2400.86	2282.85	1982.43
ENSG00000236453.5_AC003092.1	75.0903	4.01463	0.400094	10.0342	1.07809e-23	2.60382e-22	3.64982	2.27155	119.874	118.427	131.229
ENSG00000102181.19_CD99L2	2410.59	-0.837195	0.0834376	-10.0338	1.08287e-23	2.61195e-22	3159.53	3403.91	1818.38	1840.92	1830.2
ENSG00000198053.11_SIRPA	3442.86	-0.842526	0.083973	-10.0333	1.0883e-23	2.62161e-22	4669.34	4721.41	2721.66	2649.69	2452.23
ENSG00000129226.13_CD68	2010	1.05995	0.105861	10.0127	1.34075e-23	3.22551e-22	1284.74	1135.77	2721.66	2545.7	2362.12
ENSG00000163041.9_H3F3A	7456.61	-0.69897	0.0698766	-10.0029	1.47973e-23	3.55521e-22	9877.63	9522.32	6000.47	5844.33	6038.27
ENSG00000148734.7_NPFFR1	72.8445	4.08332	0.40857	9.99417	1.61643e-23	3.87858e-22	3.64982	1.13577	123.251	124.204	111.982
ENSG00000277462.1_ZNF670	329.404	1.72617	0.172722	9.99393	1.62022e-23	3.88261e-22	130.177	137.429	410.274	476.597	492.545
ENSG00000078081.7_LAMP3	76.8723	4.50651	0.450941	9.99356	1.62628e-23	3.89208e-22	0	0	176.435	121.316	86.611
ENSG00000067141.16_NEO1	4054.79	-1.25322	0.125611	-9.97698	1.92221e-23	4.59433e-22	5795.92	6713.55	2888.8	2682.42	2193.27
ENSG00000143479.15_DYRK3	1033.59	1.11945	0.112229	9.97469	1.96716e-23	4.69566e-22	626.553	578.108	1251.08	1303.66	1408.52
ENSG00000080823.21_MOK	955.666	1.06035	0.106363	9.96916	2.07972e-23	4.95792e-22	599.787	550.85	1227.45	1202.56	1197.68
ENSG00000170545.16_SMAGP	488.893	1.45665	0.146136	9.96781	2.10824e-23	5.01942e-22	242.105	227.155	617.944	722.116	635.147
ENSG00000008517.16_IL32	523.968	1.58785	0.159349	9.9646	2.17746e-23	5.17751e-22	194.657	269.178	753.858	725.005	677.141
ENSG00000122335.13_SERAC1	556.026	-1.31546	0.132127	-9.95599	2.37444e-23	5.6386e-22	884.473	860.916	379.039	339.876	315.824
ENSG00000154016.13_GRAP	69.4198	4.36017	0.438722	9.93834	2.83514e-23	6.72395e-22	0	1.13577	101.302	102.059	142.602
ENSG00000159842.14_ABR	9247.52	-0.681122	0.0685443	-9.93697	2.87451e-23	6.80856e-22	12052.9	11860.9	7374.81	7635.18	7313.82
ENSG00000109586.11_GALNT7	3954.92	-0.865822	0.0871327	-9.93682	2.87866e-23	6.80963e-22	5535.56	5333.59	3158.94	2963.57	2782.93
ENSG00000122861.15_PLAU	5022.03	1.05707	0.106394	9.93546	2.91821e-23	6.89432e-22	2837.13	3217.64	7062.46	6008.01	5984.91
ENSG00000117394.19_SLC2A1	16394	-0.76549	0.077057	-9.93407	2.95913e-23	6.98203e-22	21526.6	22082.8	13468.1	12794.9	12097.5
ENSG00000055332.16_EIF2AK2	7270.5	1.30179	0.131048	9.93369	2.97067e-23	7.00028e-22	4028.19	3615.17	11209.1	9463.58	8036.45
ENSG00000140465.13_CYP1A1	91.8597	3.44247	0.346629	9.93128	3.04338e-23	7.16246e-22	7.29964	10.222	135.07	139.609	167.098
ENSG00000164308.16_ERAP2	270.236	2.01856	0.20334	9.92703	3.17576e-23	7.46445e-22	92.4622	88.5903	457.549	368.761	343.819
ENSG00000077782.19_FGFR1	6838.72	-0.691227	0.0697362	-9.91203	3.69063e-23	8.66358e-22	8916.51	8829.5	5436.56	5391.8	5619.22
ENSG00000133107.14_TRPC4	597.222	1.2279	0.123902	9.91026	3.75679e-23	8.80763e-22	335.784	319.152	758.923	796.254	776
ENSG00000095739.10_BAMBI	1963	1.28813	0.130095	9.90145	4.10264e-23	9.60622e-22	951.387	1127.82	2353.59	2423.42	2958.77
ENSG00000170802.15_FOXN2	1299.89	1.04378	0.105525	9.89131	4.54053e-23	1.0618e-21	843.109	735.981	1669.8	1671.46	1579.12
ENSG00000204381.11_LAYN	2230.12	-0.861862	0.0871515	-9.88924	4.63518e-23	1.08256e-21	3039.08	3081.35	1656.29	1766.78	1607.12
ENSG00000164574.15_GALNT10	5280.25	-0.980454	0.0991467	-9.88893	4.64989e-23	1.08462e-21	6903.03	8137.81	3830.92	3969.71	3559.8
ENSG00000154133.14_ROBO4	216.72	2.02004	0.20429	9.88808	4.68931e-23	1.09243e-21	82.7293	62.4675	311.505	302.326	324.573
ENSG00000086619.13_ERO1LB	368.804	1.56185	0.158	9.88516	4.82786e-23	1.12187e-21	154.509	177.181	477.809	531.478	503.044
ENSG00000105402.7_NAPA	3378.27	0.737836	0.0746402	9.88524	4.82403e-23	1.12187e-21	2407.67	2406.7	4022.55	4017.86	4036.6
ENSG00000119508.17_NR4A3	115.236	2.79713	0.282969	9.88496	4.83753e-23	1.1227e-21	20.6823	21.5797	171.37	185.825	176.721
ENSG00000147509.13_RGS20	716.909	1.67122	0.169153	9.87996	5.08551e-23	1.17876e-21	369.849	233.969	1005.43	975.339	999.963
ENSG00000092098.16_RNF31	1555.72	0.897097	0.090836	9.876	5.29029e-23	1.22469e-21	1015.87	1026.74	1862.27	1961.27	1912.44
ENSG00000170962.12_PDGFD	234.524	-1.77563	0.180003	-9.86445	5.93612e-23	1.37247e-21	411.213	414.557	130.005	113.613	103.233
ENSG00000108828.15_VAT1	9595.44	-0.793779	0.0805382	-9.85592	6.462e-23	1.49031e-21	12668.5	13094.3	6914.73	7614	7685.63
ENSG00000124126.13_PREX1	1444.81	1.04011	0.10553	9.85599	6.45779e-23	1.49031e-21	947.737	810.942	1795.58	1787.96	1881.82
ENSG00000123384.13_LRP1	41273.8	-0.820892	0.0833437	-9.84948	6.89028e-23	1.58709e-21	52731.4	59070.4	31520.2	32964.1	30082.9
ENSG00000250722.5_SEPP1	119.269	-2.91036	0.295663	-9.84351	7.31115e-23	1.68193e-21	201.957	311.202	32.0791	32.7359	18.372
ENSG00000144746.6_ARL6IP5	4738.1	-0.794812	0.0808039	-9.8363	7.8546e-23	1.8047e-21	6635.38	6091.15	3737.21	3691.46	3535.3
ENSG00000142494.13_SLC47A1	408.725	-1.58332	0.161047	-9.83142	8.24501e-23	1.89203e-21	654.535	720.08	229.619	251.297	188.095
ENSG00000072195.14_SPEG	3386.14	-1.03426	0.10522	-9.8295	8.4037e-23	1.92605e-21	4788.57	5016.71	2132.41	2357.95	2635.07
ENSG00000049323.15_LTBP1	797.021	-1.68323	0.171259	-9.82857	8.48174e-23	1.94152e-21	1125.36	1620.75	424.626	458.303	356.067
ENSG00000178104.19_PDE4DIP	7807.78	-0.872794	0.0889252	-9.81492	9.7117e-23	2.2203e-21	11219.6	10286.7	6162.56	5951.2	5418.87
ENSG00000087303.16_NID2	1741.01	-1.05807	0.107814	-9.8139	9.81023e-23	2.24004e-21	2702.08	2376.04	1275.56	1242.04	1109.32
ENSG00000154380.16_ENAH	7353.51	-0.884171	0.0900981	-9.81343	9.85593e-23	2.24769e-21	9692.71	10635.4	5867.09	5436.09	5136.3
ENSG00000144711.13_IQSEC1	903.34	-1.01488	0.103468	-9.80865	1.03343e-22	2.35387e-21	1327.32	1273.2	635.672	657.607	622.899
ENSG00000178726.6_THBD	143.148	2.43512	0.24847	9.80046	1.12077e-22	2.54965e-21	37.7148	32.9374	225.398	217.598	202.092
ENSG00000111530.12_CAND1	5874.74	-0.772696	0.078844	-9.80031	1.12236e-22	2.55011e-21	7625.69	8039	4704.65	4657.17	4347.17
ENSG00000249992.1_TMEM158	1401.06	0.979534	0.099962	9.79906	1.13637e-22	2.57877e-21	863.791	897.261	1711.16	1680.12	1852.95
ENSG00000167767.13_KRT80	1031.98	-1.26649	0.129321	-9.79339	1.20202e-22	2.72439e-21	1452.63	1743.41	710.805	663.384	589.655
ENSG00000136514.2_RTP4	79.8853	3.69585	0.377567	9.78859	1.26047e-22	2.85127e-21	2.43321	7.95041	134.226	117.464	137.353
ENSG00000177464.4_GPR4	100.801	3.2146	0.328404	9.78853	1.26111e-22	2.85127e-21	10.9495	13.6293	187.409	151.163	140.852
ENSG00000100364.18_KIAA0930	1926.39	-0.813639	0.0831274	-9.78786	1.26957e-22	2.86689e-21	2647.34	2558.9	1472.26	1474.08	1479.39
ENSG00000108515.17_ENO3	207.404	1.98	0.202357	9.78465	1.31043e-22	2.95554e-21	76.6463	65.8748	298.842	285.958	309.7
ENSG00000143816.7_WNT9A	553.327	-1.45652	0.148886	-9.78278	1.33486e-22	3.00565e-21	827.293	975.629	284.491	319.657	359.567
ENSG00000177519.3_RPRM	77.1425	-3.13647	0.320614	-9.7827	1.33592e-22	3.00565e-21	147.209	194.217	11.8186	20.2193	12.248
ENSG00000128266.8_GNAZ	523.415	-1.55749	0.159237	-9.78097	1.35906e-22	3.05398e-21	740.914	1008.57	281.114	300.4	286.079
ENSG00000151702.16_FLI1	948.866	1.14365	0.116957	9.77838	1.39426e-22	3.12925e-21	594.921	496.333	1236.73	1206.42	1209.93
ENSG00000178401.14_DNAJC22	251.151	-1.90382	0.19473	-9.77672	1.41732e-22	3.17715e-21	414.863	495.197	137.602	103.985	104.108
ENSG00000156345.17_CDK20	620.016	1.29844	0.132852	9.7736	1.46162e-22	3.27246e-21	339.433	313.473	754.702	819.361	873.109
ENSG00000234745.9_HLA-B	9438.25	2.41983	0.247839	9.76372	1.61138e-22	3.60337e-21	1804.23	2907.58	15391.2	13741.4	13346.8
ENSG00000089327.14_FXYD5	3721.07	0.733463	0.0752088	9.75236	1.80229e-22	4.0254e-21	2706.95	2607.73	4444.64	4379.88	4466.15
ENSG00000111799.20_COL12A1	13241.3	-1.0751	0.110253	-9.75118	1.82333e-22	4.06747e-21	17453.4	21363.9	9447.29	9673.47	8268.29
ENSG00000003989.16_SLC7A2	329.777	1.81342	0.186076	9.74555	1.92728e-22	4.29414e-21	133.827	119.256	525.084	471.783	398.936
ENSG00000129038.15_LOXL1	7317.84	-0.874938	0.0898092	-9.74219	1.99218e-22	4.43339e-21	9482.24	10688.8	5529.42	5154.95	5733.82
ENSG00000182218.9_HHIPL1	428.769	-1.32709	0.136241	-9.74073	2.02103e-22	4.49215e-21	644.802	705.315	254.944	266.702	272.081
ENSG00000169925.16_BRD3	2000.31	-0.972713	0.0999773	-9.72933	2.26071e-22	5.01882e-21	2829.83	2855.33	1531.35	1478.89	1306.16
ENSG00000170581.13_STAT2	6859.76	1.15331	0.11857	9.72681	2.31743e-22	5.13856e-21	3825.01	4016.09	10028.1	8893.59	7536.03
ENSG00000272869.5_CTC-487M23.8	163.198	2.64514	0.272078	9.72199	2.42986e-22	5.38137e-21	24.3321	43.1594	204.293	268.627	275.58
ENSG00000143842.14_SOX13	276.649	1.67654	0.172527	9.71758	2.53733e-22	5.61263e-21	120.444	111.306	383.26	393.794	374.439
ENSG00000167106.11_FAM102A	1623.16	-1.04418	0.107474	-9.71573	2.58394e-22	5.70886e-21	2258.02	2456.68	1065.36	1089.91	1245.8
ENSG00000156475.18_PPP2R2B	416.913	-1.52684	0.157315	-9.70567	2.85205e-22	6.29367e-21	772.546	611.046	240.593	241.668	218.715
ENSG00000184232.8_OAF	1935.67	1.11256	0.114661	9.70305	2.9263e-22	6.44977e-21	1142.39	1121.01	2368.79	2259.74	2786.42
ENSG00000104368.17_PLAT	431.847	1.46325	0.150879	9.69817	3.06944e-22	6.75716e-21	183.708	228.29	589.242	590.21	567.783
ENSG00000174705.11_SH3PXD2B	3123.24	-0.959628	0.0990097	-9.69226	3.25246e-22	7.15153e-21	4203.38	4637.36	2381.45	2331.95	2062.04
ENSG00000091879.13_ANGPT2	103.965	3.06491	0.316535	9.6827	3.57148e-22	7.84361e-21	14.5993	14.765	173.058	180.048	137.353
ENSG00000152689.17_RASGRP3	496.796	1.80683	0.186637	9.68101	3.63097e-22	7.96476e-21	182.491	199.896	851.784	675.901	573.907
ENSG00000115008.5_IL1A	72.7654	3.9303	0.40606	9.67913	3.69853e-22	8.1033e-21	4.86643	1.13577	138.446	103.022	116.356
ENSG00000213064.9_SFT2D2	4426.29	-0.818916	0.0848892	-9.64688	5.06727e-22	1.10889e-20	5871.35	6111.59	3527.01	3463.27	3158.24
ENSG00000107731.12_UNC5B	490.815	-1.50387	0.155981	-9.64137	5.347e-22	1.16872e-20	708.065	910.89	254.944	288.847	291.328
ENSG00000243156.7_MICAL3	4882.57	-0.694175	0.0720242	-9.63808	5.52093e-22	1.20531e-20	6398.14	6285.37	3996.38	3888.84	3844.13
ENSG00000159314.11_ARHGAP27	418.465	1.449	0.150407	9.63392	5.74953e-22	1.25372e-20	200.74	202.168	516.642	579.619	593.154
ENSG00000127666.9_TICAM1	793.515	1.39516	0.144838	9.63256	5.82623e-22	1.26895e-20	368.632	420.236	962.372	999.409	1216.93
ENSG00000182197.10_EXT1	9163.29	-0.693455	0.0720166	-9.62911	6.02501e-22	1.31069e-20	11930.1	11867.7	7647.48	7219.24	7151.97
ENSG00000196141.12_SPATS2L	4450.77	0.901347	0.0937111	9.61836	6.68889e-22	1.45339e-20	3001.37	2829.21	5856.96	5532.37	5033.94
ENSG00000125965.8_GDF5	539.446	-1.34735	0.140093	-9.6176	6.73827e-22	1.4624e-20	813.91	893.853	296.309	366.835	326.322
ENSG00000119139.16_TJP2	4298.11	0.745329	0.077498	9.6174	6.75186e-22	1.46362e-20	3153.45	2948.47	5049.92	5109.7	5229.03
ENSG00000171105.13_INSR	476.284	-1.41355	0.14708	-9.61071	7.20477e-22	1.55996e-20	694.683	840.472	299.686	284.995	261.583
ENSG00000164647.8_STEAP1	326.781	2.553	0.265659	9.61006	7.25063e-22	1.56804e-20	104.628	42.0236	565.605	502.593	419.057
ENSG00000185532.14_PRKG1	257.115	-1.63816	0.170522	-9.60674	7.48794e-22	1.61747e-20	414.863	462.26	146.888	133.832	127.729
ENSG00000181649.5_PHLDA2	1938.87	1.39718	0.145551	9.59925	8.05302e-22	1.73749e-20	1042.63	883.631	2516.52	2190.42	3061.13
ENSG00000206077.10_ZDHHC11B	136.994	-2.36476	0.246622	-9.58862	8.9267e-22	1.92374e-20	250.621	293.029	59.9372	38.5129	42.8681
ENSG00000115380.18_EFEMP1	5074.42	-1.16813	0.121874	-9.58473	9.27018e-22	1.99542e-20	7320.33	7968.58	3757.47	3500.82	2824.92
ENSG00000128487.16_SPECC1	2694.91	-1.16061	0.121125	-9.5819	9.52799e-22	2.04852e-20	3506.26	4595.34	1844.55	1811.07	1717.35
ENSG00000167333.12_TRIM68	603.087	-1.11985	0.116918	-9.57808	9.88656e-22	2.12313e-20	896.64	894.989	394.235	414.013	415.558
ENSG00000141447.16_OSBPL1A	1719.77	-0.873769	0.0912344	-9.57719	9.97216e-22	2.13902e-20	2360.22	2378.31	1296.67	1344.1	1219.55
ENSG00000237927.1_RP3-393E18.2	75.6174	3.85166	0.402265	9.57492	1.01939e-21	2.18403e-20	2.43321	4.54309	100.458	118.427	152.225
ENSG00000119408.16_NEK6	4765.8	-0.733243	0.0765948	-9.57301	1.03837e-21	2.2221e-20	6303.24	6239.94	3738.06	3920.61	3627.16
ENSG00000142798.16_HSPG2	21635.4	-0.842332	0.0880428	-9.5673	1.09736e-21	2.34563e-20	27384.6	31634.7	15839.5	17105.5	16212.9
ENSG00000075651.15_PLD1	800.269	-1.45689	0.152284	-9.56698	1.10073e-21	2.35011e-20	1254.32	1354.98	539.435	474.671	377.939
ENSG00000128422.15_KRT17	105.245	2.99177	0.312847	9.56304	1.1435e-21	2.43858e-20	14.5993	17.0366	140.979	164.643	188.969
ENSG00000131203.12_IDO1	59.1484	4.3237	0.452362	9.55806	1.19988e-21	2.55586e-20	0	0	118.186	95.3194	82.2367
ENSG00000196396.9_PTPN1	5856.35	-0.695571	0.0727762	-9.55767	1.2044e-21	2.56251e-20	7497.95	7722.12	4798.35	4714.94	4548.39
ENSG00000143153.12_ATP1B1	4081.67	-0.787384	0.0824466	-9.55023	1.2941e-21	2.75019e-20	5222.89	5714.07	3219.73	3197.53	3054.13
ENSG00000159674.11_SPON2	627.314	-1.7198	0.180125	-9.54785	1.3242e-21	2.8109e-20	902.723	1278.88	267.607	322.545	364.816
ENSG00000179148.9_ALOXE3	75.1853	3.76605	0.394458	9.5474	1.32994e-21	2.81984e-20	2.43321	5.67886	113.965	106.873	146.976
ENSG00000205542.10_TMSB4X	49041.6	-0.653261	0.0684518	-9.54336	1.38274e-21	2.92841e-20	63847.5	61786	38922	39326.5	41325.7
ENSG00000130338.12_TULP4	2738.05	-1.0282	0.107802	-9.53788	1.45778e-21	3.0838e-20	3794.6	4120.58	1959.36	2101.84	1713.85
ENSG00000091129.19_NRCAM	99.8398	2.9356	0.307807	9.53716	1.46798e-21	3.1018e-20	13.3827	18.1724	157.863	163.68	146.101
ENSG00000158769.17_F11R	1123.64	-1.35489	0.142107	-9.53431	1.50883e-21	3.18447e-20	1597.41	1968.29	697.298	766.406	588.78
ENSG00000019144.16_PHLDB1	5853.71	-0.956183	0.100304	-9.53286	1.53007e-21	3.22559e-20	7636.64	8916.95	3924.62	4306.7	4483.65
ENSG00000076351.12_SLC46A1	676.329	-1.1173	0.117212	-9.53229	1.53852e-21	3.23969e-20	1000.05	1007.43	429.691	484.299	460.176
ENSG00000187189.10_TSPYL4	1167.04	-0.909436	0.0954088	-9.53199	1.54295e-21	3.2453e-20	1639.99	1612.8	888.084	849.209	845.113
ENSG00000125538.11_IL1B	92.1212	3.29218	0.345455	9.52999	1.57297e-21	3.30468e-20	13.3827	6.81464	156.174	161.754	122.48
ENSG00000143248.12_RGS5	6064.73	-1.03661	0.108796	-9.52801	1.60326e-21	3.36447e-20	8406.76	9171.37	4552.69	4498.3	3694.53
ENSG00000055483.19_USP36	2491.2	0.771698	0.0810466	9.52166	1.70438e-21	3.5726e-20	1745.83	1743.41	2927.64	2978.01	3061.13
ENSG00000138758.11_SEPT11	15589.6	-0.817726	0.0859146	-9.51789	1.76728e-21	3.70023e-20	21634.9	20556.4	12439.1	12373.2	10944.5
ENSG00000063046.17_EIF4B	15100.7	-0.682204	0.0716993	-9.51479	1.82081e-21	3.80798e-20	19869.6	19199.1	12435.7	12361.7	11637.4
ENSG00000105889.14_STEAP1B	234.785	1.81899	0.191426	9.50234	2.05229e-21	4.28722e-20	99.7618	79.5041	335.986	334.099	324.573
ENSG00000122644.12_ARL4A	943.689	1.07945	0.113602	9.5021	2.05691e-21	4.29071e-20	560.856	562.208	1108.42	1242.04	1244.92
ENSG00000127129.9_EDN2	160.055	-2.06432	0.217251	-9.50202	2.05863e-21	4.29071e-20	262.787	337.325	68.3791	63.5462	68.239
ENSG00000165271.16_NOL6	3323.99	0.897806	0.0945178	9.4988	2.12322e-21	4.42034e-20	2099.86	2261.32	3770.13	4193.09	4295.56
ENSG00000183688.4_FAM101B	2426.94	-0.929086	0.0979818	-9.48223	2.48908e-21	5.17617e-20	3490.45	3315.32	1630.12	1789.89	1908.94
ENSG00000187243.16_MAGED4B	1745.18	-0.912179	0.0962154	-9.48058	2.52862e-21	5.25246e-20	2328.59	2539.59	1273.03	1229.52	1355.16
ENSG00000089159.15_PXN	7834.84	0.736507	0.0777694	9.47039	2.78796e-21	5.78463e-20	5849.45	5322.23	9264.1	9200.73	9537.71
ENSG00000172301.10_COPRS	2418.86	-0.796656	0.0841644	-9.46547	2.92236e-21	6.05665e-20	3318.9	3182.44	1789.67	1917.94	1885.32
ENSG00000204947.8_ZNF425	489.248	1.29356	0.136727	9.46083	3.05496e-21	6.32436e-20	262.787	253.277	606.97	665.31	657.894
ENSG00000205978.5_NYNRIN	219.993	-1.94046	0.205168	-9.45792	3.14123e-21	6.49564e-20	363.766	440.68	107.212	78.9514	109.357
ENSG00000149798.4_CDC42EP2	804.856	1.12827	0.119365	9.45228	3.31539e-21	6.84808e-20	461.094	471.346	991.074	988.818	1111.95
ENSG00000131013.3_PPIL4	2540.29	0.788315	0.0834115	9.45091	3.35889e-21	6.93015e-20	1804.23	1724.1	3158.1	3010.74	3004.26
ENSG00000272325.1_NUDT3	1993.02	-0.975491	0.103345	-9.43913	3.75876e-21	7.74649e-20	2852.94	2817.85	1570.19	1415.35	1308.79
ENSG00000149257.13_SERPINH1	10046.1	-0.787836	0.0835011	-9.43505	3.90821e-21	8.04548e-20	12566.3	14358.4	7716.7	7710.28	7878.98
ENSG00000196449.3_YRDC	1067.81	0.98962	0.104912	9.43289	3.9895e-21	8.20366e-20	661.834	672.378	1263.75	1361.43	1379.65
ENSG00000254122.2_PCDHGB7	631.145	-1.42742	0.151378	-9.42951	4.1199e-21	8.46234e-20	928.271	1114.19	414.495	380.315	318.449
ENSG00000180914.10_OXTR	11285.2	-0.852817	0.0904652	-9.42703	4.21876e-21	8.65575e-20	16408.4	14483.4	8809.92	8776.12	7948.09
ENSG00000087245.12_MMP2	18671.4	-1.0461	0.111066	-9.41877	4.56393e-21	9.35351e-20	23715.3	30562.5	13280.7	13430.4	12367.9
ENSG00000184500.14_PROS1	1636.37	-1.28313	0.136298	-9.41412	4.77078e-21	9.76657e-20	2309.12	2784.92	1172.57	1026.37	888.856
ENSG00000188522.14_FAM83G	1519.23	1.07022	0.113792	9.40509	5.19864e-21	1.06306e-19	845.542	971.086	1777.86	1925.64	2076.04
ENSG00000112992.16_NNT	3344.45	-0.86513	0.0920026	-9.40332	5.28676e-21	1.07988e-19	4574.44	4616.92	2685.36	2534.15	2311.38
ENSG00000058085.14_LAMC2	672.339	1.11138	0.118233	9.39992	5.46058e-21	1.11415e-19	399.047	387.299	887.239	848.246	839.864
ENSG00000081320.10_STK17B	1300.65	0.901794	0.0959674	9.39687	5.62089e-21	1.14559e-19	822.427	880.224	1611.55	1610.8	1578.24
ENSG00000052802.12_MSMO1	7605.28	-0.722682	0.0769454	-9.39214	5.87957e-21	1.19699e-19	9568.62	10378.7	6163.4	6062.89	5852.8
ENSG00000112763.15_BTN2A1	1405.38	0.86214	0.0918454	9.38686	6.18139e-21	1.25704e-19	923.405	955.185	1724.67	1698.42	1725.22
ENSG00000153976.2_HS3ST3A1	1050.75	1.18333	0.126108	9.38347	6.38341e-21	1.29669e-19	563.289	616.725	1280.63	1269.96	1523.13
ENSG00000136950.13_ARPC5L	2190.05	0.817543	0.0871597	9.37983	6.60798e-21	1.34083e-19	1562.12	1434.48	2625.42	2637.17	2691.07
ENSG00000175229.6_GAL3ST3	102.964	-2.47424	0.263892	-9.37595	6.85535e-21	1.38949e-19	182.491	233.969	28.7023	34.6616	34.9943
ENSG00000122863.5_CHST3	3138.2	-0.736879	0.0786144	-9.37333	7.02824e-21	1.42297e-19	4006.29	4263.69	2481.91	2486.01	2453.1
ENSG00000125812.15_GZF1	1114.74	0.943507	0.100688	9.37058	7.21323e-21	1.45882e-19	742.13	686.007	1394.6	1373.95	1377.03
ENSG00000156453.13_PCDH1	246.405	1.86006	0.198522	9.36956	7.28367e-21	1.47145e-19	74.213	107.898	344.428	348.542	356.942
ENSG00000139211.6_AMIGO2	4787.4	-0.924072	0.0986617	-9.36607	7.52804e-21	1.51914e-19	6275.26	7129.25	3635.91	3677.98	3218.6
ENSG00000029993.14_HMGB3	1699.25	-0.835855	0.0892804	-9.36214	7.81373e-21	1.57507e-19	2335.89	2290.85	1300.05	1235.3	1334.16
ENSG00000104825.16_NFKBIB	898.977	1.49234	0.159443	9.3597	7.99651e-21	1.61015e-19	422.163	420.236	1042.57	1132.28	1477.64
ENSG00000105426.14_PTPRS	3168.5	-0.76912	0.0822198	-9.35443	8.40481e-21	1.69051e-19	4062.25	4377.27	2393.27	2502.37	2507.34
ENSG00000153721.17_CNKSR3	783.521	1.0605	0.113385	9.35309	8.51242e-21	1.71029e-19	492.726	449.766	984.321	982.078	1008.71
ENSG00000162642.13_C1orf52	834.412	1.03479	0.110719	9.34617	9.08824e-21	1.82399e-19	513.408	504.283	1056.92	1010	1087.45
ENSG00000049192.14_ADAMTS6	824.204	1.33219	0.142545	9.3458	9.12005e-21	1.82838e-19	452.578	397.52	1207.19	1119.76	943.972
ENSG00000242732.4_RGAG4	476.736	1.26876	0.135812	9.34203	9.45007e-21	1.89248e-19	256.704	253.277	602.749	620.057	650.895
ENSG00000183765.20_CHEK2	462.241	1.2795	0.136985	9.34041	9.59657e-21	1.91973e-19	250.621	240.784	593.463	629.686	596.654
ENSG00000108854.15_SMURF2	8013.96	0.97988	0.104998	9.33233	1.03566e-20	2.06953e-19	5288.59	4778.2	11001.4	10060.5	8941.06
ENSG00000251369.8_ZNF550	563.544	1.19642	0.12824	9.32954	1.06329e-20	2.12243e-19	332.134	296.437	727.688	723.079	738.381
ENSG00000203805.10_PPAPDC1A	2557.14	-0.942469	0.101057	-9.32613	1.09804e-20	2.18942e-19	3335.94	3865.04	1881.69	1950.68	1752.34
ENSG00000099864.17_PALM	1206.1	-1.44131	0.154576	-9.3243	1.11718e-20	2.22518e-19	1650.94	2267	627.23	687.455	797.871
ENSG00000054654.15_SYNE2	2131.41	-0.980747	0.105232	-9.31986	1.16498e-20	2.31787e-19	3168.05	2906.44	1609.86	1598.28	1374.4
ENSG00000253537.2_PCDHGA7	234.22	-1.88277	0.202091	-9.31647	1.20278e-20	2.39049e-19	409.997	436.137	98.7698	91.4681	134.728
ENSG00000105650.21_PDE4C	68.6217	3.66734	0.393746	9.31395	1.2316e-20	2.44513e-19	4.86643	3.40732	116.498	120.353	97.9842
ENSG00000060491.16_OGFR	2126.15	1.41313	0.151729	9.3135	1.23692e-20	2.45055e-19	908.806	1180.07	2582.36	2565.92	3393.58
ENSG00000179954.14_SSC5D	1223.7	-1.26597	0.135929	-9.31349	1.23699e-20	2.45055e-19	1609.57	2181.82	779.184	778.923	769.001
ENSG00000165996.13_HACD1	1128.66	-0.958032	0.102884	-9.31181	1.2567e-20	2.48691e-19	1681.35	1512.85	797.756	838.618	812.744
ENSG00000122359.17_ANXA11	5028.07	-0.71662	0.0770877	-9.29616	1.45604e-20	2.87829e-19	6395.7	6765.8	3936.44	3905.21	4137.21
ENSG00000072657.8_TRHDE	2964.44	-0.857847	0.0923637	-9.28771	1.57648e-20	3.10971e-19	3955.19	4172.83	2332.49	2304.03	2057.67
ENSG00000104081.13_BMF	350.691	-1.75337	0.188784	-9.28771	1.57639e-20	3.10971e-19	508.542	721.216	163.772	195.453	164.473
ENSG00000140511.11_HAPLN3	361.548	1.61358	0.173833	9.28234	1.65791e-20	3.26682e-19	169.108	145.379	503.135	438.084	552.036
ENSG00000141232.4_TOB1	3084.3	0.804609	0.0867044	9.27991	1.69626e-20	3.33882e-19	2243.42	2004.64	3785.33	3714.57	3673.53
ENSG00000115525.16_ST3GAL5	303.88	-2.15754	0.232844	-9.26606	1.93143e-20	3.79766e-19	446.495	715.537	148.577	102.059	106.733
ENSG00000162702.7_ZNF281	3614.41	-0.943955	0.101895	-9.264	1.96912e-20	3.86763e-19	5112.18	5072.36	2843.22	2708.42	2335.87
ENSG00000092964.16_DPYSL2	7151.54	-0.817728	0.0882968	-9.26113	2.02282e-20	3.96887e-19	9640.4	9716.54	5848.52	5531.41	5020.81
ENSG00000125247.15_TMTC4	739.421	-1.15056	0.124246	-9.26034	2.03788e-20	3.99417e-19	1102.25	1115.33	544.5	486.225	448.802
ENSG00000168291.12_PDHB	3202.52	-0.72281	0.0780621	-9.25943	2.05536e-20	4.02413e-19	4278.81	4121.72	2557.88	2587.1	2467.1
ENSG00000197536.10_C5orf56	276.079	2.1126	0.228338	9.2521	2.20115e-20	4.30498e-19	105.845	65.8748	459.237	417.865	331.571
ENSG00000165731.17_RET	84.2178	3.13937	0.339385	9.25015	2.24168e-20	4.3796e-19	8.51625	12.4935	146.044	128.055	125.98
ENSG00000171388.11_APLN	80.3852	3.36889	0.364509	9.24228	2.41303e-20	4.70937e-19	4.86643	10.222	113.121	123.241	150.476
ENSG00000158125.9_XDH	313.946	1.65776	0.179521	9.23434	2.59881e-20	5.06657e-19	122.877	141.972	441.509	477.56	385.813
ENSG00000128602.9_SMO	728.661	-1.17124	0.126911	-9.22879	2.73715e-20	5.33064e-19	1021.95	1175.52	449.107	519.924	476.798
ENSG00000164930.11_FZD6	2930.15	-0.813534	0.0883489	-9.2082	3.31644e-20	6.45198e-19	3850.56	4069.47	2340.93	2285.74	2104.04
ENSG00000026950.16_BTN3A1	565.09	1.56529	0.17005	9.20491	3.41967e-20	6.64579e-19	245.755	260.092	929.449	718.265	671.891
ENSG00000162493.16_PDPN	4321.15	-0.954919	0.103772	-9.20212	3.50942e-20	6.81302e-19	5975.97	6242.21	3440.9	3162.87	2783.8
ENSG00000120539.14_MASTL	1147.34	1.2281	0.133499	9.19931	3.60247e-20	6.98628e-19	609.52	646.255	1712.85	1446.16	1321.91
ENSG00000185262.8_UBALD2	1119.79	1.46951	0.15979	9.19653	3.69699e-20	7.16204e-19	472.044	590.602	1295.83	1436.53	1803.96
ENSG00000075624.13_ACTB	277038	-0.688062	0.0748538	-9.19209	3.85298e-20	7.45639e-19	347611	370631	229021	226706	211221
ENSG00000184205.14_TSPYL2	1351.83	0.922878	0.100431	9.18913	3.96038e-20	7.65618e-19	885.69	864.323	1568.5	1711.9	1728.72
ENSG00000141258.12_SGSM2	1965.82	-0.807639	0.0879079	-9.18733	4.02714e-20	7.77707e-19	2547.58	2755.38	1476.48	1530.89	1518.75
ENSG00000118495.18_PLAGL1	904.775	1.0531	0.114636	9.18643	4.06086e-20	7.83397e-19	577.888	514.505	1161.6	1183.31	1086.57
ENSG00000124006.14_OBSL1	3270.79	-1.01364	0.11037	-9.18398	4.1543e-20	8.00584e-19	4287.32	5129.15	2135.79	2303.07	2498.6
ENSG00000127528.5_KLF2	406.214	1.56422	0.170363	9.18168	4.24421e-20	8.17055e-19	150.859	212.39	544.5	536.292	587.03
ENSG00000070413.18_DGCR2	2970.3	-0.878928	0.0957439	-9.17998	4.31157e-20	8.29155e-19	3905.31	4294.36	2087.67	2183.68	2380.49
ENSG00000130635.15_COL5A1	3218.82	-1.13669	0.124028	-9.16482	4.96309e-20	9.53451e-19	4118.22	5496	2256.51	2072.96	2150.4
ENSG00000162704.15_ARPC5	6695.84	-0.719678	0.0786315	-9.15255	5.56071e-20	1.06715e-18	8488.27	9057.79	5555.59	5218.49	5159.04
ENSG00000143416.20_SELENBP1	323.58	-1.51002	0.165149	-9.14341	6.0516e-20	1.16014e-18	482.993	587.195	169.681	182.936	195.093
ENSG00000114126.17_TFDP2	1092.62	-1.0591	0.115857	-9.14144	6.16284e-20	1.18024e-18	1474.53	1715.02	812.107	732.707	728.757
ENSG00000108861.8_DUSP3	3822.2	-0.704719	0.0771012	-9.14019	6.23433e-20	1.19269e-18	4816.55	5148.46	3026.41	3073.33	3046.26
ENSG00000106546.12_AHR	3008.97	0.775045	0.0848196	9.13756	6.38757e-20	1.22074e-18	2204.49	2002.37	3582.73	3687.61	3567.67
ENSG00000183760.10_PAPL	75.9819	3.24763	0.355427	9.13725	6.40591e-20	1.22297e-18	9.73286	6.81464	113.965	125.167	124.23
ENSG00000138078.15_PREPL	3507.11	-0.83691	0.0916159	-9.13499	6.54133e-20	1.24753e-18	4795.87	4756.62	2833.09	2706.49	2443.48
ENSG00000261115.5_TMEM178B	1104.43	-1.01534	0.111184	-9.13202	6.72331e-20	1.28091e-18	1542.66	1638.92	839.121	787.588	713.885
ENSG00000007168.12_PAFAH1B1	6490.39	-0.632288	0.0692421	-9.13156	6.75206e-20	1.28506e-18	8313.08	8195.74	5357.2	5373.51	5212.41
ENSG00000251201.8_TMED7-TICAM2	854.096	1.03456	0.113394	9.12355	7.27006e-20	1.38221e-18	526.791	514.505	1018.93	1076.43	1133.82
ENSG00000151502.10_VPS26B	1935.19	-0.824128	0.0903343	-9.12309	7.30147e-20	1.38675e-18	2554.88	2694.05	1419.92	1457.71	1549.37
ENSG00000164932.12_CTHRC1	124.464	-2.3107	0.253519	-9.11449	7.90389e-20	1.49962e-18	218.989	271.45	54.8721	38.5129	38.4938
ENSG00000104549.11_SQLE	4954.61	-0.737306	0.0809471	-9.10849	8.3533e-20	1.58326e-18	6372.59	6687.43	4047.03	3969.71	3696.28
ENSG00000148848.14_ADAM12	720.566	-1.11753	0.122785	-9.10152	8.90755e-20	1.68657e-18	1159.43	981.308	492.16	485.262	484.672
ENSG00000100439.10_ABHD4	1687.98	-0.92517	0.101714	-9.09576	9.39245e-20	1.77655e-18	2227.61	2500.97	1180.17	1217.97	1313.16
ENSG00000124226.10_RNF114	2343.06	0.846289	0.0930527	9.09474	9.48171e-20	1.7916e-18	1649.72	1508.31	2996.86	2832.62	2727.81
ENSG00000140464.19_PML	5922.34	1.12224	0.123399	9.09445	9.50641e-20	1.79442e-18	3209.41	3669.68	8725.51	7399.29	6607.81
ENSG00000197943.9_PLCG2	181.995	1.94196	0.213591	9.09196	9.72732e-20	1.83424e-18	66.9134	60.196	248.191	279.218	255.459
ENSG00000075240.16_GRAMD4	679.38	-1.26617	0.139399	-9.083	1.0562e-19	1.98959e-18	964.77	1141.45	431.379	385.129	474.173
ENSG00000111670.14_GNPTAB	4228.5	-1.1446	0.126019	-9.08272	1.05898e-19	1.99279e-18	6295.94	6364.87	3245.9	2879.8	2355.99
ENSG00000143702.15_CEP170	10226.1	0.996751	0.109772	9.08021	1.08367e-19	2.03716e-18	6366.51	6358.06	14184.9	13182	11039
ENSG00000104267.9_CA2	57.5319	3.87865	0.427162	9.08004	1.08538e-19	2.0383e-18	1.21661	2.27155	82.7302	98.2078	103.233
ENSG00000151690.14_MFSD6	1297.76	-1.03438	0.113958	-9.07687	1.1174e-19	2.0963e-18	1779.9	1980.79	1002.05	871.354	854.737
ENSG00000172380.5_GNG12	10645.8	-0.718483	0.0793711	-9.0522	1.40121e-19	2.62605e-18	14029.9	13856.4	8840.32	8598	7904.35
ENSG00000188290.10_HES4	573.187	1.77592	0.196202	9.05153	1.40985e-19	2.63956e-18	225.072	222.611	658.465	723.079	1036.71
ENSG00000189241.6_TSPYL1	3763.36	-0.718606	0.0794092	-9.04939	1.43763e-19	2.68883e-18	5084.2	4774.79	3079.59	2959.71	2918.53
ENSG00000153904.18_DDAH1	10887.4	-0.824405	0.0911653	-9.04297	1.52466e-19	2.84872e-18	15191.8	14343.7	8686.67	8686.58	7528.16
ENSG00000072210.18_ALDH3A2	3270.94	-0.895632	0.0991892	-9.02952	1.72421e-19	3.21828e-18	4750.85	4328.43	2592.5	2468.68	2214.27
ENSG00000171992.12_SYNPO	1163.32	-0.920952	0.102074	-9.02235	1.84091e-19	3.43264e-18	1560.91	1693.44	812.107	876.168	873.984
ENSG00000177459.10_ERICH5	147.32	-2.07644	0.230185	-9.02072	1.86854e-19	3.48063e-18	279.82	274.857	62.4698	72.2116	47.2424
ENSG00000131711.14_MAP1B	40498	-1.00591	0.111609	-9.01272	2.01002e-19	3.74039e-18	60398.5	55942.5	31094.7	30582.1	24472.4
ENSG00000197467.13_COL13A1	237.106	1.74928	0.194209	9.00716	2.11452e-19	3.93088e-18	103.412	85.183	314.037	321.583	361.317
ENSG00000076716.8_GPC4	1160.94	-1.06902	0.118715	-9.00491	2.15835e-19	4.00831e-18	1646.07	1753.63	893.993	786.625	724.383
ENSG00000198794.11_SCAMP5	245.465	-1.53581	0.170577	-9.00362	2.18404e-19	4.05192e-18	409.997	407.742	130.005	129.981	149.601
ENSG00000163249.9_CCNYL1	1541.25	0.984234	0.109328	9.00256	2.20511e-19	4.08689e-18	970.853	959.728	2043.77	1998.82	1733.09
ENSG00000162852.13_CNST	1972.22	0.819364	0.091019	9.00212	2.21404e-19	4.09931e-18	1361.38	1333.4	2438.85	2467.71	2259.76
ENSG00000143199.17_ADCY10	48.4257	4.11549	0.457262	9.00028	2.25134e-19	4.16418e-18	0	0	74.2884	84.7283	83.1116
ENSG00000140961.12_OSGIN1	219.15	2.27382	0.252707	8.99786	2.30167e-19	4.25301e-18	60.8304	59.0602	243.97	321.583	410.309
ENSG00000112139.14_MDGA1	807.358	1.19705	0.133104	8.99334	2.39825e-19	4.42702e-18	473.26	425.915	942.956	1039.85	1154.81
ENSG00000085721.12_RRN3	2592.78	0.714977	0.0795386	8.98906	2.49343e-19	4.5981e-18	1835.86	1900.15	3098.16	3050.22	3079.5
ENSG00000255302.3_EID1	4958.14	-0.684806	0.0761943	-8.98764	2.52598e-19	4.65347e-18	6502.77	6338.75	4153.39	3906.17	3889.62
ENSG00000106460.18_TMEM106B	3323.15	-0.968134	0.10772	-8.98753	2.52857e-19	4.65358e-18	4934.56	4502.2	2629.64	2413.79	2135.53
ENSG00000173473.10_SMARCC1	6617.27	-0.864517	0.0961931	-8.98732	2.5334e-19	4.65781e-18	9355.71	8830.63	5365.65	5048.08	4486.28
ENSG00000065809.13_FAM107B	4262.91	-0.766796	0.0853272	-8.98654	2.55128e-19	4.686e-18	5473.52	5874.22	3410.51	3429.57	3126.74
ENSG00000136630.12_HLX	162.237	2.05319	0.228487	8.98603	2.56314e-19	4.7031e-18	51.0975	53.3813	215.267	236.854	254.584
ENSG00000131471.6_AOC3	72.5292	3.43436	0.382203	8.9857	2.57086e-19	4.71257e-18	9.73286	2.27155	100.458	124.204	125.98
ENSG00000170153.10_RNF150	274.234	-1.71673	0.191178	-8.97979	2.71283e-19	4.96785e-18	463.527	490.654	126.628	171.382	118.981
ENSG00000156427.7_FGF18	156.756	-1.99719	0.222525	-8.97513	2.83027e-19	5.17775e-18	249.404	331.646	70.0674	63.5462	69.1138
ENSG00000140853.15_NLRC5	1419.54	1.00708	0.112217	8.97439	2.84919e-19	5.2072e-18	835.809	919.976	1864.81	1862.1	1614.99
ENSG00000166562.8_SEC11C	1571.7	0.926987	0.103383	8.96656	3.05933e-19	5.5857e-18	1091.3	939.284	1927.28	1891.95	2008.68
ENSG00000196323.11_ZBTB44	1587.63	-0.888021	0.099055	-8.96493	3.10466e-19	5.66285e-18	2202.06	2194.31	1261.21	1185.23	1095.32
ENSG00000115738.9_ID2	1624.73	1.1832	0.132056	8.95982	3.25217e-19	5.92603e-18	1040.2	783.683	1939.1	2139.39	2221.27
ENSG00000167460.14_TPM4	39035.8	-0.682778	0.0762656	-8.95264	3.4708e-19	6.31817e-18	48930.7	52097.9	32862.5	31337.9	29949.9
ENSG00000096717.11_SIRT1	1459.47	0.913576	0.102073	8.95022	3.54777e-19	6.4519e-18	1003.7	894.989	1819.22	1862.1	1717.35
ENSG00000154319.14_FAM167A	260.596	1.6177	0.180808	8.94709	3.64969e-19	6.6307e-18	108.278	116.985	380.728	332.174	364.816
ENSG00000168297.15_PXK	1941.01	-0.8783	0.0982242	-8.94179	3.82908e-19	6.94975e-18	2719.12	2639.54	1570.19	1420.16	1356.03
ENSG00000189180.15_ZNF33A	918.069	-1.08739	0.121662	-8.93782	3.9694e-19	7.19732e-18	1339.48	1364.06	699.83	620.057	566.908
ENSG00000187595.14_ZNF385C	47.8075	4.09309	0.458081	8.93529	4.06114e-19	7.35642e-18	0	0	72.6	78.9514	87.4859
ENSG00000123243.14_ITIH5	693.689	-1.447	0.162413	-8.90936	5.13292e-19	9.27959e-18	951.387	1307.27	440.665	413.051	356.067
ENSG00000156463.17_SH3RF2	4371.12	-0.991123	0.111245	-8.90938	5.13176e-19	9.27959e-18	6482.08	6019.6	3452.72	3182.13	2719.06
ENSG00000154928.16_EPHB1	402.212	1.34086	0.150624	8.90204	5.48311e-19	9.90297e-18	222.639	189.674	547.877	509.333	541.537
ENSG00000124688.13_MAD2L1BP	892.405	1.02079	0.114696	8.89998	5.58555e-19	1.00781e-17	586.405	509.962	1122.77	1088.95	1153.94
ENSG00000137947.11_GTF2B	1201.13	0.963417	0.108315	8.89459	5.86351e-19	1.05692e-17	821.21	700.772	1519.53	1466.38	1497.76
ENSG00000176171.11_BNIP3	2529.62	1.1039	0.124141	8.89231	5.98492e-19	1.07775e-17	1575.51	1392.46	3717.79	3018.45	2943.9
ENSG00000117707.15_PROX1	100.789	2.79519	0.314501	8.88769	6.23918e-19	1.12244e-17	9.73286	24.987	152.798	159.828	156.6
ENSG00000163735.6_CXCL5	78.6786	3.09004	0.347853	8.88319	6.49726e-19	1.16773e-17	9.73286	10.222	118.186	112.65	142.602
ENSG00000105738.10_SIPA1L3	4029.98	0.698392	0.0787056	8.87348	7.08946e-19	1.27292e-17	2854.16	3000.71	4609.26	4790.04	4895.71
ENSG00000177150.12_FAM210A	960.802	0.922765	0.104022	8.8709	7.25592e-19	1.30154e-17	609.52	633.761	1199.59	1205.45	1155.69
ENSG00000120053.10_GOT1	1610.89	0.814804	0.0919009	8.86611	7.57429e-19	1.35732e-17	1120.5	1085.8	1913.77	1907.35	2027.05
ENSG00000183248.11_PRR36	235.071	-1.56924	0.177092	-8.86117	7.91783e-19	1.41751e-17	396.614	392.977	113.965	140.572	131.229
ENSG00000182199.10_SHMT2	4358.79	0.995099	0.112327	8.8589	8.08042e-19	1.44381e-17	2522.03	2904.17	4919.92	5385.06	6062.77
ENSG00000241978.9_AKAP2	15218	0.665197	0.0750872	8.859	8.07351e-19	1.44381e-17	11241.5	11238.5	18360.2	18378.3	16871.6
ENSG00000150551.10_LYPD1	2127.04	0.761824	0.0860369	8.85461	8.39751e-19	1.49901e-17	1468.44	1524.21	2562.95	2615.99	2463.6
ENSG00000163235.15_TGFA	212.287	1.78422	0.201513	8.85411	8.4355e-19	1.50433e-17	85.1625	79.5041	313.193	268.627	314.949
ENSG00000099958.14_DERL3	129.455	2.27429	0.257051	8.8476	8.94188e-19	1.59309e-17	34.065	36.3447	176.435	188.713	211.716
ENSG00000175567.8_UCP2	752.078	-0.973331	0.110014	-8.84733	8.96365e-19	1.59543e-17	1031.68	1107.38	533.526	540.143	547.662
ENSG00000170412.16_GPRC5C	1333.78	-1.15331	0.130468	-8.83977	9.59181e-19	1.70558e-17	1784.76	2219.3	792.691	928.16	943.972
ENSG00000123933.14_MXD4	1933.63	-1.09654	0.124079	-8.83743	9.79412e-19	1.73987e-17	2650.99	3058.64	1200.43	1250.71	1507.38
ENSG00000067445.20_TRO	846.128	-0.953909	0.10797	-8.83496	1.00134e-18	1.77712e-17	1146.04	1245.94	616.256	624.871	597.528
ENSG00000178568.13_ERBB4	108.253	-2.17913	0.246668	-8.83428	1.00745e-18	1.78624e-17	221.423	195.353	46.4302	40.4385	37.6189
ENSG00000138639.17_ARHGAP24	295.073	1.66613	0.188609	8.83378	1.01198e-18	1.79254e-17	107.061	139.7	391.702	379.352	457.551
ENSG00000170456.14_DENND5B	979.24	-0.984487	0.111483	-8.83087	1.03866e-18	1.83803e-17	1339.48	1454.93	695.609	750.038	656.144
ENSG00000169926.9_KLF13	558.18	-1.23261	0.139642	-8.82696	1.07562e-18	1.9016e-17	801.744	913.161	399.3	339.876	336.821
ENSG00000136997.14_MYC	3533.81	0.678615	0.076914	8.82303	1.11402e-18	1.9676e-17	2612.06	2573.66	4211.64	4040	4231.69
ENSG00000206503.11_HLA-A	12760	1.05983	0.120195	8.81764	1.16897e-18	2.06268e-17	6558.73	8774.98	17156.4	15587.1	15723
ENSG00000137203.10_TFAP2A	1117.04	-0.91288	0.103712	-8.80209	1.3429e-18	2.36732e-17	1584.02	1534.43	880.486	796.254	789.997
ENSG00000196850.5_PPTC7	1421.6	0.822423	0.0934502	8.80066	1.3602e-18	2.39551e-17	978.152	960.864	1727.2	1772.56	1669.23
ENSG00000146457.14_WTAP	4635.84	0.650771	0.0739891	8.79549	1.4242e-18	2.50583e-17	3485.58	3411.86	5440.78	5292.63	5548.35
ENSG00000173598.13_NUDT4	4847.91	0.620168	0.0705537	8.79002	1.49531e-18	2.62843e-17	3672.94	3649.24	5635.79	5652.73	5628.84
ENSG00000170891.10_CYTL1	759.68	-0.985317	0.112188	-8.78276	1.5951e-18	2.80116e-17	1091.3	1077.85	570.67	545.92	512.667
ENSG00000169018.5_FEM1B	4305.49	-0.897882	0.102268	-8.77966	1.63973e-18	2.87679e-17	5923.66	6036.63	3294.01	3451.72	2821.42
ENSG00000123983.13_ACSL3	4451.67	0.692804	0.0789284	8.77763	1.66957e-18	2.92636e-17	3132.76	3352.8	5424.74	5182.87	5165.17
ENSG00000137842.6_TMEM62	735.854	1.28457	0.146349	8.77749	1.67162e-18	2.92716e-17	341.867	436.137	1051.86	976.301	873.109
ENSG00000107562.16_CXCL12	131.138	-2.20898	0.251675	-8.77709	1.67753e-18	2.93472e-17	282.253	226.019	55.7163	36.5872	55.1161
ENSG00000069702.10_TGFBR3	259.23	1.80138	0.20529	8.77484	1.71153e-18	2.98851e-17	94.8954	103.355	384.949	411.125	301.826
ENSG00000223953.4_C1QTNF5	1175.08	-1.49709	0.170612	-8.77486	1.71116e-18	2.98851e-17	1625.39	2252.24	566.449	632.574	798.746
ENSG00000081853.14_PCDHGA2	213.404	-1.60134	0.182537	-8.77269	1.74456e-18	3.0433e-17	347.95	374.805	112.277	126.13	105.858
ENSG00000154127.9_UBASH3B	3729.55	0.831074	0.0947632	8.77001	1.78647e-18	3.11347e-17	2709.38	2355.59	4693.67	4592.66	4296.43
ENSG00000119698.11_PPP4R4	254.738	1.58943	0.181281	8.76779	1.82206e-18	3.17009e-17	100.978	122.663	347.805	341.802	360.442
ENSG00000198855.6_FICD	603.256	1.06469	0.121432	8.76777	1.82241e-18	3.17009e-17	369.849	353.225	751.326	770.258	771.625
ENSG00000218739.9_CEBPZOS	1452.37	-0.953706	0.108776	-8.76761	1.825e-18	3.1716e-17	2188.68	1918.32	1127.83	1034.07	992.965
ENSG00000035862.12_TIMP2	28186.9	-0.8091	0.0923033	-8.76567	1.85669e-18	3.22059e-17	38006.8	38089.3	23351	22034.2	19453.4
ENSG00000169155.9_ZBTB43	1249.4	0.882267	0.100649	8.76575	1.85537e-18	3.22059e-17	868.658	783.683	1566.81	1512.59	1515.26
ENSG00000156466.9_GDF6	330.564	-1.62622	0.185662	-8.75906	1.96893e-18	3.41207e-17	502.459	624.675	166.305	151.163	208.216
ENSG00000177842.11_ZNF620	237.84	1.64312	0.18761	8.75817	1.98444e-18	3.43571e-17	100.978	101.084	340.207	301.363	345.569
ENSG00000124422.11_USP22	13238	-0.670919	0.0766539	-8.75258	2.08539e-18	3.60709e-17	16409.6	17714.6	10244.2	10877	10944.5
ENSG00000139438.5_FAM222A	188.675	2.52998	0.289079	8.75187	2.09839e-18	3.62617e-17	34.065	48.8382	221.177	246.482	392.812
ENSG00000253731.2_PCDHGA6	360.68	-1.60706	0.183877	-8.73989	2.33338e-18	4.02848e-17	506.109	717.808	210.202	182.936	186.345
ENSG00000277443.1_MARCKS	11115.5	-0.652081	0.0746142	-8.73937	2.34423e-18	4.04342e-17	13678.3	14791.2	9195.72	8786.71	9125.65
ENSG00000099917.17_MED15	4965.59	0.618288	0.0707731	8.73621	2.41061e-18	4.15401e-17	3784.87	3721.93	5785.21	5803.89	5732.07
ENSG00000160710.15_ADAR	16557.9	0.874341	0.100106	8.73414	2.45525e-18	4.22698e-17	10979.9	11001.1	21927.7	21044.4	17836.6
ENSG00000122778.9_KIAA1549	1118.88	-0.846877	0.0970306	-8.72794	2.59346e-18	4.46075e-17	1490.34	1567.37	849.251	859.8	827.616
ENSG00000071246.10_VASH1	326.324	-1.55926	0.178712	-8.72494	2.66331e-18	4.57264e-17	480.56	613.317	186.565	195.453	155.725
ENSG00000241058.3_NSUN6	350.123	1.37039	0.157066	8.72493	2.66348e-18	4.57264e-17	167.892	183.995	449.107	454.452	495.17
ENSG00000110080.18_ST3GAL4	873.317	-0.933591	0.107042	-8.72172	2.74011e-18	4.69981e-17	1184.98	1268.66	623.009	626.797	663.143
ENSG00000136295.14_TTYH3	9863.78	-0.948155	0.108749	-8.71871	2.81382e-18	4.82175e-17	12486	15354.5	6704.52	7039.19	7734.63
ENSG00000113580.14_NR3C1	1910.16	0.828097	0.0949871	8.718	2.83159e-18	4.84768e-17	1355.3	1242.54	2296.19	2431.13	2225.64
ENSG00000030419.16_IKZF2	477.966	1.34076	0.15381	8.71695	2.858e-18	4.88834e-17	254.271	235.105	709.116	620.057	571.283
ENSG00000188687.15_SLC4A5	92.0027	2.71083	0.311177	8.71153	2.99813e-18	5.12327e-17	21.8989	12.4935	136.758	145.386	143.477
ENSG00000117479.12_SLC19A2	728.873	0.997513	0.114632	8.70187	3.26464e-18	5.57352e-17	435.545	470.21	899.902	916.606	922.101
ENSG00000272047.1_GTF2H5	988.028	-0.907741	0.104318	-8.70166	3.2705e-18	5.57835e-17	1446.55	1307.27	728.532	730.782	727.008
ENSG00000232956.8_SNHG15	755.001	1.31064	0.150644	8.70023	3.31225e-18	5.64431e-17	424.596	362.312	938.735	895.424	1153.94
ENSG00000112079.8_STK38	2737.62	-0.818063	0.0940971	-8.69382	3.50455e-18	5.96648e-17	3540.33	3871.85	2168.71	2161.54	1945.69
ENSG00000137221.14_TJAP1	1087.5	0.976685	0.112349	8.69332	3.52004e-18	5.98732e-17	659.401	707.586	1309.33	1294.03	1467.14
ENSG00000125430.8_HS3ST3B1	1896.85	0.799874	0.0920784	8.68689	3.72503e-18	6.33014e-17	1245.81	1370.88	2300.41	2340.62	2226.52
ENSG00000064309.14_CDON	223.71	-1.61022	0.185532	-8.67893	3.99513e-18	6.78287e-17	392.964	366.855	128.316	128.055	102.358
ENSG00000088888.17_MAVS	4436.26	-0.633336	0.072994	-8.67655	4.07948e-18	6.91766e-17	5565.98	5723.16	3574.28	3616.36	3701.53
ENSG00000164761.8_TNFRSF11B	111.377	2.78676	0.321185	8.67648	4.08204e-18	6.91766e-17	9.73286	28.3943	184.033	187.75	146.976
ENSG00000183963.18_SMTN	6353.44	0.929158	0.107118	8.67419	4.16518e-18	7.05207e-17	4075.63	4117.18	6987.33	7753.6	8833.45
ENSG00000120937.8_NPPB	108.171	2.40249	0.276987	8.67367	4.18399e-18	7.07741e-17	23.1155	29.5301	155.33	167.531	165.348
ENSG00000136158.10_SPRY2	2180.76	0.909621	0.104917	8.66995	4.3231e-18	7.306e-17	1282.3	1558.28	2641.46	2684.35	2737.43
ENSG00000113916.17_BCL6	1843.81	0.965202	0.111367	8.66686	4.44193e-18	7.49994e-17	1036.55	1294.78	2303.78	2304.03	2279.88
ENSG00000110104.11_CCDC86	1821.46	0.823269	0.0950066	8.66539	4.49989e-18	7.59083e-17	1253.11	1230.04	2093.58	2189.46	2341.12
ENSG00000189339.11_SLC35E2B	3391.39	-0.772401	0.089154	-8.66367	4.56813e-18	7.69888e-17	4258.13	4787.28	2535.93	2695.9	2679.69
ENSG00000163347.5_CLDN1	2048.89	0.960023	0.110814	8.6634	4.57916e-18	7.71042e-17	1209.31	1389.05	2752.89	2558.22	2335
ENSG00000145431.10_PDGFC	4588.84	-0.85444	0.0986518	-8.66117	4.66965e-18	7.8556e-17	5978.41	6594.3	3709.35	3515.26	3146.87
ENSG00000155363.18_MOV10	3243.69	0.890236	0.102803	8.65967	4.73146e-18	7.9523e-17	2239.77	2030.76	4354.31	3914.83	3678.78
ENSG00000132849.18_INADL	649.356	-1.16858	0.134989	-8.65683	4.85086e-18	8.14555e-17	947.737	1010.84	452.484	462.155	373.565
ENSG00000165323.15_FAT3	1332.73	-1.16923	0.13509	-8.65517	4.92194e-18	8.25738e-17	2286.01	1735.46	905.812	926.235	810.119
ENSG00000176170.13_SPHK1	2530.02	1.33698	0.154665	8.64432	5.41282e-18	9.07264e-17	1189.84	1403.82	2672.69	3389.13	3994.6
ENSG00000157557.11_ETS2	3459.32	0.91039	0.105337	8.64265	5.49221e-18	9.19732e-17	2017.13	2487.34	4160.15	4210.42	4421.54
ENSG00000099250.17_NRP1	5952.03	0.758031	0.0877122	8.64226	5.51128e-18	9.22087e-17	4337.2	4053.57	7482.02	7266.42	6620.93
ENSG00000197646.7_PDCD1LG2	559.098	1.2259	0.141903	8.63901	5.67007e-18	9.47793e-17	300.502	311.202	805.353	714.414	664.018
ENSG00000160741.16_CRTC2	1128.84	0.937171	0.108542	8.63414	5.91682e-18	9.88141e-17	720.231	729.166	1334.66	1352.76	1507.38
ENSG00000169032.9_MAP2K1	2822.51	0.682682	0.0790875	8.63199	6.02953e-18	1.00605e-16	2045.12	2087.55	3375.06	3357.36	3247.48
ENSG00000105655.18_ISYNA1	1714.59	-1.12494	0.130396	-8.62716	6.28941e-18	1.04846e-16	2191.11	2915.53	1116.86	1125.54	1223.93
ENSG00000157168.18_NRG1	1364.36	0.790747	0.0916771	8.62536	6.38939e-18	1.06417e-16	945.304	946.099	1660.51	1633.91	1635.99
ENSG00000118960.12_HS1BP3	618.408	-1.04926	0.121655	-8.62492	6.4138e-18	1.06726e-16	879.607	921.112	409.43	421.716	460.176
ENSG00000198642.6_KLHL9	1684.28	-0.996403	0.115638	-8.61661	6.89667e-18	1.14658e-16	2327.37	2498.7	1319.46	1219.9	1055.95
ENSG00000181904.8_C5orf24	3302.79	-0.851531	0.0988492	-8.61445	7.02769e-18	1.16731e-16	4592.69	4448.82	2725.03	2475.42	2272.01
ENSG00000064300.8_NGFR	53.2456	3.64901	0.423664	8.61299	7.11806e-18	1.18125e-16	1.21661	3.40732	77.6651	88.5796	95.3596
ENSG00000170873.18_MTSS1	229.89	1.71273	0.198953	8.60873	7.38734e-18	1.22483e-16	83.9459	102.22	353.714	294.624	314.949
ENSG00000077238.13_IL4R	835.277	0.995943	0.115698	8.60814	7.42565e-18	1.23008e-16	487.86	550.85	1088.16	1031.18	1018.34
ENSG00000082014.16_SMARCD3	1043.23	-1.03589	0.120407	-8.6032	7.75253e-18	1.28307e-16	1582.81	1442.43	648.335	777.96	764.626
ENSG00000132405.18_TBC1D14	2060.36	-0.714114	0.0830638	-8.59718	8.16984e-18	1.35092e-16	2653.42	2736.08	1615.77	1676.27	1620.24
ENSG00000184640.17_SEPT9	11976.6	-0.586283	0.0682232	-8.59359	8.42931e-18	1.39258e-16	14845	15137.6	9705.61	9990.24	10204.4
ENSG00000163694.14_RBM47	504.257	-1.25156	0.145782	-8.58514	9.07242e-18	1.49748e-16	770.112	788.226	368.065	306.177	288.703
ENSG00000198420.9_TCAF1	4477.46	-0.87815	0.102295	-8.58448	9.1249e-18	1.50479e-16	5888.38	6473.91	3671.36	3308.26	3045.38
ENSG00000273604.1_C17orf96	151.453	2.11483	0.24651	8.57909	9.56271e-18	1.57558e-16	36.4982	55.6529	201.76	235.891	227.463
ENSG00000141753.6_IGFBP4	1767.96	-1.03661	0.120854	-8.57736	9.70729e-18	1.59797e-16	2248.29	2880.32	1284.01	1191.01	1236.18
ENSG00000170899.10_GSTA4	334.783	-1.28507	0.149841	-8.57626	9.8012e-18	1.61199e-16	531.657	512.234	204.293	226.263	199.468
ENSG00000166317.11_SYNPO2L	165.451	-1.76845	0.206367	-8.56943	1.04e-17	1.70894e-16	289.553	294.165	69.2232	88.5796	85.7361
ENSG00000010539.11_ZNF200	469.875	1.16669	0.136238	8.56361	1.09392e-17	1.79594e-16	279.82	252.142	615.412	593.098	608.902
ENSG00000120708.16_TGFBI	17232	-1.12154	0.131157	-8.55113	1.21887e-17	1.9993e-16	21981.7	29298.4	12791.9	11813.8	10274.3
ENSG00000085224.20_ATRX	4800.21	-0.782684	0.0915334	-8.55079	1.22244e-17	2.00337e-16	6433.42	6414.85	3910.27	3863.8	3378.7
ENSG00000085276.17_MECOM	366.153	1.3683	0.160026	8.55051	1.22549e-17	2.00657e-16	170.325	197.624	489.628	520.887	452.302
ENSG00000047849.21_MAP4	19918.3	-0.654636	0.0765926	-8.54698	1.26347e-17	2.06617e-16	26068.2	24995	16705.6	16580.8	15241.8
ENSG00000075426.11_FOSL2	6783.78	-0.805449	0.0942384	-8.54692	1.26413e-17	2.06617e-16	8342.28	9951.64	5257.59	5098.14	5269.27
ENSG00000159164.9_SV2A	1068.62	-0.970834	0.113676	-8.54035	1.33816e-17	2.18523e-16	1410.05	1627.56	789.314	795.291	720.884
ENSG00000179862.6_CITED4	214.527	2.19226	0.256714	8.53968	1.34588e-17	2.19589e-16	63.2636	60.196	250.723	281.144	417.308
ENSG00000120889.12_TNFRSF10B	6845.99	0.708864	0.0830381	8.53661	1.38223e-17	2.25319e-16	4645.01	5247.27	8065.35	7995.27	8277.04
ENSG00000103485.17_QPRT	1691.4	-0.865255	0.101385	-8.53434	1.40952e-17	2.29565e-16	2165.56	2485.07	1257.84	1226.64	1321.91
ENSG00000106799.12_TGFBR1	2301.81	-0.886356	0.10386	-8.53417	1.41168e-17	2.29712e-16	2940.54	3431.17	1787.14	1746.56	1603.62
ENSG00000080644.15_CHRNA3	108.737	-2.45601	0.287894	-8.53093	1.45181e-17	2.36035e-16	164.242	277.129	32.9233	31.7731	37.6189
ENSG00000112343.10_TRIM38	1345.01	1.25099	0.146771	8.52346	1.54859e-17	2.51547e-16	709.282	740.524	2096.11	1693.6	1485.51
ENSG00000234465.10_PINLYP	137.429	2.16257	0.253788	8.52117	1.57956e-17	2.56351e-16	34.065	46.5667	195.851	185.825	224.839
ENSG00000180628.14_PCGF5	2672.57	0.869536	0.102082	8.51803	1.62292e-17	2.63156e-16	1798.15	1758.18	3586.95	3219.68	2999.89
ENSG00000162521.18_RBBP4	5594.73	-0.674486	0.0792162	-8.5145	1.67306e-17	2.71047e-16	6957.78	7482.47	4581.4	4620.58	4331.43
ENSG00000130147.15_SH3BP4	6616.98	-0.597838	0.0702183	-8.51399	1.68042e-17	2.72e-16	8364.17	8268.43	5478.77	5613.25	5360.26
ENSG00000196152.10_ZNF79	377.083	1.30981	0.153868	8.51258	1.701e-17	2.7509e-16	178.841	213.525	499.758	482.374	510.917
ENSG00000177628.15_GBA	3560.72	-0.667888	0.0784674	-8.51166	1.71457e-17	2.7704e-16	4507.53	4662.35	2955.5	2905.8	2772.43
ENSG00000105647.14_PIK3R2	4504.92	-0.856303	0.100614	-8.51076	1.72798e-17	2.78962e-16	5820.25	6530.69	3096.47	3423.79	3653.41
ENSG00000121440.14_PDZRN3	926.767	-1.0585	0.124401	-8.50872	1.75868e-17	2.83669e-16	1212.96	1493.54	662.686	618.132	646.521
ENSG00000137752.22_CASP1	135.15	2.55358	0.300419	8.50008	1.89465e-17	3.05334e-16	26.7654	30.6659	256.633	214.709	146.976
ENSG00000198720.12_ANKRD13B	485.043	-1.2672	0.14916	-8.49557	1.96969e-17	3.1715e-16	675.217	830.25	302.219	285.958	331.571
ENSG00000138050.14_THUMPD2	532.855	1.22056	0.143927	8.48043	2.24362e-17	3.6094e-16	323.618	261.228	687.167	731.745	660.518
ENSG00000136147.16_PHF11	924.271	1.26907	0.149663	8.47954	2.26088e-17	3.63399e-16	515.841	470.21	1435.96	1129.39	1069.95
ENSG00000151240.15_DIP2C	2437.83	-0.822801	0.0970956	-8.47413	2.36835e-17	3.80342e-16	3345.67	3266.48	1993.97	1882.32	1700.73
ENSG00000107338.9_SHB	2336.39	-0.854852	0.100887	-8.47334	2.38446e-17	3.82594e-16	2997.72	3405.05	1679.09	1714.79	1885.32
ENSG00000074219.13_TEAD2	1490.72	-0.961573	0.113516	-8.47081	2.43682e-17	3.90656e-16	1905.21	2320.38	1031.6	1087.99	1108.45
ENSG00000103222.18_ABCC1	5597.67	-0.636168	0.0751236	-8.46828	2.49041e-17	3.98899e-16	7168.25	7091.77	4765.43	4538.74	4424.16
ENSG00000082701.14_GSK3B	4298.09	-0.708451	0.0836691	-8.4673	2.51152e-17	4.01931e-16	5507.58	5715.21	3566.69	3490.23	3210.73
ENSG00000245532.5_NEAT1	13326.9	-0.995193	0.11754	-8.46684	2.52137e-17	4.03156e-16	21570.4	16608.4	9051.36	9145.85	10258.6
ENSG00000020181.17_ADGRA2	1327.65	-1.12092	0.132439	-8.46368	2.59076e-17	4.13891e-16	1723.93	2226.11	823.081	908.904	956.22
ENSG00000198715.11_GLMP	1869.29	-0.777404	0.0920302	-8.44727	2.98199e-17	4.7598e-16	2367.52	2627.04	1428.36	1443.27	1480.26
ENSG00000077097.13_TOP2B	6819.43	-0.752431	0.0890773	-8.44694	2.99028e-17	4.7689e-16	9309.48	8762.49	5645.07	5466.9	4913.21
ENSG00000142611.16_PRDM16	1441.35	-0.812782	0.0963179	-8.43854	3.21337e-17	5.12025e-16	1924.67	1971.7	1142.18	1133.24	1034.96
ENSG00000125735.10_TNFSF14	56.63	3.4021	0.403249	8.43673	3.26329e-17	5.1953e-16	2.43321	5.67886	100.458	91.4681	83.1116
ENSG00000168334.8_XIRP1	109.689	2.66226	0.315772	8.43094	3.429e-17	5.45439e-16	10.9495	30.6659	153.642	188.713	164.473
ENSG00000198561.12_CTNND1	8028.83	-0.750651	0.0890385	-8.43063	3.438e-17	5.46399e-16	10532.2	10731.9	6671.6	6471.13	5737.32
ENSG00000094804.9_CDC6	1850.52	0.766064	0.0908862	8.42883	3.49152e-17	5.54425e-16	1315.15	1282.29	2110.46	2286.7	2258.01
ENSG00000160094.14_ZNF362	525.927	-1.14353	0.135684	-8.42788	3.51971e-17	5.5842e-16	737.264	838.2	376.507	350.467	327.197
ENSG00000106683.14_LIMK1	3405.21	-0.806468	0.0957007	-8.42698	3.54708e-17	5.62278e-16	4235.01	4950.83	2535.93	2700.72	2603.58
ENSG00000137497.17_NUMA1	7570.83	-0.569387	0.0675741	-8.42611	3.57338e-17	5.6596e-16	9335.03	9506.42	6269.77	6345.96	6396.97
ENSG00000186472.19_PCLO	589.356	-1.29765	0.154068	-8.42254	3.68414e-17	5.83001e-16	884.473	960.864	428.846	362.021	310.575
ENSG00000204060.5_FOXO6	89.9885	-2.18111	0.259048	-8.41974	3.77331e-17	5.96598e-16	169.108	178.316	34.6116	34.6616	33.2446
ENSG00000143502.14_SUSD4	63.0543	3.25165	0.386292	8.4176	3.84291e-17	6.07081e-16	9.73286	2.27155	103.835	104.948	94.4847
ENSG00000187479.5_C11orf96	122.078	2.22436	0.264284	8.41654	3.87775e-17	6.12059e-16	36.4982	31.8016	177.279	162.717	202.092
ENSG00000196159.11_FAT4	912.479	-1.20922	0.143678	-8.41618	3.88948e-17	6.13385e-16	1556.04	1230.04	589.242	659.533	527.54
ENSG00000241839.9_PLEKHO2	1032.19	1.13459	0.134861	8.41301	3.99623e-17	6.29679e-16	549.906	638.304	1155.69	1369.13	1447.89
ENSG00000197429.10_IPP	395.552	-1.18086	0.140406	-8.41029	4.08987e-17	6.43883e-16	631.419	566.751	265.919	259.962	253.709
ENSG00000121769.7_FABP3	1518.72	-0.823627	0.0979988	-8.40446	4.2983e-17	6.76119e-16	1940.49	2179.55	1182.7	1164.05	1126.82
ENSG00000168961.16_LGALS9	75.0763	3.48472	0.414661	8.40377	4.32383e-17	6.79554e-16	4.86643	4.54309	181.5	103.985	80.487
ENSG00000154358.19_OBSCN	1187	-0.964891	0.114823	-8.4033	4.3411e-17	6.81685e-16	1646.07	1721.83	771.586	941.64	853.862
ENSG00000226979.8_LTA	43.8839	3.90867	0.465217	8.40181	4.39651e-17	6.89799e-16	0	0	63.3139	61.6206	94.4847
ENSG00000140941.12_MAP1LC3B	9206.77	0.596142	0.0710128	8.39485	4.66481e-17	7.3127e-16	7215.7	6853.25	10587.8	10485.1	10892
ENSG00000113319.11_RASGRF2	306.08	1.44761	0.172457	8.39406	4.69637e-17	7.35592e-16	158.159	135.157	414.495	442.898	379.689
ENSG00000154781.15_CCDC174	848.499	1.08036	0.128784	8.38895	4.90507e-17	7.67627e-16	470.827	536.085	1003.74	1044.66	1187.18
ENSG00000163884.3_KLF15	73.8909	3.02743	0.36107	8.38462	5.0892e-17	7.95766e-16	12.1661	6.81464	95.393	120.353	134.728
ENSG00000226137.5_BAIAP2-AS1	331.271	-1.30644	0.155829	-8.38377	5.12594e-17	8.0083e-16	540.174	499.74	192.474	197.378	226.588
ENSG00000107819.13_SFXN3	1879.12	-0.709029	0.0845807	-8.38288	5.16482e-17	8.0622e-16	2410.1	2497.56	1517.85	1502.96	1467.14
ENSG00000184164.14_CRELD2	2247.13	0.983106	0.117348	8.37773	5.39595e-17	8.41586e-16	1481.83	1332.26	2518.21	2755.6	3147.74
ENSG00000008735.13_MAPK8IP2	161.082	2.18956	0.261385	8.37675	5.44108e-17	8.47906e-16	35.2816	56.7886	194.163	253.222	265.957
ENSG00000110218.8_PANX1	1495.63	0.807258	0.0963893	8.37497	5.52379e-17	8.60066e-16	996.401	1058.54	1846.23	1854.39	1722.6
ENSG00000134247.9_PTGFRN	1034.05	-1.07932	0.128929	-8.37146	5.69089e-17	8.85335e-16	1474.53	1565.09	803.665	706.711	620.275
ENSG00000122870.11_BICC1	2621.38	-1.00075	0.119578	-8.36906	5.80796e-17	9.02785e-16	3654.69	3868.44	2073.32	1920.83	1589.62
ENSG00000141510.15_TP53	3532.09	-0.6986	0.0834991	-8.36655	5.93289e-17	9.21426e-16	4391.95	4799.78	2811.14	2909.65	2747.93
ENSG00000136643.11_RPS6KC1	1103.37	0.815963	0.097534	8.36594	5.96373e-17	9.24654e-16	750.647	758.696	1327.06	1348.91	1331.53
ENSG00000156711.16_MAPK13	352.169	1.33892	0.160043	8.36602	5.95988e-17	9.24654e-16	195.874	164.687	493.005	460.229	447.053
ENSG00000196576.14_PLXNB2	18115.5	-0.715116	0.0854862	-8.36527	5.99756e-17	9.29117e-16	22279.7	25130.1	13684.3	14991.1	14492
ENSG00000050327.14_ARHGEF5	1059.42	-0.9558	0.114299	-8.36228	6.15193e-17	9.5223e-16	1434.38	1563.96	828.991	766.406	703.386
ENSG00000197647.11_ZNF433	234.461	1.5335	0.18341	8.36108	6.21482e-17	9.61155e-16	110.711	102.22	312.349	311.954	335.071
ENSG00000100626.16_GALNT16	473.19	-1.11527	0.133568	-8.34982	6.83653e-17	1.05642e-15	681.3	724.623	340.207	320.62	299.202
ENSG00000105968.18_H2AFV	3241.14	-0.737184	0.0883067	-8.348	6.94289e-17	1.07195e-15	4544.03	4002.46	2560.42	2529.33	2569.46
ENSG00000100031.18_GGT1	108.175	2.82237	0.338135	8.34687	7.00962e-17	1.08135e-15	9.73286	24.987	124.095	198.341	183.72
ENSG00000198142.4_SOWAHC	718.417	1.0008	0.11998	8.34135	7.34478e-17	1.1321e-15	453.795	437.273	947.177	906.978	846.863
ENSG00000170271.10_FAXDC2	158.41	-1.96025	0.235472	-8.32475	8.45063e-17	1.30147e-15	312.668	271.45	52.3395	84.7283	70.8635
ENSG00000113389.15_NPR3	444.875	-1.50668	0.181017	-8.32341	8.54672e-17	1.31517e-15	834.593	639.44	292.933	247.445	209.966
ENSG00000175556.16_LONRF3	109.527	2.60874	0.313769	8.31421	9.23654e-17	1.42013e-15	29.1986	14.765	136.758	166.568	200.343
ENSG00000104290.10_FZD3	390.543	-1.22609	0.147509	-8.312	9.41033e-17	1.44564e-15	604.654	594.009	275.205	252.259	226.588
ENSG00000114790.12_ARHGEF26	524.688	-1.16182	0.139803	-8.31041	9.53742e-17	1.46394e-15	812.694	767.782	369.753	368.761	304.451
ENSG00000086065.13_CHMP5	2870.19	0.699265	0.0841532	8.30943	9.61619e-17	1.4748e-15	2090.13	2077.33	3566.69	3335.22	3281.59
ENSG00000040731.10_CDH10	220.971	-1.55717	0.187422	-8.30832	9.7067e-17	1.48744e-15	390.531	350.954	128.316	130.944	104.108
ENSG00000176049.15_JAKMIP2	325.772	-1.2602	0.15177	-8.30339	1.01181e-16	1.5492e-15	529.224	480.432	215.267	207.97	195.968
ENSG00000102921.7_N4BP1	2255.2	1.01524	0.122294	8.30165	1.02679e-16	1.57002e-15	1310.29	1464.01	3197.78	2811.44	2492.47
ENSG00000116299.16_KIAA1324	137.49	2.00528	0.241553	8.30161	1.02712e-16	1.57002e-15	46.2311	44.2951	195.007	185.825	216.09
ENSG00000152661.7_GJA1	8656.91	-0.794875	0.0957754	-8.29936	1.04673e-16	1.59868e-15	12181.9	11086.3	7085.25	6883.21	6047.9
ENSG00000120370.12_GORAB	680.386	0.999685	0.120491	8.29673	1.07013e-16	1.63306e-15	431.896	412.286	845.03	897.35	815.368
ENSG00000119938.8_PPP1R3C	583.761	1.10861	0.133672	8.29345	1.10013e-16	1.67745e-15	373.498	308.93	731.065	762.555	742.755
ENSG00000117122.13_MFAP2	1517.91	-1.15263	0.138985	-8.2932	1.10241e-16	1.67953e-15	1912.51	2647.49	990.23	977.264	1062.08
ENSG00000103056.11_SMPD3	283.118	-1.88874	0.227794	-8.29145	1.11873e-16	1.70299e-15	379.581	648.526	117.342	141.535	128.604
ENSG00000162298.16_SYVN1	1796.88	0.786996	0.0949497	8.28856	1.14624e-16	1.74341e-15	1323.67	1172.12	2192.35	2133.61	2162.65
ENSG00000072163.18_LIMS2	498.629	-1.24463	0.150237	-8.2844	1.18708e-16	1.80405e-15	683.733	854.101	292.088	336.025	327.197
ENSG00000125459.14_MSTO1	1381.67	0.881516	0.106423	8.28315	1.19958e-16	1.82153e-15	901.506	924.519	1552.46	1740.78	1789.09
ENSG00000157240.3_FZD1	617.829	-1.37946	0.166552	-8.28244	1.20675e-16	1.83092e-15	802.961	1175.52	368.065	381.277	361.317
ENSG00000139496.15_NUPL1	3693.75	0.668856	0.0807637	8.28164	1.21485e-16	1.84169e-15	2832.26	2613.41	4429.44	4336.55	4257.06
ENSG00000197217.12_ENTPD4	3898.16	-0.775372	0.0936626	-8.27835	1.2489e-16	1.89176e-15	5214.38	5196.16	3279.66	3019.41	2781.18
ENSG00000185404.16_SP140L	734.599	1.23104	0.149113	8.2558	1.50893e-16	2.28374e-15	424.596	375.941	1081.4	969.562	821.492
ENSG00000137331.11_IER3	6597.25	0.807671	0.0978949	8.25038	1.57886e-16	2.38763e-15	4082.93	4979.23	8018.92	7893.21	8011.96
ENSG00000100625.8_SIX4	1168.52	0.934199	0.113283	8.2466	1.62967e-16	2.46243e-15	699.549	801.856	1525.44	1460.6	1355.16
ENSG00000259439.2_RP11-89K21.1	400.941	-1.4501	0.175928	-8.24257	1.68544e-16	2.54461e-15	712.932	596.281	270.984	232.04	192.469
ENSG00000143322.19_ABL2	13387.5	-0.62155	0.0754112	-8.24214	1.69151e-16	2.55168e-15	16964.4	16968.4	10995.5	11551.9	10457.2
ENSG00000134684.10_YARS	4671.71	0.634449	0.0770516	8.23408	1.8095e-16	2.72744e-15	3500.18	3505	5336.94	5326.33	5690.08
ENSG00000105767.2_CADM4	1882.32	-0.976073	0.118653	-8.2263	1.93084e-16	2.90795e-15	2432	2929.16	1226.6	1367.21	1456.64
ENSG00000091651.8_ORC6	1035.78	0.877795	0.106731	8.22434	1.96274e-16	2.95357e-15	721.448	650.798	1313.55	1251.67	1241.42
ENSG00000168958.19_MFF	2371.66	-0.788475	0.095979	-8.21508	2.12024e-16	3.18798e-15	3208.19	3152.91	1896.89	1927.57	1672.73
ENSG00000128346.10_C22orf23	479.622	-1.29064	0.157128	-8.21397	2.13989e-16	3.21491e-15	650.885	848.422	322.479	284.995	291.328
ENSG00000105298.13_CACTIN	1454.7	1.18595	0.144387	8.21371	2.1446e-16	3.21935e-15	817.56	808.67	1633.5	1751.37	2262.38
ENSG00000120949.14_TNFRSF8	58.1893	3.16982	0.386147	8.20884	2.23336e-16	3.34986e-15	4.86643	6.81464	85.2628	93.3937	100.609
ENSG00000172375.12_C2CD2L	792.941	0.942601	0.114854	8.20693	2.26914e-16	3.40076e-15	497.592	516.777	941.267	971.487	1037.58
ENSG00000254726.2_MEX3A	1194.44	-1.05389	0.128457	-8.20425	2.32037e-16	3.47471e-15	1579.16	1905.83	836.588	744.261	906.354
ENSG00000146670.9_CDCA5	1209.48	0.854167	0.104173	8.19952	2.41358e-16	3.61135e-15	834.593	787.091	1410.63	1564.59	1450.52
ENSG00000196693.14_ZNF33B	654.596	-1.10486	0.13475	-8.19928	2.41828e-16	3.61543e-15	989.102	950.642	503.135	429.419	400.685
ENSG00000172716.16_SLFN11	261.269	1.6295	0.198851	8.19455	2.51534e-16	3.75749e-15	98.5452	123.799	389.17	385.129	309.7
ENSG00000085552.16_IGSF9	103.454	-2.38206	0.290729	-8.19341	2.5392e-16	3.79007e-15	153.293	262.364	32.9233	33.6988	34.9943
ENSG00000143110.11_C1orf162	77.6335	2.69325	0.328748	8.19246	2.55948e-16	3.81724e-15	14.5993	13.6293	133.381	114.576	111.982
ENSG00000102287.16_GABRE	476.141	1.26048	0.153938	8.18821	2.65137e-16	3.95108e-15	274.953	235.105	682.102	627.76	560.784
ENSG00000159167.11_STC1	1683.87	1.17257	0.143282	8.18367	2.75328e-16	4.09963e-15	845.542	1050.59	2450.67	2231.82	1840.7
ENSG00000123146.19_ADGRE5	1522.27	0.76181	0.0931413	8.17908	2.86023e-16	4.25543e-15	1063.31	1077.85	1833.57	1750.41	1886.2
ENSG00000198742.9_SMURF1	3434.98	0.673662	0.0823798	8.17751	2.89762e-16	4.30758e-15	2424.7	2625.91	4123	4077.55	3923.74
ENSG00000135655.13_USP15	2291.38	0.782508	0.0957264	8.17443	2.97273e-16	4.41566e-15	1620.52	1568.5	2947.9	2747.89	2572.08
ENSG00000152413.14_HOMER1	866.402	0.980365	0.119982	8.1709	3.06097e-16	4.54307e-15	508.542	576.973	1092.38	1141.91	1012.21
ENSG00000130402.11_ACTN4	53671.2	-0.511712	0.0626653	-8.1658	3.19306e-16	4.73529e-15	65953.5	64910.6	45137.8	46230.9	46123.4
ENSG00000136891.13_TEX10	2321.48	0.778799	0.0953763	8.16554	3.19999e-16	4.74175e-15	1678.92	1558.28	2944.52	2813.37	2612.33
ENSG00000136542.8_GALNT5	203.444	-1.52003	0.186304	-8.15885	3.3822e-16	5.00772e-15	332.134	344.139	109.744	127.092	104.108
ENSG00000143315.6_PIGM	618.461	-1.13034	0.13871	-8.14892	3.67198e-16	5.43213e-15	973.286	873.409	463.458	412.088	370.065
ENSG00000212747.4_FAM127C	794.043	-0.97689	0.119881	-8.14883	3.67475e-16	5.43213e-15	1149.69	1113.06	614.567	576.73	516.167
ENSG00000106723.16_SPIN1	4743.87	-0.734506	0.090169	-8.14588	3.76534e-16	5.56158e-15	6204.7	6293.32	3987.93	3802.18	3431.2
ENSG00000104936.17_DMPK	2568.45	-1.03596	0.127247	-8.14135	3.90887e-16	5.76896e-15	3450.3	4002.46	1550.77	1798.55	2040.17
ENSG00000244607.5_CCDC13	54.2085	3.31882	0.407818	8.13799	4.01878e-16	5.92641e-15	4.86643	3.40732	76.8209	81.8399	104.108
ENSG00000124479.8_NDP	52.559	3.37713	0.415015	8.13736	4.04004e-16	5.95299e-15	3.64982	3.40732	97.0814	89.5424	69.1138
ENSG00000261786.1_RP4-555D20.2	503.621	1.33011	0.163511	8.13472	4.12895e-16	6.07914e-15	287.119	230.562	751.326	658.57	590.53
ENSG00000175155.8_YPEL2	633.668	-0.981707	0.120698	-8.13355	4.16898e-16	6.13316e-15	851.625	956.321	444.886	464.08	451.427
ENSG00000103479.14_RBL2	1353.77	-0.833406	0.102497	-8.13104	4.25615e-16	6.2564e-15	1751.91	1933.09	1073.8	1039.85	970.218
ENSG00000128272.14_ATF4	6056.9	0.706702	0.0869511	8.12758	4.37946e-16	6.43252e-15	4266.64	4493.12	6778.81	7049.78	7696.13
ENSG00000186815.12_TPCN1	2156.94	-0.745624	0.0917843	-8.12366	4.52341e-16	6.63866e-15	2747.1	2956.42	1751.69	1731.15	1598.37
ENSG00000100558.8_PLEK2	104.043	2.35798	0.29048	8.11754	4.75709e-16	6.97606e-15	18.2491	32.9374	151.109	166.568	151.351
ENSG00000106105.13_GARS	7576.67	0.623694	0.0768349	8.11733	4.7656e-16	6.98297e-15	5933.39	5488.05	9028.57	8877.22	8556.12
ENSG00000173805.15_HAP1	61.9221	3.02011	0.372112	8.11613	4.81295e-16	7.04674e-15	4.86643	10.222	98.7698	93.3937	102.358
ENSG00000055163.18_CYFIP2	2760.11	-0.73922	0.0911302	-8.11169	4.99224e-16	7.30343e-15	3794.6	3489.09	2273.39	2197.16	2046.29
ENSG00000214814.6_FER1L6	58.333	3.09362	0.381407	8.11108	5.01698e-16	7.3338e-15	4.86643	7.95041	89.4837	90.5053	98.859
ENSG00000146950.12_SHROOM2	419.023	-1.21137	0.14937	-8.10989	5.06671e-16	7.40061e-15	607.087	673.513	280.27	293.661	240.586
ENSG00000008294.20_SPAG9	5912.11	0.585289	0.0722128	8.10505	5.27218e-16	7.68852e-15	4587.83	4493.12	6793.16	7011.27	6675.17
ENSG00000179094.13_PER1	582.411	1.42832	0.176225	8.10509	5.27076e-16	7.68852e-15	253.054	310.066	676.193	727.893	944.847
ENSG00000135625.7_EGR4	39.2878	3.79305	0.468005	8.10472	5.2868e-16	7.70374e-15	0	0	50.6512	73.1745	72.6133
ENSG00000272886.5_DCP1A	1887.55	0.87906	0.108592	8.09508	5.72245e-16	8.33196e-15	1270.14	1227.77	2527.49	2322.33	2090.04
ENSG00000008311.14_AASS	1036.16	0.894835	0.110607	8.09025	5.95428e-16	8.66266e-15	729.964	630.354	1308.49	1257.45	1254.55
ENSG00000197019.4_SERTAD1	642.953	1.53454	0.189775	8.08608	6.1615e-16	8.95704e-15	276.17	305.523	676.193	869.428	1087.45
ENSG00000168916.15_ZNF608	612.953	-0.960241	0.118779	-8.08429	6.25294e-16	9.08281e-15	851.625	885.903	456.705	450.601	419.932
ENSG00000108352.11_RAPGEFL1	276.88	-1.40407	0.173736	-8.08165	6.3896e-16	9.27398e-15	452.578	440.68	180.656	171.382	139.103
ENSG00000110367.11_DDX6	6880.27	-0.639202	0.0791047	-8.08046	6.45213e-16	9.35736e-15	8820.4	8727.28	5895.79	5652.73	5305.14
ENSG00000233822.4_HIST1H2BN	154.01	1.98424	0.24557	8.08012	6.4701e-16	9.37604e-15	55.9639	46.5667	190.786	219.523	257.208
ENSG00000169914.5_OTUD3	969.375	0.847316	0.10489	8.07811	6.57807e-16	9.525e-15	658.185	646.255	1228.29	1169.83	1144.32
ENSG00000148948.7_LRRC4C	47.5734	3.47828	0.430598	8.0778	6.59444e-16	9.54121e-15	1.21661	3.40732	70.9116	91.4681	70.8635
ENSG00000143384.12_MCL1	8750.34	0.71277	0.0882398	8.07765	6.60286e-16	9.54589e-15	6157.25	6459.14	11131.4	10392.7	9611.2
ENSG00000187244.10_BCAM	742.475	-1.04078	0.128852	-8.07729	6.62204e-16	9.56609e-15	1018.3	1139.18	466.835	523.775	564.284
ENSG00000232810.3_TNF	39.3699	3.78455	0.46855	8.07714	6.63056e-16	9.57089e-15	0	0	75.1326	49.1039	72.6133
ENSG00000135069.13_PSAT1	2831.03	0.66893	0.0828219	8.07673	6.65271e-16	9.59533e-15	2124.2	2048.93	3306.68	3219.68	3455.69
ENSG00000128228.4_SDF2L1	1071.18	1.34515	0.166684	8.07009	7.02462e-16	1.01238e-14	557.206	532.677	1142.18	1375.87	1747.97
ENSG00000180875.4_GREM2	89.8375	-2.33583	0.289644	-8.06448	7.35456e-16	1.0591e-14	145.993	212.39	27.014	27.9218	35.8692
ENSG00000090097.20_PCBP4	3053.59	-1.07929	0.133853	-8.06326	7.42858e-16	1.06809e-14	4151.06	4828.17	1876.63	1926.61	2485.47
ENSG00000166448.14_TMEM130	147.519	-1.67388	0.207593	-8.06328	7.42716e-16	1.06809e-14	259.137	251.006	78.5093	78.9514	69.9887
ENSG00000178252.17_WDR6	4106.92	-0.690411	0.0856478	-8.06105	7.56431e-16	1.08676e-14	5165.71	5493.73	3091.41	3352.55	3431.2
ENSG00000134802.17_SLC43A3	1125.76	1.04298	0.129393	8.06059	7.593e-16	1.09003e-14	653.318	709.858	1589.6	1424.98	1251.05
ENSG00000175105.5_ZNF654	1020.46	0.857326	0.10639	8.05831	7.73545e-16	1.10961e-14	676.434	689.414	1316.93	1221.82	1197.68
ENSG00000145220.13_LYAR	980.156	0.873266	0.108402	8.05582	7.89487e-16	1.1316e-14	681.3	620.132	1246.02	1158.27	1195.06
ENSG00000135373.12_EHF	43.6881	3.61587	0.449144	8.05059	8.2399e-16	1.18013e-14	0	2.27155	87.7953	64.5091	63.8647
ENSG00000103811.15_CTSH	780.156	-1.11635	0.138728	-8.04703	8.48295e-16	1.214e-14	1007.35	1311.82	519.174	549.771	512.667
ENSG00000155660.10_PDIA4	13828.7	0.576197	0.0716507	8.04175	8.85635e-16	1.26645e-14	10443.4	10890.9	15417.4	15928.9	16463.1
ENSG00000198019.12_FCGR1B	62.0356	3.00999	0.374342	8.04075	8.92872e-16	1.27581e-14	6.08304	9.08618	87.7953	94.3565	112.857
ENSG00000181472.4_ZBTB2	1200.49	0.833525	0.103773	8.03222	9.57229e-16	1.36671e-14	765.246	860.916	1436.8	1502.96	1436.52
ENSG00000172828.12_CES3	45.4248	3.53283	0.440029	8.02863	9.85633e-16	1.40617e-14	1.21661	2.27155	60.7814	87.6168	75.2378
ENSG00000182919.14_C11orf54	622.762	-0.954704	0.118926	-8.02768	9.93311e-16	1.41603e-14	903.939	858.644	465.991	458.303	426.931
ENSG00000163513.17_TGFBR2	4183.78	0.742464	0.0925351	8.02358	1.02704e-15	1.46297e-14	2952.71	2989.35	5390.13	4970.09	4616.63
ENSG00000177238.13_TRIM72	49.716	3.64176	0.454017	8.0212	1.04716e-15	1.49048e-14	1.21661	1.13577	59.9372	66.4347	119.856
ENSG00000147852.15_VLDLR	959.707	-1.16776	0.145642	-8.01801	1.07473e-15	1.52854e-14	1315.15	1582.13	714.181	649.905	537.163
ENSG00000243317.7_C7orf73	1560.23	-0.711987	0.0888413	-8.01415	1.10901e-15	1.57608e-14	2039.03	2040.98	1282.32	1213.16	1225.68
ENSG00000177076.5_ACER2	142.946	2.18077	0.272328	8.00786	1.1672e-15	1.6575e-14	53.5307	28.3943	240.593	204.118	188.095
ENSG00000130052.13_STARD8	604.767	0.984971	0.123029	8.00599	1.18509e-15	1.6816e-14	364.982	390.706	759.767	776.997	731.382
ENSG00000079263.18_SP140	268.314	1.43783	0.179601	8.0057	1.18789e-15	1.68428e-14	114.361	143.107	345.272	378.389	360.442
ENSG00000103034.14_NDRG4	644.247	-1.10249	0.137763	-8.00278	1.21638e-15	1.72335e-14	844.325	1063.08	421.249	442.898	449.677
ENSG00000106089.11_STX1A	420.491	1.3902	0.173795	7.99904	1.25394e-15	1.7752e-14	192.224	223.747	533.526	496.816	656.144
ENSG00000205300.3_RP11-352D3.2	49.0237	3.38898	0.423702	7.99851	1.25937e-15	1.78151e-14	4.86643	1.13577	75.1326	71.2488	92.735
ENSG00000124839.12_RAB17	94.3968	-2.22614	0.278331	-7.99818	1.26273e-15	1.78489e-14	152.076	216.933	38.8326	31.7731	32.3698
ENSG00000107796.12_ACTA2	4404.44	-2.32908	0.291466	-7.99092	1.3393e-15	1.89167e-14	6175.5	11379.3	1553.3	1483.71	1430.39
ENSG00000133121.20_STARD13	923.77	0.964483	0.120702	7.99063	1.34251e-15	1.89476e-14	618.036	549.714	1132.9	1243	1075.2
ENSG00000163430.9_FSTL1	27138.3	-0.831211	0.104048	-7.98874	1.36323e-15	1.92252e-14	35573.6	38257.4	22812.4	20864.4	18183.9
ENSG00000116133.11_DHCR24	19845.6	-0.668682	0.083722	-7.98693	1.38337e-15	1.94942e-14	23920.9	27210.8	16020.1	16551.9	15524.4
ENSG00000106538.9_RARRES2	436.691	-1.49534	0.187238	-7.9863	1.39054e-15	1.95803e-14	631.419	812.078	198.384	249.371	292.203
ENSG00000161714.11_PLCD3	3130.3	-0.844706	0.10578	-7.98552	1.39928e-15	1.96883e-14	4135.25	4418.16	2155.21	2306.92	2635.95
ENSG00000154864.11_PIEZO2	467.93	-1.20068	0.150383	-7.98413	1.41514e-15	1.98963e-14	666.701	759.832	342.739	296.549	273.831
ENSG00000069275.12_NUCKS1	13854.7	-0.636135	0.0796765	-7.98398	1.41688e-15	1.99055e-14	18125	17174	11821.1	11511.5	10641.8
ENSG00000181744.8_C3orf58	1768	0.718591	0.0900424	7.98059	1.45639e-15	2.0445e-14	1317.59	1224.36	2137.48	2103.77	2056.79
ENSG00000121417.13_ZNF211	588.4	0.993542	0.124532	7.97817	1.48515e-15	2.08329e-14	346.733	385.027	742.039	729.819	738.381
ENSG00000196975.14_ANXA4	2362.11	-0.749725	0.0939737	-7.97803	1.48688e-15	2.08413e-14	3053.68	3201.74	1965.26	1870.76	1719.1
ENSG00000125726.10_CD70	41.2424	3.57714	0.448592	7.97416	1.53427e-15	2.14891e-14	0	2.27155	63.3139	74.1373	66.4893
ENSG00000183723.12_CMTM4	855.764	-0.877127	0.110007	-7.97336	1.5442e-15	2.16117e-14	1116.85	1245.94	649.179	642.202	624.649
ENSG00000110031.12_LPXN	205.718	1.57062	0.197	7.97268	1.55269e-15	2.17141e-14	81.5127	99.948	273.516	284.032	289.578
ENSG00000122025.14_FLT3	153.698	-1.9183	0.240633	-7.97189	1.56268e-15	2.18372e-14	250.621	312.338	53.1837	68.3604	83.9864
ENSG00000148730.6_EIF4EBP2	5300.78	-0.708282	0.0888506	-7.9716	1.56633e-15	2.18715e-14	6864.1	6979.32	4511.33	4259.52	3889.62
ENSG00000142784.15_WDTC1	1846.47	-0.736654	0.092467	-7.96666	1.63014e-15	2.27453e-14	2307.9	2560.03	1443.56	1490.45	1430.39
ENSG00000062716.10_VMP1	4820.02	-0.73279	0.0921047	-7.95606	1.77608e-15	2.47628e-14	5913.93	6778.29	3983.71	3774.26	3649.91
ENSG00000136274.8_NACAD	313.857	-1.28468	0.161651	-7.94722	1.90736e-15	2.65731e-14	473.26	506.555	173.902	201.23	214.34
ENSG00000278540.4_ACACA	5930.59	-0.724378	0.0911562	-7.94656	1.91764e-15	2.6696e-14	7695.04	7877.72	5000.11	4806.41	4273.68
ENSG00000100664.10_EIF5	9252.59	0.561607	0.0707015	7.94336	1.96781e-15	2.73739e-14	7235.16	7140.6	10776.9	10849.1	10261.2
ENSG00000133321.10_RARRES3	82.8312	2.85399	0.359469	7.93945	2.03081e-15	2.82289e-14	9.73286	14.765	167.993	128.055	93.6099
ENSG00000175130.6_MARCKSL1	4315.78	-0.806422	0.101592	-7.93786	2.05697e-15	2.85709e-14	5353.07	6293.32	3191.02	3186.94	3554.55
ENSG00000213689.9_TREX1	371.616	1.26133	0.159023	7.93176	2.16055e-15	2.99869e-14	177.625	219.204	486.251	464.08	510.917
ENSG00000171819.4_ANGPTL7	51.8533	-2.80667	0.353929	-7.93002	2.19115e-15	3.03888e-14	116.794	107.898	9.28605	8.6654	16.6223
ENSG00000144339.11_TMEFF2	223.769	1.62083	0.204539	7.92432	2.29405e-15	3.1792e-14	90.0289	101.084	289.556	282.107	356.067
ENSG00000196535.14_MYO18A	1888.74	-0.740849	0.0935073	-7.9229	2.32029e-15	3.21313e-14	2402.8	2583.88	1408.95	1494.3	1553.75
ENSG00000233608.3_TWIST2	380.081	1.21285	0.153161	7.91881	2.39793e-15	3.31815e-14	223.856	194.217	465.146	504.519	512.667
ENSG00000141429.13_GALNT1	3118.58	-0.867576	0.109573	-7.91778	2.4179e-15	3.34328e-14	3912.61	4672.57	2513.99	2331.95	2161.78
ENSG00000072952.18_MRVI1	46.9807	-3.07714	0.388822	-7.91401	2.49231e-15	3.44358e-14	74.213	137.429	7.59767	8.6654	6.99887
ENSG00000144567.10_FAM134A	2315.49	-0.653988	0.0826538	-7.91238	2.52522e-15	3.48643e-14	2888.23	3047.28	1842.01	1910.24	1889.69
ENSG00000135930.13_EIF4E2	2065.27	-0.665355	0.0841002	-7.91146	2.5439e-15	3.50959e-14	2595.02	2720.18	1706.94	1664.72	1639.49
ENSG00000104341.16_LAPTM4B	7180.52	-0.758096	0.0958456	-7.90955	2.58315e-15	3.56107e-14	9234.05	9835.79	6052.81	5706.65	5073.31
ENSG00000149582.15_TMEM25	835.459	-0.851026	0.107615	-7.90803	2.615e-15	3.60228e-14	1127.79	1159.62	598.528	642.202	649.145
ENSG00000213462.4_ERV3-1	617.154	-1.2509	0.158238	-7.90515	2.6762e-15	3.68382e-14	883.257	1025.6	444.886	409.199	322.823
ENSG00000164211.12_STARD4	3447.67	0.729169	0.0922414	7.90501	2.67914e-15	3.68512e-14	2407.67	2521.42	4376.26	4124.73	3808.26
ENSG00000196872.10_KIAA1211L	176.372	-1.73433	0.21949	-7.90163	2.75274e-15	3.78353e-14	259.137	360.04	79.3535	91.4681	91.8602
ENSG00000138448.11_ITGAV	12108.4	-0.930064	0.117711	-7.90124	2.76135e-15	3.79253e-14	14817.1	19190	9206.69	9213.24	8115.19
ENSG00000154040.20_CABYR	466.875	1.12631	0.142593	7.89877	2.81662e-15	3.86555e-14	248.188	290.758	568.137	611.392	615.9
ENSG00000156535.13_CD109	1503.29	-0.866635	0.109725	-7.89828	2.82788e-15	3.87812e-14	2189.89	1947.85	1205.5	1139.98	1033.21
ENSG00000136859.9_ANGPTL2	1003.8	-1.04092	0.131796	-7.89792	2.8359e-15	3.88622e-14	1300.55	1617.34	747.105	715.377	638.647
ENSG00000082397.15_EPB41L3	509.366	1.26047	0.159599	7.89773	2.84036e-15	3.88943e-14	306.585	238.512	736.974	657.607	607.152
ENSG00000198440.9_ZNF583	473.333	1.04156	0.131998	7.89071	3.00461e-15	4.11129e-14	288.336	285.079	596.839	608.503	587.905
ENSG00000166289.5_PLEKHF1	275.196	1.59984	0.202879	7.88566	3.12866e-15	4.27784e-14	114.361	123.799	314.037	379.352	444.428
ENSG00000163312.10_HELQ	582.929	0.969992	0.123095	7.88003	3.27292e-15	4.47177e-14	372.282	362.312	722.623	707.674	749.754
ENSG00000135476.11_ESPL1	996.68	0.843121	0.107043	7.87645	3.36824e-15	4.59519e-14	709.282	634.897	1235.04	1188.12	1216.05
ENSG00000177675.8_CD163L1	60.3093	2.911	0.36958	7.87652	3.36613e-15	4.59519e-14	6.08304	10.222	101.302	88.5796	95.3596
ENSG00000008300.14_CELSR3	346.418	1.47134	0.186817	7.87588	3.38363e-15	4.61277e-14	143.56	181.724	395.923	492.965	517.916
ENSG00000262576.2_PCDHGA4	228.439	-1.54224	0.196017	-7.86787	3.60721e-15	4.91392e-14	346.733	417.964	136.758	135.758	104.983
ENSG00000135636.13_DYSF	2700.9	-0.708094	0.0900081	-7.867	3.63241e-15	4.94459e-14	3445.43	3607.21	2129.88	2290.55	2031.42
ENSG00000137449.15_CPEB2	2187.32	0.708379	0.0901301	7.85952	3.85611e-15	5.24135e-14	1659.45	1501.49	2662.56	2570.73	2542.34
ENSG00000272196.2_HIST2H2AA4	34.8643	3.69303	0.469879	7.85953	3.8559e-15	5.24135e-14	0	0	54.8721	62.5834	56.8658
ENSG00000166471.10_TMEM41B	2330.4	0.640599	0.0815098	7.85917	3.86695e-15	5.2522e-14	1777.46	1705.93	2742.76	2728.64	2697.19
ENSG00000007545.15_CRAMP1L	1684.03	0.748603	0.0952669	7.85795	3.90456e-15	5.29937e-14	1178.89	1205.06	1964.42	1936.23	2135.53
ENSG00000105656.12_ELL	942.41	1.02289	0.130187	7.85708	3.93202e-15	5.33271e-14	553.556	599.688	1083.09	1138.06	1337.66
ENSG00000105499.13_PLA2G4C	394.244	1.33387	0.169897	7.85102	4.12679e-15	5.59274e-14	182.491	220.34	491.316	595.024	482.047
ENSG00000273301.1_RP11-314B1.2	29.5741	-3.58682	0.456888	-7.85055	4.14215e-15	5.60943e-14	62.047	80.6399	4.22093	0.962822	0
ENSG00000168268.10_NT5DC2	5118.58	-0.747169	0.0951778	-7.85024	4.1523e-15	5.61904e-14	6373.81	7170.13	3718.64	4088.14	4242.19
ENSG00000115758.12_ODC1	15958.7	0.632863	0.0806539	7.84664	4.27326e-15	5.77847e-14	12671	11273.7	18064.7	18875.2	18909.2
ENSG00000121104.7_FAM117A	370.177	1.27194	0.162106	7.84637	4.28244e-15	5.78239e-14	183.708	208.982	440.665	489.114	528.415
ENSG00000197780.9_TAF13	2001.45	0.75803	0.0966082	7.84643	4.28045e-15	5.78239e-14	1451.41	1368.61	2309.69	2309.81	2567.71
ENSG00000164331.9_ANKRA2	589.281	0.946735	0.120697	7.84389	4.36797e-15	5.89355e-14	374.715	377.077	738.663	729.819	726.133
ENSG00000145050.15_MANF	3762.83	0.817792	0.104289	7.84159	4.44882e-15	5.99824e-14	2630.3	2510.06	4305.35	4266.26	5102.18
ENSG00000100823.11_APEX1	5493.34	-0.5786	0.0737963	-7.84049	4.48791e-15	6.04653e-14	7083.09	6635.19	4566.2	4574.37	4607.88
ENSG00000172349.16_IL16	49.6685	3.36567	0.429329	7.83936	4.52844e-15	6.09666e-14	0	5.67886	66.6907	77.9886	97.9842
ENSG00000102024.17_PLS3	11920.4	-0.560295	0.0714769	-7.83883	4.54753e-15	6.11789e-14	14762.3	14812.7	10240.8	10209.8	9576.2
ENSG00000139668.8_WDFY2	1041.89	0.997068	0.127213	7.83777	4.58632e-15	6.16557e-14	684.95	608.774	1418.23	1338.32	1159.19
ENSG00000134762.16_DSC3	3561.64	-0.684092	0.0872971	-7.83637	4.63775e-15	6.23015e-14	4578.09	4647.58	3004.46	2920.24	2657.82
ENSG00000144229.11_THSD7B	52.2887	3.17427	0.405208	7.83367	4.73815e-15	6.36039e-14	2.43321	6.81464	71.7558	88.5796	91.8602
ENSG00000122035.6_RASL11A	56.0702	3.02085	0.385804	7.83001	4.87834e-15	6.5438e-14	7.29964	5.67886	80.1977	85.6911	101.484
ENSG00000180739.13_S1PR5	70.5645	-2.37201	0.303143	-7.82473	5.08763e-15	6.81958e-14	139.91	144.243	27.014	25.0334	16.6223
ENSG00000115365.11_LANCL1	1696.01	-0.839786	0.10736	-7.82213	5.19383e-15	6.95686e-14	2324.94	2303.35	1429.21	1207.38	1215.18
ENSG00000101079.20_NDRG3	1347.23	-0.728595	0.0931894	-7.81844	5.34838e-15	7.15866e-14	1792.06	1751.36	1091.53	1022.52	1078.7
ENSG00000148680.15_HTR7	130.429	1.86561	0.238708	7.81547	5.47578e-15	7.32385e-14	47.4477	46.5667	181.5	186.787	189.844
ENSG00000134755.14_DSC2	304.497	-1.31603	0.168399	-7.81494	5.49882e-15	7.34933e-14	440.412	519.048	203.449	191.602	167.973
ENSG00000171860.4_C3AR1	51.4818	3.37087	0.431349	7.81473	5.50825e-15	7.35659e-14	3.64982	2.27155	108.056	85.6911	57.7407
ENSG00000138685.12_FGF2	17948.5	-0.696841	0.0892061	-7.81158	5.6475e-15	7.5371e-14	24080.3	22615.5	15330.4	14583.9	13132.5
ENSG00000189410.11_SH2D5	1203.1	0.949297	0.121549	7.80998	5.71976e-15	7.62801e-14	796.878	735.981	1346.48	1481.78	1654.36
ENSG00000100336.17_APOL4	35.8844	3.68009	0.471243	7.80932	5.74956e-15	7.6622e-14	0	0	59.093	72.2116	48.1172
ENSG00000063438.16_AHRR	1079.94	-0.805087	0.103126	-7.80685	5.86349e-15	7.80837e-14	1405.18	1508.31	833.212	789.514	863.485
ENSG00000171320.14_ESCO2	805.101	1.08184	0.138598	7.80564	5.92014e-15	7.87811e-14	487.86	465.667	1100.82	1092.8	878.358
ENSG00000114541.14_FRMD4B	463.229	-1.52324	0.195174	-7.80452	5.97273e-15	7.94235e-14	632.636	910.89	287.023	278.256	207.341
ENSG00000138071.13_ACTR2	20307.1	-0.503842	0.0645614	-7.80408	5.99381e-15	7.96463e-14	24641.2	24736	17707.6	17355.8	17094.7
ENSG00000086061.15_DNAJA1	12119.5	0.551818	0.0707554	7.79895	6.24234e-15	8.28888e-14	9547.93	9371.26	14419.5	13733.7	13525.3
ENSG00000138411.10_HECW2	339.092	1.2272	0.157422	7.79559	6.41091e-15	8.5066e-14	198.307	171.502	459.237	434.233	432.18
ENSG00000204261.8_PSMB8-AS1	105.12	2.14697	0.275601	7.79014	6.69342e-15	8.87505e-14	31.6318	29.5301	171.37	153.089	139.977
ENSG00000167107.12_ACSF2	1604.41	-0.670221	0.0860956	-7.78462	6.99249e-15	9.26492e-14	2082.83	2053.48	1297.51	1306.55	1281.67
ENSG00000169896.16_ITGAM	34.2909	3.66164	0.471044	7.77346	7.63705e-15	1.01117e-13	0	0	56.5605	51.0296	63.8647
ENSG00000109321.10_AREG	47.3249	3.32482	0.427798	7.77195	7.7287e-15	1.02257e-13	2.43321	3.40732	59.093	88.5796	83.1116
ENSG00000170871.11_KIAA0232	1734.18	-0.730888	0.0940586	-7.77056	7.81425e-15	1.03314e-13	2191.11	2372.63	1406.41	1398.98	1301.79
ENSG00000179119.14_SPTY2D1	1729.84	0.809794	0.104269	7.76639	8.07524e-15	1.06688e-13	1115.63	1256.16	2078.39	2227.97	1971.06
ENSG00000173846.12_PLK3	1638.52	0.969626	0.124906	7.76287	8.30256e-15	1.09613e-13	919.755	1143.72	1850.46	2103.77	2174.9
ENSG00000172613.7_RAD9A	393.844	1.46913	0.189374	7.75779	8.64195e-15	1.14012e-13	192.224	178.316	450.795	498.742	649.145
ENSG00000113083.12_LOX	25924.6	0.702039	0.0905177	7.75582	8.77747e-15	1.15717e-13	19322.2	18251.9	33554.7	29938.9	28555.4
ENSG00000142871.15_CYR61	15958.8	-0.639529	0.0824747	-7.75425	8.88677e-15	1.17074e-13	20470.6	20240.6	13985.6	12870	12227
ENSG00000204482.10_LST1	33.9297	3.65272	0.471189	7.75214	9.03588e-15	1.18953e-13	0	0	58.2488	60.6578	50.7418
ENSG00000176945.16_MUC20	122.241	2.04955	0.26443	7.75082	9.13046e-15	1.20112e-13	46.2311	30.6659	162.928	177.159	194.219
ENSG00000105708.8_ZNF14	304.714	1.29417	0.167068	7.74636	9.45658e-15	1.24313e-13	175.191	144.243	412.807	388.017	403.31
ENSG00000118733.16_OLFM3	33.8585	3.65029	0.471266	7.7457	9.50593e-15	1.24873e-13	0	0	60.7814	57.7693	50.7418
ENSG00000205835.8_GMNC	51.5014	3.07875	0.39785	7.73849	1.00605e-14	1.32064e-13	4.86643	5.67886	92.8605	77.9886	76.1127
ENSG00000100600.14_LGMN	2195.86	0.885998	0.114543	7.73508	1.03335e-14	1.3555e-13	1356.52	1536.7	3001.93	2608.28	2475.85
ENSG00000148143.12_ZNF462	2286.08	0.786825	0.101755	7.73253	1.05432e-14	1.38203e-13	1542.66	1629.83	2860.1	2900.98	2496.85
ENSG00000148180.16_GSN	3432.13	-0.85038	0.110018	-7.72947	1.07996e-14	1.41463e-13	4181.48	5215.47	2468.4	2602.51	2692.81
ENSG00000009307.15_CSDE1	24658.9	-0.516577	0.0668605	-7.72619	1.10816e-14	1.45053e-13	29969.9	30264.9	21570.6	21090.6	20398.2
ENSG00000179195.15_ZNF664	4644.99	-0.624388	0.080844	-7.72337	1.13294e-14	1.48192e-13	5918.79	5868.54	3964.3	3881.14	3592.17
ENSG00000008405.11_CRY1	1853.12	0.757801	0.0981483	7.72097	1.15444e-14	1.50897e-13	1301.77	1308.41	2085.98	2384.91	2184.52
ENSG00000173575.18_CHD2	3224	-0.80643	0.10446	-7.71997	1.16359e-14	1.51985e-13	4592.69	4109.23	2619.51	2575.55	2223.02
ENSG00000133794.17_ARNTL	556.671	1.0077	0.130552	7.71872	1.17505e-14	1.53373e-13	335.784	350.954	738.663	700.934	657.019
ENSG00000155893.11_PXYLP1	243.039	-1.28257	0.166195	-7.71728	1.18835e-14	1.54999e-13	379.581	379.348	157.863	154.052	144.352
ENSG00000157551.17_KCNJ15	60.8734	2.94967	0.382262	7.71634	1.19717e-14	1.56039e-13	7.29964	7.95041	119.874	90.5053	78.7373
ENSG00000135318.11_NT5E	17530.9	0.829386	0.107506	7.71481	1.21161e-14	1.5781e-13	11916.7	11882.5	23904	21356.4	18595.1
ENSG00000156983.15_BRPF1	1029.43	0.895949	0.116154	7.71348	1.22436e-14	1.59358e-13	641.152	707.586	1162.44	1302.7	1333.28
ENSG00000170006.11_TMEM154	645.554	1.19972	0.155596	7.71045	1.25376e-14	1.63068e-13	318.751	395.249	883.019	909.867	720.884
ENSG00000196405.12_EVL	777.097	-0.826156	0.107152	-7.71011	1.25709e-14	1.63387e-13	1054.8	1056.27	604.437	596.95	573.032
ENSG00000151835.13_SACS	8793.38	-0.680819	0.0883429	-7.70656	1.29259e-14	1.67882e-13	11078.4	11674.6	7378.19	7361.74	6473.95
ENSG00000165806.19_CASP7	743.576	1.0753	0.13964	7.70052	1.35517e-14	1.75886e-13	468.394	415.693	1070.43	886.759	876.608
ENSG00000073849.14_ST6GAL1	727.895	-0.990792	0.128796	-7.69272	1.44045e-14	1.86822e-13	980.585	1103.97	571.514	479.485	503.919
ENSG00000130787.13_HIP1R	1363.16	1.11228	0.144612	7.69148	1.4544e-14	1.88499e-13	722.665	863.187	1479.01	1747.52	2003.43
ENSG00000185088.12_RPS27L	4431.94	-0.747585	0.0972274	-7.68904	1.48243e-14	1.91997e-13	6287.43	5443.76	3358.17	3358.32	3712.03
ENSG00000189325.6_C6orf222	33.7176	3.62961	0.472148	7.68745	1.50101e-14	1.94266e-13	0	0	48.9628	64.5091	55.1161
ENSG00000204516.9_MICB	1587.28	0.751022	0.0977531	7.68285	1.55589e-14	2.01227e-13	1098.6	1144.86	1934.87	1978.6	1779.46
ENSG00000143476.17_DTL	948.757	0.895137	0.116519	7.68233	1.56222e-14	2.01904e-13	663.051	581.516	1237.58	1150.57	1111.07
ENSG00000149547.14_EI24	4390.29	-0.679563	0.0885387	-7.67532	1.65003e-14	2.13103e-13	5905.41	5450.57	3732.99	3544.15	3318.34
ENSG00000166741.7_NNMT	386.67	-1.41008	0.183744	-7.67417	1.66489e-14	2.14872e-13	518.275	732.573	209.358	218.561	254.584
ENSG00000197712.11_FAM114A1	3684.93	-0.764943	0.0997367	-7.66962	1.72506e-14	2.22481e-13	4988.09	4822.49	3134.46	2886.54	2593.08
ENSG00000106462.10_EZH2	1774.05	0.694271	0.0905495	7.66731	1.75641e-14	2.26366e-13	1309.07	1272.07	2129.04	2155.76	2004.3
ENSG00000186594.12_MIR22HG	1238.16	-0.717636	0.0936016	-7.66692	1.76176e-14	2.26896e-13	1633.9	1610.53	1007.11	983.041	956.22
ENSG00000167244.17_IGF2	95.795	2.36038	0.308491	7.65137	1.98854e-14	2.55924e-13	31.6318	14.765	157.019	133.832	141.727
ENSG00000168542.12_COL3A1	214.52	-3.46333	0.452987	-7.64554	2.08078e-14	2.67607e-13	270.087	747.339	22.793	19.2564	13.1229
ENSG00000150510.15_FAM124A	238.152	-1.29702	0.16967	-7.64438	2.09951e-14	2.69827e-13	383.231	363.447	139.291	156.94	147.851
ENSG00000133985.2_TTC9	422.414	-1.05419	0.137954	-7.6416	2.14546e-14	2.75541e-13	581.538	651.934	303.063	285.958	289.578
ENSG00000115993.11_TRAK2	2544.4	-0.744079	0.0974968	-7.63183	2.31439e-14	2.9703e-13	3206.98	3519.76	2135.79	1996.89	1862.57
ENSG00000152242.10_C18orf25	2062.56	0.661654	0.0867447	7.62759	2.39175e-14	3.06744e-13	1536.57	1513.99	2521.58	2372.39	2368.24
ENSG00000154529.14_CNTNAP3B	372.545	1.11585	0.146328	7.62571	2.427e-14	3.11048e-13	221.423	211.254	487.939	477.56	464.55
ENSG00000174460.3_ZCCHC12	55.0756	2.86061	0.375156	7.62513	2.43781e-14	3.12216e-13	7.29964	7.95041	86.9512	85.6911	87.4859
ENSG00000196743.8_GM2A	1210.99	-0.802452	0.105455	-7.60943	2.75311e-14	3.52353e-13	1614.44	1650.28	1003.74	919.495	866.985
ENSG00000165195.13_PIGA	422.534	1.16701	0.153392	7.60803	2.78312e-14	3.55946e-13	253.054	223.747	600.216	515.11	520.541
ENSG00000006715.15_VPS41	2911.03	-0.76996	0.101238	-7.60545	2.83915e-14	3.6286e-13	3781.22	3982.02	2459.96	2284.78	2047.17
ENSG00000257151.1_PWAR6	472.811	-1.07481	0.141325	-7.60522	2.84419e-14	3.63251e-13	761.596	628.082	325.856	328.322	320.198
ENSG00000179833.4_SERTAD2	2937.48	0.765375	0.100649	7.60442	2.8618e-14	3.65246e-13	2125.41	1996.69	3791.24	3572.07	3201.98
ENSG00000185483.11_ROR1	692.429	-0.949429	0.124884	-7.6025	2.9047e-14	3.70464e-13	1014.65	942.691	525.928	525.701	453.177
ENSG00000198899.2_MT-ATP6	137839	-0.900174	0.118441	-7.60019	2.9569e-14	3.76861e-13	204391	179195	112531	106821	86258.4
ENSG00000173545.4_ZNF622	2095.26	0.792462	0.104327	7.59595	3.05544e-14	3.89151e-13	1541.44	1358.38	2427.88	2423.42	2725.18
ENSG00000129675.15_ARHGEF6	367.402	-1.26643	0.166751	-7.59472	3.08459e-14	3.92592e-13	618.036	524.727	264.23	225.3	204.717
ENSG00000125746.14_EML2	561.281	0.976375	0.128602	7.59222	3.14472e-14	3.99968e-13	366.199	338.46	729.377	667.236	705.136
ENSG00000034152.18_MAP2K3	4178.35	0.766187	0.100971	7.58819	3.24398e-14	4.12308e-13	2918.64	2941.65	4594.06	4877.66	5559.73
ENSG00000104881.14_PPP1R13L	459.622	1.14589	0.151113	7.58297	3.37721e-14	4.28946e-13	228.722	295.301	608.658	585.396	580.031
ENSG00000119899.12_SLC17A5	1092.8	-0.837455	0.110449	-7.5823	3.39477e-14	4.30879e-13	1468.44	1511.71	896.525	827.064	760.252
ENSG00000270276.2_HIST2H4B	257.529	1.62875	0.215003	7.57549	3.57774e-14	4.53789e-13	99.7618	118.12	363	285.958	420.807
ENSG00000047932.13_GOPC	3926.47	-0.62421	0.082447	-7.57104	3.70252e-14	4.69292e-13	5002.69	4961.06	3314.27	3325.59	3028.76
ENSG00000176903.4_PNMA1	2054.74	-0.685992	0.0906104	-7.57078	3.70987e-14	4.699e-13	2691.14	2636.13	1675.71	1547.25	1723.47
ENSG00000131871.14_VIMP	1546.43	0.784067	0.103588	7.56911	3.75775e-14	4.75638e-13	1077.91	1071.03	1726.36	1853.43	2003.43
ENSG00000173320.9_STOX2	598.353	-1.00045	0.132199	-7.56773	3.79802e-14	4.80404e-13	913.672	805.263	449.107	436.158	387.562
ENSG00000111886.10_GABRR2	86.1351	2.24154	0.296356	7.56368	3.91833e-14	4.95281e-13	23.1155	22.7155	134.226	119.39	131.229
ENSG00000113269.13_RNF130	909.923	-0.802158	0.106063	-7.56305	3.93713e-14	4.97316e-13	1226.34	1226.63	737.819	691.306	667.517
ENSG00000134532.15_SOX5	161.794	1.7046	0.225395	7.56273	3.947e-14	4.97879e-13	55.9639	73.8252	243.126	224.338	211.716
ENSG00000134716.9_CYP2J2	131.261	2.21312	0.292633	7.5628	3.94491e-14	4.97879e-13	35.2816	36.3447	254.944	181.011	148.726
ENSG00000145604.15_SKP2	1328.18	-1.05013	0.138868	-7.56208	3.96679e-14	5.00032e-13	2008.62	1866.07	1090.69	882.908	792.622
ENSG00000205659.10_LIN52	495.985	1.08383	0.143334	7.56161	3.98123e-14	5.01509e-13	317.534	269.178	670.284	630.648	592.279
ENSG00000172345.13_STARD5	288.058	1.35784	0.179621	7.55949	4.04653e-14	5.09386e-13	137.477	152.194	402.677	411.125	336.821
ENSG00000132481.6_TRIM47	636.611	-0.918615	0.121532	-7.55865	4.07264e-14	5.12323e-13	837.026	944.963	481.186	464.08	455.801
ENSG00000088280.18_ASAP3	446.073	-1.38038	0.18264	-7.55794	4.09506e-14	5.14792e-13	573.022	858.644	250.723	281.144	266.832
ENSG00000231672.6_DIRC3	102.421	2.10728	0.278821	7.55783	4.09859e-14	5.14883e-13	25.5488	35.209	136.758	158.866	155.725
ENSG00000132326.11_PER2	150.404	1.84566	0.244317	7.55436	4.20928e-14	5.28429e-13	55.9639	53.3813	176.435	229.152	237.087
ENSG00000224032.6_EPB41L4A-AS1	559.896	1.02677	0.135936	7.55333	4.24282e-14	5.32276e-13	328.484	354.361	650.867	760.629	705.136
ENSG00000130254.11_SAFB2	3268.5	0.795543	0.105328	7.55301	4.25318e-14	5.33212e-13	2245.86	2269.27	3654.48	3753.08	4419.79
ENSG00000198551.9_ZNF627	787.35	0.825063	0.109244	7.55247	4.27094e-14	5.35074e-13	530.441	540.628	964.06	934.9	966.719
ENSG00000168917.8_SLC35G2	380.284	1.16402	0.154129	7.55226	4.27773e-14	5.3556e-13	206.823	222.611	510.733	447.712	513.542
ENSG00000141543.9_EIF4A3	2946.18	0.600466	0.0795533	7.54798	4.42077e-14	5.53092e-13	2313.99	2177.28	3400.38	3404.54	3434.69
ENSG00000229474.6_PATL2	44.5683	3.16929	0.420273	7.54103	4.66258e-14	5.8295e-13	3.64982	3.40732	62.4698	78.9514	74.363
ENSG00000070831.15_CDC42	10129.6	-0.572185	0.0758819	-7.54047	4.68285e-14	5.85086e-13	12972.7	12268.6	8862.26	8265.83	8278.79
ENSG00000183287.13_CCBE1	1044.58	1.02968	0.13656	7.54009	4.69633e-14	5.86372e-13	722.665	550.85	1422.45	1258.41	1268.55
ENSG00000164329.13_PAPD4	2042.81	0.728212	0.0965965	7.5387	4.74695e-14	5.92291e-13	1452.63	1468.55	2577.3	2461.94	2253.64
ENSG00000134954.14_ETS1	5699.31	0.638097	0.0846472	7.53832	4.76077e-14	5.93613e-13	4400.47	4127.4	6946.81	6775.38	6246.49
ENSG00000116863.10_ADPRHL2	1092.45	0.762276	0.101129	7.53764	4.78567e-14	5.96314e-13	743.347	791.634	1289.92	1289.22	1348.16
ENSG00000163931.15_TKT	12246	-0.616924	0.0818499	-7.53726	4.79961e-14	5.97646e-13	15571.4	15426.1	9470.08	9984.46	10778.3
ENSG00000087253.11_LPCAT2	2961.24	-0.739072	0.0980876	-7.53482	4.88995e-14	6.08483e-13	3761.75	4053.57	2341.77	2510.08	2139.03
ENSG00000090530.9_P3H2	1084.47	0.966778	0.128381	7.53054	5.05312e-14	6.28362e-13	609.52	757.56	1433.43	1377.8	1244.05
ENSG00000198727.2_MT-CYB	104714	-0.685935	0.0911081	-7.52881	5.12067e-14	6.36332e-13	129318	142134	88545.8	86973.6	76597.4
ENSG00000165632.7_TAF3	771.353	0.848335	0.112696	7.52762	5.16716e-14	6.41676e-13	503.675	532.677	969.97	939.714	910.728
ENSG00000063660.8_GPC1	6804.18	-0.981241	0.13036	-7.52719	5.18438e-14	6.43381e-13	8825.27	10603.6	4252.16	4662.95	5676.96
ENSG00000196878.12_LAMB3	133.872	1.9067	0.25354	7.52031	5.46463e-14	6.77703e-13	52.3141	40.8878	190.786	167.531	217.84
ENSG00000138002.14_IFT172	610.33	-0.873912	0.116256	-7.51714	5.59867e-14	6.93858e-13	833.376	850.694	454.172	469.857	443.553
ENSG00000017797.11_RALBP1	3534.54	-0.589856	0.0784692	-7.51704	5.60317e-14	6.93949e-13	4408.98	4453.37	3038.23	2947.2	2824.92
ENSG00000139613.11_SMARCC2	3148.4	-0.624564	0.0831002	-7.51579	5.65679e-14	7.00118e-13	4003.85	3986.56	2646.52	2665.09	2439.98
ENSG00000121101.15_TEX14	55.8225	3.03414	0.403811	7.51375	5.74556e-14	7.10627e-13	1.21661	10.222	105.523	79.9142	82.2367
ENSG00000169359.13_SLC33A1	2187.6	0.657439	0.0875395	7.5102	5.90365e-14	7.29689e-13	1587.67	1653.69	2458.27	2582.29	2656.07
ENSG00000117228.9_GBP1	3844.18	1.12298	0.149593	7.50687	6.05587e-14	7.48001e-13	2090.13	2353.32	6024.96	4725.53	4026.97
ENSG00000083857.13_FAT1	20186.2	-0.746233	0.0994491	-7.50367	6.20557e-14	7.65978e-13	27143.7	26267	16654.1	16934.1	13932.1
ENSG00000137200.12_CMTR1	2320.08	0.737954	0.0983529	7.50313	6.23135e-14	7.68644e-13	1579.16	1721.83	2979.13	2684.35	2635.95
ENSG00000083799.17_CYLD	4612.86	0.541084	0.0721177	7.50279	6.24734e-14	7.70101e-13	3590.21	3646.97	5272.79	5353.29	5201.03
ENSG00000067836.12_ROGDI	368.115	-1.12025	0.149484	-7.4941	6.67565e-14	8.22347e-13	549.906	547.443	254.944	221.449	266.832
ENSG00000144560.13_VGLL4	2120.25	-0.75846	0.101269	-7.48954	6.91137e-14	8.50816e-13	2610.84	3022.29	1732.27	1577.1	1658.73
ENSG00000205683.11_DPF3	482.649	1.10274	0.147412	7.48069	7.39306e-14	9.09505e-13	313.885	251.006	644.958	589.247	614.151
ENSG00000039600.10_SOX30	41.4273	3.19747	0.427435	7.48058	7.39939e-14	9.09675e-13	3.64982	2.27155	68.3791	65.4719	67.3641
ENSG00000153071.14_DAB2	10862.1	-0.861075	0.115113	-7.48024	7.41878e-14	9.10884e-13	15381.6	14470.9	9170.39	8323.6	6963.87
ENSG00000163485.15_ADORA1	251.864	-1.294	0.172989	-7.48023	7.41912e-14	9.10884e-13	389.314	399.792	142.667	176.196	151.351
ENSG00000198879.11_SFMBT2	252.238	1.39013	0.185892	7.47814	7.53807e-14	9.24871e-13	139.91	109.034	338.519	355.281	318.449
ENSG00000108312.14_UBTF	2958.08	-0.631831	0.0845493	-7.47293	7.84288e-14	9.61628e-13	3668.07	3858.22	2476	2489.86	2298.25
ENSG00000119772.16_DNMT3A	1097.64	-0.745936	0.0998736	-7.4688	8.09274e-14	9.91603e-13	1393.02	1510.58	845.03	875.205	864.36
ENSG00000162591.15_MEGF6	981.185	-1.3576	0.181774	-7.46861	8.10478e-14	9.92417e-13	1259.19	1871.75	497.226	579.619	698.137
ENSG00000152056.16_AP1S3	811.672	-0.799518	0.107086	-7.4661	8.26085e-14	1.01086e-12	1056.02	1130.09	628.074	614.28	629.898
ENSG00000239521.7_GATS	299.069	-1.14363	0.153202	-7.4649	8.33637e-14	1.01942e-12	451.361	446.359	209.358	189.676	198.593
ENSG00000107186.16_MPDZ	2198.55	-0.68334	0.0915463	-7.46442	8.36643e-14	1.02242e-12	2831.05	2863.28	1839.48	1816.84	1642.11
ENSG00000141738.13_GRB7	281.748	-1.37388	0.184136	-7.46125	8.57049e-14	1.04666e-12	391.748	511.098	150.265	177.159	178.471
ENSG00000143256.4_PFDN2	1948.97	0.833856	0.111805	7.45816	8.77396e-14	1.07031e-12	1453.85	1185.75	2327.42	2281.89	2495.97
ENSG00000147604.13_RPL7	25008.2	-0.509121	0.0682639	-7.45813	8.77577e-14	1.07031e-12	31370.2	29558.5	21498	21015.5	21598.5
ENSG00000276045.1_ORAI1	847.303	1.02602	0.137574	7.45798	8.78615e-14	1.07086e-12	503.675	530.406	971.658	1004.22	1226.55
ENSG00000145901.14_TNIP1	7864.54	0.598201	0.0802146	7.4575	8.81763e-14	1.07399e-12	5789.83	6210.41	9542.68	9049.56	8730.21
ENSG00000073584.18_SMARCE1	4755.76	-0.605048	0.0811707	-7.45402	9.05416e-14	1.10207e-12	6140.22	5848.09	4006.51	4064.07	3719.9
ENSG00000189184.11_PCDH18	289.959	-1.68639	0.226289	-7.45238	9.16685e-14	1.11505e-12	639.935	369.126	137.602	157.903	145.227
ENSG00000198105.11_ZNF248	390.634	-1.06202	0.142526	-7.4514	9.23572e-14	1.12268e-12	585.188	558.8	289.556	267.664	251.959
ENSG00000080802.18_CNOT4	1572.92	0.734791	0.0986151	7.4511	9.25628e-14	1.12444e-12	1178.89	1063.08	1913.77	1918.9	1789.96
ENSG00000162654.8_GBP4	37.8243	3.48225	0.467529	7.44821	9.46155e-14	1.14862e-12	1.21661	0	87.7953	51.9924	48.1172
ENSG00000144455.13_SUMF1	1050.64	-0.96947	0.130223	-7.44466	9.71908e-14	1.1791e-12	1326.1	1662.77	703.207	751.001	810.119
ENSG00000105011.8_ASF1B	776.007	0.891895	0.11983	7.44299	9.84296e-14	1.19335e-12	535.307	483.839	995.295	971.487	894.106
ENSG00000166446.14_CDYL2	1003.01	0.79781	0.107298	7.43546	1.04201e-13	1.26249e-12	686.166	697.365	1236.73	1257.45	1137.32
ENSG00000138347.15_MYPN	113.565	2.1252	0.285993	7.43096	1.07813e-13	1.30539e-12	45.0145	21.5797	162.928	169.457	168.848
ENSG00000164292.12_RHOBTB3	4557.11	-0.704099	0.0947662	-7.42986	1.08717e-13	1.31546e-12	5892.03	5995.74	3938.13	3650.06	3309.59
ENSG00000124181.14_PLCG1	3327.86	-0.644406	0.0867914	-7.42477	1.12975e-13	1.36609e-12	4090.23	4413.61	2606	2857.66	2671.82
ENSG00000185305.10_ARL15	421.775	-1.13188	0.152509	-7.42172	1.15608e-13	1.39702e-12	598.571	662.156	267.607	321.583	258.958
ENSG00000113578.17_FGF1	744.773	0.843499	0.113724	7.4171	1.1971e-13	1.44563e-12	496.376	506.555	876.265	943.565	901.104
ENSG00000115183.13_TANC1	2513.65	-0.754448	0.101737	-7.41567	1.21011e-13	1.46039e-12	3215.49	3453.89	2095.27	2026.74	1776.84
ENSG00000108604.15_SMARCD2	1599.81	-0.676666	0.0912746	-7.41352	1.2299e-13	1.4833e-12	1996.45	2137.52	1310.18	1305.59	1249.3
ENSG00000117020.16_AKT3	2640.95	-0.700067	0.0944506	-7.41199	1.24422e-13	1.49929e-12	3545.19	3334.63	2199.95	2183.68	1941.31
ENSG00000179387.9_ELMOD2	951.846	-0.801347	0.108116	-7.41192	1.24479e-13	1.49929e-12	1243.37	1322.04	774.963	725.968	692.888
ENSG00000156232.7_WHAMM	1164.44	0.800109	0.107959	7.41125	1.25117e-13	1.50599e-12	776.195	827.978	1471.42	1441.34	1305.29
ENSG00000102218.5_RP2	1832.67	0.707376	0.0954624	7.40999	1.26308e-13	1.51933e-12	1371.12	1277.74	2298.72	2114.36	2101.41
ENSG00000177565.15_TBL1XR1	4779.07	-0.791365	0.1068	-7.40981	1.26484e-13	1.52045e-12	6533.18	6304.68	3976.12	3871.51	3209.86
ENSG00000060138.12_YBX3	5412.56	0.603396	0.0814528	7.40793	1.28284e-13	1.54109e-12	4322.61	3916.14	6459.71	6147.62	6216.75
ENSG00000105711.10_SCN1B	519.717	-1.0936	0.147744	-7.40197	1.34183e-13	1.61089e-12	733.614	802.991	325.012	329.285	407.684
ENSG00000016864.16_GLT8D1	1346.36	-0.732947	0.0990609	-7.39895	1.37262e-13	1.64679e-12	1779.9	1767.26	1136.27	1028.29	1020.09
ENSG00000099968.17_BCL2L13	2904.17	0.662593	0.0895546	7.39876	1.37461e-13	1.6481e-12	2046.33	2245.42	3557.4	3409.35	3262.35
ENSG00000174099.10_MSRB3	2942.5	-0.733002	0.0991065	-7.39611	1.40234e-13	1.68025e-12	3548.84	4202.36	2401.71	2277.07	2282.51
ENSG00000068305.17_MEF2A	8045.89	-0.875981	0.118452	-7.39523	1.41169e-13	1.69035e-12	11696.5	10525.2	6604.91	6319.96	5082.93
ENSG00000122970.15_IFT81	776.363	-1.00027	0.135263	-7.39506	1.41346e-13	1.69138e-12	1148.48	1082.39	623.853	545.92	481.172
ENSG00000160712.12_IL6R	341.486	-1.12452	0.15215	-7.3909	1.45834e-13	1.74394e-12	530.441	488.382	212.735	248.408	227.463
ENSG00000169085.11_C8orf46	227.716	1.41226	0.191147	7.38833	1.48682e-13	1.77684e-12	116.794	104.491	300.53	335.062	281.704
ENSG00000171310.10_CHST11	828.383	1.11671	0.151149	7.38812	1.48916e-13	1.77848e-12	392.964	566.751	1055.23	1084.14	1042.83
ENSG00000116171.16_SCP2	2460.24	-0.581212	0.0786883	-7.38626	1.51019e-13	1.80243e-12	3040.3	3109.75	2035.33	2045.03	2070.79
ENSG00000145780.7_FEM1C	1479.07	0.773632	0.104792	7.38253	1.55315e-13	1.8525e-12	1102.25	964.271	1804.87	1838.99	1684.98
ENSG00000253873.5_PCDHGA11	583.34	-1.08903	0.147533	-7.3816	1.56401e-13	1.86425e-12	787.145	934.741	417.028	431.344	346.444
ENSG00000166501.12_PRKCB	72.3634	-2.31585	0.313784	-7.38039	1.57823e-13	1.87998e-12	135.043	154.465	16.0395	31.7731	24.496
ENSG00000134160.13_TRPM1	30.1223	3.50723	0.475345	7.37827	1.60355e-13	1.90891e-12	0	0	52.3395	51.0296	47.2424
ENSG00000162924.13_REL	764.808	1.13885	0.154371	7.37738	1.61439e-13	1.92057e-12	484.21	391.842	1105.04	1001.33	841.614
ENSG00000164983.7_TMEM65	1509.38	-0.662578	0.0898536	-7.37397	1.65615e-13	1.96898e-12	1927.11	1954.67	1188.61	1214.12	1262.42
ENSG00000100767.15_PAPLN	124.808	-1.63253	0.221547	-7.36875	1.72232e-13	2.04633e-12	211.69	216.933	66.6907	68.3604	60.3652
ENSG00000115946.7_PNO1	1131.11	0.730377	0.0991463	7.36666	1.74955e-13	2.07733e-12	812.694	802.991	1393.75	1308.47	1337.66
ENSG00000114302.15_PRKAR2A	2547.79	-0.709505	0.0963548	-7.36347	1.79197e-13	2.12633e-12	3466.11	3192.66	2116.37	2095.1	1868.7
ENSG00000172927.7_MYEOV	93.913	2.18731	0.297135	7.36136	1.82052e-13	2.15882e-12	27.982	23.8512	115.653	155.977	146.101
ENSG00000101474.11_APMAP	4597.38	-0.542944	0.0737568	-7.36127	1.8217e-13	2.15882e-12	5519.75	5817.43	3859.62	3920.61	3869.5
ENSG00000141580.15_WDR45B	2974.73	0.600223	0.0815719	7.35821	1.86389e-13	2.20741e-12	2249.51	2285.17	3510.13	3300.55	3528.3
ENSG00000144730.16_IL17RD	474.875	-0.994231	0.135184	-7.35464	1.91438e-13	2.26574e-12	652.101	709.858	333.453	316.768	362.191
ENSG00000163913.11_IFT122	741.733	-0.794327	0.108026	-7.35309	1.93675e-13	2.29074e-12	990.318	1004.02	565.605	584.433	564.284
ENSG00000175213.2_ZNF408	675.607	1.20277	0.163668	7.34885	1.99919e-13	2.36308e-12	378.365	366.855	742.884	835.729	1054.2
ENSG00000140092.14_FBLN5	1189.8	-1.24885	0.169986	-7.34681	2.02992e-13	2.39786e-12	1537.79	2145.47	885.551	752.927	627.274
ENSG00000011132.11_APBA3	619.199	1.21218	0.165072	7.34333	2.08342e-13	2.45948e-12	323.618	355.497	736.974	710.563	969.343
ENSG00000213676.10_ATF6B	2353.39	-0.586904	0.0800544	-7.33131	2.2792e-13	2.68887e-12	2922.29	2972.32	1936.56	1998.82	1936.94
ENSG00000077264.14_PAK3	499.726	1.12143	0.153101	7.32478	2.39293e-13	2.82123e-12	260.354	316.881	660.998	686.492	573.907
ENSG00000142634.12_EFHD2	1949.77	0.93999	0.128406	7.32044	2.47161e-13	2.91214e-12	1226.34	1267.52	2179.69	2243.38	2831.92
ENSG00000204371.11_EHMT2	2029.18	-0.642859	0.0879116	-7.31256	2.62099e-13	3.08616e-12	2504.99	2678.15	1620.84	1627.17	1714.72
ENSG00000162909.17_CAPN2	18820.4	-0.494984	0.0676952	-7.31195	2.63287e-13	3.09816e-12	22920.9	22699.6	15700.2	16138.8	16642.4
ENSG00000168575.9_SLC20A2	3695.33	-0.683041	0.0934186	-7.31161	2.63959e-13	3.1041e-12	4464.95	5105.3	2979.98	3094.51	2831.92
ENSG00000079385.21_CEACAM1	63.7297	2.63164	0.36008	7.3085	2.70149e-13	3.17485e-12	15.8159	6.81464	110.588	95.3194	90.1104
ENSG00000178567.7_EPM2AIP1	1518.35	-0.893861	0.122393	-7.3032	2.81001e-13	3.30028e-12	2180.16	2038.71	1289.92	1061.99	1020.96
ENSG00000133065.10_SLC41A1	1877.55	0.647552	0.0887007	7.30042	2.86878e-13	3.36715e-12	1413.7	1382.24	2287.74	2171.16	2132.91
ENSG00000163374.19_YY1AP1	2131.89	0.669489	0.0917157	7.29961	2.88604e-13	3.38526e-12	1554.82	1584.4	2446.45	2667.02	2406.74
ENSG00000010030.13_ETV7	127.021	2.3643	0.324193	7.29289	3.03377e-13	3.55627e-12	21.8989	37.4805	267.607	164.643	143.477
ENSG00000204923.3_FBXO48	140.864	1.69896	0.233009	7.29139	3.06785e-13	3.59393e-12	63.2636	49.974	187.409	205.081	198.593
ENSG00000196517.11_SLC6A9	207.182	1.47523	0.202454	7.28675	3.17517e-13	3.71729e-12	83.9459	109.034	282.802	260.925	299.202
ENSG00000170091.10_HMP19	38.3584	3.28016	0.450344	7.28367	3.24856e-13	3.8008e-12	0	3.40732	50.6512	61.6206	76.1127
ENSG00000182580.2_EPHB3	87.6009	2.21922	0.304784	7.2813	3.30629e-13	3.86588e-12	17.0325	29.5301	119.03	137.684	134.728
ENSG00000168314.17_MOBP	30.4116	3.47401	0.47716	7.28059	3.32373e-13	3.88381e-12	0	0	55.7163	39.4757	56.8658
ENSG00000130396.20_MLLT4	6562.01	-0.723822	0.0995298	-7.27242	3.53115e-13	4.12356e-12	8653.73	8580.76	5676.31	5269.52	4629.75
ENSG00000165507.8_C10orf10	246.771	-1.23816	0.170274	-7.27159	3.55285e-13	4.14627e-12	405.13	356.633	148.577	160.791	162.724
ENSG00000116396.13_KCNC4	158.193	-1.4819	0.20382	-7.27064	3.57785e-13	4.1728e-12	240.888	281.672	90.3279	91.4681	86.611
ENSG00000151617.15_EDNRA	438.114	-1.04541	0.143821	-7.2688	3.627e-13	4.22744e-12	591.271	684.871	287.867	327.359	299.202
ENSG00000178996.12_SNX18	1007.23	-0.762362	0.1049	-7.26754	3.66083e-13	4.26417e-12	1322.45	1357.25	807.042	814.547	734.881
ENSG00000109861.15_CTSC	7281.47	0.769483	0.106028	7.25733	3.94796e-13	4.59571e-12	5660.87	4531.73	9167.02	8553.71	8494
ENSG00000153885.14_KCTD15	604.407	-0.856714	0.118086	-7.255	4.01662e-13	4.67268e-12	798.094	860.916	454.172	448.675	460.176
ENSG00000092148.12_HECTD1	6983	-0.667493	0.0920234	-7.25351	4.06099e-13	4.72132e-12	8985.86	9004.41	5925.34	5905.95	5093.43
ENSG00000108106.13_UBE2S	4845.52	1.00839	0.139031	7.25301	4.07622e-13	4.73603e-12	2940.54	3027.97	5049.92	5866.47	7342.69
ENSG00000108669.16_CYTH1	902.946	0.785962	0.108389	7.25133	4.12703e-13	4.79204e-12	621.686	631.49	1143.87	1059.1	1058.58
ENSG00000168653.10_NDUFS5	4663.25	-0.558853	0.0771057	-7.24788	4.2335e-13	4.91257e-12	6010.04	5556.2	3875.66	3933.13	3941.24
ENSG00000167550.10_RHEBL1	47.1923	2.87287	0.396472	7.24609	4.28961e-13	4.97454e-12	6.08304	5.67886	69.2232	77.9886	76.9876
ENSG00000101224.17_CDC25B	2486.2	-0.606714	0.0837402	-7.24519	4.31822e-13	5.00456e-12	3194.81	3076.81	2117.22	2071.99	1970.18
ENSG00000100201.18_DDX17	16927.2	-0.913419	0.126109	-7.24312	4.38485e-13	5.07859e-12	24180.1	23145.9	14397.6	12617.8	10294.5
ENSG00000159208.15_CIART	113.9	1.88646	0.260522	7.24105	4.45222e-13	5.15013e-12	35.2816	44.2951	175.591	165.605	148.726
ENSG00000166295.8_ANAPC16	1306.13	-0.661649	0.0913741	-7.2411	4.45058e-13	5.15013e-12	1709.33	1649.14	1065.36	1055.25	1051.58
ENSG00000121073.13_SLC35B1	1904.05	0.614716	0.0849039	7.24014	4.48238e-13	5.18176e-12	1453.85	1427.67	2167.87	2244.34	2226.52
ENSG00000163814.7_CDCP1	6131.12	0.876597	0.121085	7.23953	4.50258e-13	5.20185e-12	3837.18	4275.05	8523.75	7584.15	6435.46
ENSG00000188021.8_UBQLN2	2102.7	-0.670873	0.0927157	-7.23581	4.62754e-13	5.34286e-12	2614.49	2808.77	1757.6	1736.93	1595.74
ENSG00000117984.12_CTSD	18932.7	-0.790034	0.109197	-7.23495	4.65702e-13	5.37353e-12	23088.8	27753.7	13244.4	14651.3	15925.1
ENSG00000151929.9_BAG3	3863.58	0.581344	0.0803679	7.23353	4.70588e-13	5.4265e-12	2941.76	3001.85	4318.01	4382.77	4673.49
ENSG00000104763.17_ASAH1	2935.07	-0.645949	0.0893408	-7.23016	4.8241e-13	5.55934e-12	3623.06	3882.07	2444.76	2484.08	2241.39
ENSG00000196781.13_TLE1	3270.04	-0.544767	0.0753886	-7.22612	4.96971e-13	5.72357e-12	4050.09	4019.5	2723.34	2817.22	2740.06
ENSG00000081177.18_EXD2	640.262	-0.824657	0.11418	-7.22244	5.10646e-13	5.87738e-12	860.141	879.088	499.758	488.151	474.173
ENSG00000137177.18_KIF13A	4243.66	-0.636678	0.0881771	-7.22045	5.18175e-13	5.9603e-12	5506.36	5310.87	3611.43	3589.4	3200.23
ENSG00000101187.15_SLCO4A1	291.012	1.19677	0.16577	7.21943	5.22071e-13	6.00137e-12	161.809	160.144	402.677	372.612	357.817
ENSG00000185989.10_RASA3	1978.73	0.639538	0.0886031	7.21801	5.27541e-13	6.06046e-12	1414.91	1542.38	2280.15	2338.69	2317.5
ENSG00000148516.21_ZEB1	2494.25	0.79603	0.110301	7.21692	5.31784e-13	6.10539e-12	1790.85	1652.55	3191.87	3177.31	2658.7
ENSG00000161203.13_AP2M1	16853.3	-0.516489	0.0715934	-7.21419	5.42544e-13	6.2214e-12	20207.8	20963	13766.1	14698.4	14631.1
ENSG00000198040.10_ZNF84	1218.57	-0.795381	0.110252	-7.21419	5.42564e-13	6.2214e-12	1631.47	1646.87	1009.65	958.008	846.863
ENSG00000128045.6_RASL11B	48.4114	2.88608	0.400144	7.2126	5.48922e-13	6.29039e-12	4.86643	6.81464	70.0674	69.3232	90.9853
ENSG00000006756.15_ARSD	1345.14	-0.663869	0.092071	-7.2104	5.5787e-13	6.38894e-12	1711.77	1749.09	1071.27	1123.61	1069.95
ENSG00000083099.10_LYRM2	1458.35	-0.672104	0.093247	-7.20778	5.68717e-13	6.50912e-12	1928.32	1835.41	1225.76	1154.42	1147.81
ENSG00000144891.17_AGTR1	61.7767	2.60034	0.360776	7.20763	5.69357e-13	6.5124e-12	9.73286	12.4935	105.523	77.0258	104.108
ENSG00000158555.14_GDPD5	546.433	-0.967487	0.134237	-7.20728	5.70805e-13	6.5249e-12	706.849	847.287	396.767	383.203	398.061
ENSG00000129250.11_KIF1C	11027	-0.707227	0.0981321	-7.20689	5.72457e-13	6.53567e-12	13882.7	14916.1	7942.1	8761.68	9632.19
ENSG00000197580.11_BCO2	221.416	-1.28424	0.178195	-7.20689	5.72433e-13	6.53567e-12	340.65	352.09	148.577	141.535	124.23
ENSG00000166986.12_MARS	5393.45	0.517016	0.0717464	7.20616	5.75538e-13	6.56677e-12	4264.21	4295.49	5983.59	6215.98	6208
ENSG00000118508.4_RAB32	2579.79	-0.605282	0.0840016	-7.2056	5.77902e-13	6.58966e-12	3287.27	3216.51	2054.75	2233.75	2106.66
ENSG00000118473.21_SGIP1	794.356	1.03318	0.143406	7.20457	5.8226e-13	6.63524e-12	509.758	455.445	1113.48	1033.11	859.986
ENSG00000057704.10_TMCC3	259.395	1.34323	0.186763	7.19214	6.37849e-13	7.26422e-12	143.56	119.256	354.558	371.649	307.95
ENSG00000107262.16_BAG1	1068.56	0.747533	0.103949	7.19135	6.41548e-13	7.29732e-12	768.896	743.931	1280.63	1216.04	1333.28
ENSG00000170743.16_SYT9	97.6054	2.00587	0.278926	7.19142	6.41205e-13	7.29732e-12	26.7654	35.209	141.823	152.126	132.104
ENSG00000150337.13_FCGR1A	63.7616	2.49319	0.346792	7.1893	6.51239e-13	7.40296e-12	13.3827	12.4935	108.9	99.1707	84.8613
ENSG00000075415.12_SLC25A3	13125.2	-0.519991	0.0723305	-7.18909	6.52232e-13	7.40967e-12	16573.8	15531.7	11369.5	10852	11298.8
ENSG00000105290.11_APLP1	3294.25	-0.92253	0.128339	-7.18824	6.56311e-13	7.45141e-12	3932.07	5305.2	2304.63	2350.25	2579.08
ENSG00000158623.14_COPG2	961.898	-0.898555	0.125013	-7.18771	6.58894e-13	7.47613e-12	1341.92	1334.53	755.546	761.592	615.9
ENSG00000154229.11_PRKCA	3837.07	-0.728199	0.101341	-7.1856	6.69124e-13	7.58753e-12	5541.65	4552.18	3087.19	3028.07	2976.27
ENSG00000164694.16_FNDC1	281.116	-1.59248	0.221626	-7.18543	6.69948e-13	7.59219e-12	396.614	559.936	176.435	158.866	113.732
ENSG00000053254.15_FOXN3	1651.65	-0.825202	0.114885	-7.18288	6.82591e-13	7.73071e-12	2099.86	2387.39	1349.01	1296.92	1125.07
ENSG00000170364.12_SETMAR	342.47	-1.02786	0.143123	-7.18162	6.88903e-13	7.7974e-12	498.809	494.061	246.502	235.891	237.087
ENSG00000004776.11_HSPB6	3106.16	-0.921332	0.128346	-7.17852	7.04709e-13	7.9714e-12	4293.41	4413.61	2562.1	2386.84	1874.82
ENSG00000101871.14_MID1	2125.11	-0.778057	0.108404	-7.17737	7.10656e-13	8.03373e-12	2928.37	2756.52	1815	1644.5	1481.14
ENSG00000111247.14_RAD51AP1	638.59	0.893075	0.124431	7.17726	7.11201e-13	8.03495e-12	439.195	398.656	827.302	769.295	758.502
ENSG00000111057.10_KRT18	24772.3	-0.801031	0.111625	-7.17608	7.17377e-13	8.09292e-12	28950.4	37821.2	18632.9	18825.1	19631.8
ENSG00000116016.13_EPAS1	7223.77	-0.513628	0.0715754	-7.17604	7.17577e-13	8.09292e-12	8741.32	8887.42	5951.51	6254.49	6284.11
ENSG00000187522.13_HSPA14	1652.99	0.708969	0.0987969	7.17603	7.17651e-13	8.09292e-12	1253.11	1133.5	2019.29	2001.71	1857.32
ENSG00000183779.6_ZNF703	1664.51	0.974784	0.135855	7.17516	7.22207e-13	8.13932e-12	979.369	1108.51	1818.38	1992.08	2424.23
ENSG00000139291.13_TMEM19	637.445	-0.841105	0.117268	-7.17251	7.36353e-13	8.29366e-12	865.008	875.681	455.86	501.63	489.046
ENSG00000170275.14_CRTAP	7619.1	-0.585121	0.081666	-7.16481	7.78923e-13	8.76776e-12	9366.66	9707.45	6664.85	6416.25	5940.29
ENSG00000116663.10_FBXO6	282.709	1.3059	0.182304	7.16329	7.87646e-13	8.85752e-12	131.394	161.28	399.3	333.136	388.437
ENSG00000237440.8_ZNF737	226.132	-1.22868	0.171526	-7.16325	7.87859e-13	8.85752e-12	345.516	350.954	153.642	140.572	139.977
ENSG00000162783.10_IER5	2480.19	1.03139	0.144	7.16243	7.9258e-13	8.90515e-12	1377.2	1637.78	2725.88	2908.68	3751.39
ENSG00000112972.14_HMGCS1	5708.45	-0.652814	0.0911468	-7.16223	7.9377e-13	8.91308e-12	7186.5	7446.13	4784.85	4902.69	4222.07
ENSG00000257743.8_MGAM2	51.3772	2.7446	0.383273	7.16096	8.01112e-13	8.99004e-12	6.08304	9.08618	90.3279	77.0258	74.363
ENSG00000166920.10_C15orf48	55.0146	2.7931	0.390115	7.15969	8.08577e-13	9.06828e-12	7.29964	7.95041	109.744	81.8399	68.239
ENSG00000070087.13_PFN2	6487.35	-0.681637	0.0952174	-7.15875	8.14187e-13	9.12563e-12	8949.36	7847.05	5472.01	5332.11	4836.22
ENSG00000174226.8_SNX31	30.5862	3.4299	0.479259	7.15668	8.26541e-13	9.25847e-12	0	0	41.3651	43.327	68.239
ENSG00000003096.13_KLHL13	312.633	-1.21951	0.170487	-7.15312	8.4828e-13	9.49619e-12	525.574	435.001	224.553	192.564	185.47
ENSG00000160310.16_PRMT2	2664.09	-0.567122	0.0792892	-7.15257	8.51675e-13	9.52841e-12	3352.97	3274.43	2200.79	2201.01	2291.25
ENSG00000121895.7_TMEM156	180.71	1.48595	0.207787	7.15135	8.59293e-13	9.60779e-12	88.8123	78.3683	251.567	259.962	224.839
ENSG00000134594.4_RAB33A	316.772	-1.08921	0.152336	-7.15006	8.67398e-13	9.6892e-12	442.845	492.925	224.553	211.821	211.716
ENSG00000157978.11_LDLRAP1	458.812	-0.961526	0.13448	-7.14994	8.68153e-13	9.6892e-12	650.885	651.934	352.87	332.174	306.201
ENSG00000163660.11_CCNL1	4181.05	0.606268	0.0847931	7.14997	8.67938e-13	9.6892e-12	3165.61	3188.11	5148.69	4815.07	4587.76
ENSG00000151136.14_BTBD11	183.251	1.51498	0.211895	7.14967	8.69837e-13	9.70211e-12	70.5632	95.4049	241.437	245.52	263.332
ENSG00000166206.13_GABRB3	177.198	-1.65844	0.232085	-7.14585	8.94418e-13	9.97024e-12	274.953	338.46	108.056	96.2822	68.239
ENSG00000111011.17_RSRC2	3638.66	0.548933	0.0768369	7.14414	9.05633e-13	1.00892e-11	2758.05	2928.02	4169.43	4160.35	4177.45
ENSG00000130956.13_HABP4	2318.99	-0.717729	0.100495	-7.14191	9.20431e-13	1.02478e-11	3096.27	2982.54	1736.49	1755.22	2024.42
ENSG00000100968.13_NFATC4	1318.21	-0.807581	0.11308	-7.14166	9.22089e-13	1.02601e-11	1618.09	1942.17	1003.74	1053.33	973.718
ENSG00000123358.19_NR4A1	343.091	1.40257	0.196504	7.13761	9.49682e-13	1.05607e-11	139.91	194.217	386.637	478.522	516.167
ENSG00000040341.17_STAU2	1878.58	-0.778957	0.109139	-7.13731	9.5175e-13	1.05773e-11	2562.17	2464.63	1572.72	1502.96	1290.42
ENSG00000004487.15_KDM1A	3920.99	-0.535317	0.075014	-7.13623	9.59255e-13	1.06543e-11	4784.92	4858.84	3381.81	3356.4	3222.98
ENSG00000153786.12_ZDHHC7	3553.79	-0.604784	0.0847685	-7.13454	9.71146e-13	1.07798e-11	4705.84	4253.47	3011.21	2938.53	2859.91
ENSG00000004399.12_PLXND1	3899.76	-0.803321	0.112607	-7.13387	9.75871e-13	1.08258e-11	4609.72	5909.43	2957.18	3082.96	2939.52
ENSG00000132359.13_RAP1GAP2	598.718	0.85897	0.120488	7.12908	1.01044e-12	1.12025e-11	411.213	388.434	726	736.559	731.382
ENSG00000267426.5_RP11-552F3.12	87.6204	2.20522	0.309348	7.12861	1.01388e-12	1.12339e-11	21.8989	24.987	135.07	151.163	104.983
ENSG00000187240.13_DYNC2H1	1832.69	-0.696677	0.0977842	-7.12464	1.04356e-12	1.15558e-11	2503.78	2265.87	1498.43	1518.37	1377.03
ENSG00000011243.17_AKAP8L	1976.2	0.866902	0.121742	7.12079	1.07307e-12	1.18753e-11	1253.11	1374.29	2133.26	2391.65	2728.68
ENSG00000114854.7_TNNC1	270.292	-1.36625	0.191929	-7.11854	1.09073e-12	1.20635e-11	364.982	500.876	173.902	146.349	165.348
ENSG00000173706.12_HEG1	6658.05	-1.01398	0.14251	-7.11514	1.11799e-12	1.23576e-11	8510.17	10709.2	5368.18	4850.7	3852
ENSG00000112640.14_PPP2R5D	1473.16	-0.682781	0.0959679	-7.11468	1.12169e-12	1.23911e-11	1929.54	1886.52	1255.3	1165.01	1129.44
ENSG00000164176.12_EDIL3	5359.19	-0.892561	0.125464	-7.11406	1.12681e-12	1.24402e-11	6508.85	8376.32	4296.06	4078.51	3536.18
ENSG00000176022.4_B3GALT6	922.002	-0.740904	0.10423	-7.10838	1.17411e-12	1.29546e-11	1209.31	1226.63	709.116	703.823	761.127
ENSG00000114770.16_ABCC5	1689.93	-0.678337	0.0954545	-7.10639	1.19114e-12	1.31347e-11	2242.21	2128.44	1420.76	1383.58	1274.67
ENSG00000156140.8_ADAMTS3	527.177	-1.15414	0.162423	-7.10574	1.19683e-12	1.31895e-11	734.831	852.965	366.377	394.757	286.954
ENSG00000112078.13_KCTD20	2388.48	-0.97694	0.137497	-7.10519	1.20158e-12	1.32339e-11	3067.07	3748.05	1933.19	1752.34	1441.77
ENSG00000137642.12_SORL1	872.798	-0.985236	0.138722	-7.10224	1.22752e-12	1.35115e-11	1335.83	1160.76	613.723	708.637	545.037
ENSG00000182325.10_FBXL6	586.392	1.40305	0.197561	7.10185	1.23099e-12	1.35417e-11	274.953	296.437	601.905	758.704	999.963
ENSG00000186265.9_BTLA	30.4988	3.32902	0.468829	7.1007	1.24124e-12	1.36463e-11	0	1.13577	43.8977	55.8437	51.6167
ENSG00000143344.15_RGL1	900.104	-0.72725	0.102445	-7.09896	1.25699e-12	1.38111e-11	1178.89	1188.02	720.091	725.005	688.514
ENSG00000186318.16_BACE1	2809.79	-0.586727	0.0826588	-7.09817	1.26415e-12	1.38815e-11	3486.8	3551.56	2423.66	2356.03	2230.89
ENSG00000204580.11_DDR1	1758.07	-0.945603	0.13325	-7.09648	1.27978e-12	1.40447e-11	2166.78	2799.68	1149.78	1279.59	1394.52
ENSG00000197332.8_ZNF833P	81.574	2.15135	0.303356	7.09182	1.32364e-12	1.45174e-11	20.6823	24.987	109.744	120.353	132.104
ENSG00000116117.17_PARD3B	802.225	-1.01042	0.142495	-7.09089	1.33248e-12	1.46057e-11	1102.25	1210.73	616.256	609.466	472.424
ENSG00000197894.10_ADH5	4900.49	-0.558873	0.0788201	-7.09049	1.3364e-12	1.464e-11	6136.57	6018.46	4256.39	4188.28	3902.74
ENSG00000170099.5_SERPINA6	29.8749	3.40236	0.479986	7.08845	1.3562e-12	1.4848e-11	0	0	40.5209	42.3642	66.4893
ENSG00000156671.12_SAMD8	2113.22	0.651111	0.0919079	7.08438	1.39666e-12	1.52819e-11	1594.97	1545.79	2607.69	2478.3	2339.37
ENSG00000104432.12_IL7	102.206	1.96948	0.278036	7.08355	1.40512e-12	1.53653e-11	26.7654	39.752	158.707	150.2	135.603
ENSG00000151748.14_SAV1	1688.44	0.63296	0.0893722	7.08229	1.41792e-12	1.54961e-11	1229.99	1301.6	1927.28	1983.41	1999.93
ENSG00000131558.14_EXOC4	2391.06	-0.648028	0.0915078	-7.08167	1.42427e-12	1.55562e-11	3054.9	3064.32	2024.36	2010.37	1801.33
ENSG00000173786.16_CNP	5207.72	0.550279	0.0777347	7.07894	1.45262e-12	1.58565e-11	3906.53	4226.21	6061.26	5830.85	6013.78
ENSG00000096093.14_EFHC1	762.369	-0.99055	0.139931	-7.07885	1.45356e-12	1.58573e-11	1194.71	990.394	591.774	555.548	479.423
ENSG00000232040.2_ZBED9	164.788	1.52569	0.215623	7.07573	1.4866e-12	1.62081e-11	81.5127	67.0106	223.709	213.746	237.962
ENSG00000111961.16_SASH1	1011.24	0.72916	0.103091	7.07301	1.51614e-12	1.65204e-11	736.047	708.722	1220.69	1232.41	1158.31
ENSG00000215193.12_PEX26	2487.1	-0.566234	0.0800965	-7.0694	1.55601e-12	1.69448e-11	3037.87	3147.23	2126.5	2066.22	2057.67
ENSG00000123191.13_ATP7B	531.276	-0.89289	0.126413	-7.06329	1.62607e-12	1.76973e-11	711.715	764.375	401.833	371.649	406.809
ENSG00000128512.19_DOCK4	658.253	1.01988	0.144436	7.06112	1.65171e-12	1.79658e-11	346.733	457.716	827.302	870.391	789.122
ENSG00000139874.5_SSTR1	170.223	1.47028	0.208435	7.05391	1.73954e-12	1.89099e-11	83.9459	74.961	233.84	238.78	219.59
ENSG00000162687.16_KCNT2	829.693	-0.923596	0.130939	-7.05365	1.74279e-12	1.89341e-11	1081.56	1245.94	648.335	635.462	537.163
ENSG00000080854.14_IGSF9B	142.517	-1.61496	0.229185	-7.04656	1.8339e-12	1.99121e-11	238.455	249.87	65.0023	67.3975	91.8602
ENSG00000093167.17_LRRFIP2	3181.56	0.569816	0.0809286	7.04097	1.90907e-12	2.07161e-11	2509.86	2412.38	3692.47	3526.82	3766.27
ENSG00000116191.17_RALGPS2	792.09	-0.885871	0.125917	-7.03534	1.98783e-12	2.1558e-11	1132.66	1063.08	640.737	600.801	523.165
ENSG00000123496.7_IL13RA2	91.9049	2.04283	0.290414	7.03419	2.00415e-12	2.17223e-11	27.982	28.3943	146.044	142.498	114.606
ENSG00000135679.21_MDM2	6484.83	-0.550007	0.0782837	-7.02581	2.12821e-12	2.30533e-11	7889.7	8144.63	5712.61	5482.31	5194.91
ENSG00000270607.1_RP11-359E10.1	290.222	1.12867	0.160742	7.02166	2.19251e-12	2.37359e-11	166.675	166.959	370.598	380.315	366.566
ENSG00000184939.15_ZFP90	1070.06	-0.680682	0.0969417	-7.02156	2.19407e-12	2.37388e-11	1361.38	1408.36	876.265	853.06	851.237
ENSG00000140943.16_MBTPS1	5054.59	-0.571503	0.0814026	-7.02069	2.2077e-12	2.38722e-11	6311.76	6281.96	4367.82	4350.03	3961.36
ENSG00000154822.15_PLCL2	198.666	1.34429	0.191479	7.02053	2.21024e-12	2.38856e-11	96.112	104.491	260.853	267.664	264.207
ENSG00000108852.14_MPP2	421.777	-0.995054	0.141744	-7.0201	2.21712e-12	2.39459e-11	559.639	650.798	310.66	295.586	292.203
ENSG00000133142.17_TCEAL4	2038.53	-0.619027	0.0881937	-7.01895	2.23548e-12	2.41301e-11	2685.05	2480.53	1718.76	1632.95	1675.35
ENSG00000108679.12_LGALS3BP	16878.2	0.778398	0.110923	7.01746	2.25937e-12	2.43737e-11	10352.1	13154.5	21574.9	20180.7	19128.8
ENSG00000127993.14_RBM48	510.033	0.930469	0.132631	7.01548	2.29169e-12	2.47078e-11	345.516	310.066	654.244	629.686	610.651
ENSG00000134363.11_FST	2804.94	0.789416	0.112533	7.01496	2.30023e-12	2.47854e-11	2150.96	1734.33	3604.67	3308.26	3226.48
ENSG00000213281.4_NRAS	4204.71	-0.647423	0.0923225	-7.01262	2.33898e-12	2.51882e-11	5507.58	5251.81	3639.29	3490.23	3134.62
ENSG00000161091.12_MFSD12	2528.42	0.931443	0.132831	7.01226	2.34491e-12	2.52314e-11	1453.85	1792.25	2822.96	2971.27	3601.79
ENSG00000205853.10_RFPL3S	66.0746	2.35219	0.335442	7.01222	2.34574e-12	2.52314e-11	14.5993	15.9008	105.523	87.6168	106.733
ENSG00000113657.12_DPYSL3	7298.56	-1.82961	0.260926	-7.01198	2.34965e-12	2.52588e-11	9822.89	16561.8	3567.53	3362.17	3178.36
ENSG00000100271.16_TTLL1	266.806	-1.15653	0.164969	-7.01056	2.37369e-12	2.55023e-11	378.365	425.915	170.526	187.75	171.472
ENSG00000145284.11_SCD5	2385.22	-0.627143	0.0895622	-7.00232	2.51757e-12	2.70323e-11	3147.36	2913.26	1994.81	2014.22	1856.45
ENSG00000257335.8_MGAM	85.3777	2.26041	0.322831	7.00183	2.52642e-12	2.71115e-11	12.1661	30.6659	122.407	134.795	126.855
ENSG00000198355.4_PIM3	1374.02	1.02603	0.14655	7.00125	2.53687e-12	2.72078e-11	789.578	884.767	1496.74	1629.09	2069.92
ENSG00000141905.17_NFIC	4954.6	-0.499419	0.0713482	-6.99974	2.56443e-12	2.74713e-11	5927.31	6102.51	4269.89	4283.59	4189.7
ENSG00000157600.11_TMEM164	1044.97	-0.740409	0.105776	-6.99979	2.56352e-12	2.74713e-11	1451.41	1309.55	855.16	812.622	796.121
ENSG00000168939.10_SPRY3	227.595	-1.22083	0.174477	-6.99707	2.61377e-12	2.79673e-11	340.65	358.904	155.33	149.237	133.853
ENSGR0000168939.10_SPRY3	227.595	-1.22083	0.174477	-6.99707	2.61377e-12	2.79673e-11	340.65	358.904	155.33	149.237	133.853
ENSG00000122643.18_NT5C3A	827.295	0.980842	0.140227	6.99469	2.65849e-12	2.84293e-11	559.639	474.753	1157.38	1023.48	921.226
ENSG00000007341.18_ST7L	672.338	0.811969	0.116101	6.99361	2.67894e-12	2.86314e-11	465.961	454.309	838.277	808.77	794.372
ENSG00000152804.10_HHEX	242.127	1.26613	0.181086	6.99188	2.71232e-12	2.89713e-11	139.91	116.985	330.077	305.215	318.449
ENSG00000164284.14_GRPEL2	1104.47	0.762262	0.109047	6.99023	2.74432e-12	2.92961e-11	799.311	751.882	1350.7	1391.28	1229.18
ENSG00000198721.12_ECI2	2432.56	0.611541	0.0875138	6.98794	2.78953e-12	2.97614e-11	1906.42	1780.89	2918.35	2710.34	2846.79
ENSG00000164136.16_IL15	277.263	1.31951	0.188835	6.98764	2.79541e-12	2.98069e-11	167.892	116.985	363.844	355.281	382.313
ENSG00000196890.4_HIST3H2BB	64.2093	2.47533	0.354262	6.98729	2.80249e-12	2.98651e-11	17.0325	9.08618	113.965	84.7283	96.2344
ENSG00000116717.11_GADD45A	5758.33	0.826721	0.118322	6.98704	2.80748e-12	2.9901e-11	4282.46	3537.93	6489.26	6603.03	7878.98
ENSG00000165912.15_PACSIN3	917.619	-0.825569	0.118186	-6.98533	2.84189e-12	3.02499e-11	1296.9	1197.1	637.36	699.972	756.753
ENSG00000145882.10_PCYOX1L	644.538	-0.957453	0.137117	-6.98273	2.89503e-12	3.07978e-11	885.69	942.691	525.084	455.415	413.808
ENSG00000039068.18_CDH1	88.7713	-2.05181	0.293859	-6.98231	2.90358e-12	3.08709e-11	130.177	207.846	39.6767	34.6616	31.4949
ENSG00000044090.8_CUL7	2332.68	-0.583543	0.0835945	-6.98064	2.93846e-12	3.12237e-11	2893.09	2943.92	1899.42	1902.54	2024.42
ENSG00000151883.16_PARP8	842.007	0.947233	0.135701	6.98027	2.94607e-12	3.12865e-11	524.358	547.443	1171.73	1051.4	915.102
ENSG00000168488.18_ATXN2L	5676.61	0.508124	0.0728021	6.97952	2.96198e-12	3.14373e-11	4545.24	4502.2	6389.64	6298.78	6647.18
ENSG00000010322.15_NISCH	4692.57	-0.612745	0.0878382	-6.97584	3.04054e-12	3.22525e-11	5529.48	6333.07	3794.62	3937.94	3867.75
ENSG00000183475.12_ASB7	883.427	0.757305	0.108581	6.97454	3.06865e-12	3.2532e-11	614.387	629.218	1065.36	1098.58	1009.59
ENSG00000100422.13_CERK	2245.22	-0.684595	0.0981889	-6.97222	3.11978e-12	3.3055e-11	2741.02	3077.94	1701.03	1802.4	1903.69
ENSG00000158109.14_TPRG1L	2068.71	-0.624642	0.0896018	-6.97131	3.14008e-12	3.32509e-11	2683.84	2567.98	1615.77	1696.49	1779.46
ENSG00000175920.15_DOK7	276.722	-1.82513	0.261815	-6.97109	3.14498e-12	3.32836e-11	395.397	604.231	92.8605	112.65	178.471
ENSG00000101447.13_FAM83D	1185.71	0.69942	0.100358	6.96921	3.18722e-12	3.37112e-11	897.856	822.3	1427.52	1366.24	1414.65
ENSG00000156860.15_FBRS	2583.75	1.07969	0.154935	6.96865	3.19997e-12	3.38267e-11	1403.96	1650.28	2718.28	3107.03	4039.22
ENSG00000145246.13_ATP10D	2684.96	-0.705416	0.101239	-6.96783	3.21856e-12	3.40037e-11	3397.98	3610.62	2227.81	2264.56	1923.81
ENSG00000108387.14_SEPT4	153.63	-1.48152	0.212626	-6.96774	3.22065e-12	3.40062e-11	227.506	280.536	82.7302	93.3937	83.9864
ENSG00000006459.10_KDM7A	447.184	1.04402	0.149899	6.96487	3.28699e-12	3.46868e-11	248.188	290.758	520.863	606.578	569.533
ENSG00000171812.10_COL8A2	339.798	-1.70104	0.244263	-6.96399	3.30776e-12	3.4886e-11	394.181	796.177	168.837	176.196	163.599
ENSG00000188042.7_ARL4C	5036.54	-0.51427	0.0738589	-6.96287	3.33417e-12	3.51444e-11	5985.71	6309.22	4370.35	4230.64	4286.81
ENSG00000131374.14_TBC1D5	2431.64	-0.629815	0.0905011	-6.95919	3.42235e-12	3.60532e-11	3093.83	3090.44	2083.45	2039.26	1851.2
ENSG00000088038.17_CNOT3	2061.01	0.626539	0.0900603	6.95689	3.47876e-12	3.66118e-11	1491.56	1608.25	2320.67	2396.46	2488.1
ENSG00000153790.11_C7orf31	247.289	1.31761	0.189398	6.95686	3.47936e-12	3.66118e-11	130.177	123.799	365.533	327.359	289.578
ENSG00000159885.13_ZNF222	176.369	1.54336	0.221854	6.95665	3.48467e-12	3.66468e-11	87.5957	69.2821	237.216	215.672	272.081
ENSG00000122042.9_UBL3	1509.65	0.617794	0.0888337	6.9545	3.53812e-12	3.71876e-11	1147.26	1133.5	1742.4	1774.48	1750.59
ENSG00000119537.15_KDSR	2785.58	0.57909	0.0832961	6.95218	3.59678e-12	3.77826e-11	2112.03	2177.28	3334.53	3215.83	3088.25
ENSG00000142621.19_FHAD1	37.9093	3.03857	0.437149	6.95087	3.63037e-12	3.81137e-11	1.21661	4.54309	59.093	52.9552	71.7384
ENSG00000177302.14_TOP3A	1237.59	0.684854	0.098576	6.94747	3.71888e-12	3.90207e-11	865.008	942.691	1445.25	1444.23	1490.76
ENSG00000023330.14_ALAS1	2514.69	0.644624	0.0928046	6.94603	3.75699e-12	3.93981e-11	2004.97	1744.55	2908.22	2967.42	2948.27
ENSG00000197971.14_MBP	875.842	-1.08453	0.156189	-6.94369	3.81999e-12	4.00359e-11	1296.9	1287.97	692.232	629.686	472.424
ENSG00000181541.5_MAB21L2	818.32	-0.762022	0.109754	-6.943	3.83856e-12	4.02076e-11	1118.06	1059.68	658.465	650.868	604.527
ENSG00000082146.12_STRADB	2339.84	-0.795544	0.114643	-6.93929	3.94078e-12	4.12549e-11	2990.42	3306.23	1977.08	1842.84	1582.62
ENSG00000172794.19_RAB37	111.251	-1.83161	0.263986	-6.93829	3.96885e-12	4.15251e-11	232.372	170.366	42.2093	50.0667	61.2401
ENSG00000133101.9_CCNA1	619.056	0.993663	0.143255	6.93632	4.02443e-12	4.20827e-11	402.697	365.719	874.577	747.15	705.136
ENSG00000148484.17_RSU1	4372.94	-0.521353	0.0751648	-6.93613	4.02989e-12	4.21159e-11	5412.69	5289.29	3646.04	3848.4	3668.28
ENSG00000196230.12_TUBB	63658.5	-0.508542	0.0733636	-6.93181	4.15504e-12	4.33992e-11	78601.3	76479.5	56090.2	55679	51442.6
ENSG00000152284.4_TCF7L1	921.588	-0.706503	0.101954	-6.92963	4.21939e-12	4.40463e-11	1200.79	1206.19	758.923	721.154	720.884
ENSG00000169379.15_ARL13B	759.619	0.802313	0.115809	6.9279	4.27122e-12	4.45621e-11	532.874	512.234	951.398	864.614	936.974
ENSG00000090863.11_GLG1	8480.97	-0.58915	0.0850443	-6.92756	4.28147e-12	4.46438e-11	10567.5	10696.7	7485.4	7139.32	6515.95
ENSG00000065526.10_SPEN	4053.6	0.589077	0.0850782	6.92395	4.39213e-12	4.57716e-11	3054.9	3156.31	4912.32	4744.79	4399.66
ENSG00000186260.16_MKL2	970.671	-0.899227	0.129875	-6.92376	4.39797e-12	4.58065e-11	1340.7	1361.79	782.56	756.778	611.526
ENSG00000163811.11_WDR43	3747.32	0.547352	0.0790668	6.92265	4.43276e-12	4.61428e-11	3009.89	2850.79	4399.9	4313.44	4162.58
ENSG00000048405.9_ZNF800	1252.56	0.71789	0.103711	6.92203	4.45232e-12	4.63202e-11	935.571	864.323	1564.28	1486.6	1412.02
ENSG00000140830.8_TXNL4B	609.177	0.825672	0.119289	6.92158	4.46629e-12	4.64131e-11	423.379	404.335	731.065	745.224	741.88
ENSG00000159216.18_RUNX1	4200.57	0.542391	0.0783616	6.92164	4.46453e-12	4.64131e-11	3272.67	3311.91	4871.8	4950.83	4595.63
ENSG00000143341.11_HMCN1	193.492	-1.49006	0.215339	-6.91961	4.52878e-12	4.70359e-11	268.87	372.533	100.458	123.241	102.358
ENSG00000175471.19_MCTP1	1097.06	0.692766	0.100165	6.91623	4.63811e-12	4.81442e-11	798.094	798.448	1323.68	1244.93	1320.16
ENSG00000181751.9_C5orf30	989.991	0.740361	0.107072	6.91459	4.69212e-12	4.86774e-11	719.015	687.143	1132.9	1165.98	1244.92
ENSG00000196562.14_SULF2	1132.76	-0.9707	0.140414	-6.91314	4.74038e-12	4.91504e-11	1360.17	1866.07	784.249	840.544	812.744
ENSG00000077380.15_DYNC1I2	4956.92	-0.522051	0.0755201	-6.91274	4.75373e-12	4.92611e-11	6139	5995.74	4308.73	4292.26	4048.85
ENSG00000168356.11_SCN11A	32.1956	3.20059	0.463031	6.91226	4.76996e-12	4.94014e-11	0	2.27155	60.7814	56.8065	41.1184
ENSG00000159128.14_IFNGR2	1152.26	0.686417	0.0993102	6.91184	4.78401e-12	4.95191e-11	860.141	822.3	1402.19	1317.14	1359.53
ENSG00000113600.10_C9	42.2952	2.9353	0.424684	6.91172	4.78811e-12	4.95336e-11	7.29964	1.13577	75.9767	69.3232	57.7407
ENSG00000187325.4_TAF9B	1266.95	-0.800289	0.115817	-6.90994	4.84846e-12	5.01298e-11	1828.56	1586.67	1022.31	1010.96	886.232
ENSG00000092010.14_PSME1	3587.05	0.661166	0.0957153	6.90763	4.92808e-12	5.08959e-11	2671.67	2631.59	4468.28	4342.33	3821.38
ENSG00000168386.18_FILIP1L	2489.26	-0.93194	0.134914	-6.90765	4.92732e-12	5.08959e-11	3385.82	3618.57	2107.09	1837.06	1497.76
ENSG00000082258.12_CCNT2	1985.51	0.610977	0.088452	6.90745	4.93454e-12	5.0934e-11	1506.16	1503.76	2411	2281.89	2224.77
ENSG00000205269.5_TMEM170B	499.551	-0.952367	0.137896	-6.9064	4.97121e-12	5.12837e-11	674	740.524	376.507	381.277	325.447
ENSG00000157613.10_CREB3L1	4089.43	-0.738775	0.106978	-6.90583	4.99107e-12	5.14597e-11	5665.74	5132.56	3542.2	3228.34	2878.28
ENSG00000111653.19_ING4	357.892	-1.03805	0.15033	-6.90512	5.01614e-12	5.16893e-11	502.459	538.356	238.905	274.404	235.337
ENSG00000168118.11_RAB4A	1049.84	-0.688521	0.0997287	-6.90394	5.05785e-12	5.20899e-11	1394.23	1331.13	871.2	824.176	828.491
ENSG00000187800.13_PEAR1	446.45	0.976092	0.141529	6.89676	5.32001e-12	5.47593e-11	302.935	256.685	552.098	553.623	566.908
ENSG00000162971.10_TYW5	679.798	0.893809	0.129611	6.89608	5.34563e-12	5.49921e-11	402.697	487.247	802.821	864.614	841.614
ENSG00000111790.13_FGFR1OP2	1621.86	0.687702	0.0997496	6.89428	5.41384e-12	5.56628e-11	1225.12	1141.45	2043.77	1838.99	1859.95
ENSG00000159212.12_CLIC6	492.81	-1.01394	0.147093	-6.89322	5.45442e-12	5.60486e-11	729.964	692.821	349.493	389.943	301.826
ENSG00000070019.4_GUCY2C	38.0779	3.01932	0.438047	6.8927	5.47426e-12	5.62211e-11	6.08304	0	64.1581	60.6578	59.4904
ENSG00000164128.6_NPY1R	108.446	1.84804	0.268232	6.8897	5.59094e-12	5.73874e-11	34.065	43.1594	174.746	141.535	148.726
ENSG00000109790.16_KLHL5	5203.12	-0.614756	0.0892369	-6.88904	5.61713e-12	5.76242e-11	6708.37	6455.73	4535.81	4377.95	3937.74
ENSG00000179348.11_GATA2	406.43	1.11412	0.161732	6.88867	5.63173e-12	5.77095e-11	232.372	238.512	469.367	498.742	593.154
ENSG00000237765.6_FAM200B	1033.68	-0.807071	0.117159	-6.88868	5.63139e-12	5.77095e-11	1491.56	1301.6	853.472	779.886	741.88
ENSG00000122877.13_EGR2	50.2377	2.69074	0.390612	6.88853	5.63708e-12	5.77322e-11	3.64982	11.3577	86.107	72.2116	77.8624
ENSG00000154096.13_THY1	4151.34	-0.563217	0.0817755	-6.88736	5.68376e-12	5.8178e-11	4974.71	5338.13	3332.85	3525.85	3585.17
ENSG00000150556.16_LYPD6B	182.699	-1.3552	0.19686	-6.88407	5.81678e-12	5.95064e-11	294.419	289.622	122.407	111.687	95.3596
ENSG00000108932.11_SLC16A6	181.049	1.59977	0.232442	6.88244	5.88341e-12	6.01546e-11	92.4622	62.4675	286.179	225.3	238.836
ENSG00000143772.9_ITPKB	647.033	-0.905311	0.131585	-6.88004	5.9835e-12	6.1144e-11	822.427	982.444	498.07	484.299	447.928
ENSG00000167065.13_DUSP18	372.147	-1.00792	0.146509	-6.87961	6.00186e-12	6.12976e-11	500.026	572.43	267.607	269.59	251.084
ENSG00000135842.16_FAM129A	2110.34	0.71393	0.103777	6.87944	6.00863e-12	6.13327e-11	1648.5	1390.19	2619.51	2446.53	2446.98
ENSG00000128805.14_ARHGAP22	1708.19	0.801634	0.116538	6.87872	6.03946e-12	6.16132e-11	1255.54	1094.89	1885.91	2033.48	2271.13
ENSG00000266028.7_SRGAP2	2623.11	0.59415	0.0864066	6.87621	6.14648e-12	6.26702e-11	1962.39	2046.66	3147.97	3072.36	2886.16
ENSG00000137809.16_ITGA11	2514.12	-2.10467	0.306163	-6.87432	6.22843e-12	6.34707e-11	3432.05	6264.92	1063.67	984.967	824.992
ENSG00000114573.9_ATP6V1A	3029.75	-0.595885	0.0866934	-6.87348	6.26555e-12	6.38136e-11	3756.88	3857.08	2504.7	2658.35	2371.74
ENSG00000262209.2_PCDHGB3	139.325	-2.04142	0.297069	-6.87187	6.33663e-12	6.45018e-11	194.657	335.053	37.1442	60.6578	69.1138
ENSG00000134308.13_YWHAQ	16855.4	-0.438546	0.0638597	-6.86733	6.54156e-12	6.6551e-11	20012	20015.7	14628.1	14693.6	14927.7
ENSG00000171490.12_RSL1D1	6216.76	0.498496	0.0726031	6.86604	6.60085e-12	6.71172e-11	4822.63	5130.29	7064.99	7046.89	7018.99
ENSG00000170145.4_SIK2	2144.33	-0.67796	0.0987668	-6.86425	6.68416e-12	6.79267e-11	2711.82	2833.75	1832.73	1767.74	1575.62
ENSG00000111642.14_CHD4	14400.6	-0.48895	0.071235	-6.86389	6.70086e-12	6.80588e-11	17245.4	17588.6	12568.2	12734.3	11866.6
ENSG00000107518.16_ATRNL1	293.008	-1.26516	0.184422	-6.86013	6.87972e-12	6.98369e-11	400.264	512.234	195.851	198.341	158.349
ENSG00000107968.9_MAP3K8	496.816	0.938031	0.136749	6.85953	6.90878e-12	7.00932e-11	294.419	340.732	633.984	591.173	623.774
ENSG00000214900.8_LINC01588	41.2366	2.85157	0.415716	6.85942	6.91421e-12	7.01097e-11	3.64982	5.67886	75.1326	58.7321	62.9898
ENSG00000163602.9_RYBP	1782.41	0.598825	0.0873038	6.85909	6.92997e-12	7.02308e-11	1330.97	1386.78	2088.52	2088.36	2017.42
ENSG00000073350.13_LLGL2	240.239	-1.44547	0.210777	-6.85784	6.99109e-12	7.08113e-11	326.051	461.124	116.498	144.423	153.1
ENSG00000237172.3_B3GNT9	559.938	-0.861466	0.125719	-6.85233	7.26555e-12	7.35507e-11	736.047	804.127	415.339	401.497	442.678
ENSG00000079974.17_RABL2B	988.021	-0.723798	0.105665	-6.84991	7.38964e-12	7.47247e-11	1346.78	1249.35	820.549	769.295	754.128
ENSG00000146802.12_TMEM168	527.722	-0.893335	0.130414	-6.84998	7.38626e-12	7.47247e-11	698.333	767.782	371.442	417.865	383.188
ENSG00000176840.11_MIR7-3HG	25.9913	3.29839	0.481673	6.84778	7.50073e-12	7.58064e-11	0	0	40.5209	50.0667	39.3686
ENSG00000167535.7_CACNB3	847.52	-0.807963	0.118012	-6.84643	7.5715e-12	7.64796e-11	1047.5	1242.54	645.802	650.868	650.895
ENSG00000132256.18_TRIM5	3065.65	0.873104	0.127534	6.84603	7.59267e-12	7.66514e-11	2076.75	1984.2	4323.08	3768.48	3175.74
ENSG00000180340.6_FZD2	2914.94	-0.763327	0.11152	-6.84478	7.65956e-12	7.72843e-11	3536.68	4223.94	2113	2227.01	2474.1
ENSG00000196338.12_NLGN3	58.6265	2.42191	0.353871	6.84404	7.69911e-12	7.76408e-11	12.1661	12.4935	88.6395	101.096	78.7373
ENSG00000129680.15_MAP7D3	2217.02	-0.763846	0.111626	-6.84292	7.7595e-12	7.82069e-11	3138.85	2765.61	1891.82	1726.34	1562.5
ENSG00000123610.4_TNFAIP6	40.798	2.90562	0.424635	6.84264	7.77465e-12	7.83167e-11	4.86643	3.40732	77.6651	66.4347	51.6167
ENSG00000143252.14_SDHC	2861.75	-0.635643	0.0929313	-6.83992	7.92376e-12	7.97751e-11	3853	3441.39	2346.84	2223.16	2444.36
ENSG00000106772.17_PRUNE2	1049.32	-0.929308	0.136014	-6.83246	8.34729e-12	8.39932e-11	1483.04	1467.42	859.381	797.217	639.522
ENSG00000101350.7_KIF3B	2393.76	-0.593675	0.0869262	-6.82964	8.51255e-12	8.56093e-11	2956.36	3055.23	2069.94	2004.6	1882.7
ENSG00000146966.12_DENND2A	340.935	-1.07628	0.157615	-6.82858	8.57597e-12	8.61999e-11	487.86	515.641	232.995	259.962	208.216
ENSG00000183018.8_SPNS2	1236.83	-0.855377	0.125302	-6.82654	8.69849e-12	8.73838e-11	1607.14	1787.71	815.484	939.714	1034.08
ENSG00000196453.7_ZNF777	978.092	0.772711	0.113236	6.82393	8.85852e-12	8.89428e-11	717.798	648.526	1129.52	1140.94	1253.67
ENSG00000071127.16_WDR1	25950.6	-0.446802	0.0654924	-6.82219	8.96631e-12	8.9976e-11	31210.8	30603.4	22177.6	23161.6	22599.3
ENSG00000090487.10_SPG21	2896.08	-0.582319	0.0854146	-6.81755	9.2604e-12	9.28765e-11	3526.94	3716.25	2335.86	2541.85	2359.49
ENSG00000156052.10_GNAQ	3785.29	-0.716655	0.105143	-6.81602	9.35968e-12	9.38211e-11	5078.12	4842.94	3321.87	3002.08	2681.44
ENSG00000162437.14_RAVER2	577.243	-0.826466	0.121292	-6.81383	9.5033e-12	9.52089e-11	773.762	796.177	461.77	418.828	435.68
ENSG00000104880.17_ARHGEF18	2850.14	0.77087	0.113145	6.81309	9.55227e-12	9.56474e-11	1885.74	2097.77	3088.03	3352.55	3826.63
ENSG00000132334.16_PTPRE	193.367	-1.88155	0.276185	-6.81265	9.58188e-12	9.58917e-11	313.885	395.249	110.588	97.245	49.8669
ENSG00000185567.6_AHNAK2	9567.28	-0.639752	0.0939141	-6.8121	9.61819e-12	9.62028e-11	13264.7	11154.4	7832.36	8036.67	7548.28
ENSG00000184743.12_ATL3	3942.86	-0.574886	0.0843963	-6.81174	9.64224e-12	9.6391e-11	4997.82	4838.39	3325.25	3458.46	3094.37
ENSG00000182093.14_WRB	1032.59	-0.682771	0.100237	-6.81154	9.65626e-12	9.64787e-11	1315.15	1359.52	829.835	858.837	799.621
ENSG00000120437.8_ACAT2	2295.1	-0.619521	0.0910214	-6.80632	1.00127e-11	9.99854e-11	2777.51	3038.19	1858.05	1977.64	1824.08
ENSG00000177728.14_KIAA0195	1667.22	-0.638299	0.0938464	-6.80153	1.03516e-11	1.03314e-10	2071.88	2180.68	1371.8	1423.05	1288.67
ENSG00000101782.14_RIOK3	3141.92	0.565249	0.0831132	6.80095	1.03933e-11	1.03674e-10	2446.6	2423.74	3619.03	3773.3	3446.94
ENSG00000179163.11_FUCA1	721.416	-0.862088	0.12693	-6.79181	1.10734e-11	1.10398e-10	914.889	1069.9	579.112	530.515	512.667
ENSG00000140848.16_CPNE2	1338.21	-0.676352	0.0996405	-6.78792	1.13761e-11	1.13354e-10	1698.38	1760.45	1009.65	1087.03	1135.57
ENSG00000254221.2_PCDHGB1	90.6739	-1.86316	0.274487	-6.78781	1.1385e-11	1.13381e-10	145.993	185.131	45.586	44.2898	32.3698
ENSG00000225206.5_MIR137HG	383.74	1.03724	0.152837	6.78659	1.14814e-11	1.1428e-10	242.105	222.611	514.953	443.861	495.17
ENSG00000061455.10_PRDM6	62.1455	2.51015	0.370195	6.78062	1.19664e-11	1.19043e-10	10.9495	12.4935	95.393	70.286	121.605
ENSG00000165238.16_WNK2	375.743	-1.04214	0.153753	-6.77801	1.21846e-11	1.21148e-10	604.654	490.654	266.763	254.185	262.458
ENSG00000175166.16_PSMD2	24640.4	0.532733	0.0786144	6.77654	1.23088e-11	1.22317e-10	19717.6	19087.8	26703.3	27771.6	29921.9
ENSG00000143514.16_TP53BP2	3391.09	0.546645	0.0806742	6.77596	1.23585e-11	1.22745e-10	2616.92	2687.24	3901.83	4021.71	3727.77
ENSG00000107362.13_ABHD17B	835.359	0.776916	0.114669	6.77529	1.24158e-11	1.23248e-10	552.34	611.046	983.477	1056.22	973.718
ENSG00000171786.5_NHLH1	56.4932	2.55272	0.376883	6.77325	1.25925e-11	1.24934e-10	15.8159	4.54309	90.3279	89.5424	82.2367
ENSG00000083814.12_ZNF671	356.96	1.01401	0.149749	6.77142	1.27527e-11	1.26455e-10	231.155	206.711	446.574	441.935	458.426
ENSG00000128564.6_VGF	141.261	2.12902	0.314486	6.76986	1.2891e-11	1.27758e-10	30.4152	48.8382	169.681	160.791	296.577
ENSG00000141401.11_IMPA2	234.798	-1.19254	0.176316	-6.76365	1.34558e-11	1.33283e-10	366.199	349.818	135.07	163.68	159.224
ENSG00000171126.7_KCNG3	30.0884	3.13377	0.463657	6.75882	1.39121e-11	1.37729e-10	2.43321	0	54.0279	42.3642	51.6167
ENSG00000100100.12_PIK3IP1	410.347	-0.959985	0.142088	-6.75627	1.41589e-11	1.40097e-10	563.289	601.96	314.881	300.4	271.206
ENSG00000078804.12_TP53INP2	1772.53	-0.699726	0.103591	-6.75471	1.4312e-11	1.41536e-10	2125.41	2493.02	1451.16	1432.68	1360.41
ENSG00000166348.17_USP54	2566.59	-0.741175	0.109733	-6.75435	1.43481e-11	1.41816e-10	3342.02	3441.39	2241.31	2020	1788.21
ENSG00000170266.15_GLB1	3162.59	-0.607551	0.0900166	-6.74932	1.48542e-11	1.46741e-10	3889.49	4092.19	2771.46	2619.84	2439.98
ENSG00000271601.3_LIX1L	2683.27	-0.785659	0.116413	-6.74888	1.48994e-11	1.47108e-10	3563.44	3635.61	2367.1	2020	1830.2
ENSG00000123094.15_RASSF8	5218.95	-0.606258	0.0898364	-6.74846	1.4942e-11	1.47449e-10	6597.66	6568.17	4641.33	4309.59	3977.98
ENSG00000196549.10_MME	11857.8	-0.77105	0.114263	-6.74805	1.49843e-11	1.47787e-10	16661.4	14995.6	10391.9	9229.61	8010.21
ENSG00000181135.15_ZNF707	471.571	1.06988	0.158574	6.7469	1.5104e-11	1.48888e-10	253.054	306.659	543.656	583.47	671.017
ENSG00000186812.12_ZNF397	632.555	-0.796298	0.118086	-6.74337	1.54752e-11	1.52465e-10	849.192	854.101	515.798	475.634	468.049
ENSG00000113361.12_CDH6	578.703	-0.868241	0.12877	-6.74257	1.55606e-11	1.53224e-10	838.242	757.56	460.081	435.195	402.435
ENSG00000256537.4_SMIM10L1	996.005	-0.734364	0.108955	-6.74009	1.58286e-11	1.5578e-10	1371.12	1255.03	777.495	831.878	744.505
ENSG00000021574.11_SPAST	789.548	-0.723216	0.107318	-6.739	1.59478e-11	1.56869e-10	1008.57	1065.35	635.672	624.871	613.276
ENSG00000129003.15_VPS13C	3690.02	-0.715732	0.106222	-6.73811	1.6046e-11	1.57752e-10	4899.28	4769.11	3129.4	3091.62	2560.71
ENSG00000092978.10_GPATCH2	831.959	0.778704	0.115577	6.73752	1.61114e-11	1.5831e-10	618.036	540.628	1026.53	967.636	1006.96
ENSG00000171603.16_CLSTN1	8431.64	-0.512825	0.0761437	-6.73496	1.6397e-11	1.6103e-10	9909.27	10663.8	7324.16	7315.52	6945.5
ENSG00000174574.15_AKIRIN1	5133.26	0.483373	0.0717921	6.73295	1.66257e-11	1.63189e-10	4163.23	4114.91	5922.81	5758.64	5706.7
ENSG00000138757.14_G3BP2	8363.19	-0.529523	0.0786841	-6.72974	1.69969e-11	1.66743e-10	10319.3	10210.6	7434.75	7169.17	6682.17
ENSG00000086475.14_SEPHS1	2831.22	-0.619869	0.0922332	-6.72067	1.80893e-11	1.77366e-10	3815.28	3361.89	2410.15	2310.77	2258.01
ENSG00000049759.16_NEDD4L	7758.96	0.631654	0.0939939	6.72017	1.81519e-11	1.77884e-10	6257.01	5383.56	9402.54	9220.95	8530.75
ENSG00000144476.5_ACKR3	370.223	-1.06056	0.157843	-6.71906	1.82907e-11	1.79149e-10	585.188	499.74	232.995	282.107	251.084
ENSG00000179364.13_PACS2	1946.86	-0.602523	0.0896905	-6.71779	1.84498e-11	1.80611e-10	2374.82	2529.37	1538.95	1656.05	1635.11
ENSG00000112033.13_PPARD	2034.62	0.562952	0.08381	6.71701	1.85497e-11	1.81493e-10	1591.32	1566.23	2300.41	2323.29	2391.86
ENSG00000162976.12_PQLC3	261.114	-1.08093	0.160936	-6.71654	1.86085e-11	1.81971e-10	394.181	375.941	177.279	185.825	172.347
ENSG00000111181.12_SLC6A12	29.7053	3.11841	0.464343	6.71575	1.87099e-11	1.82866e-10	1.21661	1.13577	39.6767	54.8808	51.6167
ENSG00000054965.10_FAM168A	1631.45	-0.707213	0.10532	-6.71488	1.88223e-11	1.83867e-10	2112.03	2150.02	1359.98	1368.17	1167.06
ENSG00000204977.9_TRIM13	1102.91	-0.700852	0.10441	-6.71252	1.9129e-11	1.86764e-10	1457.5	1417.44	888.928	930.086	820.617
ENSG00000101544.8_ADNP2	1509.57	0.649056	0.0967244	6.71036	1.94143e-11	1.89449e-10	1077.91	1166.44	1697.66	1835.14	1770.71
ENSG00000130816.14_DNMT1	5668.25	0.513793	0.076593	6.70809	1.97182e-11	1.92312e-10	4356.67	4650.99	6252.04	6500.01	6581.56
ENSG00000105825.11_TFPI2	535.835	1.22491	0.18262	6.70746	1.98044e-11	1.93051e-10	221.423	358.904	720.091	670.124	708.635
ENSG00000143437.20_ARNT	1414.7	-0.70762	0.105533	-6.70519	2.01141e-11	1.95966e-10	1765.3	1930.81	1164.98	1176.57	1035.83
ENSG00000234155.1_RP11-30P6.6	48.9014	2.5316	0.377594	6.70455	2.02028e-11	1.96726e-10	9.73286	7.95041	69.2232	77.9886	79.6121
ENSG00000261609.3_GAN	1207.28	0.709906	0.105886	6.70443	2.02195e-11	1.96785e-10	810.26	930.198	1395.44	1430.75	1469.76
ENSG00000136152.14_COG3	1291.86	0.652014	0.0973357	6.69861	2.10411e-11	2.04673e-10	919.755	998.344	1544.86	1483.71	1512.63
ENSG00000172831.11_CES2	1479.56	0.611776	0.0913481	6.6972	2.12458e-11	2.06554e-10	1139.96	1101.7	1673.18	1735.01	1747.97
ENSG00000141279.15_NPEPPS	6209.9	-0.525706	0.0785428	-6.69324	2.18285e-11	2.12108e-10	7455.37	7767.55	5470.33	5349.44	5006.82
ENSG00000138172.10_CALHM2	146.286	-1.46181	0.218424	-6.69255	2.19309e-11	2.1299e-10	212.906	269.178	80.1977	79.9142	89.2356
ENSG00000120129.5_DUSP1	6947.55	-0.55112	0.0823532	-6.69215	2.19918e-11	2.13469e-10	8073.41	9113.44	5825.73	5797.15	5928.04
ENSG00000197119.12_SLC25A29	1429.3	-0.738522	0.110359	-6.69201	2.20125e-11	2.13557e-10	1867.49	1906.96	1055.23	1064.88	1251.92
ENSG00000198900.5_TOP1	8119.55	0.569421	0.0850918	6.69185	2.20366e-11	2.13679e-10	6378.67	6182.01	9894.7	9475.13	8667.22
ENSG00000147475.14_ERLIN2	2529.33	-0.660736	0.0987585	-6.69042	2.22531e-11	2.15664e-10	3288.49	3215.37	2240.47	2006.52	1895.82
ENSG00000119718.10_EIF2B2	1613.02	0.609173	0.091084	6.68803	2.26189e-11	2.19094e-10	1197.14	1249.35	1807.4	1909.28	1901.94
ENSG00000182687.3_GALR2	37.5337	2.82877	0.423187	6.68444	2.31814e-11	2.24424e-10	4.86643	3.40732	54.8721	60.6578	63.8647
ENSG00000240230.5_COX19	601.175	0.926137	0.1386	6.68207	2.35596e-11	2.27966e-10	390.531	382.755	657.621	797.217	777.749
ENSG00000175183.9_CSRP2	1696.55	-0.617585	0.0924362	-6.68121	2.36978e-11	2.29183e-10	2214.23	2083.01	1345.63	1379.72	1460.14
ENSG00000236882.7_LINC01554	26.7156	3.16348	0.473524	6.68071	2.37779e-11	2.29837e-10	1.21661	0	46.4302	40.4385	45.4926
ENSG00000125968.8_ID1	939.226	0.870741	0.130355	6.67977	2.39323e-11	2.31208e-10	601.004	643.983	1040.88	1111.1	1299.17
ENSG00000101361.14_NOP56	5158.23	0.557404	0.0834706	6.67785	2.4248e-11	2.34134e-10	4248.39	3778.72	5984.43	5971.42	5808.19
ENSG00000096968.12_JAK2	623.011	1.00299	0.150212	6.67719	2.43572e-11	2.35039e-10	424.596	344.139	864.446	783.737	698.137
ENSG00000214293.8_APTR	191.914	1.38343	0.207189	6.67713	2.43672e-11	2.35039e-10	80.2961	107.898	243.97	257.073	270.331
ENSG00000103047.7_TANGO6	741.663	-0.821337	0.123019	-6.67649	2.44732e-11	2.35938e-10	930.705	1082.39	532.681	582.507	580.031
ENSG00000170791.17_CHCHD7	1315.7	0.698044	0.104573	6.67517	2.46951e-11	2.37952e-10	1013.43	896.125	1560.9	1490.45	1617.61
ENSG00000005379.15_BZRAP1	192.934	-1.64713	0.246853	-6.67254	2.51415e-11	2.42127e-10	282.253	386.163	86.9512	78.9514	130.354
ENSG00000136830.11_FAM129B	11727.1	0.716621	0.107401	6.67241	2.51629e-11	2.42206e-10	7833.73	9019.17	12613	13725	15444.8
ENSG00000176927.14_EFCAB5	117.547	1.76584	0.264756	6.6697	2.56327e-11	2.46599e-10	54.7473	34.0732	157.019	180.048	161.849
ENSG00000037474.14_NSUN2	3795.06	0.515324	0.0772747	6.66874	2.58015e-11	2.48093e-10	3071.93	2955.28	4438.73	4295.15	4214.19
ENSG00000057252.12_SOAT1	5235.1	0.597876	0.089686	6.66632	2.62289e-11	2.52071e-10	4217.98	3768.49	6295.94	6179.39	5713.7
ENSG00000163788.13_SNRK	1166.38	0.688017	0.10321	6.66618	2.62546e-11	2.52186e-10	846.759	854.101	1450.31	1380.69	1300.04
ENSG00000103257.8_SLC7A5	20267	-0.500754	0.0751222	-6.66585	2.63133e-11	2.52619e-10	24457.5	24780.3	16437.1	17478.1	18182.2
ENSG00000063180.8_CA11	422.16	-0.998633	0.149833	-6.66496	2.64736e-11	2.53893e-10	563.289	650.798	312.349	267.664	316.699
ENSG00000273559.4_CWC25	986.114	0.726887	0.10906	6.665	2.64673e-11	2.53893e-10	721.448	688.278	1098.29	1207.38	1215.18
ENSG00000186174.12_BCL9L	6319.13	-0.46643	0.0700165	-6.66171	2.70651e-11	2.59384e-10	7733.97	7427.95	5493.96	5435.13	5504.61
ENSG00000258791.7_LINC00520	58.8331	2.56666	0.385289	6.66166	2.70744e-11	2.59384e-10	17.0325	3.40732	83.5744	89.5424	100.609
ENSG00000079931.14_MOXD1	646.644	-1.14441	0.171802	-6.6612	2.71604e-11	2.60073e-10	896.64	1048.32	510.733	438.084	339.445
ENSG00000147133.15_TAF1	1884.13	-0.6212	0.0932746	-6.65991	2.73999e-11	2.62229e-10	2350.49	2427.15	1554.15	1634.87	1454.02
ENSG00000121931.15_LRIF1	855.806	0.722345	0.108466	6.65965	2.74473e-11	2.62547e-10	627.769	598.552	1007.11	1055.25	990.34
ENSG00000262202.4_RP11-160E2.6	46.9987	2.60402	0.391046	6.65912	2.75481e-11	2.63374e-10	6.08304	9.08618	66.6907	67.3975	85.7361
ENSG00000124942.13_AHNAK	40493.9	-0.666101	0.100063	-6.65684	2.79773e-11	2.67339e-10	55495.5	48817.8	34623.4	34162.8	29369.9
ENSG00000166340.14_TPP1	6300.97	-0.722934	0.108602	-6.65672	2.80012e-11	2.67428e-10	8011.36	8539.88	5467.79	5149.17	4336.67
ENSG00000108654.11_DDX5	17646.6	-0.449434	0.0675195	-6.65636	2.80699e-11	2.67945e-10	20707.9	21368.4	15663.9	15518.8	14974.1
ENSG00000138772.12_ANXA3	2515.86	-0.692994	0.104112	-6.65621	2.80975e-11	2.6807e-10	3020.84	3519.76	2068.26	2100.88	1869.57
ENSG00000138771.14_SHROOM3	2297.09	-0.829335	0.124642	-6.65375	2.85709e-11	2.72445e-10	2710.6	3542.48	1848.77	1738.86	1644.73
ENSG00000079691.16_LRRC16A	397.3	-1.15488	0.173601	-6.65248	2.88199e-11	2.74678e-10	587.621	611.046	294.621	284.995	208.216
ENSG00000157450.15_RNF111	2108.71	0.679566	0.102157	6.65218	2.88789e-11	2.75097e-10	1570.64	1517.39	2572.23	2631.39	2251.89
ENSG00000205560.12_CPT1B	122.75	1.72975	0.260057	6.65142	2.90286e-11	2.7638e-10	43.7979	51.1098	198.384	175.234	145.227
ENSG00000082556.10_OPRK1	26.4598	3.1509	0.473888	6.64903	2.95023e-11	2.80745e-10	1.21661	0	45.586	45.2526	40.2435
ENSG00000197208.5_SLC22A4	273.945	1.15499	0.173728	6.64827	2.96558e-11	2.8206e-10	164.242	145.379	324.167	365.872	370.065
ENSG00000164117.12_FBXO8	496.675	0.931729	0.14024	6.6438	3.05692e-11	2.90597e-10	302.935	333.917	591.774	586.359	668.392
ENSG00000158691.14_ZSCAN12	515.283	0.859917	0.129449	6.64288	3.07617e-11	2.92276e-10	361.332	325.967	628.919	636.425	623.774
ENSG00000054983.16_GALC	805.505	-0.801201	0.120659	-6.64023	3.13199e-11	2.97426e-10	1036.55	1135.77	659.309	631.611	564.284
ENSG00000177234.7_LINC01561	100.324	-1.63717	0.246591	-6.63921	3.15366e-11	2.9933e-10	158.159	188.538	54.0279	51.0296	49.8669
ENSG00000163131.10_CTSS	111.84	2.02603	0.305244	6.63743	3.192e-11	3.02813e-10	37.7148	30.6659	211.046	160.791	118.981
ENSG00000139890.9_REM2	27.374	3.1519	0.474966	6.63605	3.22202e-11	3.05502e-10	1.21661	0	35.4558	52.9552	47.2424
ENSG00000109472.13_CPE	993.211	-0.69976	0.105452	-6.63581	3.22736e-11	3.05851e-10	1265.27	1323.18	836.588	789.514	751.504
ENSG00000042832.11_TG	68.9913	2.35218	0.354564	6.634	3.26702e-11	3.09451e-10	17.0325	13.6293	75.1326	128.055	111.107
ENSG00000123080.10_CDKN2C	472.524	1.04605	0.157704	6.63301	3.28919e-11	3.1139e-10	304.152	264.635	527.616	596.95	669.267
ENSG00000188897.8_CTD-3088G3.8	37.1816	2.95212	0.445206	6.6309	3.33636e-11	3.15693e-10	0	5.67886	46.4302	66.4347	67.3641
ENSG00000127418.14_FGFRL1	2858.03	-0.554141	0.0835706	-6.63081	3.33839e-11	3.15723e-10	3664.42	3414.13	2340.08	2387.8	2483.72
ENSG00000074590.13_NUAK1	2754.37	-0.591686	0.0892369	-6.6305	3.34543e-11	3.16226e-10	3314.04	3598.13	2237.94	2411.87	2209.89
ENSG00000055044.10_NOP58	3595.68	0.605625	0.0913578	6.62916	3.37604e-11	3.18956e-10	2916.21	2548.67	4324.76	4061.18	4127.58
ENSG00000003402.19_CFLAR	2966.81	0.685611	0.103453	6.62725	3.4199e-11	3.22934e-10	2095	2236.34	3870.59	3388.17	3243.98
ENSG00000134323.10_MYCN	113.532	-2.08756	0.315065	-6.6258	3.45367e-11	3.25955e-10	156.942	280.536	29.5465	57.7693	42.8681
ENSG00000198663.16_C6orf89	3110.99	-0.511871	0.0773077	-6.62122	3.56249e-11	3.36054e-10	3747.15	3841.18	2683.67	2696.86	2586.08
ENSG00000103241.6_FOXF1	25.8029	3.21109	0.485228	6.61769	3.64863e-11	3.44003e-10	0	0	30.3907	54.8808	43.7429
ENSG00000095587.8_TLL2	75.8595	2.00787	0.303472	6.61633	3.68226e-11	3.46996e-10	21.8989	24.987	115.653	112.65	104.108
ENSG00000213190.3_MLLT11	2420.5	-0.629101	0.0950882	-6.61597	3.69133e-11	3.47673e-10	2894.31	3260.8	2045.46	2020.96	1880.95
ENSG00000135363.11_LMO2	27.4198	3.14559	0.475764	6.61166	3.80038e-11	3.5776e-10	0	1.13577	55.7163	45.2526	34.9943
ENSG00000213694.3_S1PR3	511.035	0.875957	0.132501	6.61093	3.81913e-11	3.59342e-10	316.318	358.904	644.958	619.094	615.9
ENSG00000227507.2_LTB	41.4931	2.7361	0.414103	6.6073	3.9139e-11	3.6807e-10	8.51625	2.27155	63.3139	71.2488	62.115
ENSG00000115091.11_ACTR3	15712.9	-0.465039	0.070391	-6.60652	3.93472e-11	3.69839e-10	19211.4	18469.9	13867.4	13874.3	13141.3
ENSG00000166483.10_WEE1	2257.39	-0.652432	0.0987588	-6.60632	3.93996e-11	3.70143e-10	2996.5	2791.73	1971.17	1830.32	1697.23
ENSG00000114127.10_XRN1	2557.69	0.810557	0.122761	6.60274	4.03632e-11	3.79002e-10	1762.86	1737.73	3476.36	3177.31	2634.2
ENSG00000168772.10_CXXC4	100.38	1.84777	0.279889	6.6018	4.06183e-11	3.81203e-10	43.7979	27.2585	137.602	155.014	138.228
ENSG00000163877.9_SNIP1	852.004	0.718409	0.108822	6.60169	4.06487e-11	3.81294e-10	618.036	605.367	998.672	981.116	1056.83
ENSG00000132549.18_VPS13B	1932	-0.649364	0.0983664	-6.60148	4.0707e-11	3.81646e-10	2507.43	2440.78	1652.92	1622.35	1436.52
ENSG00000079950.13_STX7	1809.09	-0.7653	0.11594	-6.60083	4.08875e-11	3.83143e-10	2461.2	2360.14	1561.74	1428.83	1233.55
ENSG00000144749.13_LRIG1	687.444	-0.989635	0.149972	-6.5988	4.14509e-11	3.88225e-10	916.105	1055.13	556.319	495.853	413.808
ENSG00000169583.12_CLIC3	340.642	-1.09179	0.165462	-6.59843	4.15544e-11	3.88997e-10	487.86	520.184	195.851	246.482	252.834
ENSG00000129353.14_SLC44A2	3509.52	-0.666278	0.10103	-6.59483	4.25743e-11	3.98342e-10	4121.87	4919.03	2918.35	2889.43	2698.94
ENSG00000169299.13_PGM2	1580.95	0.652261	0.0989268	6.59337	4.29957e-11	4.0208e-10	1248.24	1099.43	1873.25	1884.24	1799.58
ENSG00000179021.9_C3orf38	1320.04	0.644395	0.0977434	6.59272	4.31844e-11	4.03639e-10	978.152	989.258	1592.13	1576.14	1464.51
ENSG00000165521.15_EML5	433.502	-0.921191	0.139732	-6.59255	4.3234e-11	4.03898e-10	609.52	606.503	327.544	336.988	286.954
ENSG00000115520.8_COQ10B	1363.95	0.614545	0.0932209	6.59235	4.32912e-11	4.04227e-10	1058.45	1005.16	1556.68	1600.21	1599.24
ENSG00000279767.1_AL513523.2	38.3588	3.23105	0.4904	6.5886	4.43995e-11	4.14366e-10	0	0	43.0535	28.8847	119.856
ENSG00000170100.13_ZNF778	575.994	0.830736	0.126181	6.58367	4.58986e-11	4.28139e-10	366.199	413.421	700.674	688.418	711.26
ENSG00000104687.12_GSR	2108.91	-0.61869	0.0940013	-6.58172	4.65028e-11	4.33555e-10	2845.64	2498.7	1717.92	1717.67	1764.59
ENSG00000116128.9_BCL9	1113.66	-0.781931	0.11891	-6.57579	4.83949e-11	4.50739e-10	1395.45	1588.95	933.67	864.614	785.623
ENSG00000134138.19_MEIS2	1863.71	-0.6048	0.0919731	-6.57583	4.83811e-11	4.50739e-10	2410.1	2289.72	1612.4	1545.33	1461.01
ENSG00000212719.10_C17orf51	1004.39	0.666178	0.101319	6.57502	4.86455e-11	4.52844e-10	750.647	730.302	1178.48	1153.46	1209.05
ENSG00000089009.15_RPL6	28977.8	-0.431563	0.0656536	-6.57334	4.92e-11	4.57774e-10	35113.7	33529.2	25692	25360.7	25193.3
ENSG00000135124.14_P2RX4	540.08	0.878628	0.133748	6.56929	5.05541e-11	4.70135e-10	350.383	362.312	622.165	649.905	715.634
ENSG00000075461.5_CACNG4	26.1805	-2.81622	0.428859	-6.56679	5.1412e-11	4.77872e-10	62.047	55.6529	5.06512	2.88847	5.24915
ENSG00000145022.4_TCTA	1021	-0.686923	0.10461	-6.5665	5.15121e-11	4.7856e-10	1361.38	1287.97	778.339	816.473	860.861
ENSG00000151151.5_IPMK	535.408	0.919967	0.140106	6.56621	5.16134e-11	4.7926e-10	371.065	320.288	709.116	662.421	614.151
ENSG00000169967.16_MAP3K2	2531.39	-0.640769	0.0975891	-6.566	5.1686e-11	4.79692e-10	3043.95	3419.81	2170.4	2089.32	1933.44
ENSG00000260910.1_LINC00565	58.1956	2.34713	0.357814	6.55963	5.39412e-11	5.0037e-10	8.51625	17.0366	78.5093	92.4309	94.4847
ENSG00000112297.14_AIM1	231.965	1.18818	0.181227	6.55632	5.5153e-11	5.11353e-10	118.011	138.564	303.907	307.14	292.203
ENSG00000005893.15_LAMP2	8424.54	-0.608363	0.0928092	-6.55499	5.56464e-11	5.15408e-10	10624.6	10645.6	7537.74	7002.6	6312.11
ENSG00000170684.8_ZNF296	66.4754	2.31229	0.352749	6.55505	5.56243e-11	5.15408e-10	15.8159	14.765	88.6395	82.8027	130.354
ENSG00000130479.10_MAP1S	1737.35	0.777307	0.118587	6.55474	5.57403e-11	5.16018e-10	1159.43	1259.57	1865.65	2066.22	2335.87
ENSG00000019549.8_SNAI2	257.8	1.17903	0.179885	6.55433	5.58935e-11	5.17177e-10	127.744	159.008	343.584	314.843	343.819
ENSG00000125775.14_SDCBP2	82.0208	2.05881	0.314176	6.55307	5.63659e-11	5.21286e-10	30.4152	18.1724	128.316	101.096	132.104
ENSG00000168234.12_TTC39C	612.385	-0.813148	0.124121	-6.55125	5.70582e-11	5.27423e-10	880.824	778.004	487.939	460.229	454.926
ENSG00000082126.17_MPP4	339.092	0.998777	0.152499	6.54941	5.77648e-11	5.33687e-10	200.74	218.068	442.353	417.865	416.433
ENSG00000142065.13_ZFP14	140.603	-1.48167	0.226247	-6.54891	5.79599e-11	5.3522e-10	253.054	213.525	91.1721	77.0258	68.239
ENSG00000132274.15_TRIM22	5500.98	0.87599	0.13385	6.54459	5.96603e-11	5.50646e-10	3519.64	3750.32	7977.56	6652.14	5605.22
ENSG00000104689.9_TNFRSF10A	458.245	1.07941	0.164941	6.54422	5.98068e-11	5.51721e-10	236.022	304.387	651.712	568.065	531.039
ENSG00000023318.7_ERP44	2238.74	0.675696	0.103282	6.54222	6.06114e-11	5.58864e-10	1676.48	1608.25	2833.09	2690.12	2385.74
ENSG00000234545.7_FAM133B	1267.95	0.633334	0.0968297	6.5407	6.12314e-11	5.64298e-10	981.802	918.84	1516.16	1475.04	1447.89
ENSG00000000938.12_FGR	23.2831	3.17209	0.485001	6.54037	6.13658e-11	5.64806e-10	0	0	42.2093	36.5872	37.6189
ENSG00000139880.19_CDH24	415.267	-0.917442	0.140274	-6.54034	6.13786e-11	5.64806e-10	579.105	584.923	302.219	281.144	328.947
[truncated: 5,952 more rows]
