# Supplementary material for: Differential Susceptibility of Fetal Retinal Pigment Epithelial Cells, hiPSC- Retinal Stem Cells, and Retinal Organoids to Zika Virus Infection
Source: Viruses. 2023 Jan 1;15(1):142. doi: 10.3390/v15010142 (PMC9864143; doi:10.3390/v15010142)
Supplement: Supplementary file 1 [file viruses-15-00142-s001.zip › Table_S4.xlsx]

## Sheet: 2 dpi vs Mock
Up-regulated	Down-regulated
ALDOC	SHROOM4
RPL35A	MAP1B
PGD	EPHX2
PDHB	ACTBL2
KRT2	ACTC1
DYNC1H1
GARS
RAD23B
UGDH
PAICS
PSMC1
SUCLG1
SRSF2
POR
HIST1H3F
HIST2H3A
CTSD
HSD17B12
GDI1
SOD2
ALDH18A1
RPS17;
HIST2H2AA4;
MYH10
PPP1CA
KRT19
PSAP
PSMD2

## Sheet: 4 dpi vs Mock
Up-regulated	Down-regulated
ISG15	CCAR2
HBD	UGGT1
MX1	FUBP1
RANBP1	PCYOX1
STAT1	ATP6V1A
UBE2L3	AK3
LAP3	TTYH3
ACLY	SEPT9
ARPC3	ALDH1B1
TGM2	SCCPDH
IPO5	OGDH
PSMD2	GNS
GNB2L1; RACK1	MBOAT7
HSPA1B; HSPA1A	EMC1
ARF3	PLOD3
PPP2CB	TOP1
ARF4	GBA
HMGB1	NDUFV1
	ATP6V1G1
	MGST3
	TXNDC12
	TMED7
	ERLIN2
	TMEM43
	GLS
	PDHA1
	CD81
	LEPRE1; P3H1
	SNRNP70
	TST
	ATP5J
	COX5B
	GLS
	HSD17B10
	MEST
	DHCR24
	TRA2B
	HNRNPDL
	RNPS1
	ETFB
	ACAT1
	FH
	NPC2
	RSL1D1
	SLC25A1
	PTPLAD1
	PITRM1
	MTCH2
	MFGE8
	DENND4A
	PRPF19
	PMPCA
	LMAN2
	CD151
	CD63
