# Supplementary material for: Differential Susceptibility of Fetal Retinal Pigment Epithelial Cells, hiPSC- Retinal Stem Cells, and Retinal Organoids to Zika Virus Infection
Source: Viruses. 2023 Jan 1;15(1):142. doi: 10.3390/v15010142 (PMC9864143; doi:10.3390/v15010142)
Supplement: Supplementary file 1 [file viruses-15-00142-s001.zip › Table_S5.xlsx]

## Sheet: Sheet1
					Table S5
						Antibodies	Company	Catalog Number
					1	Flavivirus group antigen Antibody (D1-4G2-4-15 (4G2))	Novus	NBP2-52666
					2	Zika virus NS4B protein antibody, rabbit polyclonal	GeneTex	GTX133311
					3	Cleaved Caspase-3 (Asp175) Antibody	Cell Signaling	9661S
					4	Purified anti-Pax-6 Antibody	Biolegend	901301
					5	LHX2 Antibody (C-20)	Santa Cruz Biotechnology	sc-81311
					6	Anti-Chx10 Antibody (VSX2), NT	EMD Millipore	AB9016
					7	Microphthalmia (Transcription Factor) (MiTF) Ab-1, Mouse Monoclonal Antibody	Thermo Fisher Scientific	MS771P0
					8	ZO-1 Polyclonal Antibody (Rabbit)	Thermo Fisher Scientific	40-2200
					9	Anti-Bestrophin Antibody	EMD Millipore	MAB5466
					10	Anti-Retinal Pigment Epithelium 65 Antibody	EMD Millipore	MAB5428
					11	Rabbit IgG isotype control	Thermo Fisher Scientific	#02-6102
					12	Sheep IgG Isotype Control	Thermo Fisher Scientific	PI31243
					13	Mouse IgG isotype control	Invitrogen	10400C
					14	Goat anti-rabbit Alexa Flour-488	Thermo Fisher Scientific	A-11008
					15	Goat anti-mouse Alexa Flour-555	Thermo Fisher Scientific	A32727
					16	Donkey anti-rabbit Alexa Fluor-555	Thermo Fisher Scientific	A31572
					17	Alexa Fluor® 647 AffiniPure Donkey Anti-Sheep IgG (H+L)	Jackson ImmunoResearch	713-605-147
